# Supplementary material for: Quantitative Trait Locus and Brain Expression of HLA-DPA1 Offers Evidence of Shared Immune Alterations in Psychiatric Disorders
Source: Microarrays (Basel). 2016 Mar 7;5(1):6. doi: 10.3390/microarrays5010006 (PMC4795482; doi:10.3390/microarrays5010006)
Supplement: Supplementary file 1 [file microarrays-05-00006-s001.zip › 19. Supplementary Material/microarrays-94190-supplementary.xlsx]

## Sheet: subjects_MHCArray_qPCR_ST1
The brain pH values are from cerebellum. RIN values were obtained for AnCng and DLPFC.		Platform	HSB	Diagnosis	BrainRegion	Gender	Age	pH	RIN
		Exon Array HSB	1834	C	AnCng	M	40	6.76	9.4
		Exon Array HSB	2169	C	AnCng	M	18	6.97	7.9
		Exon Array HSB	2292	C	AnCng	M	55	6.89	7.7
		Exon Array HSB	2311	BP	AnCng	M	23	7.12	8.6
		Exon Array HSB	2466	BP	AnCng	M	26	6.92	8.4
		Exon Array HSB	2566	BP	AnCng	F	56	6.83	8
		Exon Array HSB	2805	C	AnCng	M	45	6.86	7.5
		Exon Array HSB	3079	BP	AnCng	M	32	6.94	6.9
		Exon Array HSB	3085	BP	AnCng	M	63	6.87	5.8
		Exon Array HSB	3433	C	AnCng	M	39	7.02	7.2
		Exon Array HSB	3516	C	AnCng	M	41	7.01	8.4
		Exon Array HSB	3588	C	AnCng	M	56	6.98	8.6
		Exon Array HSB	3618	BP	AnCng	F	36	7	---
		Exon Array HSB	3711	BP	AnCng	F	59	6.55	8.8
		Exon Array HSB	3772	BP	AnCng	M	70	6.96	8.3
		Exon Array HSB	3850	C	AnCng	M	69	7.12	8.8
		Exon Array HSB	3878	C	AnCng	M	75	7.18	8.4
		Exon Array HSB	3896	C	AnCng	F	63	7.25	7
		Exon Array HSB	4063	C	AnCng	M	32	7.04	7.9
		Exon Array HSB	4087	BP	AnCng	F	51	6.81	9.1
		qPCR	1834	Control	DLPFC	M	40	6.76	8.5
		qPCR	1856	Control	DLPFC	M	54	6.97	8.3
		qPCR	1881	BP	DLPFC	M	69	6.91	8.2
		qPCR	2169	Control	DLPFC	M	18	6.97	6.5
		qPCR	2185	Control	DLPFC	M	19	6.59	6.6
		qPCR	2208	MD	DLPFC	F	72	7.13	7.1
		qPCR	2248	Control	DLPFC	F	64	6.83	7.8
		qPCR	2267	MD	DLPFC	M	19	7.11	8.3
		qPCR	2292	Control	DLPFC	M	55	6.89	7.4
		qPCR	2311	BP	DLPFC	M	23	7.12	8.2
		qPCR	2315	MD	DLPFC	M	58	6.93	7.9
		qPCR	2316	Control	DLPFC	M	58	7.02	7.6
		qPCR	2353	Schiz	DLPFC	F	31	6.77	8.2
		qPCR	2384	Schiz	DLPFC	M	50	6.81	8.7
		qPCR	2466	BP	DLPFC	M	26	6.92	7.5
		qPCR	2505	Schiz	DLPFC	M	39	6.83	8.4
		qPCR	2506	Schiz	DLPFC	F	47	7.17	7.8
		qPCR	2566	BP	DLPFC	F	56	6.83	7.4
		qPCR	2619	Control	DLPFC	M	48	6.79	8.3
		qPCR	2664	Control	DLPFC	M	43	7.1	8.4
		qPCR	2805	Control	DLPFC	M	45	6.86	7.8
		qPCR	2861	Control	DLPFC	F	60	6.99	7
		qPCR	2895	Control	DLPFC	M	48	6.62	8.1
		qPCR	2941	Schiz	DLPFC	M	48	6.93	8.5
		qPCR	2944	MD	DLPFC	M	52	6.82	6.1
		qPCR	2950	Schiz	DLPFC	M	45	7.05	6.6
		qPCR	2956	Schiz	DLPFC	M	44	7.21	8.2
		qPCR	2976	Schiz	DLPFC	F	53	6.78	2.2
		qPCR	3004	MD	DLPFC	F	48	6.95	7.8
		qPCR	3018	Control	DLPFC	M	70	7.03	8.4
		qPCR	3031	MD	DLPFC	M	49	7.19	7.9
		qPCR	3038	BP	DLPFC	M	52	7.05	7.9
		qPCR	3064	MD	DLPFC	M	46	6.91	8.4
		qPCR	3071	MD	DLPFC	M	49	7	7.7
		qPCR	3079	BP	DLPFC	M	32	6.94	8
		qPCR	3085	BP	DLPFC	M	63	6.87	7.2
		qPCR	3114	MD	DLPFC	M	57	6.84	8.5
		qPCR	3145	Control	DLPFC	M	77	6.62	8.7
		qPCR	3169	MD	DLPFC	M	35	7.04	7.5
		qPCR	3186	Control	DLPFC	M	32	6.97	7.9
		qPCR	3228	Control	DLPFC	M	39	6.81	8.2
		qPCR	3241	BP	DLPFC	M	59	6.99	8.4
		qPCR	3273	Control	DLPFC	F	47	6.3	7.9
		qPCR	3275	Control	DLPFC	M	35	6.76	8.5
		qPCR	3281	Control	DLPFC	F	70	6.9	8.2
		qPCR	3306	MD	DLPFC	F	50	6.59	8.6
		qPCR	3317	MD	DLPFC	M	34	6.71	8.1
		qPCR	3365	MD	DLPFC	M	47	7.25	7.6
		qPCR	3370	BP	DLPFC	F	34	6.73	8.5
		qPCR	3398	MD	DLPFC	F	80	6.68	8.1
		qPCR	3410	Schiz	DLPFC	M	36	7.12	8.3
		qPCR	3426	MD	DLPFC	M	63	7.17	8.1
		qPCR	3428	Control	DLPFC	M	71	7.25	8.3
		qPCR	3433	Control	DLPFC	M	39	7.02	8.4
		qPCR	3445	Control	DLPFC	F	63	7.01	7.4
		qPCR	3451	BP	DLPFC	M	49	6.87	7.5
		qPCR	3452	BP	DLPFC	F	69	6.65	7.1
		qPCR	3481	MD	DLPFC	M	66	7.05	7.6
		qPCR	3516	Control	DLPFC	M	41	7.01	8.3
		qPCR	3519	Control	DLPFC	M	65	6.88	8.1
		qPCR	3520	Control	DLPFC	F	74	7.21	7.8
		qPCR	3523	Control	DLPFC	M	40	7.07	7
		qPCR	3525	Schiz	DLPFC	M	42	7.04	8.6
		qPCR	3544	Control	DLPFC	M	60	6.8	7.2
		qPCR	3572	Control	DLPFC	M	49	6.68	7.8
		qPCR	3588	Control	DLPFC	M	56	6.98	8.1
		qPCR	3618	BP	DLPFC	F	36	7	7.9
		qPCR	3634	MD	DLPFC	M	19	7.06	7.2
		qPCR	3651	Schiz	DLPFC	M	40	6.9	8.2
		qPCR	3659	BP	DLPFC	M	73	6.62	8.4
		qPCR	3667	MD	DLPFC	M	28	7.07	7.7
		qPCR	3684	Schiz	DLPFC	M	63	7.02	8.6
		qPCR	3686	Control	DLPFC	M	66	6.94	8.2
		qPCR	3706	Control	DLPFC	M	63	6.88	8
		qPCR	3709	MD	DLPFC	F	53	7.16	8
		qPCR	3710	MD	DLPFC	M	56	6.9	7.8
		qPCR	3711	BP	DLPFC	F	59	6.55	8.2
		qPCR	3755	MD	DLPFC	M	34	7.13	8.3
		qPCR	3772	BP	DLPFC	M	70	6.96	8.1
		qPCR	3776	Control	DLPFC	M	55	7.18	7.8
		qPCR	3836	MD	DLPFC	F	46	6.76	8.4
		qPCR	3850	Control	DLPFC	M	69	7.12	6.8
		qPCR	3878	Control	DLPFC	M	75	7.18	7.5
		qPCR	3888	MD	DLPFC	M	52	6.58	8.1
		qPCR	3896	Control	DLPFC	M	63	7.25	7.3
		qPCR	3927	BP	DLPFC	M	36	6.69	7.9
		qPCR	3933	Schiz	DLPFC	M	50	6.55	7.8
		qPCR	3947	Control	DLPFC	F	73	7.21	8
		qPCR	3952	Control	DLPFC	M	56	7.14	7.5
		qPCR	3965	Control	DLPFC	M	67	6.96	7.6
		qPCR	3974	MD	DLPFC	F	46	---	8.2
		qPCR	3982	MD	DLPFC	M	40	6.99	7.2
		qPCR	3994	MD	DLPFC	M	50	6.84	8.1
		qPCR	4001	MD	DLPFC	M	39	7.18	8.1
		qPCR	4015	Control	DLPFC	M	30	7.15	8.7
		qPCR	4046	MD	DLPFC	M	24	7.16	7
		qPCR	4054	Control	DLPFC	M	79	7	7.9
		qPCR	4063	Control	DLPFC	M	32	7.04	8.3
		qPCR	4069	Control	DLPFC	F	62	7.11	7.9
		qPCR	4082	MD	DLPFC	M	34	6.51	8.5
		qPCR	4087	BP	DLPFC	F	51	6.81	8.9
		qPCR	4101	MD	DLPFC	M	29	6.3	9.2
		qPCR	4111	Control	DLPFC	M	58	6.58	7.6
		qPCR	4114	Schiz	DLPFC	F	58	6.59	9
		qPCR	4115	MD	DLPFC	M	62	6.47	8.5
		qPCR	4146	MD	DLPFC	M	48	6.41	8.2
		qPCR	4191	Control	DLPFC	M	52	6.53	8.1
		qPCR	4207	Control	DLPFC	M	59	6.4	8.8
		qPCR	4213	Schiz	DLPFC	M	35	6.61	8.7
		qPCR	4236	Control	DLPFC	M	63	6.5	8.3
		qPCR	4241	MD	DLPFC	M	31	7	7.8
		qPCR	4250	Control	DLPFC	M	64	7.13	8.3
		qPCR	1834	Control	AnCng	M	40	6.76	9.4
		qPCR	1856	Control	AnCng	M	54	6.97	9
		qPCR	2169	Control	AnCng	M	18	6.97	7.9
		qPCR	2185	Control	AnCng	M	19	6.59	6.5
		qPCR	2208	MD	AnCng	F	72	7.13	8.1
		qPCR	2248	Control	AnCng	F	64	6.83	8.3
		qPCR	2267	MD	AnCng	M	19	7.11	8.5
		qPCR	2292	Control	AnCng	M	55	6.89	7.7
		qPCR	2311	BP	AnCng	M	23	7.12	8.6
		qPCR	2315	MD	AnCng	M	58	6.93	7.5
		qPCR	2316	Control	AnCng	M	58	7.02	7.8
		qPCR	2353	Schiz	AnCng	F	31	6.77	7.6
		qPCR	2384	Schiz	AnCng	M	50	6.81	8.6
		qPCR	2466	BP	AnCng	M	26	6.92	8.4
		qPCR	2505	Schiz	AnCng	M	39	6.83	9.1
		qPCR	2506	Schiz	AnCng	F	47	7.17	7.4
		qPCR	2566	BP	AnCng	F	56	6.83	8
		qPCR	2619	Control	AnCng	M	48	6.79	5.6
		qPCR	2664	Control	AnCng	M	43	7.1	8.6
		qPCR	2805	Control	AnCng	M	45	6.86	7.5
		qPCR	2861	Control	AnCng	F	60	6.99	7.8
		qPCR	2941	Schiz	AnCng	M	48	6.93	8.4
		qPCR	2944	MD	AnCng	M	52	6.82	7.9
		qPCR	2950	Schiz	AnCng	M	45	7.05	8.2
		qPCR	2956	Schiz	AnCng	M	44	7.21	8.2
		qPCR	2976	Schiz	AnCng	F	53	6.78	8.3
		qPCR	3004	MD	AnCng	F	48	6.95	8.1
		qPCR	3018	Control	AnCng	M	70	7.03	7.3
		qPCR	3031	MD	AnCng	M	49	7.19	7.1
		qPCR	3038	BP	AnCng	M	52	7.05	8.3
		qPCR	3064	MD	AnCng	M	46	6.91	8
		qPCR	3071	MD	AnCng	M	49	7	7.4
		qPCR	3079	BP	AnCng	M	32	6.94	6.9
		qPCR	3085	BP	AnCng	M	63	6.87	5.8
		qPCR	3114	MD	AnCng	M	57	6.84	8.2
		qPCR	3145	Control	AnCng	M	77	6.62	8.6
		qPCR	3168	MD	AnCng	M	39	6.79	8.4
		qPCR	3169	MD	AnCng	M	35	7.04	7.9
		qPCR	3186	Control	AnCng	M	32	6.97	8.4
		qPCR	3196	Control	AnCng	M	44	6.87	7.8
		qPCR	3228	Control	AnCng	M	39	6.81	8.8
		qPCR	3241	BP	AnCng	M	59	6.99	8.8
		qPCR	3273	Control	AnCng	F	47	6.3	8.9
		qPCR	3275	Control	AnCng	M	35	6.76	8.5
		qPCR	3281	Control	AnCng	F	70	6.9	8.5
		qPCR	3306	MD	AnCng	F	50	6.59	9.2
		qPCR	3317	MD	AnCng	M	34	6.71	6.5
		qPCR	3365	MD	AnCng	M	47	7.25	8.7
		qPCR	3370	BP	AnCng	F	34	6.73	7.5
		qPCR	3398	MD	AnCng	F	80	6.68	7.7
		qPCR	3410	Schiz	AnCng	M	36	7.12	8.4
		qPCR	3426	MD	AnCng	M	63	7.17	8.5
		qPCR	3428	Control	AnCng	M	71	7.25	6
		qPCR	3433	Control	AnCng	M	39	7.02	7.2
		qPCR	3445	Control	AnCng	F	63	7.01	8
		qPCR	3451	BP	AnCng	M	49	6.87	7.6
		qPCR	3452	BP	AnCng	F	69	6.65	6.3
		qPCR	3481	MD	AnCng	M	66	7.05	7.5
		qPCR	3516	Control	AnCng	M	41	7.01	8.4
		qPCR	3519	Control	AnCng	M	65	6.88	8.2
		qPCR	3520	Control	AnCng	F	74	7.21	8.4
		qPCR	3523	Control	AnCng	M	40	7.07	7.7
		qPCR	3525	Schiz	AnCng	M	42	7.04	9.3
		qPCR	3544	Control	AnCng	M	60	6.8	8
		qPCR	3572	Control	AnCng	M	49	6.68	6.8
		qPCR	3588	Control	AnCng	M	56	6.98	8.6
		qPCR	3634	MD	AnCng	M	19	7.06	7.6
		qPCR	3651	Schiz	AnCng	M	40	6.9	8.1
		qPCR	3659	BP	AnCng	M	73	6.62	7.3
		qPCR	3667	MD	AnCng	M	28	7.07	7
		qPCR	3671	MD	AnCng	F	44	7.06	7.5
		qPCR	3684	Schiz	AnCng	M	63	7.02	7.8
		qPCR	3686	Control	AnCng	M	66	6.94	8.4
		qPCR	3706	Control	AnCng	M	63	6.88	8.7
		qPCR	3709	MD	AnCng	F	53	7.16	8.3
		qPCR	3710	MD	AnCng	M	56	6.9	7.9
		qPCR	3711	BP	AnCng	F	59	6.55	8.8
		qPCR	3755	MD	AnCng	M	34	7.13	7.8
		qPCR	3772	BP	AnCng	M	70	6.96	8.3
		qPCR	3774	Control	AnCng	F	45	7.05	6.6
		qPCR	3776	Control	AnCng	M	55	7.18	7.7
		qPCR	3836	MD	AnCng	F	46	6.76	8.1
		qPCR	3850	Control	AnCng	M	69	7.12	8.8
		qPCR	3878	Control	AnCng	M	75	7.18	8.4
		qPCR	3888	MD	AnCng	M	52	6.58	7.9
		qPCR	3896	Control	AnCng	M	63	7.25	7
		qPCR	3933	Schiz	AnCng	M	50	6.55	7.8
		qPCR	3947	Control	AnCng	F	73	7.21	8.1
		qPCR	3952	Control	AnCng	M	56	7.14	7
		qPCR	3965	Control	AnCng	M	67	6.96	8.3
		qPCR	3974	MD	AnCng	F	46	---	8.6
		qPCR	3982	MD	AnCng	M	40	6.99	10
		qPCR	3994	MD	AnCng	M	50	6.84	9.9
		qPCR	4001	MD	AnCng	M	39	7.18	10
		qPCR	4015	Control	AnCng	M	30	7.15	7.4
		qPCR	4046	MD	AnCng	M	24	7.16	7
		qPCR	4054	Control	AnCng	M	79	7	10
		qPCR	4063	Control	AnCng	M	32	7.04	7.9
		qPCR	4069	Control	AnCng	F	62	7.11	10
		qPCR	4082	MD	AnCng	M	34	6.51	8.6
		qPCR	4087	BP	AnCng	F	51	6.81	9.1
		qPCR	4101	MD	AnCng	M	29	6.3	8.9
		qPCR	4111	Control	AnCng	M	58	6.58	8.3
		qPCR	4114	Schiz	AnCng	F	58	6.59	8.5
		qPCR	4115	MD	AnCng	M	62	6.47	8.4
		qPCR	4146	MD	AnCng	M	48	6.41	8.2
		qPCR	4191	Control	AnCng	M	52	6.53	8.4
		qPCR	4207	Control	AnCng	M	59	6.4	9.3
		qPCR	4213	Schiz	AnCng	M	35	6.61	8.3
		qPCR	4236	Control	AnCng	M	63	6.5	8.4
		qPCR	4241	MD	AnCng	M	31	7	8.8
		qPCR	4250	Control	AnCng	M	64	7.13	9.2
		qPCR	1881	BP	Amg	M	69	6.91	---
		qPCR	2169	Control	Amg	M	18	6.97	---
		qPCR	2185	Control	Amg	M	19	6.59	---
		qPCR	2208	MD	Amg	F	72	7.13	---
		qPCR	2267	MD	Amg	M	19	7.11	---
		qPCR	2292	Control	Amg	M	55	6.89	---
		qPCR	2311	BP	Amg	M	23	7.12	---
		qPCR	2316	Control	Amg	M	58	7.02	---
		qPCR	2353	Schiz	Amg	F	31	6.77	---
		qPCR	2466	BP	Amg	M	26	6.92	---
		qPCR	2805	Control	Amg	M	45	6.86	---
		qPCR	2861	Control	Amg	F	60	6.99	---
		qPCR	2944	MD	Amg	M	52	6.82	---
		qPCR	2950	Schiz	Amg	M	45	7.05	---
		qPCR	2976	Schiz	Amg	F	53	6.78	---
		qPCR	3004	MD	Amg	F	48	6.95	---
		qPCR	3018	Control	Amg	M	70	7.03	---
		qPCR	3031	MD	Amg	M	49	7.19	---
		qPCR	3038	BP	Amg	M	52	7.05	---
		qPCR	3064	MD	Amg	M	46	6.91	---
		qPCR	3071	MD	Amg	M	49	7	---
		qPCR	3079	BP	Amg	M	32	6.94	---
		qPCR	3114	MD	Amg	M	57	6.84	---
		qPCR	3145	Control	Amg	M	77	6.62	---
		qPCR	3168	MD	Amg	M	39	6.79	---
		qPCR	3169	MD	Amg	M	35	7.04	---
		qPCR	3186	Control	Amg	M	32	6.97	---
		qPCR	3196	Control	Amg	M	44	6.87	---
		qPCR	3228	Control	Amg	M	39	6.81	---
		qPCR	3241	BP	Amg	M	59	6.99	---
		qPCR	3273	Control	Amg	F	47	6.3	---
		qPCR	3275	Control	Amg	M	35	6.76	---
		qPCR	3281	Control	Amg	F	70	6.9	---
		qPCR	3306	MD	Amg	F	50	6.59	---
		qPCR	3317	MD	Amg	M	34	6.71	---
		qPCR	3365	MD	Amg	M	47	7.25	---
		qPCR	3370	BP	Amg	F	34	6.73	---
		qPCR	3398	MD	Amg	F	80	6.68	---
		qPCR	3410	Schiz	Amg	M	36	7.12	---
		qPCR	3426	MD	Amg	M	63	7.17	---
		qPCR	3428	Control	Amg	M	71	7.25	---
		qPCR	3433	Control	Amg	M	39	7.02	---
		qPCR	3445	Control	Amg	F	63	7.01	---
		qPCR	3451	BP	Amg	M	49	6.87	---
		qPCR	3452	BP	Amg	F	69	6.65	---
		qPCR	3481	MD	Amg	M	66	7.05	---
		qPCR	3516	Control	Amg	M	41	7.01	---
		qPCR	3519	Control	Amg	M	65	6.88	---
		qPCR	3520	Control	Amg	F	74	7.21	---
		qPCR	3523	Control	Amg	M	40	7.07	---
		qPCR	3525	Schiz	Amg	M	42	7.04	---
		qPCR	3544	Control	Amg	M	60	6.8	---
		qPCR	3572	Control	Amg	M	49	6.68	---
		qPCR	3588	Control	Amg	M	56	6.98	---
		qPCR	3618	BP	Amg	F	36	7	---
		qPCR	3634	MD	Amg	M	19	7.06	---
		qPCR	3651	Schiz	Amg	M	40	6.9	---
		qPCR	3659	BP	Amg	M	73	6.62	---
		qPCR	3667	MD	Amg	M	28	7.07	---
		qPCR	3671	MD	Amg	F	44	7.06	---
		qPCR	3684	Schiz	Amg	M	63	7.02	---
		qPCR	3686	Control	Amg	M	66	6.94	---
		qPCR	3706	Control	Amg	M	63	6.88	---
		qPCR	3709	MD	Amg	F	53	7.16	---
		qPCR	3710	MD	Amg	M	56	6.9	---
		qPCR	3711	BP	Amg	F	59	6.55	---
		qPCR	3755	MD	Amg	M	34	7.13	---
		qPCR	3774	Control	Amg	F	45	7.05	---
		qPCR	3836	MD	Amg	F	46	6.76	---
		qPCR	3850	Control	Amg	M	69	7.12	---
		qPCR	3878	Control	Amg	M	75	7.18	---
		qPCR	3888	MD	Amg	M	52	6.58	---
		qPCR	3896	Control	Amg	M	63	7.25	---
		qPCR	3927	BP	Amg	M	36	6.69	---
		qPCR	3933	Schiz	Amg	M	50	6.55	---
		qPCR	3947	Control	Amg	F	73	7.21	---
		qPCR	3952	Control	Amg	M	56	7.14	---
		qPCR	3965	Control	Amg	M	67	6.96	---
		qPCR	3974	MD	Amg	F	46	---	---
		qPCR	3982	MD	Amg	M	40	6.99	---
		qPCR	3994	MD	Amg	M	50	6.84	---
		qPCR	4001	MD	Amg	M	39	7.18	---
		qPCR	4015	Control	Amg	M	30	7.15	---
		qPCR	4046	MD	Amg	M	24	7.16	---
		qPCR	4054	Control	Amg	M	79	7	---
		qPCR	4063	Control	Amg	M	32	7.04	---
		qPCR	4069	Control	Amg	F	62	7.11	---
		qPCR	4082	MD	Amg	M	34	6.51	---
		qPCR	4087	BP	Amg	F	51	6.81	---
		qPCR	4101	MD	Amg	M	29	6.3	---
		qPCR	4111	Control	Amg	M	58	6.58	---
		qPCR	4114	Schiz	Amg	F	58	6.59	---
		qPCR	4115	MD	Amg	M	62	6.47	---
		qPCR	4191	Control	Amg	M	52	6.53	---
		qPCR	4207	Control	Amg	M	59	6.4	---
		qPCR	4213	Schiz	Amg	M	35	6.61	---
		qPCR	4236	Control	Amg	M	63	6.5	---
		qPCR	4241	MD	Amg	M	31	7	---
		qPCR	4250	Control	Amg	M	64	7.13	---
		qPCR	1834	Control	NACC	M	40	6.76	---
		qPCR	1856	Control	NACC	M	54	6.97	---
		qPCR	1881	BP	NACC	M	69	6.91	---
		qPCR	2169	Control	NACC	M	18	6.97	---
		qPCR	2185	Control	NACC	M	19	6.59	---
		qPCR	2208	MD	NACC	F	72	7.13	---
		qPCR	2248	Control	NACC	F	64	6.83	---
		qPCR	2267	MD	NACC	M	19	7.11	---
		qPCR	2292	Control	NACC	M	55	6.89	---
		qPCR	2311	BP	NACC	M	23	7.12	---
		qPCR	2315	MD	NACC	M	58	6.93	---
		qPCR	2316	Control	NACC	M	58	7.02	---
		qPCR	2353	Schiz	NACC	F	31	6.77	---
		qPCR	2384	Schiz	NACC	M	50	6.81	---
		qPCR	2466	BP	NACC	M	26	6.92	---
		qPCR	2505	Schiz	NACC	M	39	6.83	---
		qPCR	2506	Schiz	NACC	F	47	7.17	---
		qPCR	2566	BP	NACC	F	56	6.83	---
		qPCR	2619	Control	NACC	M	48	6.79	---
		qPCR	2664	Control	NACC	M	43	7.1	---
		qPCR	2805	Control	NACC	M	45	6.86	---
		qPCR	2861	Control	NACC	F	60	6.99	---
		qPCR	2895	Control	NACC	M	48	6.62	---
		qPCR	2941	Schiz	NACC	M	48	6.93	---
		qPCR	2944	MD	NACC	M	52	6.82	---
		qPCR	2950	Schiz	NACC	M	45	7.05	---
		qPCR	2956	Schiz	NACC	M	44	7.21	---
		qPCR	2976	Schiz	NACC	F	53	6.78	---
		qPCR	3004	MD	NACC	F	48	6.95	---
		qPCR	3018	Control	NACC	M	70	7.03	---
		qPCR	3038	BP	NACC	M	52	7.05	---
		qPCR	3064	MD	NACC	M	46	6.91	---
		qPCR	3071	MD	NACC	M	49	7	---
		qPCR	3079	BP	NACC	M	32	6.94	---
		qPCR	3085	BP	NACC	M	63	6.87	---
		qPCR	3114	MD	NACC	M	57	6.84	---
		qPCR	3145	Control	NACC	M	77	6.62	---
		qPCR	3168	MD	NACC	M	39	6.79	---
		qPCR	3169	MD	NACC	M	35	7.04	---
		qPCR	3186	Control	NACC	M	32	6.97	---
		qPCR	3196	Control	NACC	M	44	6.87	---
		qPCR	3228	Control	NACC	M	39	6.81	---
		qPCR	3241	BP	NACC	M	59	6.99	---
		qPCR	3273	Control	NACC	F	47	6.3	---
		qPCR	3275	Control	NACC	M	35	6.76	---
		qPCR	3281	Control	NACC	F	70	6.9	---
		qPCR	3306	MD	NACC	F	50	6.59	---
		qPCR	3317	MD	NACC	M	34	6.71	---
		qPCR	3365	MD	NACC	M	47	7.25	---
		qPCR	3370	BP	NACC	F	34	6.73	---
		qPCR	3398	MD	NACC	F	80	6.68	---
		qPCR	3410	Schiz	NACC	M	36	7.12	---
		qPCR	3426	MD	NACC	M	63	7.17	---
		qPCR	3428	Control	NACC	M	71	7.25	---
		qPCR	3433	Control	NACC	M	39	7.02	---
		qPCR	3445	Control	NACC	F	63	7.01	---
		qPCR	3451	BP	NACC	M	49	6.87	---
		qPCR	3452	BP	NACC	F	69	6.65	---
		qPCR	3481	MD	NACC	M	66	7.05	---
		qPCR	3516	Control	NACC	M	41	7.01	---
		qPCR	3519	Control	NACC	M	65	6.88	---
		qPCR	3520	Control	NACC	F	74	7.21	---
		qPCR	3523	Control	NACC	M	40	7.07	---
		qPCR	3525	Schiz	NACC	M	42	7.04	---
		qPCR	3544	Control	NACC	M	60	6.8	---
		qPCR	3572	Control	NACC	M	49	6.68	---
		qPCR	3588	Control	NACC	M	56	6.98	---
		qPCR	3618	BP	NACC	F	36	7	---
		qPCR	3634	MD	NACC	M	19	7.06	---
		qPCR	3651	Schiz	NACC	M	40	6.9	---
		qPCR	3659	BP	NACC	M	73	6.62	---
		qPCR	3667	MD	NACC	M	28	7.07	---
		qPCR	3671	MD	NACC	F	44	7.06	---
		qPCR	3684	Schiz	NACC	M	63	7.02	---
		qPCR	3686	Control	NACC	M	66	6.94	---
		qPCR	3706	Control	NACC	M	63	6.88	---
		qPCR	3709	MD	NACC	F	53	7.16	---
		qPCR	3710	MD	NACC	M	56	6.9	---
		qPCR	3711	BP	NACC	F	59	6.55	---
		qPCR	3755	MD	NACC	M	34	7.13	---
		qPCR	3772	BP	NACC	M	70	6.96	---
		qPCR	3774	Control	NACC	F	45	7.05	---
		qPCR	3836	MD	NACC	F	46	6.76	---
		qPCR	3850	Control	NACC	M	69	7.12	---
		qPCR	3878	Control	NACC	M	75	7.18	---
		qPCR	3888	MD	NACC	M	52	6.58	---
		qPCR	3896	Control	NACC	M	63	7.25	---
		qPCR	3927	BP	NACC	M	36	6.69	---
		qPCR	3933	Schiz	NACC	M	50	6.55	---
		qPCR	3947	Control	NACC	F	73	7.21	---
		qPCR	3952	Control	NACC	M	56	7.14	---
		qPCR	3965	Control	NACC	M	67	6.96	---
		qPCR	3974	MD	NACC	F	46	---	---
		qPCR	3994	MD	NACC	M	50	6.84	---
		qPCR	4001	MD	NACC	M	39	7.18	---
		qPCR	4015	Control	NACC	M	30	7.15	---
		qPCR	4046	MD	NACC	M	24	7.16	---
		qPCR	4054	Control	NACC	M	79	7	---
		qPCR	4063	Control	NACC	M	32	7.04	---
		qPCR	4069	Control	NACC	F	62	7.11	---
		qPCR	4082	MD	NACC	M	34	6.51	---
		qPCR	4087	BP	NACC	F	51	6.81	---
		qPCR	4101	MD	NACC	M	29	6.3	---
		qPCR	4111	Control	NACC	M	58	6.58	---
		qPCR	4114	Schiz	NACC	F	58	6.59	---
		qPCR	4115	MD	NACC	M	62	6.47	---
		qPCR	4146	MD	NACC	M	48	6.41	---
		qPCR	4191	Control	NACC	M	52	6.53	---
		qPCR	4213	Schiz	NACC	M	35	6.61	---
		qPCR	4236	Control	NACC	M	63	6.5	---
		qPCR	4241	MD	NACC	M	31	7	---
		qPCR	4250	Control	NACC	M	64	7.13	---
		qPCR	1834	Control	Hipp	M	40	6.76	---
		qPCR	1856	Control	Hipp	M	54	6.97	---
		qPCR	1881	BP	Hipp	M	69	6.91	---
		qPCR	2185	Control	Hipp	M	19	6.59	---
		qPCR	2248	Control	Hipp	F	64	6.83	---
		qPCR	2267	MD	Hipp	M	19	7.11	---
		qPCR	2292	Control	Hipp	M	55	6.89	---
		qPCR	2311	BP	Hipp	M	23	7.12	---
		qPCR	2315	MD	Hipp	M	58	6.93	---
		qPCR	2316	Control	Hipp	M	58	7.02	---
		qPCR	2353	Schiz	Hipp	F	31	6.77	---
		qPCR	2384	Schiz	Hipp	M	50	6.81	---
		qPCR	2466	BP	Hipp	M	26	6.92	---
		qPCR	2505	Schiz	Hipp	M	39	6.83	---
		qPCR	2506	Schiz	Hipp	F	47	7.17	---
		qPCR	2566	BP	Hipp	F	56	6.83	---
		qPCR	2619	Control	Hipp	M	48	6.79	---
		qPCR	2664	Control	Hipp	M	43	7.1	---
		qPCR	2805	Control	Hipp	M	45	6.86	---
		qPCR	2861	Control	Hipp	F	60	6.99	---
		qPCR	2895	Control	Hipp	M	48	6.62	---
		qPCR	2941	Schiz	Hipp	M	48	6.93	---
		qPCR	2944	MD	Hipp	M	52	6.82	---
		qPCR	2950	Schiz	Hipp	M	45	7.05	---
		qPCR	2956	Schiz	Hipp	M	44	7.21	---
		qPCR	2976	Schiz	Hipp	F	53	6.78	---
		qPCR	3004	MD	Hipp	F	48	6.95	---
		qPCR	3018	Control	Hipp	M	70	7.03	---
		qPCR	3031	MD	Hipp	M	49	7.19	---
		qPCR	3038	BP	Hipp	M	52	7.05	---
		qPCR	3064	MD	Hipp	M	46	6.91	---
		qPCR	3071	MD	Hipp	M	49	7	---
		qPCR	3079	BP	Hipp	M	32	6.94	---
		qPCR	3085	BP	Hipp	M	63	6.87	---
		qPCR	3114	MD	Hipp	M	57	6.84	---
		qPCR	3145	Control	Hipp	M	77	6.62	---
		qPCR	3168	MD	Hipp	M	39	6.79	---
		qPCR	3169	MD	Hipp	M	35	7.04	---
		qPCR	3186	Control	Hipp	M	32	6.97	---
		qPCR	3196	Control	Hipp	M	44	6.87	---
		qPCR	3228	Control	Hipp	M	39	6.81	---
		qPCR	3241	BP	Hipp	M	59	6.99	---
		qPCR	3273	Control	Hipp	F	47	6.3	---
		qPCR	3275	Control	Hipp	M	35	6.76	---
		qPCR	3281	Control	Hipp	F	70	6.9	---
		qPCR	3306	MD	Hipp	F	50	6.59	---
		qPCR	3317	MD	Hipp	M	34	6.71	---
		qPCR	3365	MD	Hipp	M	47	7.25	---
		qPCR	3370	BP	Hipp	F	34	6.73	---
		qPCR	3398	MD	Hipp	F	80	6.68	---
		qPCR	3410	Schiz	Hipp	M	36	7.12	---
		qPCR	3426	MD	Hipp	M	63	7.17	---
		qPCR	3428	Control	Hipp	M	71	7.25	---
		qPCR	3433	Control	Hipp	M	39	7.02	---
		qPCR	3445	Control	Hipp	F	63	7.01	---
		qPCR	3451	BP	Hipp	M	49	6.87	---
		qPCR	3452	BP	Hipp	F	69	6.65	---
		qPCR	3481	MD	Hipp	M	66	7.05	---
		qPCR	3516	Control	Hipp	M	41	7.01	---
		qPCR	3519	Control	Hipp	M	65	6.88	---
		qPCR	3520	Control	Hipp	F	74	7.21	---
		qPCR	3525	Schiz	Hipp	M	42	7.04	---
		qPCR	3544	Control	Hipp	M	60	6.8	---
		qPCR	3572	Control	Hipp	M	49	6.68	---
		qPCR	3588	Control	Hipp	M	56	6.98	---
		qPCR	3618	BP	Hipp	F	36	7	---
		qPCR	3634	MD	Hipp	M	19	7.06	---
		qPCR	3651	Schiz	Hipp	M	40	6.9	---
		qPCR	3659	BP	Hipp	M	73	6.62	---
		qPCR	3667	MD	Hipp	M	28	7.07	---
		qPCR	3671	MD	Hipp	F	44	7.06	---
		qPCR	3686	Control	Hipp	M	66	6.94	---
		qPCR	3706	Control	Hipp	M	63	6.88	---
		qPCR	3709	MD	Hipp	F	53	7.16	---
		qPCR	3710	MD	Hipp	M	56	6.9	---
		qPCR	3711	BP	Hipp	F	59	6.55	---
		qPCR	3755	MD	Hipp	M	34	7.13	---
		qPCR	3772	BP	Hipp	M	70	6.96	---
		qPCR	3774	Control	Hipp	F	45	7.05	---
		qPCR	3836	MD	Hipp	F	46	6.76	---
		qPCR	3878	Control	Hipp	M	75	7.18	---
		qPCR	3888	MD	Hipp	M	52	6.58	---
		qPCR	3896	Control	Hipp	M	63	7.25	---
		qPCR	3927	BP	Hipp	M	36	6.69	---
		qPCR	3933	Schiz	Hipp	M	50	6.55	---
		qPCR	3947	Control	Hipp	F	73	7.21	---
		qPCR	3952	Control	Hipp	M	56	7.14	---
		qPCR	3965	Control	Hipp	M	67	6.96	---
		qPCR	3974	MD	Hipp	F	46	---	---
		qPCR	3982	MD	Hipp	M	40	6.99	---
		qPCR	3994	MD	Hipp	M	50	6.84	---
		qPCR	4001	MD	Hipp	M	39	7.18	---
		qPCR	4015	Control	Hipp	M	30	7.15	---
		qPCR	4046	MD	Hipp	M	24	7.16	---
		qPCR	4054	Control	Hipp	M	79	7	---
		qPCR	4063	Control	Hipp	M	32	7.04	---
		qPCR	4069	Control	Hipp	F	62	7.11	---
		qPCR	4082	MD	Hipp	M	34	6.51	---
		qPCR	4087	BP	Hipp	F	51	6.81	---
		qPCR	4101	MD	Hipp	M	29	6.3	---
		qPCR	4111	Control	Hipp	M	58	6.58	---
		qPCR	4114	Schiz	Hipp	F	58	6.59	---
		qPCR	4115	MD	Hipp	M	62	6.47	---
		qPCR	4146	MD	Hipp	M	48	6.41	---
		qPCR	4191	Control	Hipp	M	52	6.53	---
		qPCR	4207	Control	Hipp	M	59	6.4	---
		qPCR	4213	Schiz	Hipp	M	35	6.61	---
		qPCR	4236	Control	Hipp	M	63	6.5	---
		qPCR	4241	MD	Hipp	M	31	7	---
		qPCR	4250	Control	Hipp	M	64	7.13	---
		sequenced for alternative splicing	2311	BP	AnCng	M	23	7.12	8.6
		sequenced for alternative splicing	2805	C	AnCng	M	45	6.86	7.5
		sequenced for alternative splicing	3433	C	AnCng	M	39	7.02	7.2
		sequenced for alternative splicing	3896	C	AnCng	F	63	7.25	7

## Sheet: RefSeqTranscript_exonarray-ST2
Probesets#	Transcript	Acc	ID	seqname	strand	start	stop	total_probes	gene_assignment	p-value(Diagnosis)	p-value(Probe	p-value(Diagnosis*Probe)	p-value(Sample	Mean(1)	LSMean(1)	Min(1)	Max(1)	Mean(2)	LSMean(2)	Min(2)	Max(2)	p-value(1-2)	Mean(1-2)	Transcript	Transcript_Acc
28	3300793	NM_145246 // RefSeq // Homo sapiens chromosome 10 open reading frame 4 (C10orf4)	NM_145246 // Hs.303727 // testis; whole body; spleen; larynx; connective tissue;	chr10	-	95418202	95452543	124	NM_145246 // C10orf4 // chromosome 10 open reading frame 4 // 10q23.33 // 118924	0.0713841	0	1.24075e-12	0	5.26532	5.26532	1.05801	10.798	6.04543	6.04543	1.31477	11.8473	0.0713841	-0.780109	NM_145246 // RefSeq // Homo sapiens chromosome 10 open reading frame 4 (C10orf4)	NM_145246
33	3415229	NM_002135 // RefSeq // Homo sapiens nuclear receptor subfamily 4, group A, membe	NM_002135 // Hs.524430 // trachea; uterus; brain; larynx; placenta; lymph; lung;	chr12	+	50717248	50739539	170	NM_002135 // NR4A1 // nuclear receptor subfamily 4, group A, member 1 // 12q13 /	0.0238083	0	2.49757e-09	0	6.35677	6.35677	2.14391	9.92752	7.49424	7.49424	2.04265	11.6728	0.0238083	-1.13747	NM_002135 // RefSeq // Homo sapiens nuclear receptor subfamily 4, group A, membe	NM_002135
12	2405284	NM_033504 // RefSeq // Homo sapiens transmembrane protein 54 (TMEM54), mRNA. //	NM_033504 // Hs.534521 // colon; brain; placenta; pancreas; kidney; mixed; uncha	chr1	-	33132792	33139606	55	NM_033504 // TMEM54 // transmembrane protein 54 // 1p35-p34 // 113452 /// BC0232	0.289336	0	1.49704e-08	3.96884e-37	6.70319	6.70319	0.940765	10.5785	7.09902	7.09902	1.07225	10.8289	0.289336	-0.395833	NM_033504 // RefSeq // Homo sapiens transmembrane protein 54 (TMEM54), mRNA. //	NM_033504
18	3347431	NM_018712 // RefSeq // Homo sapiens ELMO/CED-12 domain containing 1 (ELMOD1), mR	NM_018712 // Hs.495779 // brain; whole brain; eye; kidney; mammary gland; muscle	chr11	+	106967217	107045349	104	NM_018712 // ELMOD1 // ELMO/CED-12 domain containing 1 // 11q22.3 // 55531 /// A	0.535707	0	4.34304e-08	0	8.30807	8.30807	2.35066	10.5572	8.50769	8.50769	1.76777	11.155	0.535707	-0.199621	NM_018712 // RefSeq // Homo sapiens ELMO/CED-12 domain containing 1 (ELMOD1), mR	NM_018712
87	2389247	BC035896 // GenBank // Homo sapiens kinesin family member 26B, mRNA (cDNA clone	BC035896 // Hs.368096 // brain; lung; mammary gland; mixed; embryonic tissue; st	chr1	+	243384920	244084148	605	BC035896 // KIF26B // kinesin family member 26B // 1q44 // 55083 /// XM_371354 /	0.214198	0	1.15866e-06	0	4.99195	4.99195	1.04426	9.5672	5.35157	5.35157	0.950754	10.1325	0.214198	-0.359621	BC035896 // GenBank // Homo sapiens kinesin family member 26B, mRNA (cDNA clone	BC035896
16	3823681	NM_016270 // RefSeq // Homo sapiens Kruppel-like factor 2 (lung) (KLF2), mRNA. /	NM_016270 // Hs.107740 // uncharacterized tissue; lung; pancreas; mixed; kidney;	chr19	+	16296527	16300453	62	NM_016270 // KLF2 // Kruppel-like factor 2 (lung) // 19p13.13-p13.11 // 10365 //	0.0604774	0	1.27508e-06	9.14838e-34	6.81234	6.81234	1.75909	10.5672	7.39404	7.39404	3.18565	10.6972	0.0604774	-0.581703	NM_016270 // RefSeq // Homo sapiens Kruppel-like factor 2 (lung) (KLF2), mRNA. /	NM_016270
16	3814033	NM_001025094 // RefSeq // Homo sapiens myelin basic protein (MBP), transcript va	NM_001025094 // Hs.551713 // brain; kidney; skin; whole brain; uncharacterized t	chr18	-	72819784	72851032	108	NM_001025094 // MBP // myelin basic protein // 18q23 // 4155 /// NM_001025090 //	0.552494	0	1.58936e-06	0	10.448	10.448	6.63193	13.779	10.6599	10.6599	6.48135	14.0955	0.552494	-0.21192	NM_001025094 // RefSeq // Homo sapiens myelin basic protein (MBP), transcript va	NM_001025094
19	2950329	NM_033554 // RefSeq // Homo sapiens major histocompatibility complex, class II,	NM_033554 // Hs.347270 // lung; brain; mixed; pancreas; uterus; lymph node; phar	chr6	-	33140324	33156533	83	NM_033554 // HLA-DPA1 // major histocompatibility complex, class II, DP alpha 1	0.0137171	0	1.61024e-06	1.24699e-40	5.59548	5.59548	1.53544	9.60516	6.73322	6.73322	1.58042	10.2324	0.0137171	-1.13774	NM_033554 // RefSeq // Homo sapiens major histocompatibility complex, class II,	NM_033554
26	3927446	NM_006988 // RefSeq // Homo sapiens ADAM metallopeptidase with thrombospondin ty	NM_006988 // Hs.643357 // uterus; prostate; placenta; brain; uncharacterized tis	chr21	-	27129950	27141568	101	NM_006988 // ADAMTS1 // ADAM metallopeptidase with thrombospondin type 1 motif,	0.0421604	0	2.30031e-06	0	5.52566	5.52566	2.13678	8.42461	6.55492	6.55492	1.88791	10.3085	0.0421604	-1.02926	NM_006988 // RefSeq // Homo sapiens ADAM metallopeptidase with thrombospondin ty	NM_006988
53	3076899	ENST00000389113 // ENSEMBL Transcript // cdna:known chromosome:NCBI36:7:1415870	XR_018085 // Hs.641504 // mixed	chr7	-	141578530	142204864	404	XR_018085 // LOC642128 // similar to monooxygenase, DBH-like 2 // --- // 642128	0.238053	0	3.30969e-06	0	4.07497	4.07497	1.05527	7.5594	4.41042	4.41042	1.1087	8.15837	0.238053	-0.335453	ENST00000389113 // ENSEMBL Transcript // cdna:known chromosome:NCBI36:7:1415870	ENST00000389113
17	2975257	NM_170771 // RefSeq // Homo sapiens aldehyde dehydrogenase 8 family, member A1 (	NM_170771 // Hs.486520 // kidney; liver; mixed; brain; heart; esophagus; whole b	chr6	-	135280129	135312937	113	NM_170771 // ALDH8A1 // aldehyde dehydrogenase 8 family, member A1 // 6q23.2 //	0.111909	0	3.32944e-06	5.98302e-28	4.89284	4.89284	1.15263	8.72548	5.36205	5.36205	1.91811	8.80163	0.111909	-0.469213	NM_170771 // RefSeq // Homo sapiens aldehyde dehydrogenase 8 family, member A1 (	NM_170771
10	2430596	NM_002802 // RefSeq // Homo sapiens proteasome (prosome, macropain) 26S subunit,	NM_002802 // Hs.356654 // brain; lung; placenta; testis; blood; lymph node; cran	chr1	-	118832331	118959544	95	NM_002802 // PSMC1 // proteasome (prosome, macropain) 26S subunit, ATPase, 1 //	0.223077	5.60519e-45	4.21408e-06	2.12941e-16	3.5745	3.5745	1.04426	7.06728	3.92917	3.92917	1.95103	7.2934	0.223077	-0.354672	NM_002802 // RefSeq // Homo sapiens proteasome (prosome, macropain) 26S subunit,	NM_002802
30	3764103	NM_006924 // RefSeq // Homo sapiens splicing factor, arginine/serine-rich 1 (spl	NM_006924 // Hs.68714 // brain; testis; uncharacterized tissue; lymph node; uter	chr17	-	53421412	53439635	142	NM_006924 // SFRS1 // splicing factor, arginine/serine-rich 1 (splicing factor 2	0.292929	0	4.57032e-06	0	7.01063	7.01063	0.529786	11.2245	7.43374	7.43374	1.44764	11.5552	0.292929	-0.423112	NM_006924 // RefSeq // Homo sapiens splicing factor, arginine/serine-rich 1 (spl	NM_006924
30	3697683	NM_006961 // RefSeq // Homo sapiens zinc finger protein 19 (ZNF19), mRNA. // chr	XM_372643 // Hs.553771 // mixed /// XM_936477 // Hs.553771 // mixed /// L25346 /	chr16	-	70003600	70123357	153	NM_006961 // ZNF19 // zinc finger protein 19 // 16q22 // 7567 /// BC048974 // ZN	0.297164	0	4.60115e-06	0	4.18545	4.18545	0.689736	7.14255	4.51164	4.51164	0.906502	7.33026	0.297164	-0.326187	NM_006961 // RefSeq // Homo sapiens zinc finger protein 19 (ZNF19), mRNA. // chr	NM_006961
29	3829174	NM_018025 // RefSeq // Homo sapiens G patch domain containing 1 (GPATC1), mRNA.	NM_018025 // Hs.466436 // brain; colon; cranial nerve; lung; placenta; embryonic	chr19	+	38263626	38313701	119	NM_018025 // GPATCH1 // G patch domain containing 1 // 19q13.11 // 55094 /// AK0	0.373395	0	5.02481e-06	0	5.54207	5.54207	2.23937	9.28447	5.83308	5.83308	1.71266	9.70795	0.373395	-0.291012	NM_018025 // RefSeq // Homo sapiens G patch domain containing 1 (GPATC1), mRNA.	NM_018025
59	3968122	NM_005647 // RefSeq // Homo sapiens transducin (beta)-like 1X-linked (TBL1X), mR	NM_005647 // Hs.495656 // lung; mixed; brain; uterus; placenta; liver; lymph nod	chrX	+	9391379	9647778	537	NM_005647 // TBL1X // transducin (beta)-like 1X-linked // Xp22.3 // 6907 /// BC0	0.131992	0	5.41716e-06	0	5.09234	5.09234	1.04111	9.2882	5.57744	5.57744	1.42939	9.39997	0.131992	-0.485104	NM_005647 // RefSeq // Homo sapiens transducin (beta)-like 1X-linked (TBL1X), mR	NM_005647
40	3895552	NM_025220 // RefSeq // Homo sapiens ADAM metallopeptidase domain 33 (ADAM33), tr	NM_025220 // Hs.173716 // uterus; uncharacterized tissue; brain; testis; adipose	chr20	-	3596627	3611327	223	NM_025220 // ADAM33 // ADAM metallopeptidase domain 33 // 20p13 // 80332 /// NM_	0.225772	0	7.3315e-06	0	5.88742	5.88742	2.05263	10.5756	6.23176	6.23176	2.69721	10.767	0.225772	-0.344337	NM_025220 // RefSeq // Homo sapiens ADAM metallopeptidase domain 33 (ADAM33), tr	NM_025220
10	3332388	NM_023945 // RefSeq // Homo sapiens membrane-spanning 4-domains, subfamily A, me	NM_023945 // Hs.178066 // testis; thyroid; brain	chr11	+	59953638	59977651	40	NM_023945 // MS4A5 // membrane-spanning 4-domains, subfamily A, member 5 // 11q1	0.0699329	1.35479e-35	7.99038e-06	4.90998e-06	2.90591	2.90591	1.26606	6.00162	3.26355	3.26355	1.17974	6.30195	0.0699329	-0.357641	NM_023945 // RefSeq // Homo sapiens membrane-spanning 4-domains, subfamily A, me	NM_023945
32	2754494	XM_001128664 // RefSeq // PREDICTED: Homo sapiens hypothetical protein LOC728203	XM_001128664 // Hs.543335 // kidney; mixed	chr4	+	186133356	186179095	162	XM_001128664 // LOC728203 // hypothetical protein LOC728203 // 4q35.1 // 728203	0.344204	0	8.87228e-06	0	4.67934	4.67934	1.15263	9.52614	4.95362	4.95362	1.19236	9.80899	0.344204	-0.274279	XM_001128664 // RefSeq // PREDICTED: Homo sapiens hypothetical protein LOC728203	XM_001128664
61	3280573	NM_006393 // RefSeq // Homo sapiens nebulette (NEBL), transcript variant 1, mRNA	NM_006393 // Hs.5025 // brain; heart; lung; placenta; mammary gland; mixed; whol	chr10	-	21108908	21503112	482	NM_006393 // NEBL // nebulette // 10p12 // 10529 /// NM_213569 // NEBL // nebule	0.422659	0	8.94432e-06	0	6.22657	6.22657	0.843622	11.6823	6.5123	6.5123	0.907257	11.9233	0.422659	-0.28573	NM_006393 // RefSeq // Homo sapiens nebulette (NEBL), transcript variant 1, mRNA	NM_006393
10	3832978	NM_003407 // RefSeq // Homo sapiens zinc finger protein 36, C3H type, homolog (m	NM_003407 // Hs.534052 // uncharacterized tissue; pancreas; placenta; colon; bra	chr19	+	44589327	44592372	40	NM_003407 // ZFP36 // zinc finger protein 36, C3H type, homolog (mouse) // 19q13	0.065017	2.29907e-34	1.03524e-05	9.05627e-29	5.66441	5.66441	2.61829	7.71007	6.5488	6.5488	3.32945	9.20599	0.065017	-0.884392	NM_003407 // RefSeq // Homo sapiens zinc finger protein 36, C3H type, homolog (m	NM_003407
14	3835339	NM_006300 // RefSeq // Homo sapiens zinc finger protein 230 (ZNF230), mRNA. // c	NM_006300 // Hs.193583 // embryonic tissue; brain; muscle; vascular; testis; who	chr19	+	49198844	49209902	73	NM_006300 // ZNF230 // zinc finger protein 230 // 19q13.31 // 7773 /// BC030810	0.151237	3.79796e-39	1.19213e-05	2.7867e-20	3.98499	3.98499	0.925316	7.3598	4.46888	4.46888	1.64241	7.49943	0.151237	-0.483889	NM_006300 // RefSeq // Homo sapiens zinc finger protein 230 (ZNF230), mRNA. // c	NM_006300
45	2492783	AK095303 // GenBank // Homo sapiens cDNA FLJ37984 fis, clone CTONG2010652, weakl	AK095303 // Hs.516179 // brain; placenta; eye; testis; kidney; uterus; prostate;	chr2	+	88210799	88339060	286	AK095303 // FLJ10916 // hypothetical protein FLJ10916 // 2p11.2 // 55258 /// BC0	0.0852394	0	1.37594e-05	0	5.20418	5.20418	1.57867	9.76091	5.8496	5.8496	2.26226	10.1264	0.0852394	-0.645416	AK095303 // GenBank // Homo sapiens cDNA FLJ37984 fis, clone CTONG2010652, weakl	AK095303
13	4010646	NM_130388 // RefSeq // Homo sapiens ankyrin repeat and SOCS box-containing 12 (A	NM_130388 // Hs.56281 // muscle; heart; whole brain; testis; mixed	chrX	-	63341562	63367212	49	NM_130388 // ASB12 // ankyrin repeat and SOCS box-containing 12 // Xq11.1 // 142	0.125019	0	2.46742e-05	1.97784e-15	4.11301	4.11301	1.55026	6.89837	4.5118	4.5118	1.34698	7.66485	0.125019	-0.398788	NM_130388 // RefSeq // Homo sapiens ankyrin repeat and SOCS box-containing 12 (A	NM_130388
66	3980758	NM_005120 // RefSeq // Homo sapiens mediator of RNA polymerase II transcription,	NM_005120 // Hs.409226 // brain; uncharacterized tissue; testis; stomach; mammar	chrX	+	70254916	70279015	281	NM_005120 // MED12 // mediator of RNA polymerase II transcription, subunit 12 ho	0.16362	0	2.54485e-05	0	6.24013	6.24013	1.50859	9.51302	6.72627	6.72627	1.29219	10.0187	0.16362	-0.486139	NM_005120 // RefSeq // Homo sapiens mediator of RNA polymerase II transcription,	NM_005120
25	2980870	NM_015718 // RefSeq // Homo sapiens NADPH oxidase 3 (NOX3), mRNA. // chr6 // 100	NM_015718 // Hs.247776 // testis	chr6	-	155758194	155901903	184	NM_015718 // NOX3 // NADPH oxidase 3 // 6q25.1-q26 // 50508	0.162378	0	2.74309e-05	3.20993e-36	3.59552	3.59552	0.841935	7.56937	3.99723	3.99723	1.53477	8.23742	0.162378	-0.40171	NM_015718 // RefSeq // Homo sapiens NADPH oxidase 3 (NOX3), mRNA. // chr6 // 100	NM_015718
37	2409847	NM_003738 // RefSeq // Homo sapiens patched homolog 2 (Drosophila) (PTCH2), mRNA	NM_003738 // Hs.591497 // whole brain; testis; parathyroid; mammary gland; mixed	chr1	-	45057642	45081578	213	NM_003738 // PTCH2 // patched homolog 2 (Drosophila) // 1p33-p34 // 8643	0.166557	0	3.21466e-05	0	6.05262	6.05262	1.26581	10.1757	6.5149	6.5149	1.7417	9.52467	0.166557	-0.462282	NM_003738 // RefSeq // Homo sapiens patched homolog 2 (Drosophila) (PTCH2), mRNA	NM_003738
32	2881370	NM_001025159 // RefSeq // Homo sapiens CD74 molecule, major histocompatibility c	NM_001025159 // Hs.436568 // brain; tonsil; uncharacterized tissue; spleen; lung	chr5	-	149758323	149772736	150	NM_001025159 // CD74 // CD74 molecule, major histocompatibility complex, class I	0.0387799	0	3.35838e-05	0	5.98812	5.98812	2.35771	9.58725	6.80971	6.80971	3.14147	11.0439	0.0387799	-0.821584	NM_001025159 // RefSeq // Homo sapiens CD74 molecule, major histocompatibility c	NM_001025159
10	2651060	ENST00000331839 // ENSEMBL Transcript // Homo sapiens similar to heterochromatin	XR_017393 // Hs.647906 // placenta /// BC006329 // Hs.599039 // brain; vascular;	chr3	+	167726114	168157824	108	XR_017393 // LOC389173 // similar to phosphoserine aminotransferase isoform 1 //	0.153699	1.77096e-23	3.4777e-05	0.000705487	3.35596	3.35596	0.657323	5.22382	3.68041	3.68041	1.00914	5.94284	0.153699	-0.324443	ENST00000331839 // ENSEMBL Transcript // Homo sapiens similar to heterochromatin	ENST00000331839
9	2884647	ENST00000297150 // ENSEMBL Transcript // transposon-derived Buster3 transposase-	NM_022090 // Hs.529464 // whole brain; mixed; pancreas; lung; placenta; ovary; e	chr5	-	159752733	159759619	37	NM_022090 // LOC63920 // transposon-derived Buster3 transposase-like // 5q33.3 /	0.599749	1.16901e-32	3.91976e-05	3.19447e-26	5.01815	5.01815	2.43545	7.66318	5.22957	5.22957	2.36455	7.67735	0.599749	-0.211429	ENST00000297150 // ENSEMBL Transcript // transposon-derived Buster3 transposase-	ENST00000297150
58	2491386	NM_031283 // RefSeq // Homo sapiens transcription factor 7-like 1 (T-cell specif	NM_031283 // Hs.516297 // lung; mixed; mammary gland; embryonic tissue; brain; u	chr2	+	85157414	85397511	439	NM_031283 // TCF7L1 // transcription factor 7-like 1 (T-cell specific, HMG-box)	0.191552	0	4.21249e-05	0	5.20541	5.20541	1.39216	11.7628	5.61029	5.61029	1.97646	11.8787	0.191552	-0.404885	NM_031283 // RefSeq // Homo sapiens transcription factor 7-like 1 (T-cell specif	NM_031283
119	3198346	NM_130391 // RefSeq // Homo sapiens protein tyrosine phosphatase, receptor type,	NM_130391 // Hs.446083 // brain; uncharacterized tissue; whole brain; whole body	chr9	-	8251619	10820308	1162	NM_130391 // PTPRD // protein tyrosine phosphatase, receptor type, D // 9p23-p24	0.275237	0	4.25623e-05	0	6.38555	6.38555	0.961691	11.2447	6.7839	6.7839	1.0349	11.8867	0.275237	-0.398352	NM_130391 // RefSeq // Homo sapiens protein tyrosine phosphatase, receptor type,	NM_130391
67	3017547	NM_182931 // RefSeq // Homo sapiens myeloid/lymphoid or mixed-lineage leukemia 5	NM_182931 // Hs.592262 // brain; mammary gland; lung; mixed; uncharacterized tis	chr7	+	104436029	104542698	394	NM_182931 // MLL5 // myeloid/lymphoid or mixed-lineage leukemia 5 (trithorax hom	0.441623	0	4.35392e-05	0	6.58603	6.58603	0.841935	11.7144	6.86299	6.86299	1.23181	12.1512	0.441623	-0.276954	NM_182931 // RefSeq // Homo sapiens myeloid/lymphoid or mixed-lineage leukemia 5	NM_182931
51	3409211	NM_003622 // RefSeq // Homo sapiens PTPRF interacting protein, binding protein 1	NM_003622 // Hs.172445 // brain; uncharacterized tissue; liver; vascular; embryo	chr12	+	27567649	27739981	331	NM_003622 // PPFIBP1 // PTPRF interacting protein, binding protein 1 (liprin bet	0.417523	0	4.7037e-05	0	6.12461	6.12461	1.49115	10.1569	6.41774	6.41774	1.12047	10.1372	0.417523	-0.293137	NM_003622 // RefSeq // Homo sapiens PTPRF interacting protein, binding protein 1	NM_003622
20	2446447	NM_032360 // RefSeq // Homo sapiens acyl-Coenzyme A binding domain containing 6	NM_032360 // Hs.200051 // brain; uncharacterized tissue; lung; blood; testis; ki	chr1	-	178512179	178738692	226	NM_032360 // ACBD6 // acyl-Coenzyme A binding domain containing 6 // 1q25.2-q25.	0.28699	0	4.84751e-05	2.59518e-39	5.31932	5.31932	1.36786	9.32434	5.69576	5.69576	1.46584	9.5866	0.28699	-0.376438	NM_032360 // RefSeq // Homo sapiens acyl-Coenzyme A binding domain containing 6	NM_032360
24	3740998	NM_018128 // RefSeq // Homo sapiens TSR1, 20S rRNA accumulation, homolog (S. cer	NM_018128 // Hs.388170 // brain; testis; mixed; whole body; muscle; uncharacteri	chr17	-	2172438	2187551	112	NM_018128 // TSR1 // TSR1, 20S rRNA accumulation, homolog (S. cerevisiae) // 17p	0.495688	0	6.37133e-05	0	6.25467	6.25467	2.17256	9.21291	6.47869	6.47869	1.40971	9.70122	0.495688	-0.224014	NM_018128 // RefSeq // Homo sapiens TSR1, 20S rRNA accumulation, homolog (S. cer	NM_018128
25	3470037	NM_012406 // RefSeq // Homo sapiens PR domain containing 4 (PRDM4), mRNA. // chr	NM_012406 // Hs.506655 // mixed; uncharacterized tissue; brain; lung; pancreas;	chr12	-	106650784	106679235	137	NM_012406 // PRDM4 // PR domain containing 4 // 12q23-q24.1 // 11108 /// BC06856	0.23443	0	6.99724e-05	0	6.51755	6.51755	1.24288	9.95265	6.93194	6.93194	1.15781	10.2863	0.23443	-0.414389	NM_012406 // RefSeq // Homo sapiens PR domain containing 4 (PRDM4), mRNA. // chr	NM_012406
29	2642720	NM_001099 // RefSeq // Homo sapiens acid phosphatase, prostate (ACPP), mRNA. //	NM_001099 // Hs.433060 // prostate; mammary gland; uncharacterized tissue; muscl	chr3	+	133452342	133590574	197	NM_001099 // ACPP // acid phosphatase, prostate // 3q21-q23 // 55 /// BC007460 /	0.126343	0	7.1365e-05	4.23859e-39	3.53925	3.53925	1.10653	6.48494	3.95072	3.95072	1.06289	6.53476	0.126343	-0.41147	NM_001099 // RefSeq // Homo sapiens acid phosphatase, prostate (ACPP), mRNA. //	NM_001099
70	2984275	NM_006661 // RefSeq // Homo sapiens phosphodiesterase 10A (PDE10A), mRNA. // chr	NM_006661 // Hs.584856 // whole brain; brain; embryonic tissue; small intestine;	chr6	-	165651157	166321582	594	NM_006661 // PDE10A // phosphodiesterase 10A // 6q26 // 10846 /// XR_017929 // C	0.635362	0	7.52069e-05	0	5.64302	5.64302	1.04786	8.71059	5.75771	5.75771	1.16076	8.96463	0.635362	-0.114693	NM_006661 // RefSeq // Homo sapiens phosphodiesterase 10A (PDE10A), mRNA. // chr	NM_006661
76	2480168	NM_005400 // RefSeq // Homo sapiens protein kinase C, epsilon (PRKCE), mRNA. //	NM_005400 // Hs.580351 // brain; placenta; whole brain; testis; uterus; colon; m	chr2	+	45731934	46343070	689	NM_005400 // PRKCE // protein kinase C, epsilon // 2p21 // 5581 /// AK128749 //	0.186404	0	7.68459e-05	0	5.9222	5.9222	1.24288	11.3916	6.35709	6.35709	1.13785	11.7025	0.186404	-0.434891	NM_005400 // RefSeq // Homo sapiens protein kinase C, epsilon (PRKCE), mRNA. //	NM_005400
41	3397877	NM_014715 // RefSeq // Homo sapiens Rho GTPase-activating protein (RICS), mRNA.	NM_014715 // Hs.440379 // brain; colon; kidney; embryonic tissue; whole brain; e	chr11	-	128343040	128567297	240	NM_014715 // RICS // Rho GTPase-activating protein // 11q24-q25 // 9743 /// AB07	0.300756	0	7.77231e-05	0	7.5246	7.5246	1.09907	11.5512	7.94019	7.94019	1.07225	12.5132	0.300756	-0.415597	NM_014715 // RefSeq // Homo sapiens Rho GTPase-activating protein (RICS), mRNA.	NM_014715
81	3187577	NM_007018 // RefSeq // Homo sapiens centrosomal protein 110kDa (CEP110), mRNA. /	NM_007018 // Hs.648178 // lymph node; testis; uncharacterized tissue; liver; pla	chr9	+	122876699	123014638	423	NM_007018 // CEP110 // centrosomal protein 110kDa // 9q33-q34 // 11064 /// AF083	0.363704	0	8.40595e-05	0	4.56324	4.56324	0.952393	8.18493	4.85268	4.85268	1.62667	8.7154	0.363704	-0.289447	NM_007018 // RefSeq // Homo sapiens centrosomal protein 110kDa (CEP110), mRNA. /	NM_007018
58	3292169	NM_013266 // RefSeq // Homo sapiens catenin (cadherin-associated protein), alpha	NM_013266 // Hs.325275 // brain; connective tissue; testis; kidney; uterus; stom	chr10	-	67349746	69125923	697	NM_013266 // CTNNA3 // catenin (cadherin-associated protein), alpha 3 // 10q22.2	0.501967	0	9.158e-05	0	4.45585	4.45585	0.57106	8.51348	4.67916	4.67916	1.00679	10.1319	0.501967	-0.223307	NM_013266 // RefSeq // Homo sapiens catenin (cadherin-associated protein), alpha	NM_013266
27	2344888	NM_001554 // RefSeq // Homo sapiens cysteine-rich, angiogenic inducer, 61 (CYR61	NM_001554 // Hs.8867 // brain; uncharacterized tissue; uterus; connective tissue	chr1	+	85816676	85867516	122	NM_001554 // CYR61 // cysteine-rich, angiogenic inducer, 61 // 1p31-p22 // 3491	0.0483616	0	0.000108431	0	5.07466	5.07466	1.30731	8.12574	5.73203	5.73203	1.5286	9.65274	0.0483616	-0.657374	NM_001554 // RefSeq // Homo sapiens cysteine-rich, angiogenic inducer, 61 (CYR61	NM_001554
31	3886704	NM_006282 // RefSeq // Homo sapiens serine/threonine kinase 4 (STK4), mRNA. // c	NM_006282 // Hs.472838 // uncharacterized tissue; lymph node; brain; blood; lung	chr20	+	43028534	43142041	163	NM_006282 // STK4 // serine/threonine kinase 4 // 20q11.2-q13.2 // 6789 /// Z254	0.33756	0	0.000115987	0	5.48647	5.48647	0.747535	11.7512	5.81255	5.81255	1.15199	12.067	0.33756	-0.326081	NM_006282 // RefSeq // Homo sapiens serine/threonine kinase 4 (STK4), mRNA. // c	NM_006282
33	3074577	NM_205855 // RefSeq // Homo sapiens HWKM1940 (UNQ1940), mRNA. // chr7 // 100 //	NM_205855 // Hs.55200 // connective tissue; uncharacterized tissue; skin; vascul	chr7	-	135064899	135134865	182	NM_205855 // UNQ1940 // HWKM1940 // 7q33 // 389558	0.322725	0	0.00012554	0	4.23076	4.23076	1.44914	7.60552	4.49705	4.49705	1.00914	8.05578	0.322725	-0.266293	NM_205855 // RefSeq // Homo sapiens HWKM1940 (UNQ1940), mRNA. // chr7 // 100 //	NM_205855
125	3000984	NM_152701 // RefSeq // Homo sapiens ATP-binding cassette, sub-family A (ABC1), m	NM_152701 // Hs.226568 // blood; uncharacterized tissue; trachea; thyroid; kidne	chr7	+	48208391	48671096	648	NM_152701 // ABCA13 // ATP-binding cassette, sub-family A (ABC1), member 13 // 7	0.18462	0	0.000137268	0	3.74632	3.74632	1.04728	8.38864	4.0962	4.0962	0.871403	8.85896	0.18462	-0.349882	NM_152701 // RefSeq // Homo sapiens ATP-binding cassette, sub-family A (ABC1), m	NM_152701
64	2719481	BC070395 // GenBank // Homo sapiens cDNA clone IMAGE:6559700. // chr4 // 100 //	BC070395 // Hs.590928 // brain; whole brain; mammary gland; muscle; lung; testis	chr4	+	15068197	15212805	333	BC070395 // KIAA1345 // KIAA1345 protein // 4p15.33 // 57545 /// BC053865 // KIA	0.293263	0	0.000141124	0	4.7675	4.7675	0.841935	8.29211	5.08492	5.08492	0.871403	8.27851	0.293263	-0.317424	BC070395 // GenBank // Homo sapiens cDNA clone IMAGE:6559700. // chr4 // 100 //	BC070395
29	3754736	NM_152300 // RefSeq // Homo sapiens DEAD (Asp-Glu-Ala-Asp) box polypeptide 52 (D	NM_152300 // Hs.590937 // testis; uncharacterized tissue; muscle; stomach; prost	chr17	-	33043910	33077600	132	NM_152300 // DDX52 // DEAD (Asp-Glu-Ala-Asp) box polypeptide 52 // 17q21.1 // 11	0.442312	0	0.000142831	0	5.22991	5.22991	0.747535	8.4346	5.48328	5.48328	1.1087	8.73748	0.442312	-0.253363	NM_152300 // RefSeq // Homo sapiens DEAD (Asp-Glu-Ala-Asp) box polypeptide 52 (D	NM_152300
40	3852407	NM_002918 // RefSeq // Homo sapiens regulatory factor X, 1 (influences HLA class	NM_002918 // Hs.73677 // uncharacterized tissue; brain; lung; uterus; kidney; wh	chr19	-	13932369	13978101	193	NM_002918 // RFX1 // regulatory factor X, 1 (influences HLA class II expression)	0.168926	0	0.000143075	0	6.03014	6.03014	2.9608	9.0667	6.4529	6.4529	2.66304	9.45603	0.168926	-0.422755	NM_002918 // RefSeq // Homo sapiens regulatory factor X, 1 (influences HLA class	NM_002918
27	2906105	NM_002062 // RefSeq // Homo sapiens glucagon-like peptide 1 receptor (GLP1R), mR	NM_002062 // Hs.389103 // kidney; brain; skin; testis; pancreas; uncharacterized	chr6	+	39124484	39181493	177	NM_002062 // GLP1R // glucagon-like peptide 1 receptor // 6p21 // 2740 /// U1003	0.316826	0	0.000169926	0	5.13985	5.13985	0.878213	9.08464	5.44124	5.44124	1.55139	9.23266	0.316826	-0.301384	NM_002062 // RefSeq // Homo sapiens glucagon-like peptide 1 receptor (GLP1R), mR	NM_002062
18	2372781	NM_002922 // RefSeq // Homo sapiens regulator of G-protein signalling 1 (RGS1),	NM_002922 // Hs.75256 // brain; trachea; uncharacterized tissue; mixed; kidney;	chr1	+	190770596	190815773	73	NM_002922 // RGS1 // regulator of G-protein signalling 1 // 1q31 // 5996 /// BC0	0.0620325	3.90505e-40	0.000176999	1.54319e-32	3.59991	3.59991	1.01041	6.9422	4.68427	4.68427	1.31123	10.3114	0.0620325	-1.08436	NM_002922 // RefSeq // Homo sapiens regulator of G-protein signalling 1 (RGS1),	NM_002922
3	2679214	NM_181510 // RefSeq // Homo sapiens WAP four-disulfide core domain 8 (WFDC8), tr	NM_181510 // Hs.116128 // testis; mixed	chr3	-	61745270	61762011	35	NM_181510 // WFDC8 // WAP four-disulfide core domain 8 // 20q13.12 // 90199	0.755459	5.86801e-12	0.000180636	0.0032866	4.2861	4.2861	3.20449	5.94723	4.20806	4.20806	1.83742	6.39122	0.755459	0.078039	NM_181510 // RefSeq // Homo sapiens WAP four-disulfide core domain 8 (WFDC8), tr	NM_181510
4	3083647	NM_053053 // RefSeq // Homo sapiens transcriptional adaptor 1 (HFI1 homolog, yea	NM_053053 // Hs.435967 // brain; adrenal gland; testis; pancreas; mixed; heart;	chr8	+	5694051	5694629	19	NM_053053 // TADA1L // transcriptional adaptor 1 (HFI1 homolog, yeast)-like // 1	0.586033	6.03174e-15	0.000194494	0.000384175	4.18641	4.18641	1.54432	7.91848	3.97869	3.97869	1.4104	6.34384	0.586033	0.207721	NM_053053 // RefSeq // Homo sapiens transcriptional adaptor 1 (HFI1 homolog, yea	NM_053053
17	3335697	NM_001335 // RefSeq // Homo sapiens cathepsin W (lymphopain) (CTSW), mRNA. // ch	NM_001335 // Hs.416848 // blood; uncharacterized tissue; mixed; placenta; uterus	chr11	+	65403860	65407967	68	NM_001335 // CTSW // cathepsin W // 11q13.1 // 1521 /// CR621885 // CTSW // cath	0.333436	0	0.000208542	8.21097e-21	5.18711	5.18711	1.04426	10.4229	5.47774	5.47774	1.56135	10.9369	0.333436	-0.290635	NM_001335 // RefSeq // Homo sapiens cathepsin W (lymphopain) (CTSW), mRNA. // ch	NM_001335
25	3905332	NR_002910 // RefSeq // Homo sapiens small nucleolar RNA, H/ACA box 71B (SNORA71B	AK022745 // Hs.400876 // whole brain; other; spleen; bone marrow; connective tis	chr20	-	36464437	36497410	148	NR_002910 // SNORA71B // small nucleolar RNA, H/ACA box 71B // 20q11.23 // 26776	0.112843	0	0.000232586	0	5.20458	5.20458	1.66734	9.43449	5.77951	5.77951	1.21674	10.0902	0.112843	-0.57493	NR_002910 // RefSeq // Homo sapiens small nucleolar RNA, H/ACA box 71B (SNORA71B	NR_002910
31	2365265	XR_017247 // RefSeq // PREDICTED: Homo sapiens similar to ribosomal protein S3a	XR_017247 // Hs.647716 // ---	chr1	+	164258076	164396061	188	XR_017247 // LOC401975 // similar to ribosomal protein S3a // 1q24.1 // 401975	0.401819	0	0.000239552	1.44474e-42	4.02511	4.02511	1.4519	7.03012	4.23785	4.23785	0.906502	7.67973	0.401819	-0.212743	XR_017247 // RefSeq // PREDICTED: Homo sapiens similar to ribosomal protein S3a	XR_017247
79	3795045	NM_198531 // RefSeq // Homo sapiens ATPase, Class II, type 9B (ATP9B), mRNA. //	NM_198531 // Hs.465475 // prostate; testis; uncharacterized tissue; whole brain;	chr18	+	74902324	75249970	481	NM_198531 // ATP9B // ATPase, Class II, type 9B // 18q23 // 374868 /// BX537860	0.231731	0	0.000241071	0	5.75561	5.75561	1.17141	10.0685	6.1493	6.1493	1.2292	9.98593	0.231731	-0.39369	NM_198531 // RefSeq // Homo sapiens ATPase, Class II, type 9B (ATP9B), mRNA. //	NM_198531
50	3487095	NM_178009 // RefSeq // Homo sapiens diacylglycerol kinase, eta (DGKH), transcrip	NM_178009 // Hs.326475 // brain; placenta; lung; mixed; pancreas; prostate; ovar	chr13	+	41520931	41715026	350	NM_178009 // DGKH // diacylglycerol kinase, eta // 13q14.11 // 160851 /// NM_152	0.439963	0	0.000248859	0	5.91062	5.91062	0.948742	9.85794	6.1461	6.1461	1.07464	9.91862	0.439963	-0.235486	NM_178009 // RefSeq // Homo sapiens diacylglycerol kinase, eta (DGKH), transcrip	NM_178009
6	3273976	AK097474 // GenBank // Homo sapiens cDNA FLJ40155 fis, clone TESTI2014362. // ch	AK097474 // Hs.576810 // testis	chr10	-	2037677	2046532	24	AK097474 // LOC282980 // hypothetical protein LOC282980 // 10p15.3 // 282980	0.484683	1.54647e-33	0.000253608	9.59483e-16	4.0314	4.0314	1.56437	6.67577	4.28121	4.28121	0.7498	7.00373	0.484683	-0.24981	AK097474 // GenBank // Homo sapiens cDNA FLJ40155 fis, clone TESTI2014362. // ch	AK097474
11	3854477	NM_138454 // RefSeq // Homo sapiens thioredoxin-like 6 (TXNL6), mRNA. // chr19 /	NM_138454 // Hs.515667 // eye; mixed; testis; brain; mammary gland; heart; crani	chr19	-	17408267	17432725	78	NM_138454 // TXNL6 // thioredoxin-like 6 // 19p13.11 // 115861 /// DQ426894 // T	0.21618	0	0.000255136	1.32789e-22	6.20893	6.20893	1.99141	10.2605	6.61111	6.61111	2.99359	10.7712	0.21618	-0.402185	NM_138454 // RefSeq // Homo sapiens thioredoxin-like 6 (TXNL6), mRNA. // chr19 /	NM_138454
87	3119017	NM_001702 // RefSeq // Homo sapiens brain-specific angiogenesis inhibitor 1 (BAI	NM_001702 // Hs.194654 // brain; mammary gland; testis; whole brain; larynx; unc	chr8	+	143452688	143623369	378	NM_001702 // BAI1 // brain-specific angiogenesis inhibitor 1 // 8q24 // 575 ///	0.145044	0	0.000255582	0	6.74077	6.74077	1.27831	10.978	7.19219	7.19219	1.39052	11.3598	0.145044	-0.451423	NM_001702 // RefSeq // Homo sapiens brain-specific angiogenesis inhibitor 1 (BAI	NM_001702
10	2354553	NM_000862 // RefSeq // Homo sapiens hydroxy-delta-5-steroid dehydrogenase, 3 bet	NM_000862 // Hs.364941 // adrenal gland; placenta; mixed; embryonic tissue; bloo	chr1	+	119851369	119859195	64	NM_000862 // HSD3B1 // hydroxy-delta-5-steroid dehydrogenase, 3 beta- and steroi	0.306509	0	0.000277942	7.31417e-13	4.16269	4.16269	1.74924	7.29293	4.44944	4.44944	1.61216	8.04616	0.306509	-0.286749	NM_000862 // RefSeq // Homo sapiens hydroxy-delta-5-steroid dehydrogenase, 3 bet	NM_000862
37	3283991	NM_004521 // RefSeq // Homo sapiens kinesin family member 5B (KIF5B), mRNA. // c	NM_004521 // Hs.591373 // brain; colon; testis; mammary gland; embryonic tissue;	chr10	-	32337798	32385342	176	NM_004521 // KIF5B // kinesin family member 5B // 10pter-q22.1 // 3799	0.855177	0	0.000281977	0	6.81345	6.81345	1.39216	11.5362	6.7545	6.7545	0.938179	11.7344	0.855177	0.0589404	NM_004521 // RefSeq // Homo sapiens kinesin family member 5B (KIF5B), mRNA. // c	NM_004521
9	2551726	XM_001132314 // RefSeq // PREDICTED: Homo sapiens hypothetical protein LOC730078	XM_001132314 // Hs.633029 // stomach; brain; whole brain; spleen; eye; mixed; co	chr2	-	46734808	46780495	48	XM_001132314 // LOC730078 // hypothetical protein LOC730078 // 2p21 // 730078 //	0.500858	1.12505e-33	0.000298261	1.34608e-11	4.13768	4.13768	1.80829	6.91148	4.32505	4.32505	2.07111	7.83587	0.500858	-0.187368	XM_001132314 // RefSeq // PREDICTED: Homo sapiens hypothetical protein LOC730078	XM_001132314
34	3766796	NM_000442 // RefSeq // Homo sapiens platelet/endothelial cell adhesion molecule	NM_000442 // Hs.514412 // placenta; lung; mixed; brain; uncharacterized tissue;	chr17	-	59739784	59840630	223	NM_000442 // PECAM1 // platelet/endothelial cell adhesion molecule (CD31 antigen	0.250757	0	0.000316657	0	5.35459	5.35459	1.30029	9.07674	5.75729	5.75729	1.24933	9.48067	0.250757	-0.402701	NM_000442 // RefSeq // Homo sapiens platelet/endothelial cell adhesion molecule	NM_000442
23	3776139	NM_006101 // RefSeq // Homo sapiens kinetochore associated 2 (KNTC2), mRNA. // c	NM_006101 // Hs.414407 // brain; embryonic tissue; uncharacterized tissue; place	chr18	+	2558386	2606629	118	NM_006101 // KNTC2 // kinetochore associated 2 // 18p11.32 // 10403 /// BC005239	0.114338	0	0.000319112	1.41809e-26	2.97431	2.97431	0.874562	6.10213	3.30326	3.30326	1.09482	7.05919	0.114338	-0.32895	NM_006101 // RefSeq // Homo sapiens kinetochore associated 2 (KNTC2), mRNA. // c	NM_006101
4	3201319	NM_000605 // RefSeq // Homo sapiens interferon, alpha 2 (IFNA2), mRNA. // chr9 /	NM_000605 // Hs.211575 // --- /// AY255838 // Hs.211575 // --- /// NM_024013 //	chr9	-	21374254	21375396	18	NM_000605 // IFNA2 // interferon, alpha 2 // 9p22 // 3440 /// AY255838 // IFNA2	0.67984	6.17537e-16	0.000328129	0.00108325	4.52315	4.52315	2.05333	7.61424	4.68383	4.68383	1.17974	8.12206	0.67984	-0.160687	NM_000605 // RefSeq // Homo sapiens interferon, alpha 2 (IFNA2), mRNA. // chr9 /	NM_000605
14	3924518	NR_002776 // RefSeq // Homo sapiens MCM3 minichromosome maintenance deficient 3	NR_002776 // Hs.552029 // brain; mixed; pancreas; uncharacterized tissue; testis	chr21	+	46473573	46497183	75	NR_002776 // MCM3APAS // MCM3 minichromosome maintenance deficient 3 (S. cerevis	0.189612	0	0.000332963	5.63175e-18	4.70166	4.70166	1.6099	8.48149	5.07053	5.07053	1.38435	9.05083	0.189612	-0.368864	NR_002776 // RefSeq // Homo sapiens MCM3 minichromosome maintenance deficient 3	NR_002776
41	3319352	NM_177972 // RefSeq // Homo sapiens tubby homolog (mouse) (TUB), transcript vari	NM_177972 // Hs.568986 // brain; uncharacterized tissue; muscle; stomach; kidney	chr11	+	7997318	8117902	195	NM_177972 // TUB // tubby homolog (mouse) // 11p15.5 // 7275 /// NM_003320 // TU	0.23574	0	0.000340121	0	6.4228	6.4228	1.02675	10.1395	6.79903	6.79903	1.11917	10.5513	0.23574	-0.376227	NM_177972 // RefSeq // Homo sapiens tubby homolog (mouse) (TUB), transcript vari	NM_177972
32	3181976	NM_173200 // RefSeq // Homo sapiens nuclear receptor subfamily 4, group A, membe	NM_173200 // Hs.279522 // liver; muscle; testis; adrenal gland; uncharacterized	chr9	+	101623410	101669157	148	NM_173200 // NR4A3 // nuclear receptor subfamily 4, group A, member 3 // 9q22 //	0.096081	0	0.000342095	0	5.24035	5.24035	0.57106	8.60276	5.8889	5.8889	0.969542	10.1848	0.096081	-0.648547	NM_173200 // RefSeq // Homo sapiens nuclear receptor subfamily 4, group A, membe	NM_173200
16	2361731	NM_005973 // RefSeq // Homo sapiens papillary renal cell carcinoma (translocatio	NM_005973 // Hs.516948 // brain; uncharacterized tissue; lung; eye; skin; uterus	chr1	+	154987093	155037201	95	NM_005973 // PRCC // papillary renal cell carcinoma (translocation-associated) /	0.235568	0	0.000342612	0	6.68736	6.68736	2.23696	10.6671	7.13891	7.13891	2.29063	11.222	0.235568	-0.451551	NM_005973 // RefSeq // Homo sapiens papillary renal cell carcinoma (translocatio	NM_005973
5	3863079	NM_198540 // RefSeq // Homo sapiens UDP-GlcNAc:betaGal beta-1,3-N-acetylglucosam	NM_198540 // Hs.441681 // colon; uncharacterized tissue; connective tissue; bone	chr19	-	46623105	46626475	28	NM_198540 // B3GNT8 // UDP-GlcNAc:betaGal beta-1,3-N-acetylglucosaminyltransfera	0.833445	2.82225e-30	0.000383698	1.1267e-11	5.56736	5.56736	3.27011	7.78482	5.62817	5.62817	2.43795	8.14401	0.833445	-0.060814	NM_198540 // RefSeq // Homo sapiens UDP-GlcNAc:betaGal beta-1,3-N-acetylglucosam	NM_198540
5	3851493	NM_005815 // RefSeq // Homo sapiens zinc finger protein 443 (ZNF443), mRNA. // c	NM_005815 // Hs.631623 // colon; mammary gland; prostate; brain; skin; whole bra	chr19	-	12400957	12412872	52	NM_005815 // ZNF443 // zinc finger protein 443 // 19p13.2 // 10224	0.107889	3.03817e-27	0.000386939	6.71026e-06	4.03335	4.03335	1.13137	7.07428	4.55621	4.55621	1.08954	7.65862	0.107889	-0.522864	NM_005815 // RefSeq // Homo sapiens zinc finger protein 443 (ZNF443), mRNA. // c	NM_005815
80	3924573	NM_006031 // RefSeq // Homo sapiens pericentrin (kendrin) (PCNT), mRNA. // chr21	NM_006031 // Hs.474069 // brain; uncharacterized tissue; testis; embryonic tissu	chr21	+	46566650	46690195	387	NM_006031 // PCNT // pericentrin (kendrin) // 21q22.3 // 5116 /// AB007862 // PC	0.166518	0	0.000388939	0	6.00104	6.00104	1.19297	9.46914	6.44027	6.44027	0.948381	9.70691	0.166518	-0.439233	NM_006031 // RefSeq // Homo sapiens pericentrin (kendrin) (PCNT), mRNA. // chr21	NM_006031
8	2933522	NM_207118 // RefSeq // Homo sapiens general transcription factor IIH, polypeptid	NM_207118 // Hs.356224 // mixed; connective tissue; adrenal gland; bone; thyroid	chr6	+	158509351	158535008	28	NM_207118 // GTF2H5 // general transcription factor IIH, polypeptide 5 // 6q25.3	0.989287	1.13505e-42	0.000419091	4.61075e-08	6.45331	6.45331	2.04805	10.4489	6.44858	6.44858	1.59845	10.6604	0.989287	0.00472212	NM_207118 // RefSeq // Homo sapiens general transcription factor IIH, polypeptid	NM_207118
23	2877639	NM_001037633 // RefSeq // Homo sapiens SIL1 homolog, endoplasmic reticulum chape	NM_001037633 // Hs.483521 // placenta; lung; brain; skin; liver; prostate; uncha	chr5	-	138305201	138561966	257	NM_001037633 // SIL1 // SIL1 homolog, endoplasmic reticulum chaperone (S. cerevi	0.378577	0	0.000426568	0	5.4008	5.4008	1.48052	8.24504	5.68843	5.68843	1.0728	8.64306	0.378577	-0.287622	NM_001037633 // RefSeq // Homo sapiens SIL1 homolog, endoplasmic reticulum chape	NM_001037633
12	3381843	NM_003356 // RefSeq // Homo sapiens uncoupling protein 3 (mitochondrial, proton	NM_003356 // Hs.101337 // muscle; uncharacterized tissue; lung; mammary gland; t	chr11	-	73388686	73397778	57	NM_003356 // UCP3 // uncoupling protein 3 (mitochondrial, proton carrier) // 11q	0.144108	0	0.000427385	1.17505e-23	5.01141	5.01141	1.8899	8.27747	5.48603	5.48603	3.38079	8.87244	0.144108	-0.47462	NM_003356 // RefSeq // Homo sapiens uncoupling protein 3 (mitochondrial, proton	NM_003356
53	3645253	NM_016333 // RefSeq // Homo sapiens serine/arginine repetitive matrix 2 (SRRM2),	NM_016333 // Hs.433343 // brain; colon; lung; uncharacterized tissue; prostate;	chr16	+	2742650	2761908	233	NM_016333 // SRRM2 // serine/arginine repetitive matrix 2 // 16p13.3 // 23524 //	0.183599	0	0.000438498	0	7.67842	7.67842	1.09907	11.5538	8.20241	8.20241	0.808505	12.2185	0.183599	-0.52399	NM_016333 // RefSeq // Homo sapiens serine/arginine repetitive matrix 2 (SRRM2),	NM_016333
71	2448232	NM_003292 // RefSeq // Homo sapiens translocated promoter region (to activated M	NM_003292 // Hs.279640 // brain; uncharacterized tissue; larynx; pharynx; embryo	chr1	-	184547427	184611485	340	NM_003292 // TPR // translocated promoter region (to activated MET oncogene) //	0.754391	0	0.000439925	0	6.07895	6.07895	0.841935	10.1206	6.1769	6.1769	0.876182	10.304	0.754391	-0.097948	NM_003292 // RefSeq // Homo sapiens translocated promoter region (to activated M	NM_003292
55	3946615	NM_001429 // RefSeq // Homo sapiens E1A binding protein p300 (EP300), mRNA. // c	NM_001429 // Hs.517517 // brain; mixed; placenta; embryonic tissue; blood; mamma	chr22	+	39817736	39906025	296	NM_001429 // EP300 // E1A binding protein p300 // 22q13.2 // 2033 /// U01877 //	0.238526	0	0.000480584	0	6.90791	6.90791	1.64247	9.70716	7.31199	7.31199	1.316	10.2363	0.238526	-0.404078	NM_001429 // RefSeq // Homo sapiens E1A binding protein p300 (EP300), mRNA. // c	NM_001429
10	2867836	NM_002064 // RefSeq // Homo sapiens glutaredoxin (thioltransferase) (GLRX), mRNA	NM_002064 // Hs.28988 // placenta; brain; mixed; skin; kidney; cranial nerve; li	chr5	-	95142806	95184445	77	NM_002064 // GLRX // glutaredoxin (thioltransferase) // 5q14 // 2745 /// BC10607	0.778814	5.52502e-34	0.000487416	1.22033e-14	4.59579	4.59579	1.87676	7.11492	4.4952	4.4952	1.47006	8.19348	0.778814	0.100592	NM_002064 // RefSeq // Homo sapiens glutaredoxin (thioltransferase) (GLRX), mRNA	NM_002064
4	2644943	GENSCAN00000013600 // ENSEMBL Prediction // cdna:Genscan chromosome:NCBI36:3:14	BC021036 // Hs.514581 // brain; skin; lung; embryonic tissue; uterus; eye; whole	chr3	+	140695347	140696476	30	BC021036 // ACTG1 // actin, gamma 1 // 17q25 // 71 /// XM_001130062 // LOC728378	0.133547	2.20135e-13	0.000489063	1.80025e-07	5.73117	5.73117	2.69072	7.99783	6.40932	6.40932	4.1962	8.56542	0.133547	-0.678156	GENSCAN00000013600 // ENSEMBL Prediction // cdna:Genscan chromosome:NCBI36:3:14	GENSCAN00000013600
28	3225952	NM_001035534 // RefSeq // Homo sapiens chromosome 9 open reading frame 88 (C9orf	NM_001035534 // Hs.522401 // lung; placenta; prostate; skin; uterus; embryonic t	chr9	-	129307482	129381089	140	NM_001035534 // FAM129B // family with sequence similarity 129, member B // 9q34	0.145646	0	0.000501735	0	5.85269	5.85269	1.73795	10.1973	6.37829	6.37829	1.74677	10.311	0.145646	-0.525598	NM_001035534 // RefSeq // Homo sapiens chromosome 9 open reading frame 88 (C9orf	NM_001035534
24	3023350	NM_005631 // RefSeq // Homo sapiens smoothened homolog (Drosophila) (SMO), mRNA.	NM_005631 // Hs.437846 // uncharacterized tissue; embryonic tissue; brain; uteru	chr7	+	128614775	128640617	119	NM_005631 // SMO // smoothened homolog (Drosophila) // 7q32.3 // 6608 /// BC0043	0.193623	0	0.000502686	0	6.04467	6.04467	2.47398	10.6183	6.43396	6.43396	2.72256	10.7284	0.193623	-0.389286	NM_005631 // RefSeq // Homo sapiens smoothened homolog (Drosophila) (SMO), mRNA.	NM_005631
97	3185976	NM_032888 // RefSeq // Homo sapiens collagen, type XXVII, alpha 1 (COL27A1), mRN	NM_032888 // Hs.494892 // mixed; uterus; cranial nerve; embryonic tissue; ovary;	chr9	+	115940416	116114601	554	NM_032888 // COL27A1 // collagen, type XXVII, alpha 1 // 9q32 // 85301 /// AK021	0.179451	0	0.000516104	0	5.19234	5.19234	0.747535	14.2559	5.63164	5.63164	1.07225	14.3	0.179451	-0.439299	NM_032888 // RefSeq // Homo sapiens collagen, type XXVII, alpha 1 (COL27A1), mRN	NM_032888
48	3665882	NM_014329 // RefSeq // Homo sapiens enhancer of mRNA decapping 4 (EDC4), mRNA. /	NM_014329 // Hs.75682 // brain; uncharacterized tissue; testis; placenta; whole	chr16	+	66464448	66492725	190	NM_014329 // EDC4 // enhancer of mRNA decapping 4 // 16q22.1 // 23644 /// NM_198	0.150544	0	0.0005178	0	6.84225	6.84225	0.747535	10.8334	7.37952	7.37952	2.24628	11.2058	0.150544	-0.537271	NM_014329 // RefSeq // Homo sapiens enhancer of mRNA decapping 4 (EDC4), mRNA. /	NM_014329
14	3422855	NM_006851 // RefSeq // Homo sapiens GLI pathogenesis-related 1 (glioma) (GLIPR1)	NM_006851 // Hs.205558 // uterus; brain; whole brain; lung; mouth; kidney; colon	chr12	+	74160747	74181963	72	NM_006851 // GLIPR1 // GLI pathogenesis-related 1 (glioma) // 12q21.2 // 11010 /	0.36297	0	0.000529259	2.1973e-23	5.23064	5.23064	1.32993	8.82698	5.51923	5.51923	0.871403	8.84913	0.36297	-0.288584	NM_006851 // RefSeq // Homo sapiens GLI pathogenesis-related 1 (glioma) (GLIPR1)	NM_006851
4	3635286	XM_001132539 // RefSeq // PREDICTED: Homo sapiens hypothetical protein LOC730126	XM_001132539 // Hs.631707 // kidney; embryonic tissue; prostate; testis; muscle;	chr15	-	78424250	78482952	88	XM_001132539 // LOC730126 // hypothetical protein LOC730126 // 15q25.1 // 730126	0.167883	3.0195e-07	0.000541717	3.1244e-09	4.4962	4.4962	2.69221	5.85386	5.05355	5.05355	3.34494	6.84754	0.167883	-0.557347	XM_001132539 // RefSeq // PREDICTED: Homo sapiens hypothetical protein LOC730126	XM_001132539
30	2360887	NM_002004 // RefSeq // Homo sapiens farnesyl diphosphate synthase (farnesyl pyro	NM_002004 // Hs.335918 // liver; brain; lung; skin; placenta; pancreas; lymph; e	chr1	+	153557321	153567527	128	NM_002004 // FDPS // farnesyl diphosphate synthase (farnesyl pyrophosphate synth	0.280895	0	0.000552061	0	7.02569	7.02569	1.70307	10.1996	7.40081	7.40081	1.46373	11.0102	0.280895	-0.375123	NM_002004 // RefSeq // Homo sapiens farnesyl diphosphate synthase (farnesyl pyro	NM_002004
31	3723687	NM_016835 // RefSeq // Homo sapiens microtubule-associated protein tau (MAPT), t	NM_016835 // Hs.101174 // brain; whole brain; eye; lung; uncharacterized tissue;	chr17	+	41327624	41461532	256	NM_016835 // MAPT // microtubule-associated protein tau // 17q21.1 // 4137 /// N	0.228546	0	0.000554612	0	8.03948	8.03948	1.50859	11.7045	8.46848	8.46848	1.71523	12.2207	0.228546	-0.429	NM_016835 // RefSeq // Homo sapiens microtubule-associated protein tau (MAPT), t	NM_016835
78	2482505	NM_003128 // RefSeq // Homo sapiens spectrin, beta, non-erythrocytic 1 (SPTBN1),	NM_003128 // Hs.503178 // brain; colon; lung; mixed; uncharacterized tissue; pla	chr2	+	54536921	54752067	458	NM_003128 // SPTBN1 // spectrin, beta, non-erythrocytic 1 // 2p21 // 6711 /// NM	0.440333	0	0.000563276	0	8.29292	8.29292	2.61407	12.3632	8.55363	8.55363	3.12868	12.593	0.440333	-0.260711	NM_003128 // RefSeq // Homo sapiens spectrin, beta, non-erythrocytic 1 (SPTBN1),	NM_003128
11	3665215	NM_001538 // RefSeq // Homo sapiens heat shock transcription factor 4 (HSF4), tr	NM_001538 // Hs.512156 // brain; placenta; pancreas; salivary gland; testis; liv	chr16	+	65751389	65755578	40	NM_001538 // HSF4 // heat shock transcription factor 4 // 16q21 // 3299 /// NM_0	0.188875	0	0.000569239	1.06498e-15	6.0914	6.0914	3.1355	9.90427	6.44108	6.44108	2.53783	11.2469	0.188875	-0.349684	NM_001538 // RefSeq // Homo sapiens heat shock transcription factor 4 (HSF4), tr	NM_001538
11	3456630	NM_012117 // RefSeq // Homo sapiens chromobox homolog 5 (HP1 alpha homolog, Dros	NM_012117 // Hs.632724 // liver; brain; mixed; colon; embryonic tissue; uncharac	chr12	-	52917958	52960189	92	NM_012117 // CBX5 // chromobox homolog 5 (HP1 alpha homolog, Drosophila) // 12q1	0.324625	0	0.000573013	3.45404e-39	8.06609	8.06609	2.73543	10.3558	8.42277	8.42277	3.86687	10.8272	0.324625	-0.356676	NM_012117 // RefSeq // Homo sapiens chromobox homolog 5 (HP1 alpha homolog, Dros	NM_012117
90	2677388	NM_015576 // RefSeq // Homo sapiens ELKS/RAB6-interacting/CAST family member 2 (	NM_015576 // Hs.476389 // brain; whole brain; pancreas; mammary gland; cochlea;	chr3	-	55517379	56498186	683	NM_015576 // ERC2 // ELKS/RAB6-interacting/CAST family member 2 // 3p14.3 // 260	0.383033	0	0.000588834	0	5.3737	5.3737	1.04426	10.4288	5.65369	5.65369	1.06785	10.6102	0.383033	-0.27999	NM_015576 // RefSeq // Homo sapiens ELKS/RAB6-interacting/CAST family member 2 (	NM_015576
3	3220484	NM_205859 // RefSeq // Homo sapiens olfactory receptor, family 2, subfamily K, m	NM_205859 // Hs.381312 // ---	chr9	-	113129584	113130621	15	NM_205859 // OR2K2 // olfactory receptor, family 2, subfamily K, member 2 // 9q3	0.0810244	1.10822e-05	0.000601701	0.00800277	3.54246	3.54246	2.51502	5.21632	4.11068	4.11068	1.70656	5.9307	0.0810244	-0.568222	NM_205859 // RefSeq // Homo sapiens olfactory receptor, family 2, subfamily K, m	NM_205859
27	2577856	NM_005915 // RefSeq // Homo sapiens MCM6 minichromosome maintenance deficient 6	NM_005915 // Hs.444118 // testis; brain; thymus; uncharacterized tissue; whole b	chr2	-	136261890	136311209	156	NM_005915 // MCM6 // minichromosome maintenance deficient 6 homolog (S. cerevisi	0.300496	0	0.000607504	0	4.13267	4.13267	1.60435	6.11714	4.45943	4.45943	2.16331	6.5039	0.300496	-0.32676	NM_005915 // RefSeq // Homo sapiens MCM6 minichromosome maintenance deficient 6	NM_005915
39	3568184	NM_001040276 // RefSeq // Homo sapiens estrogen receptor 2 (ER beta) (ESR2), tra	NM_001040276 // Hs.443150 // testis; uncharacterized tissue; larynx; whole brain	chr14	-	63620707	63875070	268	NM_001040276 // ESR2 // estrogen receptor 2 (ER beta) // 14q23.2 // 2100 /// NM_	0.167942	0	0.000621236	0	4.23768	4.23768	1.44605	10.1405	4.62696	4.62696	1.00548	10.2655	0.167942	-0.389277	NM_001040276 // RefSeq // Homo sapiens estrogen receptor 2 (ER beta) (ESR2), tra	NM_001040276
18	3894228	NM_177559 // RefSeq // Homo sapiens casein kinase 2, alpha 1 polypeptide (CSNK2A	NM_177559 // Hs.501911 // brain; mouth; testis; mixed; blood; pharynx; muscle; m	chr20	-	402069	472534	207	NM_177559 // CSNK2A1 // casein kinase 2, alpha 1 polypeptide // 20p13 // 1457 //	0.0825855	0	0.000626321	4.20227e-36	5.3424	5.3424	1.756	10.1567	5.92598	5.92598	2.20378	10.8338	0.0825855	-0.58358	NM_177559 // RefSeq // Homo sapiens casein kinase 2, alpha 1 polypeptide (CSNK2A	NM_177559
54	3853108	NM_000435 // RefSeq // Homo sapiens Notch homolog 3 (Drosophila) (NOTCH3), mRNA.	NM_000435 // Hs.8546 // mixed; uncharacterized tissue; embryonic tissue; placent	chr19	-	15124493	15172792	256	NM_000435 // NOTCH3 // Notch homolog 3 (Drosophila) // 19p13.2-p13.1 // 4854 ///	0.122749	0	0.000638283	0	6.5753	6.5753	2.66909	8.84832	7.09546	7.09546	3.68266	9.58652	0.122749	-0.520162	NM_000435 // RefSeq // Homo sapiens Notch homolog 3 (Drosophila) (NOTCH3), mRNA.	NM_000435
23	3142554	NM_152836 // RefSeq // Homo sapiens sorting nexin 16 (SNX16), transcript variant	NM_152836 // Hs.492121 // skin; ovary; uncharacterized tissue; kidney; brain; wh	chr8	-	82874373	82933759	95	NM_152836 // SNX16 // sorting nexin 16 // 8q21.13 // 64089 /// NM_152837 // SNX1	0.578426	0	0.000638606	5.60519e-45	5.32529	5.32529	0.794735	8.66922	5.53632	5.53632	0.906502	8.84135	0.578426	-0.211029	NM_152836 // RefSeq // Homo sapiens sorting nexin 16 (SNX16), transcript variant	NM_152836
34	2758978	NM_147127 // RefSeq // Homo sapiens Ellis van Creveld syndrome 2 (limbin) (EVC2)	NM_147127 // Hs.87306 // prostate; cranial nerve; uncharacterized tissue; uterus	chr4	-	5595410	5762176	225	NM_147127 // EVC2 // Ellis van Creveld syndrome 2 (limbin) // 4p16.2-p16.1 // 13	0.261352	0	0.000645044	0	4.57022	4.57022	1.03385	7.91165	4.90999	4.90999	1.49974	8.62771	0.261352	-0.339773	NM_147127 // RefSeq // Homo sapiens Ellis van Creveld syndrome 2 (limbin) (EVC2)	NM_147127
33	3464912	NM_172240 // RefSeq // Homo sapiens WD repeat domain 51B (WDR51B), mRNA. // chr1	NM_172240 // Hs.25130 // brain; thyroid; testis; colon; embryonic tissue; bone m	chr12	-	88337634	88463470	207	NM_172240 // WDR51B // WD repeat domain 51B // 12q21.33 // 282809 /// AK123106 /	0.391039	0	0.000654248	0	5.62242	5.62242	1.63191	9.14264	5.92902	5.92902	1.29219	9.764	0.391039	-0.306598	NM_172240 // RefSeq // Homo sapiens WD repeat domain 51B (WDR51B), mRNA. // chr1	NM_172240
10	3815097	NM_005860 // RefSeq // Homo sapiens follistatin-like 3 (secreted glycoprotein) (	NM_005860 // Hs.529038 // placenta; brain; mixed; uncharacterized tissue; lung;	chr19	+	625029	634385	53	NM_005860 // FSTL3 // follistatin-like 3 (secreted glycoprotein) // 19p13 // 102	0.196349	0	0.000661074	5.62877e-25	6.14477	6.14477	2.81823	8.92406	6.53138	6.53138	3.24082	9.48482	0.196349	-0.386609	NM_005860 // RefSeq // Homo sapiens follistatin-like 3 (secreted glycoprotein) (	NM_005860
6	2978755	XR_015835 // RefSeq // PREDICTED: Homo sapiens similar to U2 small nuclear ribon	XR_015835 // Hs.648039 // mixed; ascites	chr6	-	149436448	149492212	59	XR_015835 // LOC729200 // similar to U2 small nuclear ribonucleoprotein B // 6q2	0.102731	5.03681e-17	0.000674637	2.01739e-05	4.0984	4.0984	1.76661	6.64664	4.60808	4.60808	1.92828	6.78678	0.102731	-0.509676	XR_015835 // RefSeq // PREDICTED: Homo sapiens similar to U2 small nuclear ribon	XR_015835
17	2410470	NM_003629 // RefSeq // Homo sapiens phosphoinositide-3-kinase, regulatory subuni	NM_003629 // Hs.534951 // testis; brain; uncharacterized tissue; mixed; muscle;	chr1	-	46278409	46389475	117	NM_003629 // PIK3R3 // phosphoinositide-3-kinase, regulatory subunit 3 (p55, gam	0.211293	0	0.000687945	6.37051e-32	5.9622	5.9622	0.841935	9.96106	6.42918	6.42918	1.3857	10.349	0.211293	-0.466987	NM_003629 // RefSeq // Homo sapiens phosphoinositide-3-kinase, regulatory subuni	NM_003629
20	3836266	NM_006732 // RefSeq // Homo sapiens FBJ murine osteosarcoma viral oncogene homol	NM_006732 // Hs.590958 // trachea; uterus; uncharacterized tissue; lung; brain;	chr19	+	50624036	50671180	107	NM_006732 // FOSB // FBJ murine osteosarcoma viral oncogene homolog B // 19q13.3	0.0670066	0	0.000688098	0	5.42549	5.42549	2.22077	7.99978	6.12984	6.12984	3.32921	9.1766	0.0670066	-0.704346	NM_006732 // RefSeq // Homo sapiens FBJ murine osteosarcoma viral oncogene homol	NM_006732
2	2920840	XM_168053 // RefSeq // PREDICTED: Homo sapiens chromosome 6 open reading frame 1	XM_168053 // Hs.544485 // uncharacterized tissue; lung; placenta; testis; mixed;	chr6	+	109717619	109717973	8	XM_168053 // C6orf184 // chromosome 6 open reading frame 184 // 6q21 // 221261	0.462268	2.82132e-05	0.000696435	2.6534e-06	4.70332	4.70332	3.13	5.74532	4.9968	4.9968	3.7755	6.24493	0.462268	-0.293472	XM_168053 // RefSeq // PREDICTED: Homo sapiens chromosome 6 open reading frame 1	XM_168053
35	3627363	NM_024611 // RefSeq // Homo sapiens NMDA receptor regulated 2 (NARG2), transcrip	NM_024611 // Hs.200943 // brain; testis; mixed; uterus; lung; lymph node; kidney	chr15	-	58500956	58558626	207	NM_024611 // NARG2 // NMDA receptor regulated 2 // 15q22.2 // 79664 /// NM_00101	0.333325	0	0.00069868	0	5.11612	5.11612	1.38548	8.38597	5.47898	5.47898	1.32539	9.06991	0.333325	-0.362865	NM_024611 // RefSeq // Homo sapiens NMDA receptor regulated 2 (NARG2), transcrip	NM_024611
14	3138811	NM_025054 // RefSeq // Homo sapiens valosin containing protein (p97)/p47 complex	NM_025054 // Hs.632066 // brain; uncharacterized tissue; testis; mammary gland;	chr8	-	67704749	67817697	105	NM_025054 // VCPIP1 // valosin containing protein (p97)/p47 complex interacting	0.127314	0	0.000698998	7.92913e-15	5.14585	5.14585	0.747535	9.4559	5.57227	5.57227	1.87052	9.60305	0.127314	-0.426413	NM_025054 // RefSeq // Homo sapiens valosin containing protein (p97)/p47 complex	NM_025054
20	2404158	NM_006762 // RefSeq // Homo sapiens lysosomal associated multispanning membrane	NM_006762 // Hs.371021 // uncharacterized tissue; lymph node; brain; blood; mixe	chr1	-	30977913	31095913	177	NM_006762 // LAPTM5 // lysosomal associated multispanning membrane protein 5 //	0.100196	0	0.000704951	0	6.00828	6.00828	1.86306	8.74695	6.68907	6.68907	2.03794	9.87433	0.100196	-0.68079	NM_006762 // RefSeq // Homo sapiens lysosomal associated multispanning membrane	NM_006762
12	3801093	NM_172241 // RefSeq // Homo sapiens cutaneous T-cell lymphoma-associated antigen	NM_172241 // Hs.406709 // testis; placenta; mixed; kidney /// NM_203356 // Hs.50	chr18	-	18225577	18253256	49	NM_172241 // CTAGE1 // cutaneous T-cell lymphoma-associated antigen 1 // 18p11.2	0.216219	1.82169e-44	0.000707289	4.49041e-12	3.07872	3.07872	0.843622	5.51173	3.36494	3.36494	0.714908	6.50728	0.216219	-0.28622	NM_172241 // RefSeq // Homo sapiens cutaneous T-cell lymphoma-associated antigen	NM_172241
103	3476457	NM_001077261 // RefSeq // Homo sapiens nuclear receptor co-repressor 2 (NCOR2),	NM_001077261 // Hs.137510 // brain; lung; eye; colon; uncharacterized tissue; pl	chr12	-	123333264	123618185	623	NM_001077261 // NCOR2 // nuclear receptor co-repressor 2 // 12q24 // 9612 /// NM	0.112531	0	0.000709751	0	6.55948	6.55948	1.26606	11.0948	7.06128	7.06128	2.08851	11.4299	0.112531	-0.501793	NM_001077261 // RefSeq // Homo sapiens nuclear receptor co-repressor 2 (NCOR2),	NM_001077261
8	2960832	NM_001025290 // RefSeq // Homo sapiens developmental pluripotency associated 5 (	NM_001025290 // Hs.125331 // uncharacterized tissue	chr6	-	74119508	74120712	35	NM_001025290 // DPPA5 // developmental pluripotency associated 5 // 6q13 // 3401	0.470154	0	0.000713927	3.06971e-20	5.66092	5.66092	1.96008	8.81308	5.85066	5.85066	1.72265	9.23704	0.470154	-0.189741	NM_001025290 // RefSeq // Homo sapiens developmental pluripotency associated 5 (	NM_001025290
20	3558118	NM_138452 // RefSeq // Homo sapiens dehydrogenase/reductase (SDR family) member	NM_138452 // Hs.348350 // mixed; brain; blood; whole brain; uncharacterized tiss	chr14	-	23829647	23838806	104	NM_138452 // DHRS1 // dehydrogenase/reductase (SDR family) member 1 // 14q12 //	0.117866	0	0.000720131	0	5.58516	5.58516	2.41146	9.09725	6.22143	6.22143	2.40833	9.97779	0.117866	-0.636267	NM_138452 // RefSeq // Homo sapiens dehydrogenase/reductase (SDR family) member	NM_138452
3	3218474	NM_001001961 // RefSeq // Homo sapiens olfactory receptor, family 13, subfamily	NM_001001961 // Hs.553600 // ---	chr9	-	106337872	106338915	12	NM_001001961 // OR13C3 // olfactory receptor, family 13, subfamily C, member 3 /	0.8728	8.32903e-11	0.000725943	0.000964403	3.1859	3.1859	1.50764	4.76845	3.13524	3.13524	1.18595	5.60068	0.8728	0.0506647	NM_001001961 // RefSeq // Homo sapiens olfactory receptor, family 13, subfamily	NM_001001961
8	2559619	NM_003960 // RefSeq // Homo sapiens N-acetyltransferase 8 (NAT8), mRNA. // chr2	NM_003960 // Hs.14637 // mixed; kidney; liver; spleen; uncharacterized tissue; m	chr2	-	73701241	73782670	60	NM_003960 // NAT8 // N-acetyltransferase 8 // 2p13.1-p12 // 9027 /// NM_016347 /	0.565168	9.95584e-17	0.000748421	5.2356e-09	4.31601	4.31601	1.26606	6.00791	4.50261	4.50261	1.1087	6.46106	0.565168	-0.186603	NM_003960 // RefSeq // Homo sapiens N-acetyltransferase 8 (NAT8), mRNA. // chr2	NM_003960
35	3725392	NM_005831 // RefSeq // Homo sapiens calcium binding and coiled-coil domain 2 (CA	NM_005831 // Hs.514920 // brain; testis; spleen; bone marrow; bladder; adipose t	chr17	+	44263369	44313764	213	NM_005831 // CALCOCO2 // calcium binding and coiled-coil domain 2 // 17q21.32 //	0.47944	0	0.000748716	0	5.72748	5.72748	1.44774	10.6684	6.02712	6.02712	2.04215	9.96827	0.47944	-0.299641	NM_005831 // RefSeq // Homo sapiens calcium binding and coiled-coil domain 2 (CA	NM_005831
5	3916508	NR_001458 // RefSeq // Homo sapiens BIC transcript (BIC) on chromosome 21. // ch	NR_001458 // Hs.388313 // uncharacterized tissue; blood; pharynx; colon; brain;	chr21	+	25856386	25869344	36	NR_001458 // BIC // BIC transcript // 21q21.3 // 114614	0.850369	4.94556e-28	0.000751977	2.01016e-07	4.15453	4.15453	2.18169	6.75627	4.20647	4.20647	2.33055	7.97147	0.850369	-0.0519364	NR_001458 // RefSeq // Homo sapiens BIC transcript (BIC) on chromosome 21. // ch	NR_001458
16	3833183	NM_013268 // RefSeq // Homo sapiens lectin, galactoside-binding, soluble, 13 (ga	NM_013268 // Hs.23671 // placenta; mixed; embryonic tissue	chr19	+	44766909	44861569	144	NM_013268 // LGALS13 // lectin, galactoside-binding, soluble, 13 (galectin 13) /	0.223008	0	0.000756312	2.6907e-19	3.77247	3.77247	1.37458	9.30798	4.08189	4.08189	1.61263	9.77129	0.223008	-0.309422	NM_013268 // RefSeq // Homo sapiens lectin, galactoside-binding, soluble, 13 (ga	NM_013268
45	3183604	NM_021224 // RefSeq // Homo sapiens zinc finger protein 462 (ZNF462), mRNA. // c	NM_021224 // Hs.370379 // prostate; testis; brain; mammary gland; colon; eye; pl	chr9	+	108665209	108815726	291	NM_021224 // ZNF462 // zinc finger protein 462 // 9q31.2 // 58499 /// AK027866 /	0.312571	0	0.000759179	0	6.01024	6.01024	1.141	9.23634	6.35247	6.35247	1.2824	9.66341	0.312571	-0.342233	NM_021224 // RefSeq // Homo sapiens zinc finger protein 462 (ZNF462), mRNA. // c	NM_021224
8	3127584	NM_004430 // RefSeq // Homo sapiens early growth response 3 (EGR3), mRNA. // chr	NM_004430 // Hs.534313 // brain; lung; liver; pancreas; vascular; uncharacterize	chr8	-	22601119	22606760	32	NM_004430 // EGR3 // early growth response 3 // 8p23-p21 // 1960 /// XM_00113004	0.013704	0	0.000775393	3.69493e-15	6.29701	6.29701	1.68821	9.09611	7.15159	7.15159	3.74623	9.7282	0.013704	-0.854576	NM_004430 // RefSeq // Homo sapiens early growth response 3 (EGR3), mRNA. // chr	NM_004430
20	3662387	NM_001010990 // RefSeq // Homo sapiens homocysteine-inducible, endoplasmic retic	NM_001010990 // Hs.146393 // brain; lung; placenta; prostate; kidney; eye; conne	chr16	+	55523269	55552122	112	NM_001010990 // HERPUD1 // homocysteine-inducible, endoplasmic reticulum stress-	0.12316	0	0.000780916	0	6.5102	6.5102	1.22022	10.5918	7.26069	7.26069	2.72929	11.3362	0.12316	-0.750486	NM_001010990 // RefSeq // Homo sapiens homocysteine-inducible, endoplasmic retic	NM_001010990
25	3719474	NM_001488 // RefSeq // Homo sapiens transcriptional adaptor 2 (ADA2 homolog, yea	NM_001488 // Hs.500066 // brain; uncharacterized tissue; mammary gland; liver; m	chr17	+	32841101	32913942	144	NM_001488 // TADA2L // transcriptional adaptor 2 (ADA2 homolog, yeast)-like // 1	0.512734	0	0.000789761	0	6.02175	6.02175	1.06611	10.411	6.26699	6.26699	1.38533	10.8955	0.512734	-0.245242	NM_001488 // RefSeq // Homo sapiens transcriptional adaptor 2 (ADA2 homolog, yea	NM_001488
12	3048447	NM_021223 // RefSeq // Homo sapiens myosin, light chain 7, regulatory (MYL7), mR	NM_021223 // Hs.75636 // heart; lung; mixed; uncharacterized tissue; liver; embr	chr7	-	44144992	44147499	57	NM_021223 // MYL7 // myosin, light chain 7, regulatory // 7p21-p11.2 // 58498	0.292852	0	0.000819781	7.87981e-27	5.78096	5.78096	2.34077	9.2605	6.07835	6.07835	1.52991	9.71743	0.292852	-0.297383	NM_021223 // RefSeq // Homo sapiens myosin, light chain 7, regulatory (MYL7), mR	NM_021223
25	3633191	BC064575 // GenBank // Homo sapiens chromosome 15 open reading frame 17, mRNA (c	BC064575 // Hs.367690 // brain; lung; mammary gland; embryonic tissue; uncharact	chr15	-	72979398	72986392	113	BC064575 // C15orf17 // chromosome 15 open reading frame 17 // 15q24.1 // 57184	0.238092	0	0.000860757	0	6.3831	6.3831	1.7831	8.84945	6.85641	6.85641	3.39848	9.23487	0.238092	-0.473315	BC064575 // GenBank // Homo sapiens chromosome 15 open reading frame 17, mRNA (c	BC064575
21	2901620	NM_005516 // RefSeq // Homo sapiens major histocompatibility complex, class I, E	NM_005516 // Hs.118354 // brain; lung; uncharacterized tissue; pancreas; placent	chr6	+	30565243	30620086	127	NM_005516 // HLA-E // major histocompatibility complex, class I, E // 6p21.3 //	0.0957046	0	0.000879147	0	6.93634	6.93634	2.02651	10.8795	7.59611	7.59611	2.02733	11.4276	0.0957046	-0.659767	NM_005516 // RefSeq // Homo sapiens major histocompatibility complex, class I, E	NM_005516
81	3536905	NM_182926 // RefSeq // Homo sapiens kinectin 1 (kinesin receptor) (KTN1), mRNA.	NM_182926 // Hs.509414 // connective tissue; brain; kidney; testis; uncharacteri	chr14	+	55095563	55262315	450	NM_182926 // KTN1 // kinectin 1 (kinesin receptor) // 14q22.1 // 3895 /// AK1254	0.589459	0	0.000880802	0	5.53137	5.53137	0.819084	11.0687	5.70644	5.70644	1.17974	11.5153	0.589459	-0.175062	NM_182926 // RefSeq // Homo sapiens kinectin 1 (kinesin receptor) (KTN1), mRNA.	NM_182926
30	2361635	NM_021948 // RefSeq // Homo sapiens brevican (BCAN), transcript variant 1, mRNA.	NM_021948 // Hs.516904 // brain; whole brain; colon; skin; lung; mixed; kidney;	chr1	+	154877826	154895939	154	NM_021948 // BCAN // brevican // 1q31 // 63827 /// NM_198427 // BCAN // brevican	0.16822	0	0.000917173	0	7.24675	7.24675	2.16486	10.388	7.81295	7.81295	2.55814	10.7369	0.16822	-0.566203	NM_021948 // RefSeq // Homo sapiens brevican (BCAN), transcript variant 1, mRNA.	NM_021948
34	3262433	NM_014720 // RefSeq // Homo sapiens STE20-like kinase (yeast) (SLK), mRNA. // ch	NM_014720 // Hs.591922 // lung; liver; placenta; cochlea; prostate; uterus; vasc	chr10	+	105716666	105778975	177	NM_014720 // SLK // STE20-like kinase (yeast) // 10q25.1 // 9748 /// AB002804 //	0.480736	0	0.000926527	0	7.01535	7.01535	1.44576	9.95499	7.23388	7.23388	0.969542	10.1428	0.480736	-0.218527	NM_014720 // RefSeq // Homo sapiens STE20-like kinase (yeast) (SLK), mRNA. // ch	NM_014720
51	3990616	NM_021946 // RefSeq // Homo sapiens BCL6 co-repressor-like 1 (BCORL1), mRNA. //	NM_021946 // Hs.496748 // placenta; eye; kidney; uterus; embryonic tissue; thyro	chrX	+	128934857	129022544	282	NM_021946 // BCORL1 // BCL6 co-repressor-like 1 // Xq25-q26.1 // 63035 /// AK124	0.114185	0	0.000928288	0	5.27156	5.27156	1.1268	10.826	5.77831	5.77831	1.99306	11.3865	0.114185	-0.50675	NM_021946 // RefSeq // Homo sapiens BCL6 co-repressor-like 1 (BCORL1), mRNA. //	NM_021946
3	2315894	NM_022834 // RefSeq // Homo sapiens von Willebrand factor A domain containing 1	NM_022834 // Hs.449009 // pancreas; prostate; brain; mixed; lung; placenta; colo	chr1	+	1360124	1368121	89	NM_022834 // VWA1 // von Willebrand factor A domain containing 1 // 1p36.33 // 6	0.0945659	7.11858e-24	0.000949548	5.04737e-05	6.49012	6.49012	2.67748	9.2266	6.97132	6.97132	2.81293	9.38063	0.0945659	-0.481204	NM_022834 // RefSeq // Homo sapiens von Willebrand factor A domain containing 1	NM_022834
36	3372129	NM_000256 // RefSeq // Homo sapiens myosin binding protein C, cardiac (MYBPC3),	NM_000256 // Hs.524906 // heart; uncharacterized tissue; lung; liver; mixed; mus	chr11	-	47309543	47330809	160	NM_000256 // MYBPC3 // myosin binding protein C, cardiac // 11p11.2 // 4607	0.229166	0	0.000975455	0	5.35861	5.35861	2.43783	8.04982	5.71355	5.71355	1.87656	9.15274	0.229166	-0.354933	NM_000256 // RefSeq // Homo sapiens myosin binding protein C, cardiac (MYBPC3),	NM_000256
24	3556454	NM_005407 // RefSeq // Homo sapiens sal-like 2 (Drosophila) (SALL2), mRNA. // ch	NM_005407 // Hs.416358 // brain; embryonic tissue; whole brain; testis; pineal g	chr14	-	21059074	21075433	90	NM_005407 // SALL2 // sal-like 2 (Drosophila) // 14q11.1-q12 // 6297 /// BC09095	0.165288	0	0.000983898	0	6.33205	6.33205	2.6132	8.97492	6.83183	6.83183	3.29518	9.09688	0.165288	-0.49977	NM_005407 // RefSeq // Homo sapiens sal-like 2 (Drosophila) (SALL2), mRNA. // ch	NM_005407
36	3250726	NM_014431 // RefSeq // Homo sapiens KIAA1274 (KIAA1274), mRNA. // chr10 // 100 /	NM_014431 // Hs.202351 // brain; kidney; colon; lung; embryonic tissue; mixed; t	chr10	+	71908593	71998212	187	NM_014431 // KIAA1274 // KIAA1274 // 10q22.1 // 27143	0.0884929	0	0.00101997	0	5.62905	5.62905	2.72868	7.97136	6.17623	6.17623	2.50977	8.5405	0.0884929	-0.547176	NM_014431 // RefSeq // Homo sapiens KIAA1274 (KIAA1274), mRNA. // chr10 // 100 /	NM_014431
11	2471963	XR_019011 // RefSeq // PREDICTED: Homo sapiens similar to aromatic-preferring am	XR_019011 // Hs.651053 // --- /// NM_207331 // Hs.484969 // mammary gland; colon	chr2	+	20449638	20480301	48	XR_019011 // LOC651042 // similar to aromatic-preferring amino acid transporter	0.29877	0	0.00105313	1.60666e-19	4.54548	4.54548	0.940765	7.69528	4.84334	4.84334	1.2292	7.95986	0.29877	-0.297867	XR_019011 // RefSeq // PREDICTED: Homo sapiens similar to aromatic-preferring am	XR_019011
4	2899243	NM_003540 // RefSeq // Homo sapiens histone cluster 1, H4f (HIST1H4F), mRNA. //	NM_003540 // Hs.247816 // blood; connective tissue /// BC093763 // Hs.247816 //	chr6	+	26348633	26348990	14	NM_003540 // HIST1H4F // histone cluster 1, H4f // 6p21.3 // 8361 /// BC093763 /	0.730898	1.84551e-17	0.00105954	4.66185e-05	6.81392	6.81392	3.79812	8.32057	6.71461	6.71461	4.49419	8.84424	0.730898	0.0993097	NM_003540 // RefSeq // Homo sapiens histone cluster 1, H4f (HIST1H4F), mRNA. //	NM_003540
36	3983228	NM_053281 // RefSeq // Homo sapiens dachshund homolog 2 (Drosophila) (DACH2), mR	NM_053281 // Hs.86603 // brain; uterus; mixed; kidney; whole body; lung; connect	chrX	+	85280321	85974261	276	NM_053281 // DACH2 // dachshund homolog 2 (Drosophila) // Xq21.3 // 117154 /// B	0.142022	0	0.00106294	8.3083e-42	3.71432	3.71432	0.925316	8.40743	4.07919	4.07919	1.08511	8.49215	0.142022	-0.364869	NM_053281 // RefSeq // Homo sapiens dachshund homolog 2 (Drosophila) (DACH2), mR	NM_053281
46	3849044	NM_012335 // RefSeq // Homo sapiens myosin IF (MYO1F), mRNA. // chr19 // 100 //	CR591256 // Hs.631883 // cervix; testis; uterus; placenta /// NR_003190 // Hs.41	chr19	-	8491683	8548337	271	NM_012335 // MYO1F // myosin IF // 19p13.3-p13.2 // 4542 /// CR607653 // MYO1F /	0.14647	0	0.00110571	0	5.12765	5.12765	1.45789	9.31866	5.5731	5.5731	2.04013	10.1974	0.14647	-0.445453	NM_012335 // RefSeq // Homo sapiens myosin IF (MYO1F), mRNA. // chr19 // 100 //	NM_012335
51	2960146	NM_001851 // RefSeq // Homo sapiens collagen, type IX, alpha 1 (COL9A1), transcr	NM_001851 // Hs.590892 // cochlea; whole body; eye; ovary; brain; skin; mammary	chr6	-	70963147	71095413	284	NM_001851 // COL9A1 // collagen, type IX, alpha 1 // 6q12-q14 // 1297 /// NM_078	0.177016	0	0.00111804	0	4.38099	4.38099	1.05262	9.2392	4.74542	4.74542	0.714908	9.89468	0.177016	-0.364429	NM_001851 // RefSeq // Homo sapiens collagen, type IX, alpha 1 (COL9A1), transcr	NM_001851
11	3529064	NM_004643 // RefSeq // Homo sapiens poly(A) binding protein, nuclear 1 (PABPN1),	NM_004643 // Hs.117176 // brain; embryonic tissue; other; lymph; thymus; lung; e	chr14	+	22845856	22850994	52	NM_004643 // PABPN1 // poly(A) binding protein, nuclear 1 // 14q11.2-q13 // 8106	0.239127	0	0.00115102	1.11329e-32	7.34624	7.34624	2.85964	11.2612	7.79467	7.79467	3.19855	11.4583	0.239127	-0.448424	NM_004643 // RefSeq // Homo sapiens poly(A) binding protein, nuclear 1 (PABPN1),	NM_004643
13	3863761	NM_006905 // RefSeq // Homo sapiens pregnancy specific beta-1-glycoprotein 1 (PS	NM_006905 // Hs.466843 // placenta; mixed; uncharacterized tissue; brain; bladde	chr19	-	47916784	48075715	163	NM_006905 // PSG1 // pregnancy specific beta-1-glycoprotein 1 // 19q13.2 // 5669	0.186835	0	0.00115451	8.04972e-15	3.4398	3.4398	0.990746	5.68944	3.76104	3.76104	1.32414	6.33952	0.186835	-0.321245	NM_006905 // RefSeq // Homo sapiens pregnancy specific beta-1-glycoprotein 1 (PS	NM_006905
28	3387537	NM_032427 // RefSeq // Homo sapiens mastermind-like 2 (Drosophila) (MAML2), mRNA	NM_032427 // Hs.428214 // brain; placenta; colon; mammary gland; lung; uterus; u	chr11	-	95349408	95716105	309	NM_032427 // MAML2 // mastermind-like 2 (Drosophila) // 11q21 // 84441 /// CR627	0.235613	0	0.00117005	0	5.1177	5.1177	1.22459	8.84211	5.60757	5.60757	1.65303	8.98793	0.235613	-0.489868	NM_032427 // RefSeq // Homo sapiens mastermind-like 2 (Drosophila) (MAML2), mRNA	NM_032427
74	3438061	NM_198827 // RefSeq // Homo sapiens G protein-coupled receptor 133 (GPR133), mRN	NM_198827 // Hs.435168 // testis; placenta; brain; lung; mixed; uncharacterized	chr12	+	129999464	130214409	521	NM_198827 // GPR133 // G protein-coupled receptor 133 // 12q24.33 // 283383 ///	0.139451	0	0.001172	0	5.07045	5.07045	1.14088	9.00397	5.53709	5.53709	0.857504	9.6803	0.139451	-0.466637	NM_198827 // RefSeq // Homo sapiens G protein-coupled receptor 133 (GPR133), mRN	NM_198827
8	3320046	XM_944648 // RefSeq // PREDICTED: Homo sapiens hypothetical protein LOC283104 (L	XM_944648 // Hs.632156 // kidney; ovary; brain; uncharacterized tissue; mixed; c	chr11	+	9736393	9787339	74	XM_944648 // LOC283104 // hypothetical protein LOC283104 // 11p15.4 // 283104 //	0.261915	1.54229e-25	0.00120303	5.65128e-17	5.47699	5.47699	3.5334	7.13628	5.84588	5.84588	2.88333	7.7705	0.261915	-0.368895	XM_944648 // RefSeq // PREDICTED: Homo sapiens hypothetical protein LOC283104 (L	XM_944648
8	4022956	GENSCAN00000014659 // ENSEMBL Prediction // cdna:Genscan chromosome:NCBI36:X:13	XM_927710 // Hs.371717 // brain; mixed; uncharacterized tissue; testis; blood; w	chrX	-	134056701	134060376	49	XM_927710 // LOC644596 // hypothetical LOC644596 // Xq26.3 // 644596	0.207954	0	0.00123869	7.57212e-28	7.56668	7.56668	5.16054	10.6859	8.02151	8.02151	4.30111	11.1128	0.207954	-0.454831	GENSCAN00000014659 // ENSEMBL Prediction // cdna:Genscan chromosome:NCBI36:X:13	GENSCAN00000014659
29	2476075	NM_199436 // RefSeq // Homo sapiens spastin (SPAST), transcript variant 2, mRNA.	NM_199436 // Hs.468091 // brain; thyroid; lung; mammary gland; embryonic tissue;	chr2	+	32142184	32236209	150	NM_199436 // SPAST // spastin // 2p24-p21 // 6683 /// NM_014946 // SPAST // spas	0.394504	0	0.00124875	0	6.68384	6.68384	1.33061	9.16865	6.99737	6.99737	1.73133	9.81063	0.394504	-0.313525	NM_199436 // RefSeq // Homo sapiens spastin (SPAST), transcript variant 2, mRNA.	NM_199436
41	3308489	BC032303 // GenBank // Homo sapiens KIAA1598, mRNA (cDNA clone MGC:40476 IMAGE:5	BC032303 // Hs.501140 // brain; whole brain; testis; nerve; adipose tissue; musc	chr10	-	118633167	118755361	258	BC032303 // KIAA1598 // KIAA1598 // 10q25.3 // 57698 /// AK091578 // KIAA1598 //	0.511757	0	0.0012774	0	7.05726	7.05726	1.44025	10.7083	7.30447	7.30447	2.05806	11.5964	0.511757	-0.247212	BC032303 // GenBank // Homo sapiens KIAA1598, mRNA (cDNA clone MGC:40476 IMAGE:5	BC032303
12	3797543	AK095347 // GenBank // Homo sapiens cDNA FLJ38028 fis, clone CTONG2013222. // ch	AK095347 // Hs.253920 // testis; mixed; uncharacterized tissue; colon; prostate;	chr18	-	6909505	6919945	68	AK095347 // FLJ38028 // hypothetical gene supported by AK095347 // 18p11.31 // 4	0.201797	0	0.00128041	1.66979e-18	3.83326	3.83326	1.169	7.0881	4.18636	4.18636	1.58761	7.92978	0.201797	-0.3531	AK095347 // GenBank // Homo sapiens cDNA FLJ38028 fis, clone CTONG2013222. // ch	AK095347
3	2638360	CR595960 // GenBank // full-length cDNA clone CS0DB006YA22 of Neuroblastoma Cot	XR_016811 // Hs.647945 // prostate	chr3	+	121509152	121509670	24	CR595960 // PTOV1 // prostate tumor overexpressed gene 1 // 19q13.33 // 53635 //	0.0540992	1.64635e-17	0.00128459	2.70151e-08	6.30033	6.30033	3.97776	8.30347	6.98834	6.98834	5.07344	9.29738	0.0540992	-0.688008	CR595960 // GenBank // full-length cDNA clone CS0DB006YA22 of Neuroblastoma Cot	CR595960
35	3643892	NM_016111 // RefSeq // Homo sapiens TEL2, telomere maintenance 2, homolog (S. ce	NM_016111 // Hs.271044 // brain; uncharacterized tissue; embryonic tissue; eye;	chr16	+	1483375	1500874	146	NM_016111 // TELO2 // TEL2, telomere maintenance 2, homolog (S. cerevisiae) // 1	0.0744554	0	0.00130425	0	6.28684	6.28684	2.17196	8.91894	6.86456	6.86456	2.67731	9.5592	0.0744554	-0.577723	NM_016111 // RefSeq // Homo sapiens TEL2, telomere maintenance 2, homolog (S. ce	NM_016111
25	3263743	NM_004419 // RefSeq // Homo sapiens dual specificity phosphatase 5 (DUSP5), mRNA	NM_004419 // Hs.2128 // placenta; prostate; pancreas; ovary; kidney; rectum; hea	chr10	+	112206302	112261283	122	NM_004419 // DUSP5 // dual specificity phosphatase 5 // 10q25 // 1847	0.119947	0	0.00131146	7.70714e-44	4.89364	4.89364	1.69259	9.22298	5.37262	5.37262	1.36883	9.55772	0.119947	-0.478989	NM_004419 // RefSeq // Homo sapiens dual specificity phosphatase 5 (DUSP5), mRNA	NM_004419
20	2612625	NM_138381 // RefSeq // Homo sapiens oxidoreductase NAD-binding domain containing	NM_138381 // Hs.475602 // brain; testis; thyroid; eye; skin; embryonic tissue; p	chr3	+	16281732	16340969	125	NM_138381 // OXNAD1 // oxidoreductase NAD-binding domain containing 1 // 3p25-p2	0.264477	0	0.0013122	1.17485e-41	5.85127	5.85127	1.04426	8.95091	6.24085	6.24085	1.20104	9.54171	0.264477	-0.389583	NM_138381 // RefSeq // Homo sapiens oxidoreductase NAD-binding domain containing	NM_138381
4	2714563	XR_017847 // RefSeq // PREDICTED: Homo sapiens FLJ35816 protein (FLJ35816), misc	XR_017847 // Hs.531391 // testis /// XR_017951 // Hs.531391 // testis	chr4	+	1135170	1137479	16	XR_017847 // FLJ35816 // FLJ35816 protein // 4p16.3 // 401114 /// XR_017951 // F	0.192693	1.18359e-05	0.00131264	8.65221e-09	5.01708	5.01708	3.05739	6.3744	5.44732	5.44732	4.10333	6.73322	0.192693	-0.43024	XR_017847 // RefSeq // PREDICTED: Homo sapiens FLJ35816 protein (FLJ35816), misc	XR_017847
27	3469865	NM_004075 // RefSeq // Homo sapiens cryptochrome 1 (photolyase-like) (CRY1), mRN	NM_004075 // Hs.151573 // testis; lung; uterus; connective tissue; embryonic tis	chr12	-	105900237	106011739	161	NM_004075 // CRY1 // cryptochrome 1 (photolyase-like) // 12q23-q24.1 // 1407 ///	0.478218	0	0.00132167	0	4.86262	4.86262	1.42179	8.5931	5.0973	5.0973	1.3012	8.44061	0.478218	-0.234682	NM_004075 // RefSeq // Homo sapiens cryptochrome 1 (photolyase-like) (CRY1), mRN	NM_004075
21	3978169	NM_022117 // RefSeq // Homo sapiens TSPY-like 2 (TSPYL2), mRNA. // chrX // 100 /	NM_022117 // Hs.136164 // brain; testis; blood; lung; prostate; epididymis; eye;	chrX	+	53124038	53134445	107	NM_022117 // TSPYL2 // TSPY-like 2 // Xp11.2 // 64061 /// AK131220 // TSPYL2 //	0.186748	0	0.00134322	0	7.85416	7.85416	2.13535	12.0253	8.36608	8.36608	2.69542	12.5311	0.186748	-0.511919	NM_022117 // RefSeq // Homo sapiens TSPY-like 2 (TSPYL2), mRNA. // chrX // 100 /	NM_022117
73	3190558	NM_003127 // RefSeq // Homo sapiens spectrin, alpha, non-erythrocytic 1 (alpha-f	NM_003127 // Hs.372331 // brain; whole brain; lung; mammary gland; eye; colon; p	chr9	+	130354704	130435758	347	NM_003127 // SPTAN1 // spectrin, alpha, non-erythrocytic 1 (alpha-fodrin) // 9q3	0.384787	0	0.00135388	0	9.27647	9.27647	2.01439	12.5795	9.56138	9.56138	2.54564	13.0534	0.384787	-0.28491	NM_003127 // RefSeq // Homo sapiens spectrin, alpha, non-erythrocytic 1 (alpha-f	NM_003127
27	3226097	NM_000118 // RefSeq // Homo sapiens endoglin (Osler-Rendu-Weber syndrome 1) (ENG	NM_000118 // Hs.76753 // testis; placenta; lung; brain; vascular; spleen; connec	chr9	-	129615329	129660473	152	NM_000118 // ENG // endoglin (Osler-Rendu-Weber syndrome 1) // 9q33-q34.1 // 202	0.0961943	0	0.0013738	0	6.18223	6.18223	2.67787	8.90216	6.80123	6.80123	2.73956	9.29145	0.0961943	-0.619	NM_000118 // RefSeq // Homo sapiens endoglin (Osler-Rendu-Weber syndrome 1) (ENG	NM_000118
21	3815809	NM_024407 // RefSeq // Homo sapiens NADH dehydrogenase (ubiquinone) Fe-S protein	NM_024407 // Hs.211914 // brain; lung; mammary gland; cranial nerve; adrenal gla	chr19	+	1334707	1346565	88	NM_024407 // NDUFS7 // NADH dehydrogenase (ubiquinone) Fe-S protein 7, 20kDa (NA	0.0939104	0	0.00138417	0	6.69308	6.69308	1.3107	10.389	7.28683	7.28683	2.47595	11.0351	0.0939104	-0.593749	NM_024407 // RefSeq // Homo sapiens NADH dehydrogenase (ubiquinone) Fe-S protein	NM_024407
6	3955216	GENSCAN00000068377 // ENSEMBL Prediction // cdna:Genscan chromosome:NCBI36:22:2	XR_017173 // Hs.648253 // connective tissue; kidney /// XR_015466 // Hs.648262 /	chr22	-	22983392	23003146	51	XR_017173 // LOC644079 // similar to Breakpoint cluster region protein (NY-REN-2	0.470906	1.4013e-45	0.00138461	1.77695e-06	5.04461	5.04461	2.18237	9.29447	5.22065	5.22065	1.78798	9.48943	0.470906	-0.176044	GENSCAN00000068377 // ENSEMBL Prediction // cdna:Genscan chromosome:NCBI36:22:2	GENSCAN00000068377
62	2450568	NM_000069 // RefSeq // Homo sapiens calcium channel, voltage-dependent, L type,	NM_000069 // Hs.1294 // muscle; mixed; thyroid; prostate; brain; uncharacterized	chr1	-	199275265	199350175	316	NM_000069 // CACNA1S // calcium channel, voltage-dependent, L type, alpha 1S sub	0.223798	0	0.00139777	0	4.74437	4.74437	1.12936	8.32237	5.12085	5.12085	0.808505	8.36991	0.223798	-0.376478	NM_000069 // RefSeq // Homo sapiens calcium channel, voltage-dependent, L type,	NM_000069
6	3179121	AK095132 // GenBank // Homo sapiens cDNA FLJ37813 fis, clone BRSSN2002857. // ch	AK095132 // Hs.535950 // kidney; ovary; heart; brain; mixed; blood; uncharacteri	chr9	+	92961882	92972179	21	AK095132 // C9orf73 // chromosome 9 open reading frame 73 // 9q22.31 // 286371	0.660346	1.88272e-17	0.00140761	0.000132084	3.74747	3.74747	2.26552	5.47009	3.84616	3.84616	1.29219	6.73823	0.660346	-0.098688	AK095132 // GenBank // Homo sapiens cDNA FLJ37813 fis, clone BRSSN2002857. // ch	AK095132
16	2451900	NM_000537 // RefSeq // Homo sapiens renin (REN), mRNA. // chr1 // 100 // 94 // 6	NM_000537 // Hs.3210 // colon; mixed; kidney; placenta; skin; uncharacterized ti	chr1	-	202390576	202408315	68	NM_000537 // REN // renin // 1q32 // 5972 /// AF117822 // REN // renin // 1q32 /	0.306229	0	0.00142817	3.30547e-27	4.6129	4.6129	2.1227	6.80008	4.88165	4.88165	2.27369	7.36387	0.306229	-0.268752	NM_000537 // RefSeq // Homo sapiens renin (REN), mRNA. // chr1 // 100 // 94 // 6	NM_000537
55	2391360	NM_017871 // RefSeq // Homo sapiens cleavage and polyadenylation specific factor	NM_017871 // Hs.6449 // brain; testis; uncharacterized tissue; whole brain; uter	chr1	-	1236650	1249913	238	NM_017871 // CPSF3L // cleavage and polyadenylation specific factor 3-like // 1p	0.146145	0	0.00143787	0	6.50772	6.50772	1.38469	10.4308	6.98834	6.98834	2.88989	10.8685	0.146145	-0.48062	NM_017871 // RefSeq // Homo sapiens cleavage and polyadenylation specific factor	NM_017871
29	3169094	NM_024345 // RefSeq // Homo sapiens WD repeat domain 32 (WDR32), mRNA. // chr9 /	NM_024345 // Hs.118394 // brain; testis; whole brain; mixed; muscle; embryonic t	chr9	+	37790563	37868737	213	NM_024345 // WDR32 // WD repeat domain 32 // 9p13.2 // 79269	0.336053	0	0.00144138	0	5.92979	5.92979	1.70475	9.07383	6.25115	6.25115	2.08132	9.50626	0.336053	-0.32136	NM_024345 // RefSeq // Homo sapiens WD repeat domain 32 (WDR32), mRNA. // chr9 /	NM_024345
39	2536217	NM_001001891 // RefSeq // Homo sapiens transmembrane protein 16G (TMEM16G), tran	NM_001001891 // Hs.163909 // prostate; colon; testis; mixed; uterus; embryonic t	chr2	+	241777504	241813455	176	NM_001001891 // TMEM16G // transmembrane protein 16G // 2q37.3 // 50636 /// NM_0	0.184742	0	0.00144333	0	5.63351	5.63351	1.49252	10.6337	6.05075	6.05075	2.26284	10.8532	0.184742	-0.417239	NM_001001891 // RefSeq // Homo sapiens transmembrane protein 16G (TMEM16G), tran	NM_001001891
14	3715997	NM_005208 // RefSeq // Homo sapiens crystallin, beta A1 (CRYBA1), mRNA. // chr17	NM_005208 // Hs.46275 // eye; whole body; uncharacterized tissue; embryonic tiss	chr17	+	24589866	24605630	73	NM_005208 // CRYBA1 // crystallin, beta A1 // 17q11.2 // 1411	0.464782	0	0.00146515	6.21641e-15	3.46872	3.46872	1.26606	8.82461	3.63868	3.63868	1.11664	9.31878	0.464782	-0.169953	NM_005208 // RefSeq // Homo sapiens crystallin, beta A1 (CRYBA1), mRNA. // chr17	NM_005208
9	2516793	NM_021193 // RefSeq // Homo sapiens homeobox D12 (HOXD12), mRNA. // chr2 // 100	NM_021193 // Hs.450028 // kidney; mammary gland	chr2	+	176670165	176675447	48	NM_021193 // HOXD12 // homeobox D12 // 2q31-q32|2q31.1 // 3238	0.41092	7.75441e-26	0.00150215	7.48745e-15	4.17099	4.17099	2.54692	6.32359	4.40635	4.40635	1.76173	6.58894	0.41092	-0.235354	NM_021193 // RefSeq // Homo sapiens homeobox D12 (HOXD12), mRNA. // chr2 // 100	NM_021193
35	2955282	NM_181356 // RefSeq // Homo sapiens suppressor of Ty 3 homolog (S. cerevisiae) (	NM_181356 // Hs.368325 // thyroid; brain; mixed; embryonic tissue; mouth; liver;	chr6	-	44884792	45453675	394	NM_181356 // SUPT3H // suppressor of Ty 3 homolog (S. cerevisiae) // 6p21.1-p21.	0.212734	0	0.00150854	0	5.27671	5.27671	1.41954	9.08778	5.61416	5.61416	1.50246	9.27959	0.212734	-0.337449	NM_181356 // RefSeq // Homo sapiens suppressor of Ty 3 homolog (S. cerevisiae) (	NM_181356
39	2766359	NM_002913 // RefSeq // Homo sapiens replication factor C (activator 1) 1, 145kDa	NM_002913 // Hs.507475 // brain; testis; uncharacterized tissue; lymph node; liv	chr4	-	38965142	39044390	191	NM_002913 // RFC1 // replication factor C (activator 1) 1, 145kDa // 4p14-p13 //	0.466061	0	0.00153983	0	6.1112	6.1112	1.31761	9.77464	6.3611	6.3611	1.43819	10.1637	0.466061	-0.2499	NM_002913 // RefSeq // Homo sapiens replication factor C (activator 1) 1, 145kDa	NM_002913
15	4026925	NM_002910 // RefSeq // Homo sapiens renin binding protein (RENBP), mRNA. // chrX	NM_002910 // Hs.158331 // brain; pancreas; mixed; placenta; skin; lymph node; sm	chrX	-	152853933	152863426	90	NM_002910 // RENBP // renin binding protein // Xq28 // 5973 /// CR612881 // CHEK	0.183626	4.66788e-35	0.00155436	2.06925e-29	5.62856	5.62856	3.09696	7.50732	6.09259	6.09259	2.61325	8.675	0.183626	-0.464028	NM_002910 // RefSeq // Homo sapiens renin binding protein (RENBP), mRNA. // chrX	NM_002910
13	2346023	NM_018103 // RefSeq // Homo sapiens leucine rich repeat containing 8 family, mem	NM_018103 // Hs.482087 // brain; eye; bone marrow; blood; heart; ovary; testis;	chr1	+	90059023	90174585	109	NM_018103 // LRRC8D // leucine rich repeat containing 8 family, member D // 1p22	0.166958	0	0.0015616	1.23523e-33	6.11663	6.11663	1.31675	9.62391	6.59089	6.59089	2.59375	10.4956	0.166958	-0.474261	NM_018103 // RefSeq // Homo sapiens leucine rich repeat containing 8 family, mem	NM_018103
42	2788366	ENST00000379448 // ENSEMBL Transcript // Homo sapiens hypothetical protein LOC15	NM_178835 // Hs.133916 // brain; amniotic fluid; thyroid; uterus; small intestin	chr4	-	146898230	147079542	273	NM_178835 // LOC152485 // hypothetical protein LOC152485 // 4q31.22 // 152485 //	0.383524	0	0.00156518	0	6.28045	6.28045	1.15516	9.99183	6.54807	6.54807	1.126	10.3332	0.383524	-0.267623	ENST00000379448 // ENSEMBL Transcript // Homo sapiens hypothetical protein LOC15	ENST00000379448
49	3463571	NM_002480 // RefSeq // Homo sapiens protein phosphatase 1, regulatory (inhibitor	NM_002480 // Hs.49582 // brain; lung; uterus; mouth; placenta; bladder; connecti	chr12	-	78690959	78853356	325	NM_002480 // PPP1R12A // protein phosphatase 1, regulatory (inhibitor) subunit 1	0.54057	0	0.00161135	0	5.92643	5.92643	1.27764	10.3541	6.1424	6.1424	1.11664	10.4457	0.54057	-0.215965	NM_002480 // RefSeq // Homo sapiens protein phosphatase 1, regulatory (inhibitor	NM_002480
33	3907786	NM_173179 // RefSeq // Homo sapiens solute carrier family 35, member C2 (SLC35C2	NM_173179 // Hs.517080 // brain; uncharacterized tissue; placenta; testis; mixed	chr20	-	44411574	44426471	160	NM_173179 // SLC35C2 // solute carrier family 35, member C2 // 20q13.12 // 51006	0.146852	0	0.00166441	0	6.11233	6.11233	2.79224	9.21489	6.70873	6.70873	3.1539	9.85574	0.146852	-0.596401	NM_173179 // RefSeq // Homo sapiens solute carrier family 35, member C2 (SLC35C2	NM_173179
51	2522094	AF193059 // GenBank // Homo sapiens SP1224 mRNA, complete cds. // chr2 // 99 //	AF193059 // Hs.120323 // brain; mixed; lung; colon; kidney; uncharacterized tiss	chr2	+	200879035	201053805	378	AF193059 // DNAPTP6 // DNA polymerase-transactivated protein 6 // 2q33.1 // 2601	0.312382	0	0.0016749	0	5.3067	5.3067	0.841935	10.3359	5.64372	5.64372	1.32379	11.0815	0.312382	-0.337025	AF193059 // GenBank // Homo sapiens SP1224 mRNA, complete cds. // chr2 // 99 //	AF193059
28	3851374	NM_152601 // RefSeq // Homo sapiens zinc finger protein 709 (ZNF709), mRNA. // c	NM_144976 // Hs.634969 // lung; brain; mixed; testis; uncharacterized tissue; co	chr19	-	12305684	12542940	243	NM_152601 // ZNF709 // zinc finger protein 709 // 19p13.2 // 163051 /// NM_14497	0.342796	0	0.00168074	0	5.17171	5.17171	1.42184	9.34306	5.46166	5.46166	1.37932	9.71336	0.342796	-0.289947	NM_152601 // RefSeq // Homo sapiens zinc finger protein 709 (ZNF709), mRNA. // c	NM_152601
27	3219215	NM_004235 // RefSeq // Homo sapiens Kruppel-like factor 4 (gut) (KLF4), mRNA. //	NM_004235 // Hs.376206 // thyroid; prostate; brain; liver; other; eye; lung; tes	chr9	-	109245450	109344165	142	NM_004235 // KLF4 // Kruppel-like factor 4 (gut) // 9q31 // 9314 /// U70663 // K	0.0410867	0	0.00172759	0	4.97053	4.97053	0.914032	10.191	5.67266	5.67266	1.30177	10.7192	0.0410867	-0.702131	NM_004235 // RefSeq // Homo sapiens Kruppel-like factor 4 (gut) (KLF4), mRNA. //	NM_004235
8	3837232	NR_002797 // RefSeq // Homo sapiens hypothetical protein LOC255783 (LOC255783) o	NR_002797 // Hs.128690 // mixed; uncharacterized tissue; pancreas; testis; muscl	chr19	+	52469519	52470781	32	NR_002797 // LOC255783 // hypothetical protein LOC255783 // 19q13.32 // 255783	0.0764022	0	0.00172786	5.14487e-21	7.58906	7.58906	4.97097	10.4444	8.15452	8.15452	5.75689	11.0949	0.0764022	-0.565456	NR_002797 // RefSeq // Homo sapiens hypothetical protein LOC255783 (LOC255783) o	NR_002797
7	2435546	NM_001009931 // RefSeq // Homo sapiens hornerin (HRNR), mRNA. // chr1 // 100 //	NM_001009931 // Hs.490162 // testis; uncharacterized tissue; ovary	chr1	-	150458994	150467068	32	NM_001009931 // HRNR // hornerin // 1q21.3 // 388697 /// XM_001127437 // LOC7308	0.135607	1.74146e-09	0.00172877	1.39483e-11	3.06265	3.06265	1.46565	4.43976	3.49111	3.49111	1.89802	4.85583	0.135607	-0.428454	NM_001009931 // RefSeq // Homo sapiens hornerin (HRNR), mRNA. // chr1 // 100 //	NM_001009931
42	3158516	NM_013291 // RefSeq // Homo sapiens cleavage and polyadenylation specific factor	NM_013291 // Hs.493202 // embryonic tissue; lung; mixed; uncharacterized tissue;	chr8	-	145589255	145605603	229	NM_013291 // CPSF1 // cleavage and polyadenylation specific factor 1, 160kDa //	0.0707165	0	0.00173051	0	6.54291	6.54291	1.61714	9.78384	7.13707	7.13707	1.66382	10.0885	0.0707165	-0.594165	NM_013291 // RefSeq // Homo sapiens cleavage and polyadenylation specific factor	NM_013291
28	2414366	NM_003713 // RefSeq // Homo sapiens phosphatidic acid phosphatase type 2B (PPAP2	NM_003713 // Hs.405156 // placenta; brain; prostate; mixed; uterus; pancreas; lu	chr1	-	56721589	56883513	246	NM_003713 // PPAP2B // phosphatidic acid phosphatase type 2B // 1pter-p22.1 // 8	0.251939	0	0.00173453	0	6.39701	6.39701	1.92282	12.7098	6.82396	6.82396	2.37412	12.9439	0.251939	-0.426949	NM_003713 // RefSeq // Homo sapiens phosphatidic acid phosphatase type 2B (PPAP2	NM_003713
22	3855633	NM_001001524 // RefSeq // Homo sapiens transmembrane 6 superfamily member 2 (TM6	NM_001001524 // Hs.531624 // embryonic tissue; ovary; small intestine; uncharact	chr19	-	19236180	19245168	97	NM_001001524 // TM6SF2 // transmembrane 6 superfamily member 2 // 19p13.3-p12 //	0.203429	0	0.00176206	3.46779e-41	5.487	5.487	2.66184	8.30677	5.85935	5.85935	2.76979	8.64085	0.203429	-0.372354	NM_001001524 // RefSeq // Homo sapiens transmembrane 6 superfamily member 2 (TM6	NM_001001524
76	3918779	NM_001001132 // RefSeq // Homo sapiens intersectin 1 (SH3 domain protein) (ITSN1	NM_001001132 // Hs.160324 // uncharacterized tissue; brain; mixed; embryonic tis	chr21	+	33936586	34194243	539	NM_001001132 // ITSN1 // intersectin 1 (SH3 domain protein) // 21q22.1-q22.2 //	0.382677	0	0.00177163	0	6.48391	6.48391	1.12986	10.6178	6.77639	6.77639	0.957821	10.8248	0.382677	-0.292474	NM_001001132 // RefSeq // Homo sapiens intersectin 1 (SH3 domain protein) (ITSN1	NM_001001132
9	2913549	NM_001017361 // RefSeq // Homo sapiens ES cell associated trasnsript 1 (ECAT1),	NM_001017361 // Hs.128326 // uncharacterized tissue; mixed; testis; muscle	chr6	+	74128839	74131256	53	NM_001017361 // ECAT1 // ES cell associated trasnsript 1 // 6q13 // 154288	0.460873	0	0.0017749	1.13778e-17	6.10335	6.10335	3.33673	8.45304	6.30288	6.30288	3.66383	9.22825	0.460873	-0.199537	NM_001017361 // RefSeq // Homo sapiens ES cell associated trasnsript 1 (ECAT1),	NM_001017361
48	3709153	NM_203411 // RefSeq // Homo sapiens transmembrane protein 88 (TMEM88), mRNA. //	NM_203411 // Hs.389669 // placenta; mixed; embryonic tissue; uncharacterized tis	chr17	+	7683977	7700877	228	NM_203411 // TMEM88 // transmembrane protein 88 // 17p13.1 // 92162 /// XM_04327	0.135757	0	0.00178347	0	5.87466	5.87466	1.6778	9.41349	6.38134	6.38134	1.86601	10.0529	0.135757	-0.506678	NM_203411 // RefSeq // Homo sapiens transmembrane protein 88 (TMEM88), mRNA. //	NM_203411
26	3764245	NM_000250 // RefSeq // Homo sapiens myeloperoxidase (MPO), nuclear gene encoding	NM_000250 // Hs.458272 // blood; brain; bone marrow; mixed; placenta; thyroid; u	chr17	-	53702221	53713429	125	NM_000250 // MPO // myeloperoxidase // 17q23.1 // 4353	0.111331	0	0.00183691	0	4.99094	4.99094	1.45001	8.08872	5.46649	5.46649	1.7109	8.58549	0.111331	-0.475543	NM_000250 // RefSeq // Homo sapiens myeloperoxidase (MPO), nuclear gene encoding	NM_000250
6	2558271	XM_930257 // RefSeq // PREDICTED: Homo sapiens hypothetical protein LOC647217 (L	XM_930257 // Hs.651153 // bone marrow; esophagus; brain; uterus; thymus; kidney;	chr2	-	69795355	69848058	61	XM_930257 // LOC647217 // hypothetical protein LOC647217 // 2p14 // 647217 /// X	0.316561	0	0.00183877	1.25854e-09	5.45906	5.45906	1.77728	9.07393	5.70819	5.70819	1.8872	9.3685	0.316561	-0.249121	XM_930257 // RefSeq // PREDICTED: Homo sapiens hypothetical protein LOC647217 (L	XM_930257
11	3747324	NM_006275 // RefSeq // Homo sapiens splicing factor, arginine/serine-rich 6 (SFR	NM_006275 // Hs.6891 // brain; blood; uncharacterized tissue; embryonic tissue;	chr17	-	16413334	16510857	162	NM_006275 // SFRS6 // splicing factor, arginine/serine-rich 6 // 20q12-q13.1 //	0.227171	0	0.00185936	9.92456e-23	5.00297	5.00297	1.16156	8.33806	5.42277	5.42277	2.16982	9.13033	0.227171	-0.419799	NM_006275 // RefSeq // Homo sapiens splicing factor, arginine/serine-rich 6 (SFR	NM_006275
61	3627422	NM_134261 // RefSeq // Homo sapiens RAR-related orphan receptor A (RORA), transc	NM_134261 // Hs.569497 // brain; mixed; eye; uncharacterized tissue; liver; lary	chr15	-	58572626	59311205	841	NM_134261 // RORA // RAR-related orphan receptor A // 15q21-q22 // 6095 /// NM_1	0.374153	0	0.00186103	0	5.58363	5.58363	1.15263	10.0925	5.88826	5.88826	1.34017	10.2621	0.374153	-0.304623	NM_134261 // RefSeq // Homo sapiens RAR-related orphan receptor A (RORA), transc	NM_134261
86	3525313	NM_001845 // RefSeq // Homo sapiens collagen, type IV, alpha 1 (COL4A1), mRNA. /	NM_001845 // Hs.17441 // embryonic tissue; placenta; uterus; mixed; lung; unchar	chr13	-	109599321	109762519	474	NM_001845 // COL4A1 // collagen, type IV, alpha 1 // 13q34 // 1282 /// CR593711	0.170425	0	0.0018646	0	5.12515	5.12515	1.00784	9.51557	5.61311	5.61311	0.915774	9.93862	0.170425	-0.487963	NM_001845 // RefSeq // Homo sapiens collagen, type IV, alpha 1 (COL4A1), mRNA. /	NM_001845
12	3549551	ENST00000298901 // ENSEMBL Transcript // family with sequence similarity 14, mem	NM_145249 // Hs.19414 // testis; pharynx; embryonic tissue; brain; eye; whole br	chr14	+	93616599	93638805	79	NM_145249 // FAM14B // family with sequence similarity 14, member B // 14q32.13	0.324272	0	0.00192623	1.05449e-12	5.50488	5.50488	1.9142	8.97208	5.81281	5.81281	1.7929	9.408	0.324272	-0.307937	ENST00000298901 // ENSEMBL Transcript // family with sequence similarity 14, mem	ENST00000298901
29	3850409	NM_178159 // RefSeq // Homo sapiens hypothetical protein FLJ12949 (FLJ12949), tr	NM_178159 // Hs.646387 // brain; whole brain; pancreas; amniotic fluid; thymus;	chr19	-	10524767	10537693	134	NM_178159 // FLJ12949 // hypothetical protein FLJ12949 // 19p13.2 // 65095 /// N	0.213858	0	0.00193635	0	5.95673	5.95673	2.29906	9.52806	6.37232	6.37232	2.91275	10.1078	0.213858	-0.415585	NM_178159 // RefSeq // Homo sapiens hypothetical protein FLJ12949 (FLJ12949), tr	NM_178159
23	3122489	NM_001147 // RefSeq // Homo sapiens angiopoietin 2 (ANGPT2), mRNA. // chr8 // 10	NM_001147 // Hs.583870 // placenta; brain; mammary gland; vascular; mixed; pancr	chr8	-	6346518	6430411	165	NM_001147 // ANGPT2 // angiopoietin 2 // 8p23.1 // 285 /// AJ289781 // ANGPT2 //	0.0691079	0	0.00196506	1.30145e-33	4.62127	4.62127	1.22672	8.52567	5.20159	5.20159	1.13086	8.86681	0.0691079	-0.580323	NM_001147 // RefSeq // Homo sapiens angiopoietin 2 (ANGPT2), mRNA. // chr8 // 10	NM_001147
7	3720388	NM_002686 // RefSeq // Homo sapiens phenylethanolamine N-methyltransferase (PNMT	NM_002686 // Hs.1892 // brain; adrenal gland; eye; uncharacterized tissue; uteru	chr17	+	35077780	35080252	25	NM_002686 // PNMT // phenylethanolamine N-methyltransferase // 17q21-q22 // 5409	0.101472	9.85705e-30	0.0019713	1.93525e-10	4.79393	4.79393	1.38469	7.09975	5.46337	5.46337	1.92247	8.14374	0.101472	-0.669437	NM_002686 // RefSeq // Homo sapiens phenylethanolamine N-methyltransferase (PNMT	NM_002686
16	3633578	NM_001897 // RefSeq // Homo sapiens chondroitin sulfate proteoglycan 4 (melanoma	NM_001897 // Hs.513044 // skin; brain; colon; uncharacterized tissue; bone; kidn	chr15	-	73753720	73792201	109	NM_001897 // CSPG4 // chondroitin sulfate proteoglycan 4 (melanoma-associated) /	0.143176	0	0.00199668	7.00649e-45	5.61756	5.61756	1.46103	8.98501	6.13479	6.13479	2.14742	9.46274	0.143176	-0.517233	NM_001897 // RefSeq // Homo sapiens chondroitin sulfate proteoglycan 4 (melanoma	NM_001897
43	3303478	NM_015490 // RefSeq // Homo sapiens SEC31 homolog B (S. cerevisiae) (SEC31B), mR	NM_015490 // Hs.18889 // brain; thymus; uncharacterized tissue; testis; small in	chr10	-	102236395	102269591	191	NM_015490 // SEC31B // SEC31 homolog B (S. cerevisiae) // 10q24.31 // 25956 ///	0.250348	0	0.00200195	0	5.68165	5.68165	2.01112	8.85854	6.11047	6.11047	2.09125	9.2265	0.250348	-0.428812	NM_015490 // RefSeq // Homo sapiens SEC31 homolog B (S. cerevisiae) (SEC31B), mR	NM_015490
23	3903089	NM_031232 // RefSeq // Homo sapiens amyloid beta (A4) precursor protein-binding,	NM_031232 // Hs.516986 // brain; uncharacterized tissue; mixed; pancreas; whole	chr20	-	31699669	31726588	138	NM_031232 // APBA2BP // amyloid beta (A4) precursor protein-binding, family A, m	0.185607	0	0.00201311	0	6.41361	6.41361	2.3906	9.33791	6.91172	6.91172	2.46982	9.79988	0.185607	-0.498112	NM_031232 // RefSeq // Homo sapiens amyloid beta (A4) precursor protein-binding,	NM_031232
30	4000944	NM_002893 // RefSeq // Homo sapiens retinoblastoma binding protein 7 (RBBP7), mR	NM_002893 // Hs.495755 // testis; brain; uterus; placenta; lung; uncharacterized	chrX	-	16767347	16806316	153	NM_002893 // RBBP7 // retinoblastoma binding protein 7 // Xp22.2 // 5931 /// AK0	0.171262	0	0.00203902	0	6.33758	6.33758	1.76812	10.8678	6.79214	6.79214	2.20117	11.3736	0.171262	-0.454561	NM_002893 // RefSeq // Homo sapiens retinoblastoma binding protein 7 (RBBP7), mR	NM_002893
2	3224336	NM_001004450 // RefSeq // Homo sapiens olfactory receptor, family 1, subfamily B	NM_001004450 // Hs.553710 // mixed	chr9	-	124430679	124431632	8	NM_001004450 // OR1B1 // olfactory receptor, family 1, subfamily B, member 1 //	0.0220918	0.895669	0.00205268	0.000357845	4.27793	4.27793	2.99631	5.23828	5.17206	5.17206	3.64087	6.31128	0.0220918	-0.894137	NM_001004450 // RefSeq // Homo sapiens olfactory receptor, family 1, subfamily B	NM_001004450
52	3469319	NM_018171 // RefSeq // Homo sapiens DIP13 beta (DIP13B), mRNA. // chr12 // 100 /	NM_018171 // Hs.506603 // connective tissue; liver; pituitary gland; prostate; e	chr12	-	104091210	104154138	267	NM_018171 // DIP13B // DIP13 beta // 12q24.1 // 55198	0.210419	0	0.00206249	0	6.15793	6.15793	1.31761	9.92957	6.57404	6.57404	1.9724	10.2512	0.210419	-0.416117	NM_018171 // RefSeq // Homo sapiens DIP13 beta (DIP13B), mRNA. // chr12 // 100 /	NM_018171
7	3334484	NM_004451 // RefSeq // Homo sapiens estrogen-related receptor alpha (ESRRA), mRN	NM_004451 // Hs.110849 // ascites; lung; brain; uncharacterized tissue; kidney;	chr11	+	63829577	63840786	49	NM_004451 // ESRRA // estrogen-related receptor alpha // 11q13 // 2101 /// BC092	0.216046	0	0.00206977	6.24091e-18	6.28648	6.28648	1.87839	10.087	6.70363	6.70363	2.97125	10.4773	0.216046	-0.417152	NM_004451 // RefSeq // Homo sapiens estrogen-related receptor alpha (ESRRA), mRN	NM_004451
50	3537967	NM_014749 // RefSeq // Homo sapiens KIAA0586 (KIAA0586), mRNA. // chr14 // 100 /	NM_014749 // Hs.232532 // mixed; testis; embryonic tissue; muscle; whole brain;	chr14	+	57963831	58085278	376	NM_014749 // KIAA0586 // KIAA0586 // 14q23.1 // 9786 /// BC066647 // KIAA0586 //	0.526852	0	0.00209162	0	5.49422	5.49422	1.01041	9.38746	5.69553	5.69553	1.32335	10.0854	0.526852	-0.201304	NM_014749 // RefSeq // Homo sapiens KIAA0586 (KIAA0586), mRNA. // chr14 // 100 /	NM_014749
9	2828757	NM_175873 // RefSeq // Homo sapiens ankyrin repeat domain 43 (ANKRD43), mRNA. //	NM_175873 // Hs.13308 // brain; small intestine; uncharacterized tissue; kidney;	chr5	+	132177213	132180376	34	NM_175873 // ANKRD43 // ankyrin repeat domain 43 // 5q31.1 // 134548	0.340265	0	0.00210029	1.2433e-29	7.92549	7.92549	4.42128	10.3335	8.24316	8.24316	5.73766	10.6084	0.340265	-0.317664	NM_175873 // RefSeq // Homo sapiens ankyrin repeat domain 43 (ANKRD43), mRNA. //	NM_175873
13	2953777	NM_006653 // RefSeq // Homo sapiens fibroblast growth factor receptor substrate	NM_006653 // Hs.194208 // brain; uncharacterized tissue; lung; blood; thyroid; s	chr6	-	41845892	41856162	55	NM_006653 // FRS3 // fibroblast growth factor receptor substrate 3 // 6p21.1 //	0.231601	0	0.00211109	3.09082e-32	6.18341	6.18341	1.39804	10.547	6.55738	6.55738	1.47262	10.924	0.231601	-0.373977	NM_006653 // RefSeq // Homo sapiens fibroblast growth factor receptor substrate	NM_006653
20	3240629	GENSCAN00000057571 // ENSEMBL Prediction // cdna:Genscan chromosome:NCBI36:10:2	NM_032517 // Hs.522610 // uncharacterized tissue; mixed; testis; connective tiss	chr10	+	29531207	29697301	183	NM_183058 // LYZL2 // lysozyme-like 2 // 10p11.23 // 119180 /// NM_032517 // LYZ	0.187616	0	0.00212959	1.1694e-32	3.66525	3.66525	1.27765	6.57067	4.02709	4.02709	1.30886	6.99276	0.187616	-0.361835	GENSCAN00000057571 // ENSEMBL Prediction // cdna:Genscan chromosome:NCBI36:10:2	GENSCAN00000057571
28	3910360	NM_003657 // RefSeq // Homo sapiens breast carcinoma amplified sequence 1 (BCAS1	NM_003657 // Hs.400556 // brain; colon; mammary gland; mixed; prostate; whole br	chr20	-	51991284	52120781	159	NM_003657 // BCAS1 // breast carcinoma amplified sequence 1 // 20q13.2-q13.3 //	0.481864	0	0.00213474	1.37327e-43	6.19431	6.19431	1.74119	10.4184	6.41235	6.41235	1.48656	11.0157	0.481864	-0.218042	NM_003657 // RefSeq // Homo sapiens breast carcinoma amplified sequence 1 (BCAS1	NM_003657
34	4021341	NM_001008222 // RefSeq // Homo sapiens zinc finger, DHHC-type containing 9 (ZDHH	NM_001008222 // Hs.193566 // brain; kidney; whole brain; mammary gland; mouth; h	chrX	-	128759109	128805645	171	NM_001008222 // ZDHHC9 // zinc finger, DHHC-type containing 9 // Xq26.1 // 51114	0.215251	0	0.00215694	0	5.95523	5.95523	0.89135	9.7625	6.43222	6.43222	0.77454	11.3951	0.215251	-0.476996	NM_001008222 // RefSeq // Homo sapiens zinc finger, DHHC-type containing 9 (ZDHH	NM_001008222
48	3457455	NM_003075 // RefSeq // Homo sapiens SWI/SNF related, matrix associated, actin de	NM_003075 // Hs.236030 // brain; lung; pancreas; whole body; placenta; uterus; u	chr12	-	54842369	54870314	228	NM_003075 // SMARCC2 // SWI/SNF related, matrix associated, actin dependent regu	0.210117	0	0.00216401	0	7.2788	7.2788	1.06029	11.4927	7.66985	7.66985	1.44457	11.832	0.210117	-0.391042	NM_003075 // RefSeq // Homo sapiens SWI/SNF related, matrix associated, actin de	NM_003075
29	3869650	NM_018300 // RefSeq // Homo sapiens zinc finger protein 83 (ZNF83), mRNA. // chr	NM_018300 // Hs.467210 // brain; colon; placenta; uterus; ovary; dorsal root gan	chr19	-	57807100	57891405	217	NM_018300 // ZNF83 // zinc finger protein 83 // 19q13.3 // 55769 /// BC032867 //	0.422503	0	0.00218208	0	5.70552	5.70552	1.4929	8.84288	5.9484	5.9484	1.81289	8.96193	0.422503	-0.242879	NM_018300 // RefSeq // Homo sapiens zinc finger protein 83 (ZNF83), mRNA. // chr	NM_018300
17	3866541	NM_015063 // RefSeq // Homo sapiens solute carrier family 8 (sodium-calcium exch	NM_015063 // Hs.172884 // brain; whole brain; embryonic tissue; placenta; testis	chr19	-	52623093	52666924	96	NM_015063 // SLC8A2 // solute carrier family 8 (sodium-calcium exchanger), membe	0.154614	0	0.00219761	0	7.4288	7.4288	2.77983	10.3475	7.96835	7.96835	3.72227	10.6496	0.154614	-0.53955	NM_015063 // RefSeq // Homo sapiens solute carrier family 8 (sodium-calcium exch	NM_015063
70	3779817	NM_032142 // RefSeq // Homo sapiens centrosomal protein 192kDa (CEP192), mRNA. /	NM_032142 // Hs.100914 // mixed; brain; eye; ovary; placenta; testis; lymph node	chr18	+	12981363	13222986	459	NM_032142 // CEP192 // centrosomal protein 192kDa // 18p11.21 // 55125 /// BX649	0.30586	0	0.00219825	0	5.52802	5.52802	0.706498	8.88388	5.90038	5.90038	0.787366	9.53753	0.30586	-0.372355	NM_032142 // RefSeq // Homo sapiens centrosomal protein 192kDa (CEP192), mRNA. /	NM_032142
21	2830861	NM_001964 // RefSeq // Homo sapiens early growth response 1 (EGR1), mRNA. // chr	NM_001964 // Hs.326035 // lung; connective tissue; mixed; epididymis; colon; mam	chr5	+	137820813	137837733	150	NM_001964 // EGR1 // early growth response 1 // 5q31.1 // 1958 /// M24019 // EGR	0.0520256	0	0.00220729	0	6.93659	6.93659	2.94445	9.83521	7.73273	7.73273	2.84187	12.0511	0.0520256	-0.796141	NM_001964 // RefSeq // Homo sapiens early growth response 1 (EGR1), mRNA. // chr	NM_001964
28	3664664	NM_001795 // RefSeq // Homo sapiens cadherin 5, type 2, VE-cadherin (vascular ep	NM_001795 // Hs.76206 // placenta; brain; vascular; mixed; cranial nerve; uterus	chr16	+	64913118	64996185	150	NM_001795 // CDH5 // cadherin 5, type 2, VE-cadherin (vascular epithelium) // 16	0.239296	0	0.00225092	0	5.32739	5.32739	1.04111	7.96004	5.73699	5.73699	0.969542	8.43065	0.239296	-0.409593	NM_001795 // RefSeq // Homo sapiens cadherin 5, type 2, VE-cadherin (vascular ep	NM_001795
12	3221646	NM_017443 // RefSeq // Homo sapiens polymerase (DNA directed), epsilon 3 (p17 su	NM_017443 // Hs.108112 // brain; testis; uncharacterized tissue; eye; mammary gl	chr9	-	115209358	115212773	54	NM_017443 // POLE3 // polymerase (DNA directed), epsilon 3 (p17 subunit) // 9q33	0.260337	0	0.00225256	7.06192e-13	5.95625	5.95625	2.5267	9.46339	6.26449	6.26449	2.57925	9.45451	0.260337	-0.308235	NM_017443 // RefSeq // Homo sapiens polymerase (DNA directed), epsilon 3 (p17 su	NM_017443
2	4025694	XM_001126374 // RefSeq // PREDICTED: Homo sapiens hypothetical protein LOC728020	XM_001126374 // Hs.648361 // uncharacterized tissue; testis	chrX	-	149282610	149283009	8	XM_001126374 // LOC728020 // hypothetical protein LOC728020 // Xq28 // 728020 //	0.021517	3.08845e-09	0.0022641	0.0161512	6.22442	6.22442	3.7794	7.54149	6.83524	6.83524	5.77703	8.30554	0.021517	-0.610813	XM_001126374 // RefSeq // PREDICTED: Homo sapiens hypothetical protein LOC728020	XM_001126374
2	3648747	GENSCAN00000036352 // ENSEMBL Prediction // cdna:Genscan chromosome:NCBI36:16:1	AK026542 // Hs.529631 // prostate; mixed; embryonic tissue; muscle; lung; brain;	chr16	+	12875032	12892968	25	AK026542 // RPL35A // ribosomal protein L35a // 3q29-qter // 6165	0.0258671	1.58336e-09	0.00229494	0.0640177	3.10219	3.10219	1.79509	4.23795	3.55144	3.55144	2.11799	5.40301	0.0258671	-0.44925	GENSCAN00000036352 // ENSEMBL Prediction // cdna:Genscan chromosome:NCBI36:16:1	GENSCAN00000036352
84	3400034	NM_018979 // RefSeq // Homo sapiens WNK lysine deficient protein kinase 1 (WNK1)	NM_018979 // Hs.356604 // brain; mixed; testis; uncharacterized tissue; lung; ly	chr12	+	278104	891189	580	NM_018979 // WNK1 // WNK lysine deficient protein kinase 1 // 12p13.3 // 65125 /	0.524283	0	0.00230041	0	7.36103	7.36103	1.26606	10.9099	7.5975	7.5975	1.11664	11.5602	0.524283	-0.236466	NM_018979 // RefSeq // Homo sapiens WNK lysine deficient protein kinase 1 (WNK1)	NM_018979
9	2786098	NM_017489 // RefSeq // Homo sapiens telomeric repeat binding factor (NIMA-intera	NM_017489 // Hs.442707 // embryonic tissue; uncharacterized tissue; brain; lung;	chr4	-	137458889	137635950	70	NM_017489 // TERF1 // telomeric repeat binding factor (NIMA-interacting) 1 // 8q	0.491388	0	0.00235609	1.32796e-09	3.77439	3.77439	1.35221	8.00438	3.59751	3.59751	1.36975	8.46292	0.491388	0.17688	NM_017489 // RefSeq // Homo sapiens telomeric repeat binding factor (NIMA-intera	NM_017489
39	3739867	NM_022463 // RefSeq // Homo sapiens nucleoredoxin (NXN), mRNA. // chr17 // 100 /	NM_022463 // Hs.527989 // lung; prostate; pancreas; brain; mammary gland; colon;	chr17	-	649347	829755	324	NM_022463 // NXN // nucleoredoxin // 17p13.3 // 64359 /// BC073845 // NXN // nuc	0.100543	0	0.00235973	0	5.36865	5.36865	1.50104	10.1675	5.86008	5.86008	1.89833	10.854	0.100543	-0.491434	NM_022463 // RefSeq // Homo sapiens nucleoredoxin (NXN), mRNA. // chr17 // 100 /	NM_022463
33	3818268	NM_030924 // RefSeq // Homo sapiens acyl-CoA synthetase bubblegum family member	NM_030924 // Hs.465720 // testis; brain; mixed; whole brain; pancreas; pituitary	chr19	+	6025806	6156128	183	NM_030924 // ACSBG2 // acyl-CoA synthetase bubblegum family member 2 // 19p13.3	0.404256	0	0.00236986	3.55225e-37	4.17692	4.17692	1.19341	8.05979	4.38285	4.38285	0.987177	8.36114	0.404256	-0.205925	NM_030924 // RefSeq // Homo sapiens acyl-CoA synthetase bubblegum family member	NM_030924
39	3361870	AB002296 // GenBank // Homo sapiens mRNA for KIAA0298 protein, partial cds. // c	AB002296 // Hs.130836 // uncharacterized tissue; testis; whole brain; mixed; bra	chr11	-	8593089	8641333	265	AB002296 // TRIM66 // tripartite motif-containing 66 // 11p15.4 // 9866	0.192817	0	0.00237812	0	5.60132	5.60132	2.0746	9.12651	6.05246	6.05246	1.46373	9.00308	0.192817	-0.451139	AB002296 // GenBank // Homo sapiens mRNA for KIAA0298 protein, partial cds. // c	AB002296
5	3263466	XR_016869 // RefSeq // PREDICTED: Homo sapiens similar to B-cell receptor-associ	XR_016869 // Hs.647187 // pineal gland	chr10	+	111277867	111278476	20	XR_016869 // LOC645318 // similar to B-cell receptor-associated protein 37 // 10	0.286116	4.59474e-15	0.00243608	2.42087e-05	3.35222	3.35222	1.35705	5.53371	3.64034	3.64034	1.46061	5.86421	0.286116	-0.28812	XR_016869 // RefSeq // PREDICTED: Homo sapiens similar to B-cell receptor-associ	XR_016869
16	2673136	NM_005793 // RefSeq // Homo sapiens non-metastatic cells 6, protein expressed in	NM_005793 // Hs.465558 // testis; small intestine; skin; vascular; colon; uterus	chr3	-	48302202	48318014	83	NM_005793 // NME6 // non-metastatic cells 6, protein expressed in (nucleoside-di	0.0659035	0	0.00245263	5.69586e-19	4.53938	4.53938	1.63774	7.22334	5.06435	5.06435	2.41191	7.41601	0.0659035	-0.524969	NM_005793 // RefSeq // Homo sapiens non-metastatic cells 6, protein expressed in	NM_005793
65	3496637	NM_005708 // RefSeq // Homo sapiens glypican 6 (GPC6), mRNA. // chr13 // 100 //	NM_005708 // Hs.444329 // mixed; mammary gland; liver; brain; uncharacterized ti	chr13	+	92676866	93863874	744	NM_005708 // GPC6 // glypican 6 // 13q32 // 10082	0.219912	0	0.00249362	0	4.13433	4.13433	1.12724	8.29435	4.52422	4.52422	0.911138	8.98035	0.219912	-0.38989	NM_005708 // RefSeq // Homo sapiens glypican 6 (GPC6), mRNA. // chr13 // 100 //	NM_005708
13	3715173	BC112354 // GenBank // Homo sapiens similar to ubiquitin specific protease 6, mR	BC112354 // Hs.385755 // mixed; testis; brain /// BC037244 // Hs.385755 // mixed	chr17	+	22769075	22802108	85	BC112354 // LOC440419 // similar to ubiquitin specific protease 6 // 17q11.1 //	0.143236	0	0.00251686	3.92795e-26	4.91635	4.91635	1.35089	9.24912	5.43096	5.43096	1.97034	10.178	0.143236	-0.514615	BC112354 // GenBank // Homo sapiens similar to ubiquitin specific protease 6, mR	BC112354
55	2677653	NM_015224 // RefSeq // Homo sapiens chromosome 3 open reading frame 63 (C3orf63)	NM_015224 // Hs.116877 // uncharacterized tissue; brain; mixed; colon; kidney; h	chr3	-	56629203	56692517	259	NM_015224 // C3orf63 // chromosome 3 open reading frame 63 // 3p14.3 // 23272 //	0.404425	0	0.00252848	0	6.10007	6.10007	1.0301	9.81036	6.40496	6.40496	1.16732	9.93678	0.404425	-0.304895	NM_015224 // RefSeq // Homo sapiens chromosome 3 open reading frame 63 (C3orf63)	NM_015224
26	2678468	NM_138805 // RefSeq // Homo sapiens family with sequence similarity 3, member D	NM_138805 // Hs.61265 // colon; stomach; larynx; lung; rectum; small intestine;	chr3	-	58594750	58647340	166	NM_138805 // FAM3D // family with sequence similarity 3, member D // 3p14.2 // 1	0.165906	0	0.0025464	0	4.48892	4.48892	0.841935	7.80071	4.90391	4.90391	0.871403	8.46642	0.165906	-0.414992	NM_138805 // RefSeq // Homo sapiens family with sequence similarity 3, member D	NM_138805
11	3704682	ENST00000333222 // ENSEMBL Transcript // hypothetical protein LOC146429, transcr	AL137382 // Hs.447544 // embryonic tissue; prostate; lung; mammary gland; unchar	chr16	-	87789680	87795573	60	AL137382 // LOC146429 // hypothetical protein LOC146429 // 16q24.3 // 146429 ///	0.20977	0	0.00256878	7.66325e-23	5.32676	5.32676	2.95719	8.07026	5.71355	5.71355	2.77402	8.50682	0.20977	-0.386785	ENST00000333222 // ENSEMBL Transcript // hypothetical protein LOC146429, transcr	ENST00000333222
21	2548274	NM_003162 // RefSeq // Homo sapiens striatin, calmodulin binding protein (STRN),	NM_003162 // Hs.631884 // colon; embryonic tissue; larynx; stomach; thyroid; con	chr2	-	36928976	37047234	164	NM_003162 // STRN // striatin, calmodulin binding protein // 2p22-p21 // 6801 //	0.321149	0	0.00258348	0	7.40106	7.40106	2.17912	10.141	7.76142	7.76142	1.50915	11.737	0.321149	-0.360359	NM_003162 // RefSeq // Homo sapiens striatin, calmodulin binding protein (STRN),	NM_003162
36	2881187	NM_005211 // RefSeq // Homo sapiens colony stimulating factor 1 receptor, former	NM_005211 // Hs.483829 // brain; placenta; bone marrow; mixed; uterus; whole bra	chr5	-	149412410	149473128	194	NM_005211 // CSF1R // colony stimulating factor 1 receptor, formerly McDonough f	0.0969341	0	0.00258775	0	5.86048	5.86048	1.82908	9.65321	6.56914	6.56914	2.65596	10.2118	0.0969341	-0.708657	NM_005211 // RefSeq // Homo sapiens colony stimulating factor 1 receptor, former	NM_005211
142	2371873	NM_031935 // RefSeq // Homo sapiens hemicentin 1 (HMCN1), mRNA. // chr1 // 100 /	NM_031935 // Hs.58877 // mouth; lung; pharynx; mammary gland; brain; uncharacter	chr1	+	183904563	184426704	674	NM_031935 // HMCN1 // hemicentin 1 // 1q25.3-q31.1 // 83872 /// AK056336 // HMCN	0.120931	0	0.00262104	0	3.62471	3.62471	1.00971	8.20906	4.03067	4.03067	1.10631	8.12778	0.120931	-0.405956	NM_031935 // RefSeq // Homo sapiens hemicentin 1 (HMCN1), mRNA. // chr1 // 100 /	NM_031935
17	2969201	AK124171 // GenBank // Homo sapiens cDNA FLJ42177 fis, clone THYMU2030264. // ch	AK124171 // Hs.205144 // mixed; mammary gland; uterus; brain; pituitary gland; c	chr6	-	110052801	110119333	129	AK124171 // FLJ42177 // FLJ42177 protein // 6q21 // 401271 /// NM_145025 // C6or	0.724313	0	0.00265446	1.32157e-27	6.01005	6.01005	1.41135	9.01727	6.11972	6.11972	1.50753	9.28507	0.724313	-0.109673	AK124171 // GenBank // Homo sapiens cDNA FLJ42177 fis, clone THYMU2030264. // ch	AK124171
4	3655621	NM_152338 // RefSeq // Homo sapiens zymogen granule protein 16 (ZG16), mRNA. //	NM_152338 // Hs.632195 // colon; uncharacterized tissue; rectum; pancreas; small	chr16	+	29697098	29700587	24	NM_152338 // ZG16 // zymogen granule protein 16 // 16p13.3 // 123887 /// XM_9300	0.173498	1.1212e-24	0.0026557	2.51009e-07	4.49027	4.49027	1.63624	7.10754	4.90762	4.90762	2.7957	7.7123	0.173498	-0.417343	NM_152338 // RefSeq // Homo sapiens zymogen granule protein 16 (ZG16), mRNA. //	NM_152338
23	3846290	XM_933013 // RefSeq // PREDICTED: Homo sapiens chromosome 19 open reading frame	XM_933013 // Hs.128425 // lymph node; kidney; uncharacterized tissue; embryonic	chr19	-	3561649	3577857	96	XM_933013 // C19orf29 // chromosome 19 open reading frame 29 // 19p13.3 // 58509	0.128661	0	0.00267894	0	6.34737	6.34737	2.5816	9.8159	6.80453	6.80453	2.37295	10.2982	0.128661	-0.457156	XM_933013 // RefSeq // PREDICTED: Homo sapiens chromosome 19 open reading frame	XM_933013
20	3215041	NM_001007101 // RefSeq // Homo sapiens zinc finger protein 484 (ZNF484), transcr	NM_001007101 // Hs.633635 // kidney; thyroid; embryonic tissue; mammary gland; u	chr9	-	94640324	94699330	100	NM_001007101 // ZNF484 // zinc finger protein 484 // 9q22.31 // 83744 /// NM_031	0.29011	0	0.00269	5.97064e-34	5.25826	5.25826	1.12806	8.71375	5.60838	5.60838	1.68093	8.76372	0.29011	-0.350124	NM_001007101 // RefSeq // Homo sapiens zinc finger protein 484 (ZNF484), transcr	NM_001007101
26	3416996	ENST00000379627 // ENSEMBL Transcript // Similar to RIKEN cDNA 1110012D08 gene:E	AY358778 // Hs.616500 // brain; testis; mixed; cranial nerve; whole brain; prost	chr12	+	54509679	54516290	119	AY358778 // LOC440104 // similar to RIKEN cDNA 1110012D08 // 12q13.2 // 440104 /	0.140052	0	0.00269195	0	5.68972	5.68972	0.578492	9.52685	6.26041	6.26041	2.92921	10.3879	0.140052	-0.570688	ENST00000379627 // ENSEMBL Transcript // Similar to RIKEN cDNA 1110012D08 gene:E	ENST00000379627
40	3165825	NM_000459 // RefSeq // Homo sapiens TEK tyrosine kinase, endothelial (venous mal	NM_000459 // Hs.89640 // brain; placenta; embryonic tissue; uncharacterized tiss	chr9	+	27061087	27220160	208	NM_000459 // TEK // TEK tyrosine kinase, endothelial (venous malformations, mult	0.190145	0	0.00273339	0	5.25198	5.25198	1.61921	8.30127	5.67371	5.67371	1.27934	9.0487	0.190145	-0.421724	NM_000459 // RefSeq // Homo sapiens TEK tyrosine kinase, endothelial (venous mal	NM_000459
42	2696113	NM_005630 // RefSeq // Homo sapiens solute carrier organic anion transporter fam	NM_005630 // Hs.518270 // pancreas; connective tissue; adrenal gland; trachea; p	chr3	-	135133070	135231519	283	NM_005630 // SLCO2A1 // solute carrier organic anion transporter family, member	0.0923789	0	0.00276328	0	5.08265	5.08265	1.01138	8.35253	5.54235	5.54235	1.3342	8.89937	0.0923789	-0.459692	NM_005630 // RefSeq // Homo sapiens solute carrier organic anion transporter fam	NM_005630
21	3748126	NM_145691 // RefSeq // Homo sapiens ATP synthase mitochondrial F1 complex assemb	NM_145691 // Hs.528889 // brain; testis; mixed; whole brain; uncharacterized tis	chr17	-	17859098	17883206	93	NM_145691 // ATPAF2 // ATP synthase mitochondrial F1 complex assembly factor 2 /	0.146942	0	0.00278427	0	5.46737	5.46737	0.979089	8.14741	5.99767	5.99767	1.45991	8.3964	0.146942	-0.530304	NM_145691 // RefSeq // Homo sapiens ATP synthase mitochondrial F1 complex assemb	NM_145691
9	3086915	BC031245 // GenBank // Homo sapiens chromosome 8 open reading frame 48, mRNA (cD	BC031245 // Hs.104941 // testis; embryonic tissue; mixed; eye; bladder; thyroid;	chr8	+	13437769	13470163	49	BC031245 // C8orf48 // chromosome 8 open reading frame 48 // 8p22 // 157773 ///	0.209345	2.8026e-45	0.00279289	2.81984e-17	4.73702	4.73702	1.78767	7.80269	5.14173	5.14173	1.62359	7.88512	0.209345	-0.404713	BC031245 // GenBank // Homo sapiens chromosome 8 open reading frame 48, mRNA (cD	BC031245
19	3874402	NM_052970 // RefSeq // Homo sapiens heat shock 70kD protein 12B (HSPA12B), mRNA.	NM_052970 // Hs.516854 // placenta; kidney; heart; other; prostate; colon; cervi	chr20	+	3661334	3681750	75	NM_052970 // HSPA12B // heat shock 70kD protein 12B // 20p13 // 116835	0.126011	0	0.00283217	1.4013e-45	6.01923	6.01923	2.39527	11.6418	6.50497	6.50497	3.67379	11.8261	0.126011	-0.485737	NM_052970 // RefSeq // Homo sapiens heat shock 70kD protein 12B (HSPA12B), mRNA.	NM_052970
18	4012178	NM_004143 // RefSeq // Homo sapiens Cbp/p300-interacting transactivator, with Gl	NM_004143 // Hs.40403 // skin; kidney; brain; eye; testis; uncharacterized tissu	chrX	-	71438228	71456288	99	NM_004143 // CITED1 // Cbp/p300-interacting transactivator, with Glu/Asp-rich ca	0.177191	0	0.00283892	2.26467e-40	5.48653	5.48653	1.79142	9.47595	5.92936	5.92936	2.265	9.91094	0.177191	-0.442829	NM_004143 // RefSeq // Homo sapiens Cbp/p300-interacting transactivator, with Gl	NM_004143
20	3678316	NM_021646 // RefSeq // Homo sapiens zinc finger protein 500 (ZNF500), mRNA. // c	NM_021646 // Hs.513316 // brain; whole brain; lung; placenta; uncharacterized ti	chr16	-	4738245	4757606	88	NM_021646 // ZNF500 // zinc finger protein 500 // 16p13.3 // 26048 /// BC033151	0.18896	0	0.00291008	2.25074e-38	5.80142	5.80142	1.9234	9.74389	6.17455	6.17455	2.05841	10.4389	0.18896	-0.373126	NM_021646 // RefSeq // Homo sapiens zinc finger protein 500 (ZNF500), mRNA. // c	NM_021646
35	3261643	NM_001077494 // RefSeq // Homo sapiens nuclear factor of kappa light polypeptide	NM_001077494 // Hs.73090 // lung; uncharacterized tissue; embryonic tissue; brai	chr10	+	104144262	104152716	152	NM_001077494 // NFKB2 // nuclear factor of kappa light polypeptide gene enhancer	0.0884858	0	0.00293995	0	5.52794	5.52794	2.52117	9.73273	6.04899	6.04899	2.68617	10.2705	0.0884858	-0.521044	NM_001077494 // RefSeq // Homo sapiens nuclear factor of kappa light polypeptide	NM_001077494
26	3646164	NM_005147 // RefSeq // Homo sapiens DnaJ (Hsp40) homolog, subfamily A, member 3	NM_005147 // Hs.459779 // brain; testis; ovary; connective tissue; vascular; lun	chr16	+	4415465	4446773	117	NM_005147 // DNAJA3 // DnaJ (Hsp40) homolog, subfamily A, member 3 // 16p13.3 //	0.184271	0	0.00302778	0	5.70829	5.70829	0.98109	9.02082	6.13119	6.13119	1.00914	9.19527	0.184271	-0.422897	NM_005147 // RefSeq // Homo sapiens DnaJ (Hsp40) homolog, subfamily A, member 3	NM_005147
2	3084704	AK094835 // GenBank // Homo sapiens cDNA FLJ37516 fis, clone BRCAN2000832. // na	AK094835 // Hs.559040 // kidney; uncharacterized tissue; thyroid; uterus; embryo	chr8	+	7879639	7905472	29	AK094835 // LOC349196 // hypothetical protein LOC349196 // 8p23.1 // 349196	0.158612	0.000241298	0.00306583	0.00939938	6.15742	6.15742	2.9893	8.01645	6.87733	6.87733	5.42035	8.6279	0.158612	-0.719906	AK094835 // GenBank // Homo sapiens cDNA FLJ37516 fis, clone BRCAN2000832. // na	AK094835
9	2678005	U53532 // GenBank // Human cytoplasmic dynein 3 heavy chain mRNA, partial cds. /	U53532 // Hs.381296 // mixed /// Z83802 // Hs.381296 // mixed /// U61739 // Hs.3	chr3	-	57405941	57415661	39	U53532 // DNAH12 // dynein, axonemal, heavy chain 12 // 3p21.1 // 8679 /// Z8380	0.175756	0	0.00307541	3.94966e-14	4.13813	4.13813	1.99225	8.59851	4.49285	4.49285	2.56176	8.92935	0.175756	-0.354724	U53532 // GenBank // Human cytoplasmic dynein 3 heavy chain mRNA, partial cds. /	U53532
9	3862650	NM_203344 // RefSeq // Homo sapiens SERTA domain containing 3 (SERTAD3), transcr	NM_203344 // Hs.515412 // placenta; blood; stomach; prostate; embryonic tissue;	chr19	-	45638593	45642181	40	NM_203344 // SERTAD3 // SERTA domain containing 3 // 19q13.2 // 29946 /// NM_013	0.0991595	0	0.00307805	3.02154e-18	4.8885	4.8885	1.97453	7.44336	5.4343	5.4343	1.92147	8.02986	0.0991595	-0.545802	NM_203344 // RefSeq // Homo sapiens SERTA domain containing 3 (SERTAD3), transcr	NM_203344
31	2496907	NM_004633 // RefSeq // Homo sapiens interleukin 1 receptor, type II (IL1R2), tra	NM_004633 // Hs.25333 // uncharacterized tissue; lymph node; colon; mouth; place	chr2	+	101974738	102019266	157	NM_004633 // IL1R2 // interleukin 1 receptor, type II // 2q12-q22 // 7850 /// NM	0.206369	0	0.00314677	0	4.71129	4.71129	1.25913	8.77804	5.0671	5.0671	1.1171	9.20457	0.206369	-0.355811	NM_004633 // RefSeq // Homo sapiens interleukin 1 receptor, type II (IL1R2), tra	NM_004633
26	2949352	NM_006295 // RefSeq // Homo sapiens valyl-tRNA synthetase (VARS), mRNA. // chr6	NM_006295 // Hs.520026 // brain; skin; uncharacterized tissue; mixed; embryonic	chr6	-	31841350	31853050	102	NM_006295 // VARS // valyl-tRNA synthetase // 6p21.3 // 7407 /// NM_025258 // C6	0.166766	0	0.00315325	0	5.87485	5.87485	2.5849	8.33668	6.35682	6.35682	2.63887	9.15636	0.166766	-0.481966	NM_006295 // RefSeq // Homo sapiens valyl-tRNA synthetase (VARS), mRNA. // chr6	NM_006295
28	3907524	NM_006227 // RefSeq // Homo sapiens phospholipid transfer protein (PLTP), transc	NM_006227 // Hs.439312 // placenta; brain; uncharacterized tissue; mixed; embryo	chr20	-	43959330	43974262	122	NM_006227 // PLTP // phospholipid transfer protein // 20q12-q13.1 // 5360 /// NM	0.152532	0	0.0032102	0	6.35211	6.35211	1.86469	9.20505	6.98447	6.98447	1.94306	9.99036	0.152532	-0.632358	NM_006227 // RefSeq // Homo sapiens phospholipid transfer protein (PLTP), transc	NM_006227
30	3418249	NM_004984 // RefSeq // Homo sapiens kinesin family member 5A (KIF5A), mRNA. // c	NM_004984 // Hs.151219 // brain; whole brain; lung; eye; uncharacterized tissue;	chr12	+	56230099	56264821	182	NM_004984 // KIF5A // kinesin family member 5A // 12q13.13 // 3798 /// AB210045	0.642277	0	0.00322267	0	10.0545	10.0545	2.43248	13.1516	10.1803	10.1803	3.6353	13.2337	0.642277	-0.125791	NM_004984 // RefSeq // Homo sapiens kinesin family member 5A (KIF5A), mRNA. // c	NM_004984
3	2389241	AB209286 // GenBank // Homo sapiens mRNA for hypothetical protein MGC12458 varia	AB209286 // Hs.134857 // brain; mixed; bladder; lung; mammary gland; uncharacter	chr1	+	243354596	243357079	12	AB209286 // EFCAB2 // EF-hand calcium binding domain 2 // 1q44 // 84288	0.282973	1.9122e-12	0.00327432	1.14176e-06	4.53708	4.53708	2.56327	6.76798	5.00983	5.00983	2.40449	7.20632	0.282973	-0.472749	AB209286 // GenBank // Homo sapiens mRNA for hypothetical protein MGC12458 varia	AB209286
2	2595758	GENSCAN00000023575 // ENSEMBL Prediction // cdna:Genscan chromosome:NCBI36:2:20	NM_001031693 // Hs.142245 // eye; brain; mammary gland; uncharacterized tissue;	chr2	-	204530420	204542532	12	NM_001031693 // HHLA3 // HERV-H LTR-associating 3 // 1p31.1 // 11147	0.628025	0.558353	0.00331316	0.00168835	2.84229	2.84229	1.53889	4.09436	2.66412	2.66412	1.30631	3.98054	0.628025	0.178174	GENSCAN00000023575 // ENSEMBL Prediction // cdna:Genscan chromosome:NCBI36:2:20	GENSCAN00000023575
5	2532272	NM_001632 // RefSeq // Homo sapiens alkaline phosphatase, placental (Regan isozy	NM_001632 // Hs.284255 // placenta; esophagus; colon; mixed; heart; uterus	chr2	+	232939060	232960480	69	NM_001632 // ALPP // alkaline phosphatase, placental (Regan isozyme) // 2q37 //	0.380629	2.24224e-25	0.00331817	8.32774e-07	4.73466	4.73466	1.70307	8.80392	5.02091	5.02091	2.66304	8.25371	0.380629	-0.286245	NM_001632 // RefSeq // Homo sapiens alkaline phosphatase, placental (Regan isozy	NM_001632
48	3927226	NM_000484 // RefSeq // Homo sapiens amyloid beta (A4) precursor protein (peptida	NM_000484 // Hs.651215 // brain; testis; colon; whole brain; embryonic tissue; m	chr21	-	26174742	26510310	452	NM_000484 // APP // amyloid beta (A4) precursor protein (peptidase nexin-II, Alz	0.302681	0	0.00331967	0	7.88957	7.88957	1.36581	13.1886	8.2305	8.2305	1.19832	13.4279	0.302681	-0.340932	NM_000484 // RefSeq // Homo sapiens amyloid beta (A4) precursor protein (peptida	NM_000484
2	3318342	NM_001004757 // RefSeq // Homo sapiens olfactory receptor, family 51, subfamily	NM_001004757 // Hs.528592 // brain	chr11	+	5399130	5400960	13	NM_001004757 // OR51Q1 // olfactory receptor, family 51, subfamily Q, member 1 /	0.0540359	1.50794e-05	0.00332167	0.019861	2.29655	2.29655	0.940765	4.00629	3.0447	3.0447	1.56135	4.6513	0.0540359	-0.748145	NM_001004757 // RefSeq // Homo sapiens olfactory receptor, family 51, subfamily	NM_001004757
26	3295331	NM_144589 // RefSeq // Homo sapiens catechol-O-methyltransferase domain containi	NM_144589 // Hs.355333 // brain; uncharacterized tissue; bone marrow; mammary gl	chr10	-	76660888	76665776	109	NM_144589 // COMTD1 // catechol-O-methyltransferase domain containing 1 // 10q22	0.103452	0	0.0033527	0	6.56728	6.56728	3.391	10.3374	7.05816	7.05816	3.14534	10.9137	0.103452	-0.490882	NM_144589 // RefSeq // Homo sapiens catechol-O-methyltransferase domain containi	NM_144589
43	3012540	XM_940258 // RefSeq // PREDICTED: Homo sapiens ankyrin repeat and IBR domain con	XM_940258 // Hs.83293 // brain; lung; whole brain; mammary gland; kidney; placen	chr7	+	91713224	91880402	293	XM_940258 // ANKIB1 // ankyrin repeat and IBR domain containing 1 // 7q21.2 // 5	0.496437	0	0.00337004	0	6.71464	6.71464	1.57093	10.429	6.94686	6.94686	2.40803	10.7583	0.496437	-0.232217	XM_940258 // RefSeq // PREDICTED: Homo sapiens ankyrin repeat and IBR domain con	XM_940258
7	2355365	XM_001134401 // RefSeq // PREDICTED: Homo sapiens region containing neuroblastom	NM_183372 // Hs.632440 // testis; mouth; brain; prostate; muscle; lung; uncharac	chr1	+	143231446	144081661	785	XM_001134401 // LOC730258 // region containing neuroblastoma breakpoint family,	0.431919	4.93053e-25	0.00343381	1.13882e-15	6.06164	6.06164	3.33539	7.96927	6.36342	6.36342	3.05788	8.21431	0.431919	-0.301781	XM_001134401 // RefSeq // PREDICTED: Homo sapiens region containing neuroblastom	XM_001134401
9	3329018	NM_018389 // RefSeq // Homo sapiens solute carrier family 35, member C1 (SLC35C1	NM_018389 // Hs.12211 // colon; placenta; uncharacterized tissue; connective tis	chr11	+	45782219	45791134	40	NM_018389 // SLC35C1 // solute carrier family 35, member C1 // 11p11.2 // 55343	0.117118	0	0.00346296	2.24911e-26	6.3759	6.3759	3.93646	9.67272	6.92521	6.92521	4.38922	10.1364	0.117118	-0.54931	NM_018389 // RefSeq // Homo sapiens solute carrier family 35, member C1 (SLC35C1	NM_018389
15	2332855	NM_015911 // RefSeq // Homo sapiens zinc finger protein 691 (ZNF691), mRNA. // c	NM_015911 // Hs.20879 // brain; mixed; lung; whole brain; kidney; uterus; muscle	chr1	+	43084693	43090731	64	NM_015911 // ZNF691 // zinc finger protein 691 // 1p34.2 // 51058 /// BC000157 /	0.230975	0	0.00348955	7.4015e-35	5.0975	5.0975	1.66921	7.67197	5.53402	5.53402	1.87064	8.36515	0.230975	-0.43652	NM_015911 // RefSeq // Homo sapiens zinc finger protein 691 (ZNF691), mRNA. // c	NM_015911
4	3109894	AK095151 // GenBank // Homo sapiens cDNA FLJ37832 fis, clone BRSSN2009630. // ch	BC042428 // Hs.413494 // brain; colon; thymus; thyroid; cranial nerve; blood; bo	chr8	+	103320331	103334737	28	BC042428 // COL23A1 // collagen, type XXIII, alpha 1 // 5q35.3 // 91522	0.24145	1.29227e-10	0.00350898	5.14219e-08	4.4242	4.4242	2.29725	5.85141	4.82081	4.82081	3.04198	6.22231	0.24145	-0.396605	AK095151 // GenBank // Homo sapiens cDNA FLJ37832 fis, clone BRSSN2009630. // ch	AK095151
73	3316707	XM_001126093 // RefSeq // PREDICTED: Homo sapiens similar to Mucin-5B precursor	XM_001126093 // Hs.523395 // colon; ascites; lung; stomach; pancreas; mammary gl	chr11	+	1196164	1245302	390	XM_001126093 // MUC5B // mucin 5B, oligomeric mucus/gel-forming // 11p15.5 // 72	0.179733	0	0.00351945	0	5.5351	5.5351	1.29677	9.45185	5.93606	5.93606	1.36841	9.68535	0.179733	-0.400955	XM_001126093 // RefSeq // PREDICTED: Homo sapiens similar to Mucin-5B precursor	XM_001126093
35	3434413	NM_014868 // RefSeq // Homo sapiens ring finger protein 10 (RNF10), mRNA. // chr	NM_014868 // Hs.442798 // brain; testis; whole brain; uterus; lung; thymus; kidn	chr12	+	119456489	119500226	202	NM_014868 // RNF10 // ring finger protein 10 // 12q24.31 // 9921	0.245937	0	0.00358172	0	6.95561	6.95561	1.91098	10.5464	7.36928	7.36928	2.07185	11.1032	0.245937	-0.413669	NM_014868 // RefSeq // Homo sapiens ring finger protein 10 (RNF10), mRNA. // chr	NM_014868
25	3843797	NM_016325 // RefSeq // Homo sapiens zinc finger protein 274 (ZNF274), transcript	NM_016325 // Hs.83761 // brain; spleen; mouth; testis; lung; prostate; mammary g	chr19	+	63358409	63416716	109	NM_016325 // ZNF274 // zinc finger protein 274 // 19qter // 10782 /// NM_016324	0.191767	0	0.00360979	0	5.54834	5.54834	2.09294	11.3772	5.94149	5.94149	2.41679	11.7873	0.191767	-0.393148	NM_016325 // RefSeq // Homo sapiens zinc finger protein 274 (ZNF274), transcript	NM_016325
26	3553103	AK125678 // GenBank // Homo sapiens cDNA FLJ43690 fis, clone TBAES2004055, highl	AK125678 // Hs.106005 // mixed; prostate; testis; mammary gland; uterus; stomach	chr14	+	101853477	101878792	115	AK125678 // C14orf131 // chromosome 14 open reading frame 131 // 14q32.31 // 557	0.169164	0	0.00362198	0	5.75052	5.75052	0.940765	9.0311	6.19489	6.19489	0.871403	9.59686	0.169164	-0.44437	AK125678 // GenBank // Homo sapiens cDNA FLJ43690 fis, clone TBAES2004055, highl	AK125678
7	3758757	NM_002722 // RefSeq // Homo sapiens pancreatic polypeptide (PPY), mRNA. // chr17	NM_002722 // Hs.558368 // pancreas; mixed; connective tissue /// NM_002722 // Hs	chr17	-	39360503	39379347	61	NM_002722 // PPY // pancreatic polypeptide // 17q21 // 5539 /// BC032225 // PPY	0.24821	0	0.00362463	9.30395e-16	5.23579	5.23579	3.0367	9.03139	5.60998	5.60998	2.77011	9.41689	0.24821	-0.374191	NM_002722 // RefSeq // Homo sapiens pancreatic polypeptide (PPY), mRNA. // chr17	NM_002722
16	2427538	NM_005549 // RefSeq // Homo sapiens potassium voltage-gated channel, shaker-rela	NM_005549 // Hs.248140 // --- /// NM_005549 // Hs.622910 // lung	chr1	-	110861362	110928719	93	NM_005549 // KCNA10 // potassium voltage-gated channel, shaker-related subfamily	0.412341	0	0.00362729	3.59225e-32	4.53526	4.53526	1.83157	7.21137	4.77481	4.77481	1.68202	7.47194	0.412341	-0.239551	NM_005549 // RefSeq // Homo sapiens potassium voltage-gated channel, shaker-rela	NM_005549
19	3204721	NM_213674 // RefSeq // Homo sapiens tropomyosin 2 (beta) (TPM2), transcript vari	NM_213674 // Hs.300772 // muscle; uterus; lung; prostate; heart; colon; pancreas	chr9	-	35672014	35681058	79	NM_213674 // TPM2 // tropomyosin 2 (beta) // 9p13.2-p13.1 // 7169 /// NM_003289	0.193673	0	0.00366061	0	5.6642	5.6642	2.05428	8.76466	6.18816	6.18816	1.11664	9.1383	0.193673	-0.523966	NM_213674 // RefSeq // Homo sapiens tropomyosin 2 (beta) (TPM2), transcript vari	NM_213674
11	2325274	NM_007260 // RefSeq // Homo sapiens lysophospholipase II (LYPLA2), mRNA. // chr1	NM_007260 // Hs.533479 // placenta; blood; skin; eye; mixed; tonsil; dorsal root	chr1	+	23977475	23987693	58	NM_007260 // LYPLA2 // lysophospholipase II // 1p36.12-p35.1 // 11313 /// NM_020	0.370889	0	0.00370001	6.45714e-37	6.87795	6.87795	1.85259	11.0519	7.22204	7.22204	1.29219	11.0358	0.370889	-0.344085	NM_007260 // RefSeq // Homo sapiens lysophospholipase II (LYPLA2), mRNA. // chr1	NM_007260
8	3298337	NM_015613 // RefSeq // Homo sapiens leucine rich repeat containing 21 (LRRC21),	NM_015613 // Hs.226000 // brain; muscle; eye	chr10	-	85978608	85991499	36	NM_015613 // LRRC21 // leucine rich repeat containing 21 // 10q23 // 26103	0.370549	6.89215e-41	0.00371533	7.97914e-17	4.15195	4.15195	1.51227	6.89994	4.47654	4.47654	1.63275	7.20616	0.370549	-0.324586	NM_015613 // RefSeq // Homo sapiens leucine rich repeat containing 21 (LRRC21),	NM_015613
5	3937923	XR_016999 // RefSeq // PREDICTED: Homo sapiens similar to Tubulin alpha-3 chain	XR_016999 // Hs.648251 // uncharacterized tissue	chr22	+	19749751	19754386	58	XR_016999 // LOC645348 // similar to Tubulin alpha-3 chain (Alpha-tubulin 3) //	0.0279285	2.88299e-13	0.00372719	1.40602e-05	3.63799	3.63799	1.5318	5.66811	4.34349	4.34349	1.92123	6.08892	0.0279285	-0.705498	XR_016999 // RefSeq // PREDICTED: Homo sapiens similar to Tubulin alpha-3 chain	XR_016999
3	3366792	ENST00000278194 // ENSEMBL Transcript // cdna:known chromosome:NCBI36:11:255665	XM_001133900 // Hs.646569 // heart; mixed	chr11	-	25566495	25649016	29	BC058160 // LOC554234 // ribosomal protein L36a pseudogene // 11p14.3 // 554234	0.0681966	0.0375076	0.00381148	0.0164791	2.03117	2.03117	1.3462	3.26742	2.65746	2.65746	0.996758	4.78996	0.0681966	-0.626292	ENST00000278194 // ENSEMBL Transcript // cdna:known chromosome:NCBI36:11:255665	ENST00000278194
6	4054287	NM_144705 // RefSeq // Homo sapiens tektin 4 (TEKT4), mRNA. // chr4_random // 10	NM_144705 // Hs.631517 // testis; lung; mixed; uterus; trachea; brain; eye /// X	chr4_random	-	442593	588876	284	NM_144705 // TEKT4 // tektin 4 // 2q11.1 // 150483 /// AK126241 // FLJ44253 // h	0.690901	2.23154e-22	0.00383716	1.76692e-05	5.19019	5.19019	2.12999	6.94088	5.29449	5.29449	2.53097	7.46348	0.690901	-0.104299	NM_144705 // RefSeq // Homo sapiens tektin 4 (TEKT4), mRNA. // chr4_random // 10	NM_144705
3	3636844	ENST00000339078 // ENSEMBL Transcript // Homo sapiens FLJ35171 protein (FLJ35171	XM_001130588 // Hs.630181 // testis /// XR_017329 // Hs.635230 // mixed; testis	chr15	-	82835715	82871355	112	XM_001132646 // LOC730145 // hypothetical protein LOC730145 // 15q25.2 // 730145	0.0734819	2.33931e-10	0.00389754	0.00410745	3.50513	3.50513	1.64064	6.37297	4.24877	4.24877	1.44818	6.77862	0.0734819	-0.743645	ENST00000339078 // ENSEMBL Transcript // Homo sapiens FLJ35171 protein (FLJ35171	ENST00000339078
11	2504328	NM_016815 // RefSeq // Homo sapiens glycophorin C (Gerbich blood group) (GYPC),	NM_016815 // Hs.59138 // mixed; skin; uncharacterized tissue; brain; kidney; lun	chr2	+	127130035	127174523	97	NM_016815 // GYPC // glycophorin C (Gerbich blood group) // 2q14-q21 // 2995 ///	0.129671	0	0.00391006	9.21386e-15	5.64189	5.64189	2.18338	9.77633	6.04968	6.04968	1.74937	10.0065	0.129671	-0.407793	NM_016815 // RefSeq // Homo sapiens glycophorin C (Gerbich blood group) (GYPC),	NM_016815
17	3817464	CR613172 // GenBank // full-length cDNA clone CS0DF009YE06 of Fetal brain of Hom	CR613172 // Hs.321689 // uncharacterized tissue; colon; mammary gland; muscle; m	chr19	+	4293764	4311120	87	CR613172 // FLJ14981 // hypothetical protein FLJ14981 // 19p13.3 // 84954 /// NM	0.183524	0	0.00392206	2.18918e-37	6.44583	6.44583	1.38469	10.0759	6.89242	6.89242	1.07225	10.382	0.183524	-0.446589	CR613172 // GenBank // full-length cDNA clone CS0DF009YE06 of Fetal brain of Hom	CR613172
4	3172348	AK127789 // GenBank // Homo sapiens cDNA FLJ45890 fis, clone OCBBF3022576. // na	AK127789 // Hs.380240 // brain; lung; uncharacterized tissue; whole brain; mixed	chr9	+	66293056	66324772	63	AK127789 // RP11-262H14.4 // hypothetical protein MGC21881 // 9q21.11 // 389741	0.695763	4.75134e-20	0.00402412	7.36941e-08	5.83818	5.83818	2.07769	8.33098	6.00157	6.00157	2.93257	8.66341	0.695763	-0.163391	AK127789 // GenBank // Homo sapiens cDNA FLJ45890 fis, clone OCBBF3022576. // na	AK127789
10	2739714	BC022534 // GenBank // Homo sapiens chromosome 4 open reading frame 32, mRNA (cD	BC022534 // Hs.23439 // lymph; pancreas; mammary gland; bone marrow; pituitary g	chr4	+	113285992	113329686	65	BC022534 // C4orf32 // chromosome 4 open reading frame 32 // 4q25 // 132720 ///	0.547109	0	0.00402721	1.69269e-18	5.85444	5.85444	1.04111	12.6801	6.03804	6.03804	0.687941	12.7895	0.547109	-0.183601	BC022534 // GenBank // Homo sapiens chromosome 4 open reading frame 32, mRNA (cD	BC022534
58	3521372	NM_198968 // RefSeq // Homo sapiens DAZ interacting protein 1 (DZIP1), transcrip	NM_198968 // Hs.157002 // brain; whole brain; testis; kidney; cochlea; lymph nod	chr13	-	95004464	95094948	319	NM_198968 // DZIP1 // DAZ interacting protein 1 // 13q32.1 // 22873 /// NM_01493	0.626892	0	0.00403711	0	6.04252	6.04252	1.63531	11.2067	6.19835	6.19835	1.38955	11.293	0.626892	-0.155833	NM_198968 // RefSeq // Homo sapiens DAZ interacting protein 1 (DZIP1), transcrip	NM_198968
15	3703112	NM_016095 // RefSeq // Homo sapiens GINS complex subunit 2 (Psf2 homolog) (GINS2	NM_016095 // Hs.433180 // uncharacterized tissue; mixed; eye; lymph node; brain;	chr16	-	84267325	84281160	60	NM_016095 // GINS2 // GINS complex subunit 2 (Psf2 homolog) // 16q24.1 // 51659	0.0727529	0	0.00406319	1.09581e-17	4.37522	4.37522	1.26606	7.73855	4.88551	4.88551	1.72261	8.46543	0.0727529	-0.51029	NM_016095 // RefSeq // Homo sapiens GINS complex subunit 2 (Psf2 homolog) (GINS2	NM_016095
41	3458857	NM_006576 // RefSeq // Homo sapiens advillin (AVIL), mRNA. // chr12 // 99 // 89	NM_006576 // Hs.584854 // brain; pharynx; uncharacterized tissue; testis; muscle	chr12	-	56477432	56499412	207	NM_006576 // AVIL // advillin // 12q14.1 // 10677 /// BC111730 // AVIL // advill	0.386782	0	0.00408331	0	4.53165	4.53165	1.53534	7.73495	4.76943	4.76943	1.5493	8.45406	0.386782	-0.237779	NM_006576 // RefSeq // Homo sapiens advillin (AVIL), mRNA. // chr12 // 99 // 89	NM_006576
9	2374022	AK125573 // GenBank // Homo sapiens cDNA FLJ43585 fis, clone SKNMC2007502. // ch	AK125573 // Hs.369324 // brain	chr1	+	197349967	197629048	83	AK125573 // FLJ43585 // hypothetical gene supported by AK125573 // 1q31.3-q32.1	0.189876	0	0.00408949	1.28463e-12	4.97177	4.97177	1.31635	8.66866	5.33657	5.33657	1.39326	8.96217	0.189876	-0.364799	AK125573 // GenBank // Homo sapiens cDNA FLJ43585 fis, clone SKNMC2007502. // ch	AK125573
6	3304797	BC043367 // GenBank // Homo sapiens family with sequence similarity 26, member A	BC043367 // Hs.364624 // placenta; cervix; lymph /// BC039499 // Hs.364624 // pl	chr10	-	105222552	105228987	24	BC043367 // FAM26A // family with sequence similarity 26, member A // 10q24.33 /	0.156475	4.23572e-22	0.00411926	1.0734e-10	4.62537	4.62537	1.5192	6.35489	5.09825	5.09825	2.17336	7.27885	0.156475	-0.472886	BC043367 // GenBank // Homo sapiens family with sequence similarity 26, member A	BC043367
30	2417016	NM_024763 // RefSeq // Homo sapiens WD repeat domain 78 (WDR78), transcript vari	NM_024763 // Hs.49421 // trachea; liver; thyroid; uncharacterized tissue; thymus	chr1	-	67051162	67163454	188	NM_024763 // WDR78 // WD repeat domain 78 // 1p31.3 // 79819 /// NM_207014 // WD	0.632157	0	0.00413738	1.23822e-36	4.45077	4.45077	0.852009	9.32065	4.56449	4.56449	1.17928	9.48909	0.632157	-0.113721	NM_024763 // RefSeq // Homo sapiens WD repeat domain 78 (WDR78), transcript vari	NM_024763
2	3361141	BX647669 // GenBank // Homo sapiens mRNA; cDNA DKFZp686C06101 (from clone DKFZp6	BX647669 // Hs.381123 // embryonic tissue; mixed; pancreas; brain; liver; prosta	chr11	-	6663692	6664352	16	BX647669 // RPL21 // ribosomal protein L21 // 13q12.2 // 6144	0.122794	4.73904e-06	0.00413897	0.0492459	4.44471	4.44471	3.25504	5.71103	4.92091	4.92091	3.28381	7.13761	0.122794	-0.476197	BX647669 // GenBank // Homo sapiens mRNA; cDNA DKFZp686C06101 (from clone DKFZp6	BX647669
26	2662206	ENST00000383834 // ENSEMBL Transcript // hypothetical gene supported by AK128398	BC052961 // Hs.598958 // lung; mixed; uncharacterized tissue; lymph node; pharyn	chr3	-	9291385	9416702	201	BC052961 // LOC440944 // hypothetical gene supported by AK128398 // 3p25.3 // 44	0.417542	0	0.00414168	0	5.44029	5.44029	1.39768	9.06758	5.70757	5.70757	2.2169	9.74155	0.417542	-0.267282	ENST00000383834 // ENSEMBL Transcript // hypothetical gene supported by AK128398	ENST00000383834
7	2324873	NM_172369 // RefSeq // Homo sapiens complement component 1, q subcomponent, C ch	NM_172369 // Hs.467753 // mixed; lung; placenta; colon; brain; mouth; kidney; ot	chr1	+	22842715	22847177	30	NM_172369 // C1QC // complement component 1, q subcomponent, C chain // 1p36.11	0.0795001	1.06696e-26	0.00416033	5.38679e-18	6.34742	6.34742	3.37501	8.69764	7.10977	7.10977	3.79047	9.56275	0.0795001	-0.76235	NM_172369 // RefSeq // Homo sapiens complement component 1, q subcomponent, C ch	NM_172369
20	2559449	NM_015470 // RefSeq // Homo sapiens RAB11 family interacting protein 5 (class I)	NM_015470 // Hs.24557 // brain; testis; kidney; placenta; prostate; eye; uterus;	chr2	-	73154032	73193653	129	NM_015470 // RAB11FIP5 // RAB11 family interacting protein 5 (class I) // 2p13-p	0.218251	0	0.00419127	0	6.65243	6.65243	3.58954	9.45764	7.09971	7.09971	3.20308	9.96883	0.218251	-0.447277	NM_015470 // RefSeq // Homo sapiens RAB11 family interacting protein 5 (class I)	NM_015470
13	3868728	NM_004917 // RefSeq // Homo sapiens kallikrein-related peptidase 4 (KLK4), mRNA.	NM_004917 // Hs.218366 // prostate; uncharacterized tissue; uterus; blood; brain	chr19	-	56081713	56105806	74	NM_004917 // KLK4 // kallikrein-related peptidase 4 // 19q13.41 // 9622 /// NR_0	0.0821094	0	0.00419246	1.68905e-14	4.44692	4.44692	1.47285	7.6288	4.88753	4.88753	1.86546	8.19062	0.0821094	-0.440616	NM_004917 // RefSeq // Homo sapiens kallikrein-related peptidase 4 (KLK4), mRNA.	NM_004917
72	3067302	NM_002291 // RefSeq // Homo sapiens laminin, beta 1 (LAMB1), mRNA. // chr7 // 10	NM_002291 // Hs.489646 // kidney; embryonic tissue; placenta; cochlea; lung; bra	chr7	-	107351426	107431959	399	NM_002291 // LAMB1 // laminin, beta 1 // 7q22 // 3912 /// BX648251 // LAMB1 // l	0.275427	0	0.00419624	0	5.53853	5.53853	1.40422	9.55584	5.88766	5.88766	1.29219	9.76268	0.275427	-0.349138	NM_002291 // RefSeq // Homo sapiens laminin, beta 1 (LAMB1), mRNA. // chr7 // 10	NM_002291
5	2885306	XR_016413 // RefSeq // PREDICTED: Homo sapiens similar to 40S ribosomal protein	XR_016413 // Hs.646914 // uncharacterized tissue /// XR_019476 // Hs.646914 // u	chr5	-	163884978	163961036	59	XR_016413 // LOC391845 // similar to 40S ribosomal protein S15 (RIG protein) //	0.290179	1.39247e-17	0.00420035	0.00181324	4.23068	4.23068	2.2312	7.29403	4.50431	4.50431	2.29104	7.4313	0.290179	-0.273632	XR_016413 // RefSeq // PREDICTED: Homo sapiens similar to 40S ribosomal protein	XR_016413
21	3630912	NM_012403 // RefSeq // Homo sapiens acidic (leucine-rich) nuclear phosphoprotein	NM_012403 // Hs.632596 // brain; whole brain; ovary; lymph; uncharacterized tiss	chr15	-	66857944	66900452	162	NM_012403 // ANP32C // acidic (leucine-rich) nuclear phosphoprotein 32 family, m	0.1741	0	0.00420276	0	5.58054	5.58054	1.15263	9.3587	6.05514	6.05514	1.16749	10.0842	0.1741	-0.474598	NM_012403 // RefSeq // Homo sapiens acidic (leucine-rich) nuclear phosphoprotein	NM_012403
79	3352503	NM_015313 // RefSeq // Homo sapiens Rho guanine nucleotide exchange factor (GEF)	NM_015313 // Hs.24598 // colon; brain; mixed; placenta; uterus; eye; liver; whol	chr11	+	119711882	119896306	423	NM_015313 // ARHGEF12 // Rho guanine nucleotide exchange factor (GEF) 12 // 11q2	0.34568	0	0.00425134	0	7.24235	7.24235	1.17307	11.7513	7.5678	7.5678	1.16631	11.8956	0.34568	-0.32545	NM_015313 // RefSeq // Homo sapiens Rho guanine nucleotide exchange factor (GEF)	NM_015313
32	3749086	NM_007202 // RefSeq // Homo sapiens A kinase (PRKA) anchor protein 10 (AKAP10),	NM_007202 // Hs.645379 // whole brain; testis; embryonic tissue; mammary gland;	chr17	-	19748227	19821731	134	NM_007202 // AKAP10 // A kinase (PRKA) anchor protein 10 // 17p11.1 // 11216 ///	0.458989	0	0.0042677	0	5.99646	5.99646	1.15944	10.1569	6.24908	6.24908	1.07543	10.4434	0.458989	-0.252619	NM_007202 // RefSeq // Homo sapiens A kinase (PRKA) anchor protein 10 (AKAP10),	NM_007202
23	3674848	NM_022450 // RefSeq // Homo sapiens rhomboid 5 homolog 1 (Drosophila) (RHBDF1),	NM_022450 // Hs.57988 // brain; prostate; placenta; embryonic tissue; colon; oth	chr16	-	48074	62605	143	NM_022450 // RHBDF1 // rhomboid 5 homolog 1 (Drosophila) // 16p13.3 // 64285 ///	0.216749	0	0.00427822	0	5.89103	5.89103	2.00322	10.2222	6.29923	6.29923	3.24441	10.5266	0.216749	-0.408204	NM_022450 // RefSeq // Homo sapiens rhomboid 5 homolog 1 (Drosophila) (RHBDF1),	NM_022450
18	2905169	NM_078467 // RefSeq // Homo sapiens cyclin-dependent kinase inhibitor 1A (p21, C	NM_078467 // Hs.370771 // lung; skin; brain; uncharacterized tissue; eye; connec	chr6	+	36752283	36763796	97	NM_078467 // CDKN1A // cyclin-dependent kinase inhibitor 1A (p21, Cip1) // 6p21.	0.157999	0	0.00428648	3.11279e-33	5.54304	5.54304	1.53151	9.09855	6.03037	6.03037	2.26748	9.32489	0.157999	-0.487326	NM_078467 // RefSeq // Homo sapiens cyclin-dependent kinase inhibitor 1A (p21, C	NM_078467
11	2876361	NM_002653 // RefSeq // Homo sapiens paired-like homeodomain transcription factor	NM_002653 // Hs.84136 // lung; colon; prostate; uncharacterized tissue; eye; bra	chr5	-	134391326	134398223	47	NM_002653 // PITX1 // paired-like homeodomain transcription factor 1 // 5q31 //	0.17091	0	0.00428834	3.32271e-21	5.20564	5.20564	1.60592	10.9902	5.58648	5.58648	1.67286	11.0758	0.17091	-0.380843	NM_002653 // RefSeq // Homo sapiens paired-like homeodomain transcription factor	NM_002653
9	2949330	NM_001288 // RefSeq // Homo sapiens chloride intracellular channel 1 (CLIC1), mR	NM_001288 // Hs.414565 // pancreas; lung; skin; colon; mixed; embryonic tissue;	chr6	-	31806365	31815144	58	NM_001288 // CLIC1 // chloride intracellular channel 1 // 6p22.1-p21.2 // 1192 /	0.205003	0	0.00430219	1.48752e-18	4.79815	4.79815	1.98277	8.61993	5.1919	5.1919	2.25861	9.28093	0.205003	-0.393751	NM_001288 // RefSeq // Homo sapiens chloride intracellular channel 1 (CLIC1), mR	NM_001288
11	3833926	NM_000767 // RefSeq // Homo sapiens cytochrome P450, family 2, subfamily B, poly	NM_000767 // Hs.1360 // mixed; liver; uncharacterized tissue; kidney; mammary gl	chr19	+	46189051	46216120	71	NM_000767 // CYP2B6 // cytochrome P450, family 2, subfamily B, polypeptide 6 //	0.195165	0	0.00430339	5.46016e-15	4.16593	4.16593	1.57409	7.09862	4.53753	4.53753	1.36965	7.77937	0.195165	-0.371593	NM_000767 // RefSeq // Homo sapiens cytochrome P450, family 2, subfamily B, poly	NM_000767
32	3656362	NM_022452 // RefSeq // Homo sapiens fibrosin 1 (FBS1), mRNA. // chr16 // 100 //	NM_022452 // Hs.247186 // testis; uncharacterized tissue; embryonic tissue; kidn	chr16	+	30577810	30590035	187	NM_022452 // FBS1 // fibrosin 1 // 16p11.2 // 64319 /// BC014212 // FBS1 // fibr	0.201781	0	0.00433031	0	6.11727	6.11727	1.50501	9.22551	6.50566	6.50566	1.2292	9.89608	0.201781	-0.388387	NM_022452 // RefSeq // Homo sapiens fibrosin 1 (FBS1), mRNA. // chr16 // 100 //	NM_022452
12	3867443	NM_016246 // RefSeq // Homo sapiens dehydrogenase/reductase (SDR family) member	NM_016246 // Hs.18788 // mixed; lung; kidney; brain; eye; stomach; uterus; pancr	chr19	-	54008089	54031727	54	NM_016246 // HSD17B14 // hydroxysteroid (17-beta) dehydrogenase 14 // 19q13.33 /	0.120035	0	0.0043767	0	6.7639	6.7639	3.69974	9.76756	7.52206	7.52206	4.21885	10.7139	0.120035	-0.758155	NM_016246 // RefSeq // Homo sapiens dehydrogenase/reductase (SDR family) member	NM_016246
48	2648677	NM_007289 // RefSeq // Homo sapiens membrane metallo-endopeptidase (neutral endo	NM_007289 // Hs.307734 // kidney; lymph node; mixed; prostate; placenta; skin; m	chr3	+	156280150	156510610	318	NM_007289 // MME // membrane metallo-endopeptidase (neutral endopeptidase, enkep	0.591617	0	0.00437973	0	3.84948	3.84948	1.17312	7.62126	3.98123	3.98123	1.13827	8.21062	0.591617	-0.131748	NM_007289 // RefSeq // Homo sapiens membrane metallo-endopeptidase (neutral endo	NM_007289
34	3964154	NM_022766 // RefSeq // Homo sapiens ceramide kinase (CERK), transcript variant 1	NM_022766 // Hs.200668 // brain; uncharacterized tissue; colon; pancreas; mouth;	chr22	-	45454343	45537349	156	NM_022766 // CERK // ceramide kinase // 22q13.31 // 64781 /// NM_182661 // CERK	0.16869	0	0.00439664	0	6.14483	6.14483	2.21852	9.86409	6.55487	6.55487	1.69832	10.1518	0.16869	-0.410036	NM_022766 // RefSeq // Homo sapiens ceramide kinase (CERK), transcript variant 1	NM_022766
26	2404209	NM_014654 // RefSeq // Homo sapiens syndecan 3 (N-syndecan) (SDC3), mRNA. // chr	NM_014654 // Hs.158287 // brain; skin; whole brain; eye; pancreas; thyroid; pros	chr1	-	31114901	31154211	149	NM_014654 // SDC3 // syndecan 3 (N-syndecan) // 1pter-p22.3 // 9672 /// AB007937	0.258518	0	0.00441916	0	6.97568	6.97568	2.11871	10.3118	7.40051	7.40051	2.36353	11.0093	0.258518	-0.424827	NM_014654 // RefSeq // Homo sapiens syndecan 3 (N-syndecan) (SDC3), mRNA. // chr	NM_014654
12	3557811	NM_002818 // RefSeq // Homo sapiens proteasome (prosome, macropain) activator su	NM_002818 // Hs.434081 // mixed; lung; uterus; brain; lymph; bone marrow; placen	chr14	-	23682420	23686372	93	NM_002818 // PSME2 // proteasome (prosome, macropain) activator subunit 2 (PA28	0.31388	1.54785e-40	0.00449066	2.02224e-21	4.7525	4.7525	2.75842	7.37448	5.09073	5.09073	2.10064	7.71837	0.31388	-0.338238	NM_002818 // RefSeq // Homo sapiens proteasome (prosome, macropain) activator su	NM_002818
25	3081707	NM_005515 // RefSeq // Homo sapiens homeobox HB9 (HLXB9), mRNA. // chr7 // 100 /	NM_005515 // Hs.37035 // pancreas; colon; uncharacterized tissue; embryonic tiss	chr7	-	156470636	156531227	138	NM_005515 // HLXB9 // homeobox HB9 // 7q36 // 3110	0.171965	0	0.00450481	0	5.55433	5.55433	2.16486	8.51448	5.93674	5.93674	2.52897	8.65638	0.171965	-0.382405	NM_005515 // RefSeq // Homo sapiens homeobox HB9 (HLXB9), mRNA. // chr7 // 100 /	NM_005515
3	3129863	BC003524 // GenBank // Homo sapiens, clone IMAGE:3607242, mRNA, partial cds. //	BC003524 // Hs.566911 // uterus; brain; uncharacterized tissue; skin; lymph node	chr8	-	29634703	29661534	34	BC003524 // C8orf75 // chromosome 8 open reading frame 75 // 8p12 // 619351	0.178158	1.34963e-12	0.00453281	0.000281507	3.12925	3.12925	1.5082	5.14628	3.57624	3.57624	1.17511	6.07615	0.178158	-0.446989	BC003524 // GenBank // Homo sapiens, clone IMAGE:3607242, mRNA, partial cds. //	BC003524
52	3907561	NM_022095 // RefSeq // Homo sapiens zinc finger protein 335 (ZNF335), mRNA. // c	NM_022095 // Hs.174193 // uncharacterized tissue; brain; mixed; spleen; uterus;	chr20	-	44010715	44062487	234	NM_022095 // ZNF335 // zinc finger protein 335 // 20q11.21-q13.12 // 63925 /// A	0.125313	0	0.00453581	0	5.85985	5.85985	1.64762	9.03874	6.3568	6.3568	2.43951	9.63444	0.125313	-0.49695	NM_022095 // RefSeq // Homo sapiens zinc finger protein 335 (ZNF335), mRNA. // c	NM_022095
20	3405396	NM_001310 // RefSeq // Homo sapiens cAMP responsive element binding protein-like	NM_001310 // Hs.591156 // brain; testis; lung; stomach; vascular; thymus; thyroi	chr12	+	12656048	12759058	108	NM_001310 // CREBL2 // cAMP responsive element binding protein-like 2 // 12p13 /	0.294076	0	0.00454349	1.03042e-32	5.51855	5.51855	1.97674	9.83779	5.82474	5.82474	1.93697	10.7157	0.294076	-0.306187	NM_001310 // RefSeq // Homo sapiens cAMP responsive element binding protein-like	NM_001310
12	2856995	NM_007036 // RefSeq // Homo sapiens endothelial cell-specific molecule 1 (ESM1),	NM_007036 // Hs.129944 // vascular; brain; connective tissue; bladder; pancreas;	chr5	-	54271480	54317399	61	NM_007036 // ESM1 // endothelial cell-specific molecule 1 // 5q11.2 // 11082 ///	0.154017	0	0.00454817	4.37796e-21	3.8793	3.8793	1.69629	6.91453	4.30076	4.30076	1.19236	6.82881	0.154017	-0.42146	NM_007036 // RefSeq // Homo sapiens endothelial cell-specific molecule 1 (ESM1),	NM_007036
15	3663055	NM_024598 // RefSeq // Homo sapiens chromosome 16 open reading frame 57 (C16orf5	NM_024598 // Hs.588873 // brain; uncharacterized tissue; lung; kidney; placenta;	chr16	+	56591019	56613015	72	NM_024598 // C16orf57 // chromosome 16 open reading frame 57 // 16q13 // 79650 /	0.131916	0	0.00456091	8.64449e-35	5.48414	5.48414	2.00903	10.5254	6.03947	6.03947	2.78129	10.8382	0.131916	-0.55533	NM_024598 // RefSeq // Homo sapiens chromosome 16 open reading frame 57 (C16orf5	NM_024598
78	3156307	NM_005607 // RefSeq // Homo sapiens PTK2 protein tyrosine kinase 2 (PTK2), trans	NM_005607 // Hs.395482 // brain; testis; colon; lung; mixed; placenta; mammary g	chr8	-	141737201	142080543	613	NM_005607 // PTK2 // PTK2 protein tyrosine kinase 2 // 8q24-qter // 5747 /// NM_	0.361877	0	0.00461889	0	6.76104	6.76104	1.08577	11.9443	7.10499	7.10499	0.871403	12.2707	0.361877	-0.343946	NM_005607 // RefSeq // Homo sapiens PTK2 protein tyrosine kinase 2 (PTK2), trans	NM_005607
51	2400718	NM_032236 // RefSeq // Homo sapiens ubiquitin specific peptidase 48 (USP48), tra	NM_032236 // Hs.467524 // brain; testis; placenta; pharynx; uterus; adrenal glan	chr1	-	21874038	21982221	268	NM_032236 // USP48 // ubiquitin specific peptidase 48 // 1p36.12 // 84196 /// NM	0.477163	0	0.00462168	0	6.40369	6.40369	1.83147	10.9991	6.65379	6.65379	1.77152	11.0655	0.477163	-0.250103	NM_032236 // RefSeq // Homo sapiens ubiquitin specific peptidase 48 (USP48), tra	NM_032236
32	2427791	NM_024901 // RefSeq // Homo sapiens DENN/MADD domain containing 2D (DENND2D), mR	NM_024901 // Hs.557850 // uncharacterized tissue; brain; bone marrow; adrenal gl	chr1	-	111527887	111548684	158	NM_024901 // DENND2D // DENN/MADD domain containing 2D // 1p13.3 // 79961 /// AK	0.146784	0	0.00462261	0	4.78177	4.78177	1.09103	8.71402	5.18745	5.18745	1.26908	8.83841	0.146784	-0.405684	NM_024901 // RefSeq // Homo sapiens DENN/MADD domain containing 2D (DENND2D), mR	NM_024901
29	3559497	NM_014574 // RefSeq // Homo sapiens striatin, calmodulin binding protein 3 (STRN	NM_014574 // Hs.401843 // uncharacterized tissue; mixed; embryonic tissue; whole	chr14	-	30432655	30565347	245	NM_014574 // STRN3 // striatin, calmodulin binding protein 3 // 14q13-q21 // 299	0.524346	0	0.00463706	0	6.04281	6.04281	1.26695	10.038	6.27669	6.27669	1.2292	10.466	0.524346	-0.233879	NM_014574 // RefSeq // Homo sapiens striatin, calmodulin binding protein 3 (STRN	NM_014574
28	3955627	NM_182492 // RefSeq // Homo sapiens low density lipoprotein receptor-related pro	NM_182492 // Hs.648254 // thyroid; brain; blood; uncharacterized tissue; colon;	chr22	-	24076551	24131344	146	NM_182492 // LRP5L // low density lipoprotein receptor-related protein 5-like //	0.230268	0	0.00466538	0	5.19469	5.19469	1.73726	7.87416	5.5585	5.5585	1.82502	8.56834	0.230268	-0.363815	NM_182492 // RefSeq // Homo sapiens low density lipoprotein receptor-related pro	NM_182492
27	2686727	NM_014415 // RefSeq // Homo sapiens zinc finger and BTB domain containing 11 (ZB	NM_014415 // Hs.545311 // brain; testis; lymph node; embryonic tissue; blood; un	chr3	-	102780272	102878819	143	NM_014415 // ZBTB11 // zinc finger and BTB domain containing 11 // 3q12.3 // 271	0.403424	0	0.00467799	0	5.74773	5.74773	1.49138	9.42474	6.01069	6.01069	1.8568	10.0713	0.403424	-0.262958	NM_014415 // RefSeq // Homo sapiens zinc finger and BTB domain containing 11 (ZB	NM_014415
38	3784727	NM_018255 // RefSeq // Homo sapiens signal transducer and activator of transcrip	NM_018255 // Hs.8739 // brain; prostate; lymph node; testis; connective tissue;	chr18	+	31963870	32020514	207	NM_018255 // STATIP1 // signal transducer and activator of transcription 3 inter	0.173398	0	0.00467979	0	6.65605	6.65605	2.076	10.5451	7.17488	7.17488	2.43361	10.7121	0.173398	-0.51883	NM_018255 // RefSeq // Homo sapiens signal transducer and activator of transcrip	NM_018255
7	3897840	XM_001127823 // RefSeq // PREDICTED: Homo sapiens hypothetical protein LOC728573	XM_001127823 // Hs.127089 // brain; mixed	chr20	-	11614966	11710033	38	XM_001127823 // LOC728573 // hypothetical protein LOC728573 // 20p12.2 // 728573	0.0670971	1.6449e-29	0.00472105	3.09838e-08	3.05796	3.05796	1.41829	6.42659	3.54203	3.54203	1.81868	6.80115	0.0670971	-0.48407	XM_001127823 // RefSeq // PREDICTED: Homo sapiens hypothetical protein LOC728573	XM_001127823
14	3892918	NM_018270 // RefSeq // Homo sapiens chromosome 20 open reading frame 20 (C20orf2	NM_018270 // Hs.590870 // brain; colon; cervix; testis; heart; blood; lung; unch	chr20	+	60898107	60903524	75	NM_018270 // C20orf20 // chromosome 20 open reading frame 20 // 20q13.33 // 5525	0.371998	0	0.00473161	7.20904e-30	5.42695	5.42695	2.24731	8.90369	5.7642	5.7642	1.47006	9.18328	0.371998	-0.337256	NM_018270 // RefSeq // Homo sapiens chromosome 20 open reading frame 20 (C20orf2	NM_018270
8	3519624	NM_052910 // RefSeq // Homo sapiens SLIT and NTRK-like family, member 1 (SLITRK1	NM_052910 // Hs.415478 // brain; whole brain; uncharacterized tissue; whole body	chr13	-	83349052	83354529	32	NM_052910 // SLITRK1 // SLIT and NTRK-like family, member 1 // 13q31.1 // 114798	0.284662	0	0.00474315	5.72736e-30	8.33574	8.33574	5.25248	10.9525	8.73774	8.73774	6.09978	11.4338	0.284662	-0.402005	NM_052910 // RefSeq // Homo sapiens SLIT and NTRK-like family, member 1 (SLITRK1	NM_052910
37	3655826	NM_004783 // RefSeq // Homo sapiens TAO kinase 2 (TAOK2), transcript variant 1,	NM_004783 // Hs.291623 // brain; colon; uncharacterized tissue; prostate; thyroi	chr16	+	29892733	29911145	166	NM_004783 // TAOK2 // TAO kinase 2 // 16p11.2 // 9344 /// NM_016151 // TAOK2 //	0.209169	0	0.00477851	0	7.15868	7.15868	1.23989	9.80089	7.62128	7.62128	1.17974	10.196	0.209169	-0.462597	NM_004783 // RefSeq // Homo sapiens TAO kinase 2 (TAOK2), transcript variant 1,	NM_004783
39	3375192	NM_152718 // RefSeq // Homo sapiens von Willebrand factor C and EGF domains (VWC	NM_152718 // Hs.60640 // uncharacterized tissue; placenta; liver; eye; lung; kid	chr11	-	60776215	60819139	196	NM_152718 // VWCE // von Willebrand factor C and EGF domains // 11q12.2 // 22000	0.126893	0	0.00478217	0	5.28181	5.28181	1.01294	8.567	5.79008	5.79008	1.28123	8.92003	0.126893	-0.508268	NM_152718 // RefSeq // Homo sapiens von Willebrand factor C and EGF domains (VWC	NM_152718
31	2977621	NM_006718 // RefSeq // Homo sapiens pleiomorphic adenoma gene-like 1 (PLAGL1), t	NM_006718 // Hs.444975 // placenta; brain; mammary gland; bladder; skin; prostat	chr6	-	144303142	144427370	248	NM_006718 // PLAGL1 // pleiomorphic adenoma gene-like 1 // 6q24-q25 // 5325 ///	0.379669	0	0.00479764	0	5.24117	5.24117	1.22196	8.54985	5.54889	5.54889	1.2292	9.18271	0.379669	-0.307718	NM_006718 // RefSeq // Homo sapiens pleiomorphic adenoma gene-like 1 (PLAGL1), t	NM_006718
21	3819474	NM_139314 // RefSeq // Homo sapiens angiopoietin-like 4 (ANGPTL4), transcript va	NM_139314 // Hs.9613 // placenta; brain; pancreas; skin; mixed; testis; connecti	chr19	+	8317399	8345246	91	NM_139314 // ANGPTL4 // angiopoietin-like 4 // 19p13.3 // 51129 /// NM_001039667	0.757562	0	0.00480502	2.30458e-40	5.5236	5.5236	1.17141	9.22046	5.63409	5.63409	0.871403	8.84543	0.757562	-0.110492	NM_139314 // RefSeq // Homo sapiens angiopoietin-like 4 (ANGPTL4), transcript va	NM_139314
9	3157029	NM_015193 // RefSeq // Homo sapiens activity-regulated cytoskeleton-associated p	NM_015193 // Hs.40888 // brain; lung; uncharacterized tissue; liver; mixed; pros	chr8	-	143689412	143691644	41	NM_015193 // ARC // activity-regulated cytoskeleton-associated protein // 8q24.3	0.0527392	8.65488e-18	0.00483157	4.22838e-26	6.77499	6.77499	4.49425	8.37644	7.44924	7.44924	5.94228	9.16846	0.0527392	-0.674257	NM_015193 // RefSeq // Homo sapiens activity-regulated cytoskeleton-associated p	NM_015193
32	3432394	NM_016816 // RefSeq // Homo sapiens 2',5'-oligoadenylate synthetase 1, 40/46kDa	NM_016816 // Hs.524760 // colon; brain; uterus; mixed; mammary gland; lung; unch	chr12	+	111714049	111821058	163	NM_016816 // OAS1 // 2',5'-oligoadenylate synthetase 1, 40/46kDa // 12q24.1 // 4	0.205893	0	0.00484644	0	8.2047	8.2047	4.49093	11.5035	8.6479	8.6479	4.60728	12.4381	0.205893	-0.4432	NM_016816 // RefSeq // Homo sapiens 2',5'-oligoadenylate synthetase 1, 40/46kDa	NM_016816
11	3863060	NM_020158 // RefSeq // Homo sapiens exosome component 5 (EXOSC5), mRNA. // chr19	NM_020158 // Hs.283741 // lung; uncharacterized tissue; mixed; colon; eye; place	chr19	-	46584127	46595224	56	NM_020158 // EXOSC5 // exosome component 5 // 19q13.1 // 56915 /// CR600780 // E	0.137396	0	0.00485312	2.81111e-33	5.9767	5.9767	2.87167	9.1572	6.61034	6.61034	2.19833	9.73793	0.137396	-0.633637	NM_020158 // RefSeq // Homo sapiens exosome component 5 (EXOSC5), mRNA. // chr19	NM_020158
3	2381794	XM_943873 // RefSeq // PREDICTED: Homo sapiens melanoma inhibitory activity fami	XM_943873 // Hs.118474 // mixed; brain; lung; testis; cochlea; liver; placenta;	chr1	+	220858076	220906409	249	XM_943873 // MIA3 // melanoma inhibitory activity family, member 3 // 1q41 // 37	0.149753	5.20521e-07	0.00485372	2.12952e-05	4.5004	4.5004	2.38366	6.2808	5.02594	5.02594	3.22896	6.37214	0.149753	-0.525539	XM_943873 // RefSeq // PREDICTED: Homo sapiens melanoma inhibitory activity fami	XM_943873
31	3009229	NM_000941 // RefSeq // Homo sapiens P450 (cytochrome) oxidoreductase (POR), mRNA	NM_000941 // Hs.354056 // brain; testis; mouth; placenta; uncharacterized tissue	chr7	+	75382327	75454076	135	NM_000941 // POR // P450 (cytochrome) oxidoreductase // 7q11.2 // 5447	0.112389	0	0.00485563	0	6.22162	6.22162	0.747535	9.42812	6.7984	6.7984	1.47474	9.62962	0.112389	-0.576779	NM_000941 // RefSeq // Homo sapiens P450 (cytochrome) oxidoreductase (POR), mRNA	NM_000941
22	3336324	NM_001104 // RefSeq // Homo sapiens actinin, alpha 3 (ACTN3), mRNA. // chr11 //	NM_001104 // Hs.445037 // heart; uncharacterized tissue; muscle; embryonic tissu	chr11	+	66070331	66087370	99	NM_001104 // ACTN3 // actinin, alpha 3 // 11q13-q14 // 89	0.227191	0	0.00487164	0	4.94958	4.94958	1.85667	7.50148	5.30903	5.30903	2.72429	8.23993	0.227191	-0.359446	NM_001104 // RefSeq // Homo sapiens actinin, alpha 3 (ACTN3), mRNA. // chr11 //	NM_001104
57	3849298	NM_024690 // RefSeq // Homo sapiens mucin 16, cell surface associated (MUC16), m	NM_024690 // Hs.432676 // uterus; mammary gland; lung; trachea; placenta; eye; m	chr19	-	8820520	8915348	386	NM_024690 // MUC16 // mucin 16, cell surface associated // 19q13.2 // 94025 ///	0.211394	0	0.00487453	0	4.32384	4.32384	1.10519	8.19222	4.68401	4.68401	0.871403	8.91972	0.211394	-0.36017	NM_024690 // RefSeq // Homo sapiens mucin 16, cell surface associated (MUC16), m	NM_024690
39	3219621	NM_003798 // RefSeq // Homo sapiens catenin (cadherin-associated protein), alpha	NM_003798 // Hs.58488 // testis; brain; placenta; umbilical cord; adrenal gland;	chr9	-	110744011	110815625	218	NM_003798 // CTNNAL1 // catenin (cadherin-associated protein), alpha-like 1 // 9	0.317137	0	0.00487793	0	4.66601	4.66601	1.24983	8.87906	4.9705	4.9705	0.98348	9.40401	0.317137	-0.304491	NM_003798 // RefSeq // Homo sapiens catenin (cadherin-associated protein), alpha	NM_003798
22	3803020	NM_004948 // RefSeq // Homo sapiens desmocollin 1 (DSC1), transcript variant Dsc	NM_004948 // Hs.567260 // small intestine; brain; heart; whole body; colon; skin	chr18	-	26963207	27128615	116	NM_004948 // DSC1 // desmocollin 1 // 18q12.2|18q12.1 // 1823 /// NM_024421 // D	0.159121	0	0.00488349	3.26503e-42	3.61936	3.61936	1.48152	5.70402	4.03155	4.03155	1.47741	6.16995	0.159121	-0.412188	NM_004948 // RefSeq // Homo sapiens desmocollin 1 (DSC1), transcript variant Dsc	NM_004948
10	2829589	NM_032151 // RefSeq // Homo sapiens pterin-4 alpha-carbinolamine dehydratase/dim	NM_032151 // Hs.527213 // prostate; lung; uncharacterized tissue; muscle; stomac	chr5	+	134268729	134335107	126	NM_032151 // PCBD2 // pterin-4 alpha-carbinolamine dehydratase/dimerization cofa	0.192309	0	0.0048867	7.21837e-20	5.54732	5.54732	2.62721	9.81797	5.96582	5.96582	3.30258	10.0347	0.192309	-0.418494	NM_032151 // RefSeq // Homo sapiens pterin-4 alpha-carbinolamine dehydratase/dim	NM_032151
7	2930907	BC016788 // GenBank // Homo sapiens low density lipoprotein receptor-related pro	BC016788 // Hs.408355 // lung; mixed; whole brain; stomach; testis; pancreas; wh	chr6	+	150205100	150282337	91	BC016788 // LRP11 // low density lipoprotein receptor-related protein 11 // 6q25	0.300005	1.90097e-31	0.00489055	2.98758e-13	5.53545	5.53545	2.88837	8.08607	5.85203	5.85203	3.85551	7.96356	0.300005	-0.316585	BC016788 // GenBank // Homo sapiens low density lipoprotein receptor-related pro	BC016788
19	2593838	NM_033030 // RefSeq // Homo sapiens bol, boule-like (Drosophila) (BOLL), transcr	NM_033030 // Hs.169797 // testis; mixed; brain; connective tissue; uterus; bladd	chr2	-	198299856	198359533	96	NM_033030 // BOLL // bol, boule-like (Drosophila) // 2q33 // 66037 /// NM_197970	0.28851	0	0.00489592	7.27428e-25	3.55294	3.55294	1.00784	9.85993	3.81209	3.81209	0.947238	10.2291	0.28851	-0.259143	NM_033030 // RefSeq // Homo sapiens bol, boule-like (Drosophila) (BOLL), transcr	NM_033030
35	2965206	NM_004440 // RefSeq // Homo sapiens EPH receptor A7 (EPHA7), mRNA. // chr6 // 10	NM_004440 // Hs.73962 // brain; whole brain; embryonic tissue; pancreas; kidney;	chr6	-	93989210	94186101	203	NM_004440 // EPHA7 // EPH receptor A7 // 6q16.1 // 2045 /// BC027940 // EPHA7 //	0.401325	0	0.00491806	0	5.85506	5.85506	1.32463	9.82468	6.11826	6.11826	1.23597	9.58353	0.401325	-0.263205	NM_004440 // RefSeq // Homo sapiens EPH receptor A7 (EPHA7), mRNA. // chr6 // 10	NM_004440
17	3067714	XR_017326 // RefSeq // PREDICTED: Homo sapiens similar to Mitotic checkpoint pro	XR_017326 // Hs.647515 // ---	chr7	-	108381497	108626722	114	XR_017326 // LOC646614 // similar to Mitotic checkpoint protein BUB3 (WD repeat	0.200885	0	0.00495805	1.09134e-18	3.85057	3.85057	1.31417	7.53217	4.17544	4.17544	1.54884	7.85221	0.200885	-0.324876	XR_017326 // RefSeq // PREDICTED: Homo sapiens similar to Mitotic checkpoint pro	XR_017326
13	3824874	NM_006332 // RefSeq // Homo sapiens interferon, gamma-inducible protein 30 (IFI3	NM_006332 // Hs.14623 // lung; uncharacterized tissue; placenta; pancreas; mixed	chr19	+	18145526	18150138	58	NM_006332 // IFI30 // interferon, gamma-inducible protein 30 // 19p13.1 // 10437	0.114218	9.3887e-44	0.00498971	4.9459e-26	5.02748	5.02748	2.24626	7.61371	5.62406	5.62406	2.64883	8.33283	0.114218	-0.596581	NM_006332 // RefSeq // Homo sapiens interferon, gamma-inducible protein 30 (IFI3	NM_006332
39	3435078	NM_144668 // RefSeq // Homo sapiens WD repeat domain 66 (WDR66), mRNA. // chr12	NM_144668 // Hs.620697 // trachea; thymus; testis; pituitary gland; lung; larynx	chr12	+	120840863	120926195	228	NM_144668 // WDR66 // WD repeat domain 66 // 12q24.31 // 144406 /// NM_002813 //	0.336829	0	0.00499371	0	4.84855	4.84855	1.2865	8.64449	5.12812	5.12812	1.57748	9.30774	0.336829	-0.279562	NM_144668 // RefSeq // Homo sapiens WD repeat domain 66 (WDR66), mRNA. // chr12	NM_144668
20	3941093	AK098833 // GenBank // Homo sapiens cDNA FLJ25967 fis, clone CBR01929. // chr22	AK098833 // Hs.517502 // brain; whole brain; embryonic tissue; eye; lung; unchar	chr22	+	25383264	25402438	92	AK098833 // FLJ25967 // hypothetical gene supported by AK098833 // 22q12.1 // 44	0.3265	0	0.00505421	1.4013e-45	7.48398	7.48398	2.3847	10.7712	7.79656	7.79656	1.93978	11.4535	0.3265	-0.312584	AK098833 // GenBank // Homo sapiens cDNA FLJ25967 fis, clone CBR01929. // chr22	AK098833
55	2823551	NM_002372 // RefSeq // Homo sapiens mannosidase, alpha, class 2A, member 1 (MAN2	NM_002372 // Hs.432822 // brain; mixed; uncharacterized tissue; kidney; liver; e	chr5	+	109052886	109288242	343	NM_002372 // MAN2A1 // mannosidase, alpha, class 2A, member 1 // 5q21-q22 // 412	0.504509	0	0.00508366	0	6.91011	6.91011	1.18603	10.7261	7.16563	7.16563	1.08296	11.4337	0.504509	-0.255528	NM_002372 // RefSeq // Homo sapiens mannosidase, alpha, class 2A, member 1 (MAN2	NM_002372
54	3671727	NM_014861 // RefSeq // Homo sapiens ATPase, Ca++ transporting, type 2C, member 2	NM_014861 // Hs.6168 // lung; colon; bladder; blood; liver; ovary; whole brain;	chr16	+	82959644	83061415	301	NM_014861 // ATP2C2 // ATPase, Ca++ transporting, type 2C, member 2 // 16q24.1 /	0.249425	0	0.00513887	0	5.34552	5.34552	1.38179	9.4382	5.70004	5.70004	1.73203	10.0422	0.249425	-0.354515	NM_014861 // RefSeq // Homo sapiens ATPase, Ca++ transporting, type 2C, member 2	NM_014861
30	3072368	NM_016478 // RefSeq // Homo sapiens zinc finger, C3HC-type containing 1 (ZC3HC1)	NM_016478 // Hs.194157 // brain; testis; muscle; uncharacterized tissue; lung; p	chr7	-	129445374	129513370	164	NM_016478 // ZC3HC1 // zinc finger, C3HC-type containing 1 // 7q32.2 // 51530	0.245168	0	0.00515847	0	5.26253	5.26253	1.16327	8.60339	5.61361	5.61361	1.37955	8.87895	0.245168	-0.351078	NM_016478 // RefSeq // Homo sapiens zinc finger, C3HC-type containing 1 (ZC3HC1)	NM_016478
20	3831168	NM_001749 // RefSeq // Homo sapiens calpain, small subunit 1 (CAPNS1), transcrip	NM_001749 // Hs.515371 // lung; brain; uterus; pancreas; prostate; mammary gland	chr19	+	41322757	41333136	198	NM_001749 // CAPNS1 // calpain, small subunit 1 // 19q13.12 // 826 /// NM_001003	0.184467	0	0.00521633	0	8.21212	8.21212	2.48751	12.4857	8.67876	8.67876	2.75765	12.9596	0.184467	-0.466637	NM_001749 // RefSeq // Homo sapiens calpain, small subunit 1 (CAPNS1), transcrip	NM_001749
8	2710632	ENST00000354905 // ENSEMBL Transcript // SRSR846 (UNQ846), mRNA gene:ENSG0000019	NM_207316 // Hs.335321 // kidney; connective tissue	chr3	-	191629142	191650349	37	NM_207316 // UNQ846 // SRSR846 // 3q28 // 131920	0.564629	1.44279e-38	0.00521736	2.47091e-10	3.60349	3.60349	0.841935	6.00316	3.75119	3.75119	0.871403	6.71269	0.564629	-0.147694	ENST00000354905 // ENSEMBL Transcript // SRSR846 (UNQ846), mRNA gene:ENSG0000019	ENST00000354905
24	3373845	NM_017611 // RefSeq // Homo sapiens solute carrier family 43, member 3 (SLC43A3)	NM_017611 // Hs.99962 // uncharacterized tissue; brain; lung; blood; uterus; con	chr11	-	56931008	56951629	119	NM_017611 // SLC43A3 // solute carrier family 43, member 3 // 11q11 // 29015 ///	0.0980997	0	0.00527282	0	5.10932	5.10932	1.76718	9.51674	5.7517	5.7517	2.04096	10.0023	0.0980997	-0.642376	NM_017611 // RefSeq // Homo sapiens solute carrier family 43, member 3 (SLC43A3)	NM_017611
44	3623206	NM_014985 // RefSeq // Homo sapiens centrosomal protein 152kDa (CEP152), mRNA. /	NM_014985 // Hs.597323 // liver; embryonic tissue; testis; mixed; uncharacterize	chr15	-	46792437	46890552	201	NM_014985 // CEP152 // centrosomal protein 152kDa // 15q21.1 // 22995 /// AB0207	0.280046	0	0.00528413	0	3.35416	3.35416	0.747535	7.14279	3.62816	3.62816	0.871403	8.10386	0.280046	-0.273997	NM_014985 // RefSeq // Homo sapiens centrosomal protein 152kDa (CEP152), mRNA. /	NM_014985
30	3726772	NM_016424 // RefSeq // Homo sapiens cisplatin resistance-associated overexpresse	NM_016424 // Hs.130293 // brain; liver; thymus; pancreas; uterus; lung; embryoni	chr17	+	46151963	46186589	165	NM_016424 // CROP // cisplatin resistance-associated overexpressed protein // 17	0.420342	0	0.00532542	0	7.23079	7.23079	1.22031	11.2998	7.55167	7.55167	1.87119	11.5567	0.420342	-0.320881	NM_016424 // RefSeq // Homo sapiens cisplatin resistance-associated overexpresse	NM_016424
27	3848584	NM_007260 // RefSeq // Homo sapiens lysophospholipase II (LYPLA2), mRNA. // chr1	NM_007260 // Hs.533479 // placenta; blood; skin; eye; mixed; tonsil; dorsal root	chr19	-	7839611	7850891	158	NM_007260 // LYPLA2 // lysophospholipase II // 1p36.12-p35.1 // 11313 /// NR_001	0.0715935	0	0.00536782	0	6.58147	6.58147	1.97165	9.86958	7.15236	7.15236	3.32067	10.5334	0.0715935	-0.570894	NM_007260 // RefSeq // Homo sapiens lysophospholipase II (LYPLA2), mRNA. // chr1	NM_007260
13	3618315	XM_943641 // RefSeq // PREDICTED: Homo sapiens hypothetical protein LOC145845 (L	XM_943641 // Hs.302693 // embryonic tissue; testis; brain; lung; whole brain	chr15	-	34919900	34961161	68	XM_943641 // LOC145845 // hypothetical protein LOC145845 // 15q14 // 145845	0.416859	0	0.00546528	2.12086e-16	4.01104	4.01104	1.27895	7.3089	4.21147	4.21147	1.26048	7.61582	0.416859	-0.200435	XM_943641 // RefSeq // PREDICTED: Homo sapiens hypothetical protein LOC145845 (L	XM_943641
51	3604287	NM_172217 // RefSeq // Homo sapiens interleukin 16 (lymphocyte chemoattractant f	NM_172217 // Hs.459095 // brain; uncharacterized tissue; thymus; blood; lymph no	chr15	+	79262148	79392377	280	NM_172217 // IL16 // interleukin 16 (lymphocyte chemoattractant factor) // 15q26	0.212175	0	0.0054762	0	4.55903	4.55903	0.85566	9.05509	4.91718	4.91718	1.11664	9.49842	0.212175	-0.358158	NM_172217 // RefSeq // Homo sapiens interleukin 16 (lymphocyte chemoattractant f	NM_172217
109	3797561	NM_005559 // RefSeq // Homo sapiens laminin, alpha 1 (LAMA1), mRNA. // chr18 //	NM_005559 // Hs.270364 // testis; uncharacterized tissue; mixed; embryonic tissu	chr18	-	6921876	7107803	557	NM_005559 // LAMA1 // laminin, alpha 1 // 18p11.31 // 284217 /// AK091949 // LAM	0.239054	0	0.00549605	0	4.78852	4.78852	1.18687	9.42951	5.15843	5.15843	1.46419	10.1161	0.239054	-0.369903	NM_005559 // RefSeq // Homo sapiens laminin, alpha 1 (LAMA1), mRNA. // chr18 //	NM_005559
33	3902560	NM_177991 // RefSeq // Homo sapiens dual specificity phosphatase 15 (DUSP15), tr	NM_177991 // Hs.585017 // brain; testis; mixed; uncharacterized tissue; pancreas	chr20	-	29899101	29922211	131	NM_177991 // DUSP15 // dual specificity phosphatase 15 // 20q11.21 // 128853 ///	0.143372	0	0.00552068	0	5.43763	5.43763	1.38395	10.0828	5.89191	5.89191	2.29311	10.4648	0.143372	-0.454286	NM_177991 // RefSeq // Homo sapiens dual specificity phosphatase 15 (DUSP15), tr	NM_177991
25	3268548	AK127173 // GenBank // Homo sapiens cDNA FLJ45238 fis, clone BRCOC2001355. // ch	AK127173 // Hs.281004 // mixed; brain; testis; placenta; liver; embryonic tissue	chr10	+	124703907	124747016	127	AK127173 // C10orf89 // chromosome 10 open reading frame 89 // 10q26.13 // 11867	0.101121	0	0.00553696	4.71126e-34	4.7078	4.7078	1.47762	7.81139	5.20356	5.20356	2.07791	8.11578	0.101121	-0.49576	AK127173 // GenBank // Homo sapiens cDNA FLJ45238 fis, clone BRCOC2001355. // ch	AK127173
13	2955061	NM_178148 // RefSeq // Homo sapiens solute carrier family 35, member B2 (SLC35B2	NM_178148 // Hs.182885 // brain; skin; uncharacterized tissue; testis; mammary g	chr6	-	44329284	44333255	52	NM_178148 // SLC35B2 // solute carrier family 35, member B2 // 6p12.1-p11.2 // 3	0.116078	0	0.00555529	2.92102e-30	6.25633	6.25633	3.48673	9.20197	6.84733	6.84733	4.07962	10.0121	0.116078	-0.591	NM_178148 // RefSeq // Homo sapiens solute carrier family 35, member B2 (SLC35B2	NM_178148
29	3277751	NM_014142 // RefSeq // Homo sapiens nudix (nucleoside diphosphate linked moiety	NM_014142 // Hs.555956 // brain; skin; lung; pharynx; placenta; blood; thymus; w	chr10	-	12246862	12278149	154	NM_014142 // NUDT5 // nudix (nucleoside diphosphate linked moiety X)-type motif	0.330471	0	0.00556174	0	4.70019	4.70019	1.24735	7.75645	5.04228	5.04228	0.920472	8.27258	0.330471	-0.342093	NM_014142 // RefSeq // Homo sapiens nudix (nucleoside diphosphate linked moiety	NM_014142
8	2728163	ENST00000381277 // ENSEMBL Transcript // cdna:novel chromosome:NCBI36:4:5697143	XM_936833 // Hs.645215 // brain; adipose tissue; liver /// XM_927389 // Hs.64521	chr4	+	56971427	56989404	35	XM_936833 // LOC644196 // similar to CG10151-PA, isoform A // 4q12 // 644196 ///	0.229732	3.01698e-26	0.00556395	6.56681e-09	4.19548	4.19548	2.16486	6.46861	4.54345	4.54345	1.64936	6.88405	0.229732	-0.347965	ENST00000381277 // ENSEMBL Transcript // cdna:novel chromosome:NCBI36:4:5697143	ENST00000381277
20	3914021	NM_012384 // RefSeq // Homo sapiens glucocorticoid modulatory element binding pr	NM_012384 // Hs.473286 // mixed; lung; esophagus; cervix; brain; embryonic tissu	chr20	-	61689405	61729875	89	NM_012384 // GMEB2 // glucocorticoid modulatory element binding protein 2 // 20q	0.124803	0	0.00557973	0	6.05929	6.05929	2.17586	8.90036	6.52748	6.52748	2.56896	9.40376	0.124803	-0.468194	NM_012384 // RefSeq // Homo sapiens glucocorticoid modulatory element binding pr	NM_012384
46	3239584	NM_017433 // RefSeq // Homo sapiens myosin IIIA (MYO3A), mRNA. // chr10 // 100 /	NM_017433 // Hs.131367 // uncharacterized tissue; testis; pancreas; mixed; eye;	chr10	+	26262807	26541462	298	NM_017433 // MYO3A // myosin IIIA // 10p11.1 // 53904 /// BC036079 // MYO3A // m	0.111042	0	0.00559219	1.4013e-45	3.27455	3.27455	0.982627	7.58026	3.60411	3.60411	0.994383	8.65961	0.111042	-0.329562	NM_017433 // RefSeq // Homo sapiens myosin IIIA (MYO3A), mRNA. // chr10 // 100 /	NM_017433
6	3443679	BC065494 // GenBank // Homo sapiens DEAD/H (Asp-Glu-Ala-Asp/His) box polypeptide	BC065494 // Hs.504688 // uncharacterized tissue; colon; lung; lymph node; embryo	chr12	-	9461576	9492092	335	BC065494 // DDX12 // DEAD/H (Asp-Glu-Ala-Asp/His) box polypeptide 12 (CHL1-like	0.0210158	8.94748e-26	0.00559978	0.00143173	4.54601	4.54601	1.04426	8.13585	5.19304	5.19304	2.51936	8.4917	0.0210158	-0.647028	BC065494 // GenBank // Homo sapiens DEAD/H (Asp-Glu-Ala-Asp/His) box polypeptide	BC065494
23	3866491	NM_020160 // RefSeq // Homo sapiens Meis1, myeloid ecotropic viral integration s	NM_020160 // Hs.380923 // brain; adrenal gland; bladder; mixed; ovary; stomach;	chr19	-	52598195	52614579	157	NM_020160 // MEIS3 // Meis1, myeloid ecotropic viral integration site 1 homolog	0.114546	0	0.00560403	0	6.38035	6.38035	2.4725	9.34881	6.87394	6.87394	2.2943	9.71692	0.114546	-0.493589	NM_020160 // RefSeq // Homo sapiens Meis1, myeloid ecotropic viral integration s	NM_020160
46	3626312	NM_170696 // RefSeq // Homo sapiens aldehyde dehydrogenase 1 family, member A2 (	NM_170696 // Hs.643455 // testis; uterus; brain; prostate; uncharacterized tissu	chr15	-	56011783	56145898	245	NM_170696 // ALDH1A2 // aldehyde dehydrogenase 1 family, member A2 // 15q22.1 //	0.133818	0	0.00561877	0	4.7929	4.7929	1.49508	10.924	5.22295	5.22295	0.961333	11.2688	0.133818	-0.430054	NM_170696 // RefSeq // Homo sapiens aldehyde dehydrogenase 1 family, member A2 (	NM_170696
5	2494053	NM_013434 // RefSeq // Homo sapiens Kv channel interacting protein 3, calsenilin	NM_013434 // Hs.437376 // brain; whole brain; uncharacterized tissue; kidney; mi	chr2	+	95347321	95368346	24	NM_013434 // KCNIP3 // Kv channel interacting protein 3, calsenilin // 2q21.1 //	0.331709	1.50494e-19	0.00563742	7.53643e-07	5.34899	5.34899	3.09452	7.88267	5.64318	5.64318	3.64609	8.4852	0.331709	-0.29419	NM_013434 // RefSeq // Homo sapiens Kv channel interacting protein 3, calsenilin	NM_013434
5	3856908	BC021822 // GenBank // Homo sapiens chromosome 19 open reading frame 9, mRNA (cD	BC021822 // Hs.568380 // --- /// BC021822 // Hs.646401 // uncharacterized tissue	chr19	-	22717602	22729507	24	BC021822 // ZNF99 // zinc finger protein 99 // 19p12 // 7652	0.178265	1.44089e-08	0.00565436	3.22762e-06	3.42687	3.42687	1.06267	5.42381	3.82879	3.82879	2.35281	5.50795	0.178265	-0.401918	BC021822 // GenBank // Homo sapiens chromosome 19 open reading frame 9, mRNA (cD	BC021822
17	3262509	NM_004832 // RefSeq // Homo sapiens glutathione S-transferase omega 1 (GSTO1), m	NM_004832 // Hs.190028 // skin; lung; mixed; brain; placenta; pancreas; uncharac	chr10	+	105985123	106017889	96	NM_004832 // GSTO1 // glutathione S-transferase omega 1 // 10q25.1 // 9446 /// B	0.231455	0	0.00565679	6.61369e-37	4.94102	4.94102	1.35283	8.90038	5.36447	5.36447	1.35739	9.24427	0.231455	-0.423446	NM_004832 // RefSeq // Homo sapiens glutathione S-transferase omega 1 (GSTO1), m	NM_004832
22	3420497	NM_033647 // RefSeq // Homo sapiens helicase (DNA) B (HELB), mRNA. // chr12 // 1	NM_033647 // Hs.505941 // muscle; brain; mixed; bone; mammary gland; uncharacter	chr12	+	64982572	65028539	140	NM_033647 // HELB // helicase (DNA) B // 12q14.3 // 92797 /// BC037946 // HELB /	0.236411	0	0.00569244	3.27452e-28	3.90279	3.90279	1.24941	7.4865	4.2081	4.2081	1.29629	7.98061	0.236411	-0.305314	NM_033647 // RefSeq // Homo sapiens helicase (DNA) B (HELB), mRNA. // chr12 // 1	NM_033647
32	3675047	NM_003502 // RefSeq // Homo sapiens axin 1 (AXIN1), transcript variant 1, mRNA.	NM_003502 // Hs.592082 // brain; thyroid; bone marrow; blood; lymph node; ovary;	chr16	-	277442	351633	192	NM_003502 // AXIN1 // axin 1 // 16p13.3 // 8312 /// NM_181050 // AXIN1 // axin 1	0.0864368	0	0.00569423	0	5.82075	5.82075	1.84088	9.07516	6.35474	6.35474	2.46394	9.68889	0.0864368	-0.533986	NM_003502 // RefSeq // Homo sapiens axin 1 (AXIN1), transcript variant 1, mRNA.	NM_003502
3	2739070	AK127166 // GenBank // Homo sapiens cDNA FLJ45231 fis, clone BRCAN2021452. // na	AK127166 // Hs.518784 // brain	chr4	+	110443650	110456730	12	AK127166 // ZCCHC23 // zinc finger, CCHC domain containing 23 // 4q25 // 645078	0.209365	3.84703e-16	0.00570977	8.42168e-05	4.23054	4.23054	1.37651	6.71358	4.63704	4.63704	2.67585	6.99336	0.209365	-0.4065	AK127166 // GenBank // Homo sapiens cDNA FLJ45231 fis, clone BRCAN2021452. // na	AK127166
4	3464825	XM_001126495 // RefSeq // PREDICTED: Homo sapiens hypothetical protein LOC728084	XM_001126495 // Hs.132563 // brain; mixed; uncharacterized tissue	chr12	-	87929044	87937590	20	XM_001126495 // KRTHB5 // keratin, hair, basic, 5 // 12q21.33 // 728084 /// XM_0	0.427535	1.6613e-05	0.00571409	1.68133e-08	5.34812	5.34812	2.59876	6.83288	5.68685	5.68685	3.71203	7.27305	0.427535	-0.338731	XM_001126495 // RefSeq // PREDICTED: Homo sapiens hypothetical protein LOC728084	XM_001126495
42	3332334	NM_206938 // RefSeq // Homo sapiens membrane-spanning 4-domains, subfamily A, me	NM_206938 // Hs.530735 // testis; mixed; placenta; uncharacterized tissue; lung;	chr11	+	59887296	59941785	197	NM_206938 // MS4A7 // membrane-spanning 4-domains, subfamily A, member 7 // 11q1	0.13421	0	0.00574006	0	3.82646	3.82646	0.747535	7.16186	4.31042	4.31042	1.36241	8.06916	0.13421	-0.483957	NM_206938 // RefSeq // Homo sapiens membrane-spanning 4-domains, subfamily A, me	NM_206938
6	3906923	BC030259 // GenBank // Homo sapiens chromosome 20 open reading frame 62, mRNA (c	BC030259 // Hs.357589 // testis; mixed; brain	chr20	-	42514038	42527398	24	BC030259 // C20orf62 // chromosome 20 open reading frame 62 // 20q13.12 // 14083	0.517578	2.80883e-30	0.00575537	2.09436e-07	4.17849	4.17849	1.34981	7.80181	4.37897	4.37897	1.86606	8.12074	0.517578	-0.200479	BC030259 // GenBank // Homo sapiens chromosome 20 open reading frame 62, mRNA (c	BC030259
97	3712978	NM_016239 // RefSeq // Homo sapiens myosin XVA (MYO15A), mRNA. // chr17 // 100 /	NM_016239 // Hs.462390 // brain; whole brain; testis; mixed; pituitary gland; st	chr17	+	17952755	18023841	433	NM_016239 // MYO15A // myosin XVA // 17p11.2 // 51168 /// AL713794 // MYO15A //	0.175633	0	0.00577552	0	5.40941	5.40941	1.18798	9.92868	5.817	5.817	1.05615	10.4727	0.175633	-0.407594	NM_016239 // RefSeq // Homo sapiens myosin XVA (MYO15A), mRNA. // chr17 // 100 /	NM_016239
23	3120021	NM_003801 // RefSeq // Homo sapiens glycosylphosphatidylinositol anchor attachme	NM_003801 // Hs.627962 // brain; uncharacterized tissue; skin; placenta; kidney;	chr8	+	145209238	145213099	103	NM_003801 // GPAA1 // glycosylphosphatidylinositol anchor attachment protein 1 h	0.186306	0	0.00582078	0	6.4966	6.4966	2.94994	9.96483	7.01948	7.01948	1.66269	10.1944	0.186306	-0.522875	NM_003801 // RefSeq // Homo sapiens glycosylphosphatidylinositol anchor attachme	NM_003801
18	3477525	XM_932212 // RefSeq // PREDICTED: Homo sapiens hypothetical LOC644489 (LOC644489	XM_932212 // Hs.170413 // testis; connective tissue	chr12	-	126681767	126837451	164	XM_932212 // LOC644489 // hypothetical LOC644489 // 12q24.32 // 644489 /// XM_94	0.275965	0	0.00582542	3.9585e-13	3.89523	3.89523	1.24357	6.78519	4.15704	4.15704	1.07774	7.23895	0.275965	-0.261808	XM_932212 // RefSeq // PREDICTED: Homo sapiens hypothetical LOC644489 (LOC644489	XM_932212
14	2417140	BC047053 // GenBank // Homo sapiens chromosome 1 open reading frame 141, mRNA (c	BC047053 // Hs.125614 // testis; mixed; lung; brain /// NM_001013674 // Hs.12561	chr1	-	67330467	67373231	62	BC047053 // C1orf141 // chromosome 1 open reading frame 141 // 1p31.3 // 400757	0.104785	0	0.00584229	1.20373e-12	3.21264	3.21264	1.10626	8.22541	3.55607	3.55607	1.35743	8.67706	0.104785	-0.343421	BC047053 // GenBank // Homo sapiens chromosome 1 open reading frame 141, mRNA (c	BC047053
13	3910724	NM_080617 // RefSeq // Homo sapiens cerebellin 4 precursor (CBLN4), mRNA. // chr	NM_080617 // Hs.126141 // brain; whole brain; colon; testis; nerve; liver; mixed	chr20	-	53920660	54013937	90	NM_080617 // CBLN4 // cerebellin 4 precursor // 20q13.13-q13.33 // 140689	0.112789	0	0.00586613	9.25313e-34	6.22729	6.22729	2.05681	11.126	6.80366	6.80366	2.14677	11.4459	0.112789	-0.576376	NM_080617 // RefSeq // Homo sapiens cerebellin 4 precursor (CBLN4), mRNA. // chr	NM_080617
20	3850960	NM_032281 // RefSeq // Homo sapiens ELAV (embryonic lethal, abnormal vision, Dro	NM_032281 // Hs.1701 // brain; whole brain; eye; uncharacterized tissue; lung; b	chr19	-	11423141	11452841	94	NM_032281 // ELAVL3 // ELAV (embryonic lethal, abnormal vision, Drosophila)-like	0.273948	0	0.0058911	0	8.71622	8.71622	4.7773	11.9	9.08481	9.08481	5.66673	12.4181	0.273948	-0.368586	NM_032281 // RefSeq // Homo sapiens ELAV (embryonic lethal, abnormal vision, Dro	NM_032281
15	2432607	NR_002328 // RefSeq // Homo sapiens gonadotropin-releasing hormone (type 2) rece	NR_002328 // Hs.356873 // prostate; brain; amniotic fluid; stomach; muscle; unch	chr1	-	144220602	144228873	70	NR_002328 // GNRHR2 // gonadotropin-releasing hormone (type 2) receptor 2 // 1q1	0.298806	0	0.00592157	6.39135e-21	5.69388	5.69388	2.17942	8.31965	6.0125	6.0125	2.64579	9.02201	0.298806	-0.318619	NR_002328 // RefSeq // Homo sapiens gonadotropin-releasing hormone (type 2) rece	NR_002328
32	3908786	NM_017453 // RefSeq // Homo sapiens staufen, RNA binding protein, homolog 1 (Dro	NM_017453 // Hs.596704 // brain; testis; whole brain; placenta; thymus; uncharac	chr20	-	47162794	47238316	154	NM_017453 // STAU1 // staufen, RNA binding protein, homolog 1 (Drosophila) // 20	0.275547	0	0.00592426	0	6.93183	6.93183	1.9713	10.4938	7.29155	7.29155	2.59409	11.0889	0.275547	-0.359726	NM_017453 // RefSeq // Homo sapiens staufen, RNA binding protein, homolog 1 (Dro	NM_017453
5	3677643	XM_929133 // RefSeq // PREDICTED: Homo sapiens hypothetical LOC646174 (LOC646174	XM_929133 // Hs.632224 // mixed; testis	chr16	-	3469535	3486426	36	XM_929133 // LOC646174 // hypothetical LOC646174 // 16p13.3 // 646174 /// XM_940	0.228678	1.15758e-29	0.00592451	6.64158e-09	4.96816	4.96816	1.41407	6.70563	5.36841	5.36841	1.60262	7.40578	0.228678	-0.400242	XM_929133 // RefSeq // PREDICTED: Homo sapiens hypothetical LOC646174 (LOC646174	XM_929133
5	2351233	NM_203412 // RefSeq // Homo sapiens ubiquitin-like 4B (UBL4B), mRNA. // chr1 //	NM_203412 // Hs.374027 // brain; testis; eye	chr1	+	110447564	110458526	22	NM_203412 // UBL4B // ubiquitin-like 4B // 1p13.3 // 164153	0.290621	4.52619e-25	0.00599106	1.1079e-10	5.71383	5.71383	3.82494	7.65203	6.0493	6.0493	3.70323	8.42643	0.290621	-0.335466	NM_203412 // RefSeq // Homo sapiens ubiquitin-like 4B (UBL4B), mRNA. // chr1 //	NM_203412
22	2604254	NM_018410 // RefSeq // Homo sapiens hypothetical protein DKFZp762E1312 (DKFZp762	NM_018410 // Hs.532968 // mouth; testis; mixed; pancreas; small intestine; vascu	chr2	-	234406876	234427931	99	NM_018410 // DKFZp762E1312 // hypothetical protein DKFZp762E1312 // 2q37.1 // 55	0.201161	0	0.00602214	2.95534e-42	4.51776	4.51776	1.15654	8.33903	4.89004	4.89004	1.12175	8.64053	0.201161	-0.372281	NM_018410 // RefSeq // Homo sapiens hypothetical protein DKFZp762E1312 (DKFZp762	NM_018410
53	3621194	NM_005657 // RefSeq // Homo sapiens tumor protein p53 binding protein, 1 (TP53BP	NM_005657 // Hs.440968 // brain; mammary gland; uterus; mixed; skin; embryonic t	chr15	-	41482559	41590084	271	NM_005657 // TP53BP1 // tumor protein p53 binding protein, 1 // 15q15-q21 // 715	0.375603	0	0.00602944	0	6.55371	6.55371	0.994953	9.6188	6.87265	6.87265	1.8998	10.204	0.375603	-0.318944	NM_005657 // RefSeq // Homo sapiens tumor protein p53 binding protein, 1 (TP53BP	NM_005657
13	3027074	AK057548 // GenBank // Homo sapiens cDNA FLJ32986 fis, clone THYMU1000029. // ch	AK057548 // Hs.57806 // brain; mixed; uterus; embryonic tissue; whole brain; adr	chr7	+	138848492	138907647	135	AK057548 // CLEC2L // C-type lectin domain family 2, member L // 7q34 // 154790	0.166338	0	0.00610205	2.3164e-33	6.48243	6.48243	2.34105	9.84937	7.00982	7.00982	3.66945	10.2635	0.166338	-0.527388	AK057548 // GenBank // Homo sapiens cDNA FLJ32986 fis, clone THYMU1000029. // ch	AK057548
44	2925871	NM_005021 // RefSeq // Homo sapiens ectonucleotide pyrophosphatase/phosphodieste	NM_005021 // Hs.486489 // liver; brain; trachea; kidney; mixed; pancreas; uterus	chr6	+	132000135	132141394	214	NM_005021 // ENPP3 // ectonucleotide pyrophosphatase/phosphodiesterase 3 // 6q22	0.265055	0	0.00610806	0	3.49684	3.49684	0.916057	6.81391	3.76666	3.76666	1.24091	7.40737	0.265055	-0.269816	NM_005021 // RefSeq // Homo sapiens ectonucleotide pyrophosphatase/phosphodieste	NM_005021
15	3835966	NM_006509 // RefSeq // Homo sapiens v-rel reticuloendotheliosis viral oncogene h	NM_006509 // Hs.307905 // uncharacterized tissue; placenta; thymus; stomach; ova	chr19	+	50196537	50233287	61	NM_006509 // RELB // v-rel reticuloendotheliosis viral oncogene homolog B, nucle	0.0479147	0	0.00613048	1.39316e-35	5.80173	5.80173	1.59599	8.05039	6.48144	6.48144	3.46205	8.89588	0.0479147	-0.679711	NM_006509 // RefSeq // Homo sapiens v-rel reticuloendotheliosis viral oncogene h	NM_006509
12	3645626	NM_001012633 // RefSeq // Homo sapiens interleukin 32 (IL32), transcript variant	NM_001012633 // Hs.943 // kidney; liver; thyroid; lung; colon; blood; whole brai	chr16	+	3055308	3072235	103	NM_001012633 // IL32 // interleukin 32 // 16p13.3 // 9235 /// NM_001012635 // IL	0.0997545	0	0.00617205	1.3353e-24	5.76507	5.76507	1.6602	8.82111	6.27431	6.27431	3.18295	9.13599	0.0997545	-0.509244	NM_001012633 // RefSeq // Homo sapiens interleukin 32 (IL32), transcript variant	NM_001012633
26	2952834	NM_003740 // RefSeq // Homo sapiens potassium channel, subfamily K, member 5 (KC	NM_003740 // Hs.444448 // placenta; kidney; uncharacterized tissue; small intest	chr6	-	39263902	39305398	139	NM_003740 // KCNK5 // potassium channel, subfamily K, member 5 // 6p21 // 8645	0.281254	0	0.00617568	0	4.77833	4.77833	1.68768	7.48593	5.09535	5.09535	1.25248	8.14293	0.281254	-0.317025	NM_003740 // RefSeq // Homo sapiens potassium channel, subfamily K, member 5 (KC	NM_003740
60	3924144	NM_130445 // RefSeq // Homo sapiens collagen, type XVIII, alpha 1 (COL18A1), tra	NM_130445 // Hs.517356 // embryonic tissue; pancreas; ovary; uterus; brain; mixe	chr21	+	45649495	45758055	304	NM_130445 // COL18A1 // collagen, type XVIII, alpha 1 // 21q22.3 // 80781 /// NM	0.172688	0	0.00619311	0	6.58968	6.58968	2.09372	9.35857	7.02363	7.02363	2.44865	10.0797	0.172688	-0.433956	NM_130445 // RefSeq // Homo sapiens collagen, type XVIII, alpha 1 (COL18A1), tra	NM_130445
2	2526723	ENSESTT00000048369 // ENSEMBL EST // --- // chr2 // 100 // 100 // 8 // 8 // 0	ENSESTT00000048369 // Hs.534458 // brain; placenta; lung; mixed; uterus; mammary	chr2	+	215595549	215596067	8	ENSESTT00000048369 // CGI-38 // brain specific protein // 16q22.1 // 51673	0.639773	0.000131278	0.00623907	0.000128942	3.47107	3.47107	1.34544	5.77284	3.6648	3.6648	2.65512	4.32712	0.639773	-0.193732	ENSESTT00000048369 // ENSEMBL EST // --- // chr2 // 100 // 100 // 8 // 8 // 0	ENSESTT00000048369
37	3822723	NM_002741 // RefSeq // Homo sapiens protein kinase N1 (PKN1), transcript variant	NM_002741 // Hs.466044 // uncharacterized tissue; brain; lung; lymph; eye; kidne	chr19	+	14404682	14443996	187	NM_002741 // PKN1 // protein kinase N1 // 19p13.1-p12 // 5585 /// NM_213560 // P	0.209986	0	0.00625514	0	6.90295	6.90295	2.74575	10.4427	7.31977	7.31977	2.56491	11.0127	0.209986	-0.416824	NM_002741 // RefSeq // Homo sapiens protein kinase N1 (PKN1), transcript variant	NM_002741
4	3397951	AK127847 // GenBank // Homo sapiens cDNA FLJ45950 fis, clone PLACE7008136. // ch	AL833062 // Hs.440379 // brain; colon; kidney; embryonic tissue; whole brain; ey	chr11	-	128608893	128658259	32	AK127847 // FLJ45950 // FLJ45950 protein // 11q24.3 // 399975 /// AL833062 // RI	0.648838	3.92805e-21	0.00630513	1.02522e-05	5.30321	5.30321	2.95387	7.3325	5.43795	5.43795	1.77128	8.27481	0.648838	-0.134745	AK127847 // GenBank // Homo sapiens cDNA FLJ45950 fis, clone PLACE7008136. // ch	AK127847
33	3816919	NM_205843 // RefSeq // Homo sapiens nuclear factor I/C (CCAAT-binding transcript	NM_205843 // Hs.170131 // brain; lung; prostate; eye; kidney; uterus; mixed; pla	chr19	+	3265759	3416371	196	NM_205843 // NFIC // nuclear factor I/C (CCAAT-binding transcription factor) //	0.0988253	0	0.00631076	0	6.3202	6.3202	1.77529	9.94095	6.82036	6.82036	1.65843	10.5359	0.0988253	-0.500166	NM_205843 // RefSeq // Homo sapiens nuclear factor I/C (CCAAT-binding transcript	NM_205843
45	3950522	NM_018995 // RefSeq // Homo sapiens Mov10l1, Moloney leukemia virus 10-like 1, h	NM_018995 // Hs.62880 // testis; brain; kidney; vascular; eye; lymph node; adipo	chr22	+	48870620	48943436	273	NM_018995 // MOV10L1 // Mov10l1, Moloney leukemia virus 10-like 1, homolog (mous	0.194972	0	0.00631225	0	4.56348	4.56348	1.31853	9.7761	4.95223	4.95223	1.4185	10.4498	0.194972	-0.388755	NM_018995 // RefSeq // Homo sapiens Mov10l1, Moloney leukemia virus 10-like 1, h	NM_018995
41	3703799	NM_017566 // RefSeq // Homo sapiens kelch domain containing 4 (KLHDC4), mRNA. //	NM_017566 // Hs.123450 // brain; uncharacterized tissue; mixed; adrenal gland; b	chr16	-	86287612	86357087	224	NM_017566 // KLHDC4 // kelch domain containing 4 // 16q24.3 // 54758 /// AK09709	0.122252	0	0.00636297	0	5.31343	5.31343	1.82366	9.16228	5.80442	5.80442	1.80821	9.82159	0.122252	-0.490987	NM_017566 // RefSeq // Homo sapiens kelch domain containing 4 (KLHDC4), mRNA. //	NM_017566
20	3838385	NM_001774 // RefSeq // Homo sapiens CD37 molecule (CD37), transcript variant 1,	NM_001774 // Hs.166556 // lymph node; tonsil; lymph; spleen; mixed; uncharacteri	chr19	+	54523897	54538384	112	NM_001774 // CD37 // CD37 molecule // 19q13.3 // 951 /// NM_001040031 // CD37 //	0.0442327	0	0.00636621	0	5.06293	5.06293	2.16596	8.81376	5.70967	5.70967	2.95602	9.12716	0.0442327	-0.646741	NM_001774 // RefSeq // Homo sapiens CD37 molecule (CD37), transcript variant 1,	NM_001774
6	3830993	NM_014266 // RefSeq // Homo sapiens hematopoietic cell signal transducer (HCST),	NM_014266 // Hs.117339 // mixed; uncharacterized tissue; blood; umbilical cord;	chr19	+	41085222	41087011	24	NM_014266 // HCST // hematopoietic cell signal transducer // 19q13.1 // 10870 //	0.100581	2.07308e-32	0.0064556	1.32494e-10	5.2862	5.2862	3.11746	8.70523	5.84083	5.84083	2.9421	9.19749	0.100581	-0.554628	NM_014266 // RefSeq // Homo sapiens hematopoietic cell signal transducer (HCST),	NM_014266
22	3912861	NM_002792 // RefSeq // Homo sapiens proteasome (prosome, macropain) subunit, alp	NM_002792 // Hs.233952 // mixed; brain; prostate; lung; liver; uncharacterized t	chr20	-	60144302	60151889	96	NM_002792 // PSMA7 // proteasome (prosome, macropain) subunit, alpha type, 7 //	0.342938	0	0.00648883	1.4013e-45	6.94162	6.94162	2.34877	11.6949	7.25866	7.25866	1.81932	12.0702	0.342938	-0.317038	NM_002792 // RefSeq // Homo sapiens proteasome (prosome, macropain) subunit, alp	NM_002792
4	3502113	XM_001129623 // RefSeq // PREDICTED: Homo sapiens hypothetical protein LOC729192	XM_001129623 // Hs.646610 // testis	chr13	+	112153849	112155808	16	XM_001129623 // LOC729192 // hypothetical protein LOC729192 // 13q34 // 729192 /	0.427344	0.00179057	0.00649448	3.49754e-10	4.75799	4.75799	3.03649	5.6985	5.02937	5.02937	3.98089	6.35436	0.427344	-0.271376	XM_001129623 // RefSeq // PREDICTED: Homo sapiens hypothetical protein LOC729192	XM_001129623
14	2809423	NM_002495 // RefSeq // Homo sapiens NADH dehydrogenase (ubiquinone) Fe-S protein	NM_002495 // Hs.528222 // brain; connective tissue; pancreas; vascular; ovary; h	chr5	+	52888547	53015151	118	NM_002495 // NDUFS4 // NADH dehydrogenase (ubiquinone) Fe-S protein 4, 18kDa (NA	0.333665	0	0.00656787	7.66068e-24	5.04455	5.04455	1.49185	9.75152	5.34229	5.34229	1.43757	10.1354	0.333665	-0.297742	NM_002495 // RefSeq // Homo sapiens NADH dehydrogenase (ubiquinone) Fe-S protein	NM_002495
28	2345929	NM_032270 // RefSeq // Homo sapiens leucine rich repeat containing 8 family, mem	NM_032270 // Hs.412836 // brain; mixed; testis; blood; uncharacterized tissue; s	chr1	+	89871229	90008050	217	NM_032270 // LRRC8C // leucine rich repeat containing 8 family, member C // 1p22	0.213621	0	0.00659104	0	5.47479	5.47479	1.94919	9.18677	5.87596	5.87596	2.54132	9.56367	0.213621	-0.401177	NM_032270 // RefSeq // Homo sapiens leucine rich repeat containing 8 family, mem	NM_032270
64	2893562	NM_001003699 // RefSeq // Homo sapiens ras responsive element binding protein 1	NM_001003699 // Hs.298248 // colon; mixed; lung; mammary gland; uncharacterized	chr6	+	7052829	7214191	445	NM_001003699 // RREB1 // ras responsive element binding protein 1 // 6p25 // 623	0.194909	0	0.00668849	0	5.14156	5.14156	1.45895	9.97791	5.51443	5.51443	1.21005	10.3468	0.194909	-0.372864	NM_001003699 // RefSeq // Homo sapiens ras responsive element binding protein 1	NM_001003699
27	3783529	NM_001943 // RefSeq // Homo sapiens desmoglein 2 (DSG2), mRNA. // chr18 // 100 /	NM_001943 // Hs.412597 // embryonic tissue; colon; kidney; mammary gland; testis	chr18	+	27331982	27382956	130	NM_001943 // DSG2 // desmoglein 2 // 18q12.1 // 1829	0.110451	0	0.00673024	6.12367e-42	4.26033	4.26033	1.09814	9.85095	4.65066	4.65066	1.51392	10.0875	0.110451	-0.390333	NM_001943 // RefSeq // Homo sapiens desmoglein 2 (DSG2), mRNA. // chr18 // 100 /	NM_001943
8	3332615	NM_024092 // RefSeq // Homo sapiens transmembrane protein 109 (TMEM109), mRNA. /	NM_024092 // Hs.13662 // placenta; skin; brain; mixed; kidney; ovary; pancreas;	chr11	+	60437942	60447443	38	NM_024092 // TMEM109 // transmembrane protein 109 // 11q12.2 // 79073 /// XM_001	0.119195	0	0.00673317	7.69766e-23	6.58935	6.58935	2.06415	9.50325	7.35625	7.35625	1.60677	10.2944	0.119195	-0.7669	NM_024092 // RefSeq // Homo sapiens transmembrane protein 109 (TMEM109), mRNA. /	NM_024092
24	3456313	NM_001002031 // RefSeq // Homo sapiens ATP synthase, H+ transporting, mitochondr	NM_001002031 // Hs.524464 // mixed; brain; prostate; embryonic tissue; spinal co	chr12	-	52312811	52382490	145	NM_001002031 // ATP5G2 // ATP synthase, H+ transporting, mitochondrial F0 comple	0.209682	0	0.00678131	2.63278e-38	5.09943	5.09943	1.21554	10.0125	5.44518	5.44518	1.27179	11.1471	0.209682	-0.345743	NM_001002031 // RefSeq // Homo sapiens ATP synthase, H+ transporting, mitochondr	NM_001002031
34	3576284	NM_182398 // RefSeq // Homo sapiens ribosomal protein S6 kinase, 90kDa, polypept	NM_182398 // Hs.510225 // brain; mixed; placenta; cochlea; stomach; cranial nerv	chr14	-	90406460	90680204	275	NM_182398 // RPS6KA5 // ribosomal protein S6 kinase, 90kDa, polypeptide 5 // 14q	0.568666	0	0.00678955	0	5.94287	5.94287	1.15263	9.41832	6.15558	6.15558	1.29219	9.84375	0.568666	-0.212708	NM_182398 // RefSeq // Homo sapiens ribosomal protein S6 kinase, 90kDa, polypept	NM_182398
37	3129065	NM_203339 // RefSeq // Homo sapiens clusterin (CLU), transcript variant 2, mRNA.	NM_203339 // Hs.436657 // brain; connective tissue; eye; testis; liver; thyroid;	chr8	-	27479029	27543630	177	NM_203339 // CLU // clusterin // 8p21-p12 // 1191 /// NM_001831 // CLU // cluste	0.184729	0	0.00679028	0	8.03598	8.03598	2.41872	14.0273	8.50276	8.50276	2.1252	13.9922	0.184729	-0.466775	NM_203339 // RefSeq // Homo sapiens clusterin (CLU), transcript variant 2, mRNA.	NM_203339
21	3992648	ENST00000356485 // ENSEMBL Transcript // CDNA FLJ25860 fis, clone CBR01771 gene:	AL157469 // Hs.389104 // brain; testis; embryonic tissue; pancreas; lung; mixed;	chrX	+	135819220	135931943	120	AL157469 // RABL5 // RAB, member RAS oncogene family-like 5 // 7q22.1 // 64792	0.279185	0	0.00679373	2.96896e-31	3.35252	3.35252	1.28455	5.42353	3.61741	3.61741	1.07543	5.95413	0.279185	-0.264891	ENST00000356485 // ENSEMBL Transcript // CDNA FLJ25860 fis, clone CBR01771 gene:	ENST00000356485
26	3396107	NM_138961 // RefSeq // Homo sapiens endothelial cell adhesion molecule (ESAM), m	NM_138961 // Hs.173840 // placenta; brain; mixed; lung; larynx; whole brain; col	chr11	-	124128245	124138337	122	NM_138961 // ESAM // endothelial cell adhesion molecule // 11q24.2 // 90952 ///	0.176724	0	0.00681283	0	5.08662	5.08662	1.88595	8.17379	5.54275	5.54275	2.44578	8.76383	0.176724	-0.456128	NM_138961 // RefSeq // Homo sapiens endothelial cell adhesion molecule (ESAM), m	NM_138961
2	3126184	XR_018720 // RefSeq // PREDICTED: Homo sapiens similar to ribosomal protein L10a	XR_018720 // Hs.545512 // mixed; connective tissue /// XR_017166 // Hs.545512 //	chr8	-	18285181	18285707	16	XR_018720 // LOC392206 // similar to ribosomal protein L10a // 8p22 // 392206 //	0.435271	7.40986e-09	0.0068168	0.0015596	3.89075	3.89075	2.13461	5.90136	4.15743	4.15743	2.60515	5.76686	0.435271	-0.266679	XR_018720 // RefSeq // PREDICTED: Homo sapiens similar to ribosomal protein L10a	XR_018720
4	2351418	AB209680 // GenBank // Homo sapiens mRNA for RNA binding motif protein 15 varian	AB209680 // Hs.435947 // uterus; lymph node; nerve; mammary gland; brain; unchar	chr1	+	110691430	110711955	16	AB209680 // RBM15 // RNA binding motif protein 15 // 1p13 // 64783	0.266323	4.64752e-06	0.00685898	1.68212e-10	6.04954	6.04954	4.46732	8.10375	6.46372	6.46372	5.26474	7.80199	0.266323	-0.414186	AB209680 // GenBank // Homo sapiens mRNA for RNA binding motif protein 15 varian	AB209680
31	3379390	NM_016028 // RefSeq // Homo sapiens suppressor of variegation 4-20 homolog 1 (Dr	NM_016028 // Hs.632120 // brain; mammary gland; placenta; whole brain; uterus; t	chr11	-	67678913	67738438	179	NM_016028 // SUV420H1 // suppressor of variegation 4-20 homolog 1 (Drosophila) /	0.336111	0	0.00688274	0	6.26839	6.26839	1.04426	9.5426	6.59104	6.59104	1.62767	9.71273	0.336111	-0.322643	NM_016028 // RefSeq // Homo sapiens suppressor of variegation 4-20 homolog 1 (Dr	NM_016028
18	3595846	NM_001040453 // RefSeq // Homo sapiens family with sequence similarity 63, membe	NM_001040453 // Hs.591122 // mammary gland; kidney; lung; embryonic tissue; plac	chr15	+	56850683	56941386	113	NM_001040453 // FAM63B // family with sequence similarity 63, member B // 15q22.	0.785967	0	0.00692397	4.42306e-41	5.55922	5.55922	1.49442	9.06666	5.66927	5.66927	1.83789	9.18548	0.785967	-0.110046	NM_001040453 // RefSeq // Homo sapiens family with sequence similarity 63, membe	NM_001040453
32	2788511	BC023288 // GenBank // Homo sapiens chromosome 4 open reading frame 13, mRNA (cD	BC023288 // Hs.374019 // muscle; mouth; testis; colon; uncharacterized tissue; m	chr4	-	147394589	147779899	290	BC023288 // SLC10A7 // solute carrier family 10 (sodium/bile acid cotransporter	0.208413	0	0.00692669	0	4.70655	4.70655	1.29677	8.82828	5.07697	5.07697	1.32149	9.13334	0.208413	-0.370416	BC023288 // GenBank // Homo sapiens chromosome 4 open reading frame 13, mRNA (cD	BC023288
43	3385834	NM_000842 // RefSeq // Homo sapiens glutamate receptor, metabotropic 5 (GRM5), m	NM_000842 // Hs.147361 // whole brain; brain; testis; mixed; eye; whole body; un	chr11	-	87877198	88438751	348	NM_000842 // GRM5 // glutamate receptor, metabotropic 5 // 11q14.2-q14.3 // 2915	0.312451	0	0.00693583	0	6.02686	6.02686	1.0068	10.4906	6.38976	6.38976	1.3038	10.8199	0.312451	-0.362893	NM_000842 // RefSeq // Homo sapiens glutamate receptor, metabotropic 5 (GRM5), m	NM_000842
12	3408573	NM_001001660 // RefSeq // Homo sapiens LYR motif containing 5 (LYRM5), mRNA. //	NM_001001660 // Hs.209151 // brain; testis; muscle; colon; prostate; cochlea; ad	chr12	+	25239446	25253826	87	NM_001001660 // LYRM5 // LYR motif containing 5 // 12p12.1 // 144363 /// AK09516	0.295899	0	0.00694169	4.51011e-22	5.45616	5.45616	1.43722	9.34497	5.8009	5.8009	1.13567	9.75422	0.295899	-0.344732	NM_001001660 // RefSeq // Homo sapiens LYR motif containing 5 (LYRM5), mRNA. //	NM_001001660
25	3674960	NM_018032 // RefSeq // Homo sapiens LUC7-like (S. cerevisiae) (LUC7L), transcrip	NM_018032 // Hs.16803 // brain; uncharacterized tissue; embryonic tissue; lung;	chr16	-	175451	219450	142	NM_018032 // LUC7L // LUC7-like (S. cerevisiae) // 16p13.3 // 55692 /// NM_20141	0.258147	0	0.00702687	0	6.62798	6.62798	1.71143	9.65051	7.03495	7.03495	2.04743	11.1259	0.258147	-0.406966	NM_018032 // RefSeq // Homo sapiens LUC7-like (S. cerevisiae) (LUC7L), transcrip	NM_018032
33	3881550	NM_001008409 // RefSeq // Homo sapiens tubulin tyrosine ligase-like family, memb	NM_001008409 // Hs.567752 // testis; brain; mixed; ovary; embryonic tissue; unch	chr20	+	29922166	29996423	147	NM_001008409 // TTLL9 // tubulin tyrosine ligase-like family, member 9 // 20q11.	0.158206	0	0.0070622	0	4.89922	4.89922	0.57106	8.12571	5.37043	5.37043	1.17974	8.56359	0.158206	-0.471208	NM_001008409 // RefSeq // Homo sapiens tubulin tyrosine ligase-like family, memb	NM_001008409
24	3712949	NM_001388 // RefSeq // Homo sapiens developmentally regulated GTP binding protei	NM_001388 // Hs.78582 // brain; uncharacterized tissue; mixed; cervix; muscle; w	chr17	+	17931828	17952001	106	NM_001388 // DRG2 // developmentally regulated GTP binding protein 2 // 17p11.2	0.0841342	0	0.00707631	0	5.90171	5.90171	2.50737	10.017	6.46706	6.46706	2.08992	10.3092	0.0841342	-0.565347	NM_001388 // RefSeq // Homo sapiens developmentally regulated GTP binding protei	NM_001388
8	4016726	NM_001002916 // RefSeq // Homo sapiens H2B histone family, member W, testis-spec	NM_001002916 // Hs.127778 // testis; mixed	chrX	-	103117006	103154888	39	NM_001002916 // H2BFWT // H2B histone family, member W, testis-specific // Xq22.	0.160908	0	0.00708875	2.22251e-10	4.33596	4.33596	1.94265	8.51449	4.70206	4.70206	2.19128	9.0027	0.160908	-0.366094	NM_001002916 // RefSeq // Homo sapiens H2B histone family, member W, testis-spec	NM_001002916
22	3315802	NM_007183 // RefSeq // Homo sapiens plakophilin 3 (PKP3), mRNA. // chr11 // 100	NM_007183 // Hs.534395 // colon; mouth; placenta; pancreas; uncharacterized tiss	chr11	+	382496	394907	100	NM_007183 // PKP3 // plakophilin 3 // 11p15 // 11187 /// XM_001129327 // PKP3 //	0.242607	0	0.00710018	0	6.18717	6.18717	2.86703	10.5057	6.53265	6.53265	2.30988	11.2274	0.242607	-0.34548	NM_007183 // RefSeq // Homo sapiens plakophilin 3 (PKP3), mRNA. // chr11 // 100	NM_007183
15	3955185	NM_004121 // RefSeq // Homo sapiens gamma-glutamyltransferase-like activity 1 (G	NM_004121 // Hs.437156 // brain; spleen; embryonic tissue; small intestine; uter	chr22	-	22945631	22971090	83	NM_004121 // GGTLA1 // gamma-glutamyltransferase-like activity 1 // 22q11.23 //	0.075464	0	0.00712559	6.57024e-37	6.48043	6.48043	2.37342	9.76236	7.06941	7.06941	3.73217	9.77683	0.075464	-0.588973	NM_004121 // RefSeq // Homo sapiens gamma-glutamyltransferase-like activity 1 (G	NM_004121
78	3675462	NM_022773 // RefSeq // Homo sapiens transmembrane protein 112 (TMEM112), mRNA. /	NM_022773 // Hs.71912 // brain; testis; uncharacterized tissue; thyroid; kidney;	chr16	-	809801	971585	420	NM_022773 // TMEM112 // transmembrane protein 112 // 16p13.3 // 64788 /// BC0107	0.168323	0	0.00713784	0	6.04165	6.04165	1.16454	10.0533	6.49566	6.49566	2.36455	10.5657	0.168323	-0.454013	NM_022773 // RefSeq // Homo sapiens transmembrane protein 112 (TMEM112), mRNA. /	NM_022773
6	4029510	GENSCAN00000055978 // ENSEMBL Prediction // cdna:Genscan chromosome:NCBI36:Y:88	XM_939896 // Hs.454401 // ---	chrY	+	8832112	8843985	36	NM_001006117 // RBMY1J // RNA binding motif protein, Y-linked, family 1, member	0.283193	1.39026e-32	0.0071561	1.86423e-05	3.38869	3.38869	1.08682	6.18707	3.63775	3.63775	1.54604	7.14666	0.283193	-0.249062	GENSCAN00000055978 // ENSEMBL Prediction // cdna:Genscan chromosome:NCBI36:Y:88	GENSCAN00000055978
47	2324919	NM_004442 // RefSeq // Homo sapiens EPH receptor B2 (EPHB2), transcript variant	NM_004442 // Hs.523329 // colon; uterus; brain; lung; eye; muscle; embryonic tis	chr1	+	22909891	23143168	300	NM_004442 // EPHB2 // EPH receptor B2 // 1p36.1-p35 // 2048 /// NM_017449 // EPH	0.160093	0	0.00720385	0	5.40401	5.40401	1.45973	9.98691	5.81018	5.81018	1.9441	10.6504	0.160093	-0.406172	NM_004442 // RefSeq // Homo sapiens EPH receptor B2 (EPHB2), transcript variant	NM_004442
21	2950474	NM_021976 // RefSeq // Homo sapiens retinoid X receptor, beta (RXRB), mRNA. // c	NM_021976 // Hs.388034 // brain; uncharacterized tissue; prostate; lung; testis;	chr6	-	33269346	33276722	105	NM_021976 // RXRB // retinoid X receptor, beta // 6p21.3 // 6257 /// X66424 // R	0.196844	0	0.00731739	0	6.96687	6.96687	2.86194	9.8467	7.4759	7.4759	4.06912	10.3165	0.196844	-0.509035	NM_021976 // RefSeq // Homo sapiens retinoid X receptor, beta (RXRB), mRNA. // c	NM_021976
16	3861302	NM_033557 // RefSeq // Homo sapiens Yip1 interacting factor homolog B (S. cerevi	NM_033557 // Hs.280741 // brain; lung; eye; skin; pancreas; kidney; mixed; uncha	chr19	-	43482328	43499733	88	NM_033557 // YIF1B // Yip1 interacting factor homolog B (S. cerevisiae) // 19q13	0.0913381	0	0.00732199	1.47756e-39	6.44314	6.44314	2.41043	11.9838	7.11196	7.11196	2.84962	12.303	0.0913381	-0.668826	NM_033557 // RefSeq // Homo sapiens Yip1 interacting factor homolog B (S. cerevi	NM_033557
48	2385343	NM_001012957 // RefSeq // Homo sapiens disrupted in schizophrenia 1 (DISC1), tra	NM_001012957 // Hs.13318 // uncharacterized tissue; brain; mixed; whole brain; p	chr1	+	229829184	230243641	444	NM_001012957 // DISC1 // disrupted in schizophrenia 1 // 1q42.1 // 27185 /// NM_	0.151782	0	0.00734097	0	4.55659	4.55659	1.15263	8.5485	4.97145	4.97145	0.808505	8.96332	0.151782	-0.414859	NM_001012957 // RefSeq // Homo sapiens disrupted in schizophrenia 1 (DISC1), tra	NM_001012957
2	2923685	XR_016618 // RefSeq // PREDICTED: Homo sapiens similar to ADP/ATP translocase 2	XR_016618 // Hs.648056 // --- /// XR_019195 // Hs.648056 // ---	chr6	+	122016579	122017535	32	XR_016618 // LOC442255 // similar to ADP/ATP translocase 2 (Adenine nucleotide t	0.290708	0.00591919	0.00734445	0.00739554	4.0495	4.0495	2.14657	5.26113	4.40712	4.40712	3.42394	5.74283	0.290708	-0.357624	XR_016618 // RefSeq // PREDICTED: Homo sapiens similar to ADP/ATP translocase 2	XR_016618
24	2761285	NM_148894 // RefSeq // Homo sapiens family with sequence similarity 44, member A	NM_148894 // Hs.444517 // ovary; cranial nerve; embryonic tissue; skin; thyroid;	chr4	-	13179462	13207890	131	NM_148894 // FAM44A // family with sequence similarity 44, member A // 4p16.1 //	0.468904	0	0.00742856	0	6.52817	6.52817	1.95225	9.44541	6.80481	6.80481	0.969542	10.4231	0.468904	-0.276636	NM_148894 // RefSeq // Homo sapiens family with sequence similarity 44, member A	NM_148894
14	3573229	NM_001039506 // RefSeq // Homo sapiens alkB, alkylation repair homolog 1 (E. col	NM_001039506 // Hs.94542 // embryonic tissue; mixed; stomach; uncharacterized ti	chr14	-	77208501	77244091	104	NM_001039506 // ALKBH1 // alkB, alkylation repair homolog 1 (E. coli) // 14q24.3	0.205779	0	0.00745393	8.99091e-33	5.05384	5.05384	1.72398	7.81055	5.57318	5.57318	2.3111	8.62496	0.205779	-0.51934	NM_001039506 // RefSeq // Homo sapiens alkB, alkylation repair homolog 1 (E. col	NM_001039506
3	2889198	ENST00000302857 // ENSEMBL Transcript // Hypothetical protein LOC202181 gene:ENS	AF086197 // Hs.189914 // testis; brain; placenta; lymph node; colon; whole body;	chr5	-	176976751	176980023	16	AF086197 // LOC202181 // hypothetical protein LOC202181 // 5q35.3 // 202181 ///	0.75253	1.28059e-08	0.00747069	3.28189e-07	4.40131	4.40131	2.36579	6.13672	4.53948	4.53948	2.49516	6.34788	0.75253	-0.138167	ENST00000302857 // ENSEMBL Transcript // Hypothetical protein LOC202181 gene:ENS	ENST00000302857
57	3772581	NM_025090 // RefSeq // Homo sapiens ubiquitin specific peptidase 36 (USP36), mRN	NM_025090 // Hs.464243 // mammary gland; brain; lung; uncharacterized tissue; co	chr17	-	74295075	74348574	267	NM_025090 // USP36 // ubiquitin specific peptidase 36 // 17q25.3 // 57602 /// BC	0.141537	0	0.00749226	0	5.90731	5.90731	0.943096	8.68387	6.41674	6.41674	0.972055	9.25768	0.141537	-0.509428	NM_025090 // RefSeq // Homo sapiens ubiquitin specific peptidase 36 (USP36), mRN	NM_025090
17	2592532	NM_004657 // RefSeq // Homo sapiens serum deprivation response (phosphatidylseri	NM_004657 // Hs.26530 // brain; lung; uncharacterized tissue; mixed; placenta; w	chr2	-	192364786	192442335	103	NM_004657 // SDPR // serum deprivation response (phosphatidylserine binding prot	0.121198	0	0.00751621	1.02788e-28	4.23868	4.23868	1.26606	7.80509	4.81298	4.81298	2.01347	8.43876	0.121198	-0.574301	NM_004657 // RefSeq // Homo sapiens serum deprivation response (phosphatidylseri	NM_004657
93	3734966	BC027875 // GenBank // Homo sapiens myosin XVB pseudogene, mRNA (cDNA clone IMAG	BC027875 // Hs.390817 // brain; colon; mixed; nerve; muscle; mouth; kidney; unch	chr17	+	71095734	71134518	458	BC027875 // MYO15B // myosin XVB pseudogene // 17q25.1 // 80022 /// AK074680 //	0.101152	0	0.00756099	0	5.99922	5.99922	1.30695	11.1271	6.5447	6.5447	2.60048	11.4193	0.101152	-0.545481	BC027875 // GenBank // Homo sapiens myosin XVB pseudogene, mRNA (cDNA clone IMAG	BC027875
23	2555604	NM_006430 // RefSeq // Homo sapiens chaperonin containing TCP1, subunit 4 (delta	NM_006430 // Hs.421509 // brain; testis; connective tissue; lung; liver; placent	chr2	-	61905493	61935511	99	NM_006430 // CCT4 // chaperonin containing TCP1, subunit 4 (delta) // 2p15 // 10	0.294402	0	0.00756148	5.85588e-39	4.29527	4.29527	0.897115	7.14145	4.59977	4.59977	1.38259	7.75897	0.294402	-0.304501	NM_006430 // RefSeq // Homo sapiens chaperonin containing TCP1, subunit 4 (delta	NM_006430
9	2400067	XM_372769 // RefSeq // PREDICTED: Homo sapiens similar to Group IIC secretory ph	XM_372769 // Hs.512512 // mixed; stomach /// XM_001129563 // Hs.512512 // mixed;	chr1	-	20348983	20387077	63	XM_372769 // RP3-340N1.3 // similar to Group IIC secretory phospholipase A2 prec	0.417974	0	0.00761177	4.59461e-19	4.55795	4.55795	1.56107	9.54299	4.81554	4.81554	2.13982	10.2593	0.417974	-0.257595	XM_372769 // RefSeq // PREDICTED: Homo sapiens similar to Group IIC secretory ph	XM_372769
2	3973313	ENST00000327781 // ENSEMBL Transcript // Homo sapiens similar to ferritin heavy	XR_019653 // Hs.648290 // brain /// XR_017164 // Hs.648290 // brain	chrX	+	34074427	34075618	8	XR_019653 // LOC139431 // similar to ferritin, heavy polypeptide-like 17 // Xp21	0.0682079	3.89688e-13	0.00767485	2.96471e-05	3.65946	3.65946	1.72266	5.38971	4.22084	4.22084	2.25838	6.30019	0.0682079	-0.561381	ENST00000327781 // ENSEMBL Transcript // Homo sapiens similar to ferritin heavy	ENST00000327781
5	3232013	ENST00000381301 // ENSEMBL Transcript // cdna:known chromosome:NCBI36:10:156710	XM_931034 // Hs.568831 // stomach; brain; heart	chr10	+	1558835	1589169	24	XM_931034 // LOC642394 // hypothetical LOC642394 // 10p15.3 // 642394 /// XM_943	0.207799	4.72368e-30	0.00769144	1.12368e-08	5.53523	5.53523	3.38269	8.3284	5.87311	5.87311	3.51902	8.83943	0.207799	-0.337876	ENST00000381301 // ENSEMBL Transcript // cdna:known chromosome:NCBI36:10:156710	ENST00000381301
38	3280224	NM_182543 // RefSeq // Homo sapiens NOL1/NOP2/Sun domain family, member 6 (NSUN6	NM_182543 // Hs.396175 // mouth; prostate; blood; brain; mixed; mammary gland; l	chr10	-	18841551	18988166	236	NM_182543 // NSUN6 // NOL1/NOP2/Sun domain family, member 6 // 10p12.33 // 22107	0.481616	0	0.00770535	0	5.45889	5.45889	1.23456	9.58847	5.72145	5.72145	1.22116	9.78494	0.481616	-0.262556	NM_182543 // RefSeq // Homo sapiens NOL1/NOP2/Sun domain family, member 6 (NSUN6	NM_182543
8	3259785	NM_005479 // RefSeq // Homo sapiens frequently rearranged in advanced T-cell lym	NM_005479 // Hs.126057 // mixed; prostate; colon; pituitary gland; cervix; ovary	chr10	+	99052074	99071662	43	NM_005479 // FRAT1 // frequently rearranged in advanced T-cell lymphomas // 10q2	0.202418	1.64294e-33	0.00772411	3.28051e-13	4.66795	4.66795	1.69334	7.11224	5.10632	5.10632	1.99767	7.83983	0.202418	-0.438374	NM_005479 // RefSeq // Homo sapiens frequently rearranged in advanced T-cell lym	NM_005479
10	2758841	GENSCAN00000026972 // ENSEMBL Prediction // cdna:Genscan chromosome:NCBI36:4:49	BC001829 // Hs.2795 // brain; liver; ascites; uncharacterized tissue; testis; co	chr4	-	4917325	4953799	68	BC001829 // LDHA // lactate dehydrogenase A // 11p15.4 // 3939	0.220531	0	0.00776477	5.04871e-21	5.08826	5.08826	1.23853	7.62481	5.453	5.453	1.71637	8.33492	0.220531	-0.364743	GENSCAN00000026972 // ENSEMBL Prediction // cdna:Genscan chromosome:NCBI36:4:49	GENSCAN00000026972
39	3659306	NM_031490 // RefSeq // Homo sapiens lon peptidase 2, peroxisomal (LONP2), mRNA.	NM_031490 // Hs.651202 // brain; liver; mixed; eye; skin; whole brain; testis; u	chr16	+	46835687	46954394	287	NM_031490 // LONP2 // lon peptidase 2, peroxisomal // 16q12.1 // 83752 /// AK130	0.396778	0	0.00781879	0	6.84813	6.84813	1.11311	10.0847	7.17459	7.17459	0.94292	10.405	0.396778	-0.326461	NM_031490 // RefSeq // Homo sapiens lon peptidase 2, peroxisomal (LONP2), mRNA.	NM_031490
24	3697183	ENST00000388861 // ENSEMBL Transcript // cdna:known chromosome:NCBI36:16:692550	BC024752 // Hs.432387 // brain; eye; lung; uncharacterized tissue; pancreas; mam	chr16	-	69252610	69277435	133	BC024752 // LOC92154 // hypothetical protein BC002770 // 16q22.1 // 92154 /// XM	0.105626	0	0.00782658	0	8.18756	8.18756	3.34933	11.0066	8.7403	8.7403	4.19329	11.6311	0.105626	-0.552739	ENST00000388861 // ENSEMBL Transcript // cdna:known chromosome:NCBI36:16:692550	ENST00000388861
6	2334689	BC093060 // GenBank // Homo sapiens ubiquinol-cytochrome c reductase hinge prote	BC093060 // Hs.481571 // brain; liver; mixed; lung; prostate; skin; lymph node;	chr1	+	46541908	46555024	61	BC093060 // UQCRH // ubiquinol-cytochrome c reductase hinge protein // 1p33 // 7	0.481765	5.35293e-37	0.0078593	2.76904e-14	6.18155	6.18155	3.2659	8.82173	6.42926	6.42926	3.0924	8.87261	0.481765	-0.247704	BC093060 // GenBank // Homo sapiens ubiquinol-cytochrome c reductase hinge prote	BC093060
17	3336197	NM_178864 // RefSeq // Homo sapiens neuronal PAS domain protein 4 (NPAS4), mRNA.	NM_178864 // Hs.256036 // lung; brain; uterus; uncharacterized tissue; cranial n	chr11	+	65944731	65956948	70	NM_178864 // NPAS4 // neuronal PAS domain protein 4 // 11q13 // 266743	0.0649325	0	0.00786176	3.90962e-43	5.09183	5.09183	2.60272	10.3452	5.92335	5.92335	3.03187	10.5734	0.0649325	-0.83152	NM_178864 // RefSeq // Homo sapiens neuronal PAS domain protein 4 (NPAS4), mRNA.	NM_178864
3	4043557	NM_001013355 // RefSeq // Homo sapiens olfactory receptor, family 2, subfamily G	NM_001013355 // Hs.553784 // ---	chr1	+	246751535	246752521	12	NM_001013355 // OR2G6 // olfactory receptor, family 2, subfamily G, member 6 //	0.298156	8.35356e-15	0.0078693	5.38687e-06	3.99328	3.99328	1.62022	6.561	4.46128	4.46128	0.919725	6.93631	0.298156	-0.467998	NM_001013355 // RefSeq // Homo sapiens olfactory receptor, family 2, subfamily G	NM_001013355
10	3378072	NM_033036 // RefSeq // Homo sapiens galactose-3-O-sulfotransferase 3 (GAL3ST3),	NM_033036 // Hs.208343 // uncharacterized tissue; eye; brain; testis; kidney; wh	chr11	-	65565926	65573227	48	NM_033036 // GAL3ST3 // galactose-3-O-sulfotransferase 3 // 11q13 // 89792 /// A	0.105805	0	0.00789819	1.35309e-22	5.86541	5.86541	2.77506	8.16264	6.37098	6.37098	3.06286	8.57191	0.105805	-0.505573	NM_033036 // RefSeq // Homo sapiens galactose-3-O-sulfotransferase 3 (GAL3ST3),	NM_033036
29	2927506	NM_006290 // RefSeq // Homo sapiens tumor necrosis factor, alpha-induced protein	NM_006290 // Hs.591338 // uncharacterized tissue; lung; trachea; lymph node; pla	chr6	+	138226114	138345991	131	NM_006290 // TNFAIP3 // tumor necrosis factor, alpha-induced protein 3 // 6q23 /	0.0910546	0	0.00790195	0	4.15834	4.15834	1.14965	7.94214	4.74794	4.74794	0.969542	8.12395	0.0910546	-0.589608	NM_006290 // RefSeq // Homo sapiens tumor necrosis factor, alpha-induced protein	NM_006290
9	3536650	NM_199421 // RefSeq // Homo sapiens suppressor of cytokine signaling 4 (SOCS4),	NM_199421 // Hs.532610 // lung; whole brain; esophagus; brain; kidney; cervix; u	chr14	+	54563594	54585954	44	NM_199421 // SOCS4 // suppressor of cytokine signaling 4 // 14q22.3 // 122809 //	0.398833	0	0.00790226	1.6301e-22	5.7006	5.7006	2.75958	8.13168	5.99968	5.99968	2.00331	8.75511	0.398833	-0.299082	NM_199421 // RefSeq // Homo sapiens suppressor of cytokine signaling 4 (SOCS4),	NM_199421
20	3907210	NM_003833 // RefSeq // Homo sapiens matrilin 4 (MATN4), transcript variant 1, mR	NM_003833 // Hs.278489 // whole body; skin; connective tissue; uncharacterized t	chr20	-	43349951	43370872	77	NM_003833 // MATN4 // matrilin 4 // 20q13.1-q13.2 // 8785 /// NM_030590 // MATN4	0.159996	0	0.0079402	3.81475e-37	5.20895	5.20895	1.61194	8.126	5.62285	5.62285	2.15437	8.75944	0.159996	-0.413899	NM_003833 // RefSeq // Homo sapiens matrilin 4 (MATN4), transcript variant 1, mR	NM_003833
2	2709120	AB209208 // GenBank // Homo sapiens mRNA for splicing factor, arginine/serine-ri	AB209208 // Hs.533122 // brain; testis; placenta; embryonic tissue; lung; unchar	chr3	-	187135557	187136572	8	AB209208 // SFRS10 // splicing factor, arginine/serine-rich 10 (transformer 2 ho	0.470794	0.00134906	0.00795595	1.41162e-06	6.24934	6.24934	4.45915	7.13582	6.58573	6.58573	4.54521	7.73025	0.470794	-0.336392	AB209208 // GenBank // Homo sapiens mRNA for splicing factor, arginine/serine-ri	AB209208
38	3534128	NM_015091 // RefSeq // Homo sapiens KIAA0423 (KIAA0423), mRNA. // chr14 // 100 /	NM_015091 // Hs.371078 // brain; embryonic tissue; placenta; whole brain; eye; m	chr14	+	44501161	44613382	230	NM_015091 // KIAA0423 // KIAA0423 // 14q21.3 // 23116 /// BC057255 // KIAA0423 /	0.496885	0	0.00796664	0	6.24888	6.24888	1.28163	10.327	6.51487	6.51487	1.41845	10.912	0.496885	-0.265992	NM_015091 // RefSeq // Homo sapiens KIAA0423 (KIAA0423), mRNA. // chr14 // 100 /	NM_015091
37	3517594	NM_014953 // RefSeq // Homo sapiens KIAA1008 (KIAA1008), mRNA. // chr13 // 100 /	NM_014953 // Hs.651138 // testis; brain; placenta; lymph node; kidney; mixed; ov	chr13	-	72226471	72254602	169	NM_014953 // KIAA1008 // KIAA1008 // 13q22.1 // 22894 /// BC038101 // KIAA1008 /	0.419911	0	0.00797424	0	5.72923	5.72923	1.34864	9.85738	6.00558	6.00558	1.83109	10.1748	0.419911	-0.27635	NM_014953 // RefSeq // Homo sapiens KIAA1008 (KIAA1008), mRNA. // chr13 // 100 /	NM_014953
77	2515783	NM_007023 // RefSeq // Homo sapiens Rap guanine nucleotide exchange factor (GEF)	NM_007023 // Hs.470646 // brain; whole brain; larynx; blood; uterus; pancreas; l	chr2	+	173308795	173625857	515	NM_007023 // RAPGEF4 // Rap guanine nucleotide exchange factor (GEF) 4 // 2q31-q	0.430199	0	0.00804029	0	6.67808	6.67808	0.940765	11.9629	6.91955	6.91955	0.777613	12.0977	0.430199	-0.241468	NM_007023 // RefSeq // Homo sapiens Rap guanine nucleotide exchange factor (GEF)	NM_007023
38	3486883	NM_024561 // RefSeq // Homo sapiens NMDA receptor regulated 1-like (NARG1L), tra	NM_024561 // Hs.512914 // brain; testis; mixed; larynx; liver; muscle; uncharact	chr13	+	40783387	40849163	189	NM_024561 // NARG1L // NMDA receptor regulated 1-like // 13q14.11 // 79612 /// N	0.347529	0	0.0080508	0	5.12548	5.12548	0.747535	10.8971	5.45534	5.45534	1.25224	11.0886	0.347529	-0.329853	NM_024561 // RefSeq // Homo sapiens NMDA receptor regulated 1-like (NARG1L), tra	NM_024561
25	3042214	BX648247 // GenBank // Homo sapiens mRNA; cDNA DKFZp686P15108 (from clone DKFZp6	BX648247 // Hs.72068 // whole brain; uterus; testis; brain; muscle; uncharacteri	chr7	-	25599494	25849910	208	BX648247 // LOC646588 // hypothetical protein LOC646588 // 7p15.2 // 646588 ///	0.197355	0	0.00806557	2.99794e-40	3.97085	3.97085	1.29543	6.98091	4.34668	4.34668	1.14456	7.20592	0.197355	-0.375825	BX648247 // GenBank // Homo sapiens mRNA; cDNA DKFZp686P15108 (from clone DKFZp6	BX648247
72	2767378	NM_006095 // RefSeq // Homo sapiens ATPase, aminophospholipid transporter (APLT)	NM_006095 // Hs.435052 // brain; lymph node; uncharacterized tissue; mixed; eye;	chr4	-	42105160	42353857	446	NM_006095 // ATP8A1 // ATPase, aminophospholipid transporter (APLT), Class I, ty	0.429865	0	0.00810851	0	7.14508	7.14508	0.841935	11.6359	7.41841	7.41841	1.00914	12.1792	0.429865	-0.273331	NM_006095 // RefSeq // Homo sapiens ATPase, aminophospholipid transporter (APLT)	NM_006095
12	2473965	NM_017877 // RefSeq // Homo sapiens chromosome 2 open reading frame 18 (C2orf18)	NM_017877 // Hs.516034 // uncharacterized tissue; brain; kidney; embryonic tissu	chr2	+	26840663	26857583	60	NM_017877 // C2orf18 // chromosome 2 open reading frame 18 // 2p23.3 // 54978 //	0.123229	0	0.00811661	9.50213e-34	6.06217	6.06217	1.50795	8.78268	6.67003	6.67003	1.31217	9.13589	0.123229	-0.607857	NM_017877 // RefSeq // Homo sapiens chromosome 2 open reading frame 18 (C2orf18)	NM_017877
11	2778273	NM_014485 // RefSeq // Homo sapiens prostaglandin D2 synthase, hematopoietic (PG	NM_014485 // Hs.128433 // placenta; thymus; prostate; connective tissue; kidney;	chr4	-	95438678	95491013	59	NM_014485 // PGDS // prostaglandin D2 synthase, hematopoietic // 4q22.3 // 27306	0.0911308	2.89163e-30	0.00815116	1.33916e-17	3.99064	3.99064	1.83358	7.10663	4.58625	4.58625	2.2137	7.09207	0.0911308	-0.595608	NM_014485 // RefSeq // Homo sapiens prostaglandin D2 synthase, hematopoietic (PG	NM_014485
18	3824497	NM_018174 // RefSeq // Homo sapiens microtubule-associated protein 1S (MAP1S), m	NM_018174 // Hs.66048 // brain; testis; whole brain; lung; placenta; uncharacter	chr19	+	17691312	17706295	77	NM_018174 // MAP1S // microtubule-associated protein 1S // 19p13.11 // 55201 ///	0.111199	0	0.00817932	0	7.18848	7.18848	3.44461	9.78439	7.77278	7.77278	4.41859	9.93614	0.111199	-0.584299	NM_018174 // RefSeq // Homo sapiens microtubule-associated protein 1S (MAP1S), m	NM_018174
33	3299585	NM_000235 // RefSeq // Homo sapiens lipase A, lysosomal acid, cholesterol estera	NM_000235 // Hs.643030 // brain; uncharacterized tissue; blood; spleen; placenta	chr10	-	90963321	91164352	239	NM_000235 // LIPA // lipase A, lysosomal acid, cholesterol esterase (Wolman dise	0.486242	0	0.00819263	0	6.07277	6.07277	1.77678	10.0129	6.35335	6.35335	2.35522	11.0782	0.486242	-0.28058	NM_000235 // RefSeq // Homo sapiens lipase A, lysosomal acid, cholesterol estera	NM_000235
2	2542340	XM_944401 // RefSeq // PREDICTED: Homo sapiens hypothetical gene supported by AK	XM_944401 // Hs.502854 // eye; brain; mammary gland; lymph node; pituitary gland	chr2	-	19031220	19090197	16	XM_944401 // FLJ41481 // hypothetical gene supported by AK123475 // 2p24.2 // 40	0.0959221	0.536748	0.00822729	0.0112117	3.71222	3.71222	2.35929	5.14573	4.34223	4.34223	3.2402	5.16563	0.0959221	-0.630009	XM_944401 // RefSeq // PREDICTED: Homo sapiens hypothetical gene supported by AK	XM_944401
33	3545564	NM_020421 // RefSeq // Homo sapiens aarF domain containing kinase 1 (ADCK1), mRN	NM_020421 // Hs.413208 // brain; uncharacterized tissue; mammary gland; prostate	chr14	+	77336217	77471108	202	NM_020421 // ADCK1 // aarF domain containing kinase 1 // 14q24.3 // 57143 /// AK	0.112463	0	0.00823396	0	5.24986	5.24986	1.67297	9.717	5.8004	5.8004	2.06566	10.2565	0.112463	-0.550546	NM_020421 // RefSeq // Homo sapiens aarF domain containing kinase 1 (ADCK1), mRN	NM_020421
37	3335952	NM_018026 // RefSeq // Homo sapiens phosphofurin acidic cluster sorting protein	NM_018026 // Hs.591958 // brain; prostate; mammary gland; whole brain; uncharact	chr11	+	65594324	65769014	320	NM_018026 // PACS1 // phosphofurin acidic cluster sorting protein 1 // 11q13.1 /	0.173339	0	0.00824597	0	6.5121	6.5121	1.94301	9.72411	6.98373	6.98373	2.66603	10.0662	0.173339	-0.471629	NM_018026 // RefSeq // Homo sapiens phosphofurin acidic cluster sorting protein	NM_018026
12	3818376	NM_006012 // RefSeq // Homo sapiens ClpP caseinolytic peptidase, ATP-dependent,	NM_006012 // Hs.515092 // lung; brain; mammary gland; skin; uncharacterized tiss	chr19	+	6309309	6319909	59	NM_006012 // CLPP // ClpP caseinolytic peptidase, ATP-dependent, proteolytic sub	0.103531	0	0.00826354	1.81965e-27	6.65815	6.65815	2.17256	10.5816	7.2881	7.2881	3.57683	11.1446	0.103531	-0.629944	NM_006012 // RefSeq // Homo sapiens ClpP caseinolytic peptidase, ATP-dependent,	NM_006012
35	2352106	NM_018704 // RefSeq // Homo sapiens CTTNBP2 N-terminal like (CTTNBP2NL), mRNA. /	NM_018704 // Hs.485899 // brain; mixed; placenta; cochlea; uncharacterized tissu	chr1	+	112703563	112810671	220	NM_018704 // CTTNBP2NL // CTTNBP2 N-terminal like // 1p13.2 // 55917 /// AL35956	0.215283	0	0.0083432	0	5.46593	5.46593	1.62375	10.1047	5.87364	5.87364	1.46586	10.2948	0.215283	-0.407709	NM_018704 // RefSeq // Homo sapiens CTTNBP2 N-terminal like (CTTNBP2NL), mRNA. /	NM_018704
3	3475782	NM_177551 // RefSeq // Homo sapiens G protein-coupled receptor 109A (GPR109A), m	NM_177551 // Hs.524812 // lung; larynx; blood; spleen; eye; uterus; placenta; mi	chr12	-	121746716	121753848	32	NM_177551 // GPR109A // G protein-coupled receptor 109A // 12q24.31 // 338442 //	0.0759043	1.55788e-11	0.00836599	0.00783976	4.72349	4.72349	3.43666	5.8863	5.15463	5.15463	3.1179	6.99435	0.0759043	-0.431138	NM_177551 // RefSeq // Homo sapiens G protein-coupled receptor 109A (GPR109A), m	NM_177551
14	3715642	NM_003593 // RefSeq // Homo sapiens forkhead box N1 (FOXN1), mRNA. // chr17 // 1	NM_003593 // Hs.58611 // mouth; heart; uncharacterized tissue; mixed; thymus; la	chr17	+	23857535	23889302	67	NM_003593 // FOXN1 // forkhead box N1 // 17q11-q12 // 8456	0.107321	0	0.00838141	3.09313e-19	4.71308	4.71308	0.99251	9.88926	5.19639	5.19639	1.45239	10.2116	0.107321	-0.483311	NM_003593 // RefSeq // Homo sapiens forkhead box N1 (FOXN1), mRNA. // chr17 // 1	NM_003593
12	2424148	NM_144988 // RefSeq // Homo sapiens asparagine-linked glycosylation 14 homolog (	NM_144988 // Hs.408927 // connective tissue; brain; lung; mammary gland; parathy	chr1	-	95220887	95311114	97	NM_144988 // ALG14 // asparagine-linked glycosylation 14 homolog (yeast) // 1p21	0.166444	0	0.00841774	1.13317e-19	5.64939	5.64939	1.15263	8.69973	6.11404	6.11404	1.70427	9.35887	0.166444	-0.464649	NM_144988 // RefSeq // Homo sapiens asparagine-linked glycosylation 14 homolog (	NM_144988
23	4001369	NM_006089 // RefSeq // Homo sapiens sex comb on midleg-like 2 (Drosophila) (SCML	NM_006089 // Hs.495774 // testis; whole brain; thyroid; colon; brain; mouth; emb	chrX	-	18167358	18282755	147	NM_006089 // SCML2 // sex comb on midleg-like 2 (Drosophila) // Xp22 // 10389 //	0.15877	0	0.00844621	3.09266e-31	4.00359	4.00359	0.979089	10.6215	4.3909	4.3909	1.10032	11.0893	0.15877	-0.387311	NM_006089 // RefSeq // Homo sapiens sex comb on midleg-like 2 (Drosophila) (SCML	NM_006089
20	2323603	NM_017765 // RefSeq // Homo sapiens PQ loop repeat containing 2 (PQLC2), transcr	NM_017765 // Hs.647620 // brain; testis; uncharacterized tissue; placenta; lung;	chr1	+	19511374	19537933	107	NM_017765 // PQLC2 // PQ loop repeat containing 2 // 1p36.13 // 54896 /// NM_001	0.160641	0	0.00845441	0	5.92641	5.92641	2.70412	9.68306	6.39277	6.39277	2.78426	9.73799	0.160641	-0.466363	NM_017765 // RefSeq // Homo sapiens PQ loop repeat containing 2 (PQLC2), transcr	NM_017765
9	3872873	ENST00000282333 // ENSEMBL Transcript // hypothetical protein BC012365 (LOC11641	XM_938741 // Hs.222236 // eye; uncharacterized tissue; adrenal gland; colon; ute	chr19	-	63570812	63584361	61	XM_938741 // LOC116412 // hypothetical protein BC012365 // 19q13.43 // 116412 //	0.129662	0	0.00850604	6.31217e-18	5.66969	5.66969	2.22857	8.59579	6.15903	6.15903	2.26122	9.00015	0.129662	-0.489336	ENST00000282333 // ENSEMBL Transcript // hypothetical protein BC012365 (LOC11641	ENST00000282333
9	2922756	NM_015952 // RefSeq // Homo sapiens RWD domain containing 1 (RWDD1), transcript	NM_015952 // Hs.532164 // adipose tissue; placenta; vascular; embryonic tissue;	chr6	+	116999255	117025588	59	NM_015952 // RWDD1 // RWD domain containing 1 // 6q13-q22.33 // 51389 /// NM_016	0.589181	0	0.00851224	1.47108e-17	6.45789	6.45789	1.27649	8.67197	6.65115	6.65115	1.79969	9.21249	0.589181	-0.193259	NM_015952 // RefSeq // Homo sapiens RWD domain containing 1 (RWDD1), transcript	NM_015952
8	3489335	NM_001507 // RefSeq // Homo sapiens motilin receptor (MLNR), mRNA. // chr13 // 1	NM_001507 // Hs.248126 // uncharacterized tissue; ovary	chr13	+	48692475	48694514	32	NM_001507 // MLNR // motilin receptor // 13q14-q21 // 2862	0.185291	0	0.00853347	2.29972e-13	4.93338	4.93338	1.95038	8.43276	5.31603	5.31603	2.32666	9.01023	0.185291	-0.38265	NM_001507 // RefSeq // Homo sapiens motilin receptor (MLNR), mRNA. // chr13 // 1	NM_001507
3	2412257	ENST00000389648 // ENSEMBL Transcript // cdna:known chromosome:NCBI36:11:653792	XR_019517 // Hs.647668 // --- /// XR_017560 // Hs.647668 // ---	chr1	-	51396235	51396731	14	XR_019517 // LOC391039 // similar to Cofilin-1 (Cofilin, non-muscle isoform) (18	0.412669	1.28249e-23	0.00860801	1.50512e-08	7.49739	7.49739	5.51133	10.8069	7.80675	7.80675	4.92505	11.5677	0.412669	-0.309354	ENST00000389648 // ENSEMBL Transcript // cdna:known chromosome:NCBI36:11:653792	ENST00000389648
20	3858537	BC033328 // GenBank // Homo sapiens cDNA clone IMAGE:4827119. // chr19 // 90 //	NM_001037330 // Hs.164324 // lung; brain; liver; pancreas; kidney; mixed; cervix	chr19	-	37170315	37362114	139	NM_001037330 // TRIM16L // tripartite motif-containing 16-like // 17p11.2 // 147	0.0369903	0	0.00860864	4.4729e-28	4.22066	4.22066	1.06395	8.06862	4.75673	4.75673	1.43111	8.31806	0.0369903	-0.53607	BC033328 // GenBank // Homo sapiens cDNA clone IMAGE:4827119. // chr19 // 90 //	BC033328
10	2447148	NM_002928 // RefSeq // Homo sapiens regulator of G-protein signalling 16 (RGS16)	NM_002928 // Hs.413297 // brain; lung; kidney; thyroid; uncharacterized tissue;	chr1	-	180834393	180840660	56	NM_002928 // RGS16 // regulator of G-protein signalling 16 // 1q25-q31 // 6004	0.144022	0	0.008614	9.75107e-23	5.3695	5.3695	2.54767	9.13609	5.91136	5.91136	2.72358	9.91788	0.144022	-0.541863	NM_002928 // RefSeq // Homo sapiens regulator of G-protein signalling 16 (RGS16)	NM_002928
18	3872945	NM_012254 // RefSeq // Homo sapiens solute carrier family 27 (fatty acid transpo	NM_012254 // Hs.292177 // liver; brain; uncharacterized tissue; blood; embryonic	chr19	-	63682701	63715234	89	NM_012254 // SLC27A5 // solute carrier family 27 (fatty acid transporter), membe	0.153681	0	0.00865664	1.51081e-29	5.41673	5.41673	2.06687	8.69425	5.83731	5.83731	1.53603	9.18392	0.153681	-0.420578	NM_012254 // RefSeq // Homo sapiens solute carrier family 27 (fatty acid transpo	NM_012254
24	3894098	BC051762 // GenBank // Homo sapiens chromosome 20 open reading frame 96, mRNA (c	BC051762 // Hs.348112 // whole brain; testis; adrenal gland; brain; heart; blood	chr20	-	193996	223582	111	BC051762 // C20orf96 // chromosome 20 open reading frame 96 // 20p13 // 140680 /	0.248768	0	0.00876531	0	5.07524	5.07524	2.15215	8.53763	5.46074	5.46074	1.16916	9.10649	0.248768	-0.385504	BC051762 // GenBank // Homo sapiens chromosome 20 open reading frame 96, mRNA (c	BC051762
13	3842141	NM_000991 // RefSeq // Homo sapiens ribosomal protein L28 (RPL28), mRNA. // chr1	NM_000991 // Hs.356371 // embryonic tissue; brain; mixed; colon; pancreas; ovary	chr19	+	60587626	60606502	79	NM_000991 // RPL28 // ribosomal protein L28 // 19q13.4 // 6158 /// BC010182 // R	0.140769	0	0.00880457	4.17735e-23	5.90568	5.90568	1.54609	12.3283	6.39072	6.39072	2.41902	12.8226	0.140769	-0.485035	NM_000991 // RefSeq // Homo sapiens ribosomal protein L28 (RPL28), mRNA. // chr1	NM_000991
24	3391769	NM_004724 // RefSeq // Homo sapiens ZW10, kinetochore associated, homolog (Droso	NM_004724 // Hs.503886 // testis; brain; embryonic tissue; lung; colon; thyroid;	chr11	-	113109146	113149683	127	NM_004724 // ZW10 // ZW10, kinetochore associated, homolog (Drosophila) // 11q23	0.375826	0	0.00882901	0	5.6449	5.6449	1.1967	8.27067	5.95294	5.95294	1.2128	8.53784	0.375826	-0.308039	NM_004724 // RefSeq // Homo sapiens ZW10, kinetochore associated, homolog (Droso	NM_004724
7	3753956	NM_004590 // RefSeq // Homo sapiens chemokine (C-C motif) ligand 16 (CCL16), mRN	NM_004590 // Hs.10458 // liver; nerve /// BC099664 // Hs.10458 // liver; nerve /	chr17	-	31327648	31332645	36	NM_004590 // CCL16 // chemokine (C-C motif) ligand 16 // 17q11.2 // 6360 /// BC0	0.2249	1.49696e-16	0.00883035	3.93604e-07	3.72886	3.72886	1.92426	5.41572	4.05447	4.05447	1.17549	6.63392	0.2249	-0.325612	NM_004590 // RefSeq // Homo sapiens chemokine (C-C motif) ligand 16 (CCL16), mRN	NM_004590
5	2451544	NM_002479 // RefSeq // Homo sapiens myogenin (myogenic factor 4) (MYOG), mRNA. /	NM_002479 // Hs.2830 // muscle; mixed; placenta; nerve; eye	chr1	-	201318880	201321787	15	NM_002479 // MYOG // myogenin (myogenic factor 4) // 1q31-q41 // 4656	0.226993	3.30481e-30	0.00883854	1.91841e-11	6.15805	6.15805	3.16575	9.22385	6.57591	6.57591	4.13825	9.65928	0.226993	-0.417863	NM_002479 // RefSeq // Homo sapiens myogenin (myogenic factor 4) (MYOG), mRNA. /	NM_002479
22	3636522	NM_016073 // RefSeq // Homo sapiens hepatoma-derived growth factor, related prot	NM_016073 // Hs.513954 // lung; mixed; brain; spleen; thymus; bladder; prostate;	chr15	-	81593300	81667774	127	NM_016073 // HDGFRP3 // hepatoma-derived growth factor, related protein 3 // 15q	0.308434	0	0.00885798	0	6.86032	6.86032	1.07383	12.6559	7.21529	7.21529	1.19356	12.9171	0.308434	-0.354961	NM_016073 // RefSeq // Homo sapiens hepatoma-derived growth factor, related prot	NM_016073
11	3599873	BC029061 // GenBank // Homo sapiens cDNA clone IMAGE:5189446. // chr15 // 100 //	BC029061 // Hs.410126 // lung; kidney; testis; brain; mixed; uncharacterized tis	chr15	+	67547449	67650961	76	BC029061 // LOC145837 // hypothetical protein LOC145837 // 15q23 // 145837 /// B	0.239081	0	0.00887042	2.86631e-20	4.62207	4.62207	1.79034	7.78177	4.98847	4.98847	1.67829	8.33222	0.239081	-0.366401	BC029061 // GenBank // Homo sapiens cDNA clone IMAGE:5189446. // chr15 // 100 //	BC029061
16	3408966	NM_015633 // RefSeq // Homo sapiens FGFR1 oncogene partner 2 (FGFR1OP2), mRNA. /	NM_015633 // Hs.591162 // brain; prostate; mammary gland; adrenal gland; pancrea	chr12	+	26982034	27010844	87	NM_015633 // FGFR1OP2 // FGFR1 oncogene partner 2 // 12p11.23 // 26127 /// BC032	0.351386	0	0.008871	3.4287e-40	6.86849	6.86849	1.51403	12.9018	7.17968	7.17968	2.02354	13.246	0.351386	-0.311194	NM_015633 // RefSeq // Homo sapiens FGFR1 oncogene partner 2 (FGFR1OP2), mRNA. /	NM_015633
25	3697315	BC043273 // GenBank // Homo sapiens hydrocephalus inducing homolog (mouse), mRNA	BC043273 // Hs.47115 // mixed; brain; testis; uterus; lung; connective tissue; u	chr16	-	69398790	69457733	108	BC043273 // HYDIN // hydrocephalus inducing homolog (mouse) // 16q22.2-q22.3 //	0.605367	0	0.00889566	0	5.87184	5.87184	1.86733	8.47557	6.04475	6.04475	2.16929	8.74706	0.605367	-0.172907	BC043273 // GenBank // Homo sapiens hydrocephalus inducing homolog (mouse), mRNA	BC043273
18	3504617	NM_145061 // RefSeq // Homo sapiens chromosome 13 open reading frame 3 (C13orf3)	NM_145061 // Hs.88523 // uncharacterized tissue; brain; kidney; skin; stomach; p	chr13	-	20625734	20648839	86	NM_145061 // C13orf3 // chromosome 13 open reading frame 3 // 13q12.11 // 221150	0.261878	0	0.00892967	7.58619e-26	3.3788	3.3788	0.852494	7.23201	3.65597	3.65597	1.27898	8.50614	0.261878	-0.277168	NM_145061 // RefSeq // Homo sapiens chromosome 13 open reading frame 3 (C13orf3)	NM_145061
3	3978071	NM_130775 // RefSeq // Homo sapiens X antigen family, member 5 (XAGE5), mRNA. //	NM_130775 // Hs.356874 // testis /// BC103964 // Hs.356874 // testis /// BC10396	chrX	+	52857953	52864052	27	NM_130775 // XAGE5 // X antigen family, member 5 // Xp11.22 // 170627 /// BC1039	0.12357	4.5844e-10	0.00894619	0.00198302	2.17447	2.17447	1.36544	3.31667	2.48728	2.48728	1.14391	3.9048	0.12357	-0.31281	NM_130775 // RefSeq // Homo sapiens X antigen family, member 5 (XAGE5), mRNA. //	NM_130775
9	3288482	NM_001006939 // RefSeq // Homo sapiens leucine rich repeat containing 18 (LRRC18	NM_001006939 // Hs.202438 // mixed; testis; cervix; connective tissue; brain ///	chr10	-	49762012	49817947	44	NM_001006939 // LRRC18 // leucine rich repeat containing 18 // 10q11.22 // 47435	0.0510247	2.94569e-25	0.00896984	5.6882e-09	3.11408	3.11408	1.3107	5.89068	3.70116	3.70116	1.27934	6.81452	0.0510247	-0.587083	NM_001006939 // RefSeq // Homo sapiens leucine rich repeat containing 18 (LRRC18	NM_001006939
7	3846065	NM_021217 // RefSeq // Homo sapiens zinc finger protein 77 (ZNF77), mRNA. // chr	NM_021217 // Hs.38004 // spleen; ovary; embryonic tissue; testis; lung; prostate	chr19	-	2884224	2895928	29	NM_021217 // ZNF77 // zinc finger protein 77 // 19p13.3 // 58492	0.0607788	5.78043e-38	0.00899708	6.27816e-08	5.16237	5.16237	1.96947	8.9762	5.77738	5.77738	1.86991	9.41504	0.0607788	-0.615	NM_021217 // RefSeq // Homo sapiens zinc finger protein 77 (ZNF77), mRNA. // chr	NM_021217
54	2895841	NM_004233 // RefSeq // Homo sapiens CD83 molecule (CD83), transcript variant 1,	NM_004233 // Hs.484703 // blood; lung; brain; lymph node; uncharacterized tissue	chr6	+	14118209	14485106	386	NM_004233 // CD83 // CD83 molecule // 6p23 // 9308 /// NM_001040280 // CD83 // C	0.127299	0	0.00900236	0	4.97446	4.97446	1.06743	9.61548	5.41684	5.41684	1.17306	10.443	0.127299	-0.442385	NM_004233 // RefSeq // Homo sapiens CD83 molecule (CD83), transcript variant 1,	NM_004233
2	2846561	NM_014362 // RefSeq // Homo sapiens 3-hydroxyisobutyryl-Coenzyme A hydrolase (HI	NM_014362 // Hs.128598 // brain; kidney; testis; mixed; uncharacterized tissue;	chr5	-	2840402	2841640	18	NM_014362 // HIBCH // 3-hydroxyisobutyryl-Coenzyme A hydrolase // 2q32.2 // 2627	0.0382044	1.8966e-09	0.00902866	0.000122266	3.32389	3.32389	2.03849	4.58051	4.05334	4.05334	2.26519	6.11704	0.0382044	-0.729445	NM_014362 // RefSeq // Homo sapiens 3-hydroxyisobutyryl-Coenzyme A hydrolase (HI	NM_014362
25	3677913	NM_001116 // RefSeq // Homo sapiens adenylate cyclase 9 (ADCY9), mRNA. // chr16	NM_001116 // Hs.391860 // mixed; mammary gland; lung; brain; nerve; uncharacteri	chr16	-	3943409	4106187	165	NM_001116 // ADCY9 // adenylate cyclase 9 // 16p13.3 // 115	0.283498	0	0.00903252	0	5.86563	5.86563	1.37646	8.90329	6.21078	6.21078	1.21877	9.16545	0.283498	-0.345148	NM_001116 // RefSeq // Homo sapiens adenylate cyclase 9 (ADCY9), mRNA. // chr16	NM_001116
28	3728889	NM_004859 // RefSeq // Homo sapiens clathrin, heavy chain (Hc) (CLTC), mRNA. //	NM_004859 // Hs.491351 // brain; testis; embryonic tissue; lung; skin; liver; pl	chr17	+	54538678	55274378	275	NM_004859 // CLTC // clathrin, heavy chain (Hc) // 17q11-qter // 1213 /// NM_030	0.275586	0	0.00910963	0	6.43907	6.43907	1.68887	11.6429	6.86202	6.86202	1.88814	11.9893	0.275586	-0.422949	NM_004859 // RefSeq // Homo sapiens clathrin, heavy chain (Hc) (CLTC), mRNA. //	NM_004859
14	3318615	NM_001037329 // RefSeq // Homo sapiens cyclic nucleotide gated channel alpha 4 (	NM_001037329 // Hs.434618 // lung; colon; mixed; trachea; liver; ovary; brain; s	chr11	+	6211522	6223715	65	NM_001037329 // CNGA4 // cyclic nucleotide gated channel alpha 4 // 11p15.4 // 1	0.285293	1.10478e-41	0.00912391	1.29364e-24	4.73591	4.73591	2.41779	6.5362	5.04743	5.04743	2.70637	7.23827	0.285293	-0.311526	NM_001037329 // RefSeq // Homo sapiens cyclic nucleotide gated channel alpha 4 (	NM_001037329
89	2583014	NM_013450 // RefSeq // Homo sapiens bromodomain adjacent to zinc finger domain,	NM_013450 // Hs.470369 // brain; testis; uncharacterized tissue; embryonic tissu	chr2	-	159880072	160277315	369	NM_013450 // BAZ2B // bromodomain adjacent to zinc finger domain, 2B // 2q23-q24	0.475667	0	0.00913692	0	6.13323	6.13323	0.928793	10.0219	6.38118	6.38118	0.957821	10.2639	0.475667	-0.247954	NM_013450 // RefSeq // Homo sapiens bromodomain adjacent to zinc finger domain,	NM_013450
55	3541497	NM_133509 // RefSeq // Homo sapiens RAD51-like 1 (S. cerevisiae) (RAD51L1), tran	NM_133509 // Hs.172587 // uncharacterized tissue; mixed; mammary gland; stomach;	chr14	+	67355717	68266688	505	NM_133509 // RAD51L1 // RAD51-like 1 (S. cerevisiae) // 14q23-q24.2 // 5890 ///	0.159885	0	0.00914297	0	3.83106	3.83106	1.15516	6.92564	4.21263	4.21263	1.04883	7.71355	0.159885	-0.381566	NM_133509 // RefSeq // Homo sapiens RAD51-like 1 (S. cerevisiae) (RAD51L1), tran	NM_133509
17	4016955	NM_031274 // RefSeq // Homo sapiens testis expressed sequence 13A (TEX13A), mRNA	NM_031274 // Hs.567543 // uncharacterized tissue; brain; mixed	chrX	-	104302684	104352268	77	NM_031274 // TEX13A // testis expressed sequence 13A // Xq22.3 // 56157	0.34407	0	0.00916074	3.315e-22	3.95535	3.95535	1.26606	7.04369	4.25431	4.25431	0.714908	8.28907	0.34407	-0.298964	NM_031274 // RefSeq // Homo sapiens testis expressed sequence 13A (TEX13A), mRNA	NM_031274
5	2519020	BC121088 // GenBank // Homo sapiens fibrous sheath interacting protein 2, mRNA (	BC121088 // Hs.376600 // whole body; embryonic tissue; mammary gland; testis; he	chr2	+	186311600	186312220	18	BC121088 // FSIP2 // fibrous sheath interacting protein 2 // 2q32.1 // 285135 //	0.0583963	8.79442e-18	0.00916114	7.79498e-08	5.77656	5.77656	1.95945	7.5003	6.45716	6.45716	3.58522	8.13262	0.0583963	-0.680603	BC121088 // GenBank // Homo sapiens fibrous sheath interacting protein 2, mRNA (	BC121088
55	3768015	NM_014877 // RefSeq // Homo sapiens helicase with zinc finger (HELZ), mRNA. // c	NM_014877 // Hs.569824 // whole brain; brain; testis; spleen; mixed; kidney ///	chr17	-	62485987	62672547	293	NM_014877 // HELZ // helicase with zinc finger // 17q24.2 // 9931 /// BC056895 /	0.360795	0	0.00918004	0	6.48363	6.48363	1.38469	9.629	6.82284	6.82284	1.16511	10.1364	0.360795	-0.339213	NM_014877 // RefSeq // Homo sapiens helicase with zinc finger (HELZ), mRNA. // c	NM_014877
13	3837866	NM_004605 // RefSeq // Homo sapiens sulfotransferase family, cytosolic, 2B, memb	NM_004605 // Hs.369331 // prostate; placenta; mouth; lung; uterus; testis; mixed	chr19	+	53747164	53799021	65	NM_004605 // SULT2B1 // sulfotransferase family, cytosolic, 2B, member 1 // 19q1	0.097994	0	0.00918321	2.13758e-20	5.06608	5.06608	1.91364	7.85129	5.54692	5.54692	2.86184	7.9914	0.097994	-0.480843	NM_004605 // RefSeq // Homo sapiens sulfotransferase family, cytosolic, 2B, memb	NM_004605
87	2678714	ENST00000341848 // ENSEMBL Transcript // fragile histidine triad gene (FHIT), mR	XR_018394 // Hs.647216 // --- /// XR_016783 // Hs.647442 // mammary gland /// XR	chr3	-	59567569	61212643	1061	XR_018394 // LOC440063 // similar to peptidylprolyl isomerase A isoform 1 // 11q	0.168411	0	0.00919319	0	4.15842	4.15842	1.34311	9.14696	4.54032	4.54032	1.3235	9.53135	0.168411	-0.381901	ENST00000341848 // ENSEMBL Transcript // fragile histidine triad gene (FHIT), mR	ENST00000341848
59	2488785	NM_015120 // RefSeq // Homo sapiens Alstrom syndrome 1 (ALMS1), mRNA. // chr2 //	NM_015120 // Hs.184720 // testis; mixed; uncharacterized tissue; brain; embryoni	chr2	+	73461109	73710529	408	NM_015120 // ALMS1 // Alstrom syndrome 1 // 2p13 // 7840 /// BC035025 // ALMS1 /	0.673909	0	0.00919355	0	5.72629	5.72629	1.18687	9.5288	5.85577	5.85577	1.16161	9.59141	0.673909	-0.129474	NM_015120 // RefSeq // Homo sapiens Alstrom syndrome 1 (ALMS1), mRNA. // chr2 //	NM_015120
17	3631498	NM_018357 // RefSeq // Homo sapiens La ribonucleoprotein domain family, member 6	NM_018357 // Hs.416755 // brain; whole brain; eye; cranial nerve; liver; mixed;	chr15	-	68910270	68933577	73	NM_018357 // LARP6 // La ribonucleoprotein domain family, member 6 // 15q23 // 5	0.118812	0	0.0092178	0	7.52466	7.52466	2.72703	10.2553	8.10219	8.10219	2.64558	11.1547	0.118812	-0.577529	NM_018357 // RefSeq // Homo sapiens La ribonucleoprotein domain family, member 6	NM_018357
15	3630180	NM_000968 // RefSeq // Homo sapiens ribosomal protein L4 (RPL4), mRNA. // chr15	NM_000968 // Hs.186350 // brain; prostate; colon; lung; uterus; uncharacterized	chr15	-	64577407	64603924	147	NM_000968 // RPL4 // ribosomal protein L4 // 15q22 // 6124 /// NR_002440 // SNOR	0.357346	0	0.00922522	3.18225e-28	4.12787	4.12787	1.25295	7.75285	4.4722	4.4722	1.31391	7.9837	0.357346	-0.344329	NM_000968 // RefSeq // Homo sapiens ribosomal protein L4 (RPL4), mRNA. // chr15	NM_000968
7	2909483	NM_153839 // RefSeq // Homo sapiens G protein-coupled receptor 111 (GPR111), mRN	NM_153839 // Hs.645172 // brain /// DQ315369 // Hs.645172 // brain /// AK126683	chr6	+	47732133	47758381	60	NM_153839 // GPR111 // G protein-coupled receptor 111 // 6p12.3 // 222611 /// DQ	0.28606	3.84323e-33	0.00929517	1.23712e-13	4.16988	4.16988	2.25139	7.27424	4.51935	4.51935	1.98703	7.31342	0.28606	-0.349468	NM_153839 // RefSeq // Homo sapiens G protein-coupled receptor 111 (GPR111), mRN	NM_153839
39	2988336	NM_014855 // RefSeq // Homo sapiens KIAA0415 protein (KIAA0415), mRNA. // chr7 /	NM_014855 // Hs.558440 // brain; uncharacterized tissue; lung; placenta; eye; wh	chr7	+	4781523	4805142	192	NM_014855 // KIAA0415 // KIAA0415 protein // 7p22.2 // 9907 /// BC037399 // KIAA	0.128499	0	0.00930023	0	6.02217	6.02217	2.73538	9.79635	6.54514	6.54514	1.29335	9.69842	0.128499	-0.522966	NM_014855 // RefSeq // Homo sapiens KIAA0415 protein (KIAA0415), mRNA. // chr7 /	NM_014855
6	2839065	ENST00000320147 // ENSEMBL Transcript // cdna:novel chromosome:NCBI36:5:1657418	XM_001131161 // Hs.535896 // brain; mixed; uncharacterized tissue; thymus; colon	chr5	+	165677299	165749419	48	XM_001131161 // HEATR2 // HEAT repeat containing 2 // 7p22.3 // 54919	0.544883	6.83848e-27	0.00930068	1.98541e-10	3.94404	3.94404	1.84563	6.73762	4.1354	4.1354	1.62945	6.96283	0.544883	-0.191368	ENST00000320147 // ENSEMBL Transcript // cdna:novel chromosome:NCBI36:5:1657418	ENST00000320147
20	2391647	NM_014188 // RefSeq // Homo sapiens SSU72 RNA polymerase II CTD phosphatase homo	NM_014188 // Hs.30026 // brain; lung; mixed; colon; prostate; uncharacterized ti	chr1	-	1466918	1500115	92	NM_014188 // SSU72 // SSU72 RNA polymerase II CTD phosphatase homolog (S. cerevi	0.24867	0	0.00931482	0	7.09395	7.09395	3.58923	10.4653	7.44484	7.44484	3.9216	10.6361	0.24867	-0.350895	NM_014188 // RefSeq // Homo sapiens SSU72 RNA polymerase II CTD phosphatase homo	NM_014188
2	2696778	CR936826 // GenBank // Homo sapiens mRNA; cDNA DKFZp686K21248 (from clone DKFZp6	CR936826 // Hs.124047 // testis; lung; placenta; uncharacterized tissue; muscle;	chr3	-	137380538	137382921	16	CR936826 // DKFZp779O175 // hypothetical protein DKFZp779O175 // 19q13.12 // 374	0.55914	1.47961e-05	0.00931827	0.0023332	2.79442	2.79442	1.08971	4.10114	3.00519	3.00519	1.34112	4.13308	0.55914	-0.210767	CR936826 // GenBank // Homo sapiens mRNA; cDNA DKFZp686K21248 (from clone DKFZp6	CR936826
26	3721452	NM_021939 // RefSeq // Homo sapiens FK506 binding protein 10, 65 kDa (FKBP10), m	NM_021939 // Hs.463035 // brain; skin; kidney; connective tissue; placenta; unch	chr17	+	37222498	37232949	122	NM_021939 // FKBP10 // FK506 binding protein 10, 65 kDa // 17q21.2 // 60681 ///	0.10387	0	0.00935629	0	5.75117	5.75117	3.24885	8.16555	6.28806	6.28806	3.42076	8.72157	0.10387	-0.536891	NM_021939 // RefSeq // Homo sapiens FK506 binding protein 10, 65 kDa (FKBP10), m	NM_021939
8	3743842	NM_006942 // RefSeq // Homo sapiens SRY (sex determining region Y)-box 15 (SOX15	NM_006942 // Hs.95582 // brain; embryonic tissue; mouth; skin; eye; pituitary gl	chr17	-	7431551	7434435	36	NM_006942 // SOX15 // SRY (sex determining region Y)-box 15 // 17p13 // 6665 ///	0.228462	3.29665e-34	0.00937061	5.04092e-15	5.43386	5.43386	2.39911	7.05827	5.81593	5.81593	3.21273	7.72605	0.228462	-0.382078	NM_006942 // RefSeq // Homo sapiens SRY (sex determining region Y)-box 15 (SOX15	NM_006942
12	3864680	NM_182573 // RefSeq // Homo sapiens LY6/PLAUR domain containing 5 (LYPD5), mRNA.	NM_182573 // Hs.44289 // brain; placenta; mixed; whole brain; uncharacterized ti	chr19	-	48981822	49016616	67	NM_182573 // LYPD5 // LY6/PLAUR domain containing 5 // 19q13.31 // 284348 /// NM	0.186656	0	0.00938324	8.52142e-31	6.08691	6.08691	2.72503	8.87987	6.57371	6.57371	3.26671	9.335	0.186656	-0.486804	NM_182573 // RefSeq // Homo sapiens LY6/PLAUR domain containing 5 (LYPD5), mRNA.	NM_182573
17	3997825	NM_015419 // RefSeq // Homo sapiens matrix-remodelling associated 5 (MXRA5), mRN	NM_015419 // Hs.369422 // uncharacterized tissue; mammary gland; mixed; pancreas	chrX	-	3064267	3274681	190	NM_015419 // MXRA5 // matrix-remodelling associated 5 // Xp22.33 // 25878 /// BC	0.0736111	0	0.00941153	1.26101e-26	4.37831	4.37831	1.4796	9.01935	4.88634	4.88634	2.55386	9.38842	0.0736111	-0.508031	NM_015419 // RefSeq // Homo sapiens matrix-remodelling associated 5 (MXRA5), mRN	NM_015419
21	4031258	ENST00000303979 // ENSEMBL Transcript // cdna:novel chromosome:NCBI36:Y:2203955	NM_003308 // Hs.571766 // brain; testis; mixed /// NM_003308 // Hs.592352 // ---	chrY	+	21976674	22065062	149	NM_001006117 // RBMY1J // RNA binding motif protein, Y-linked, family 1, member	0.143213	0	0.00942031	2.1864e-28	4.32804	4.32804	1.15499	7.02159	4.7714	4.7714	1.59845	7.66511	0.143213	-0.443368	ENST00000303979 // ENSEMBL Transcript // cdna:novel chromosome:NCBI36:Y:2203955	ENST00000303979
18	2936657	NM_031409 // RefSeq // Homo sapiens chemokine (C-C motif) receptor 6 (CCR6), tra	NM_031409 // Hs.46468 // spleen; mixed; uncharacterized tissue; blood; pharynx;	chr6	+	167445305	167473174	70	NM_031409 // CCR6 // chemokine (C-C motif) receptor 6 // 6q27 // 1235 /// NM_004	0.276851	0	0.00946123	1.88361e-28	4.04201	4.04201	1.54686	6.6813	4.34217	4.34217	1.79793	7.38653	0.276851	-0.300162	NM_031409 // RefSeq // Homo sapiens chemokine (C-C motif) receptor 6 (CCR6), tra	NM_031409
24	3202316	NM_024761 // RefSeq // Homo sapiens MOB1, Mps One Binder kinase activator-like 2	NM_024761 // Hs.651275 // brain; placenta; cranial nerve; stomach; embryonic tis	chr9	-	27315208	27519810	248	NM_024761 // MOBKL2B // MOB1, Mps One Binder kinase activator-like 2B (yeast) //	0.164125	0	0.0094743	0	5.04731	5.04731	1.41772	8.84485	5.58306	5.58306	1.56305	10.214	0.164125	-0.535751	NM_024761 // RefSeq // Homo sapiens MOB1, Mps One Binder kinase activator-like 2	NM_024761
10	3868506	NM_138334 // RefSeq // Homo sapiens Josephin domain containing 2 (JOSD2), mRNA.	NM_138334 // Hs.467151 // uncharacterized tissue; prostate; kidney; embryonic ti	chr19	-	55701071	55706381	40	NM_138334 // JOSD2 // Josephin domain containing 2 // 19q13.33 // 126119 /// AK1	0.135422	1.70053e-39	0.00947735	4.68768e-29	6.25692	6.25692	4.32042	8.07792	6.73237	6.73237	4.25649	8.85244	0.135422	-0.47544	NM_138334 // RefSeq // Homo sapiens Josephin domain containing 2 (JOSD2), mRNA.	NM_138334
21	3673684	NM_030928 // RefSeq // Homo sapiens chromatin licensing and DNA replication fact	NM_030928 // Hs.122908 // uncharacterized tissue; bone; adrenal gland; bladder;	chr16	+	87373599	87403163	87	NM_030928 // CDT1 // chromatin licensing and DNA replication factor 1 // 16q24.3	0.119192	0	0.00948346	3.64338e-44	5.90934	5.90934	1.38469	8.24543	6.37297	6.37297	1.11664	8.98397	0.119192	-0.463631	NM_030928 // RefSeq // Homo sapiens chromatin licensing and DNA replication fact	NM_030928
2	3475873	CR625609 // GenBank // full-length cDNA clone CS0DJ006YG01 of T cells (Jurkat ce	CR625609 // Hs.502823 // brain; lung; eye; pancreas; liver; placenta; prostate;	chr12	-	121928591	121931110	12	CR625609 // PRDX5 // peroxiredoxin 5 // 11q13 // 25824	0.387984	2.81306e-14	0.00955449	1.2917e-07	4.52757	4.52757	2.36883	6.77169	4.95701	4.95701	1.84086	7.79391	0.387984	-0.429446	CR625609 // GenBank // full-length cDNA clone CS0DJ006YG01 of T cells (Jurkat ce	CR625609
353	3581637	NM_001012 // RefSeq // Homo sapiens ribosomal protein S8 (RPS8), mRNA. // chr14	NM_001012 // Hs.512675 // embryonic tissue; pancreas; liver; prostate; brain; un	chr14	-	105120712	106352439	3471	NM_001012 // RPS8 // ribosomal protein S8 // 1p34.1-p32 // 6202 /// NR_002224 //	0.163542	0	0.00955581	0	4.49369	4.49369	0.57106	10.3185	4.87316	4.87316	0.82829	10.6837	0.163542	-0.379475	NM_001012 // RefSeq // Homo sapiens ribosomal protein S8 (RPS8), mRNA. // chr14	NM_001012
9	3722182	NM_001158 // RefSeq // Homo sapiens amine oxidase, copper containing 2 (retina-s	NM_001158 // Hs.143102 // eye; bone; placenta; prostate; brain; whole brain; emb	chr17	+	38250135	38256250	48	NM_001158 // AOC2 // amine oxidase, copper containing 2 (retina-specific) // 17q	0.133864	9.30739e-26	0.00961377	1.90407e-18	4.45015	4.45015	1.47281	6.46187	4.99183	4.99183	2.00174	6.65093	0.133864	-0.541684	NM_001158 // RefSeq // Homo sapiens amine oxidase, copper containing 2 (retina-s	NM_001158
2	2683246	ENST00000285383 // ENSEMBL Transcript // cdna:novel chromosome:NCBI36:7:6861693	XM_001129638 // Hs.568937 // lymph node; uncharacterized tissue; mixed; tonsil /	chr3	-	75748955	75762547	35	XM_001129638 // LOC729196 // similar to unc-93 homolog B1 // 11q13.2 // 729196 /	0.263848	3.19524e-11	0.00965079	6.83145e-06	5.77973	5.77973	4.08281	7.53971	6.17359	6.17359	4.19182	8.06062	0.263848	-0.39386	ENST00000285383 // ENSEMBL Transcript // cdna:novel chromosome:NCBI36:7:6861693	ENST00000285383
7	3273054	XR_018132 // RefSeq // PREDICTED: Homo sapiens similar to angiogenic factor VG5Q	XR_018132 // Hs.646838 // --- /// XR_016313 // Hs.646838 // ---	chr10	+	135300878	135306395	85	XR_018132 // LOC391552 // similar to angiogenic factor VG5Q // 3p12.3 // 391552	0.535161	2.32678e-35	0.00966458	7.1179e-07	3.72049	3.72049	1.11967	6.73733	3.87134	3.87134	1.2771	7.3733	0.535161	-0.150843	XR_018132 // RefSeq // PREDICTED: Homo sapiens similar to angiogenic factor VG5Q	XR_018132
21	2535976	NM_000030 // RefSeq // Homo sapiens alanine-glyoxylate aminotransferase (oxalosi	NM_000030 // Hs.144567 // liver; mixed; kidney; blood; brain; mammary gland; pla	chr2	+	241456589	241468582	92	NM_000030 // AGXT // alanine-glyoxylate aminotransferase (oxalosis I; hyperoxalu	0.234577	0	0.00972709	0	5.82415	5.82415	1.72246	9.21466	6.15224	6.15224	1.96391	9.65139	0.234577	-0.328089	NM_000030 // RefSeq // Homo sapiens alanine-glyoxylate aminotransferase (oxalosi	NM_000030
23	3594986	NM_198524 // RefSeq // Homo sapiens testis expressed sequence 9 (TEX9), mRNA. //	NM_198524 // Hs.511476 // brain; lymph node; eye; embryonic tissue; uncharacteri	chr15	+	54323525	54525363	185	NM_198524 // TEX9 // testis expressed sequence 9 // 15q21.3 // 374618	0.333561	0	0.00975957	1.09607e-36	3.66716	3.66716	0.909375	7.1639	3.92371	3.92371	1.11664	7.54469	0.333561	-0.256556	NM_198524 // RefSeq // Homo sapiens testis expressed sequence 9 (TEX9), mRNA. //	NM_198524
3	3576879	AK024303 // GenBank // Homo sapiens cDNA FLJ14241 fis, clone OVARC1000533. // na	AK024303 // Hs.644234 // colon; placenta; mixed; bladder; uterus; stomach; kidne	chr14	-	91580873	91586516	18	AK024303 // UCA1 // urothelial cancer associated 1 // 19p13 // 652995 /// XM_001	0.0543002	3.83445e-09	0.00978856	0.0477981	3.8301	3.8301	1.90792	6.04695	4.43504	4.43504	2.49735	6.68742	0.0543002	-0.60494	AK024303 // GenBank // Homo sapiens cDNA FLJ14241 fis, clone OVARC1000533. // na	AK024303
23	3720343	NM_006804 // RefSeq // Homo sapiens START domain containing 3 (STARD3), mRNA. //	NM_006804 // Hs.77628 // brain; uncharacterized tissue; placenta; mixed; lung; t	chr17	+	35046867	35073248	135	NM_006804 // STARD3 // START domain containing 3 // 17q11-q12 // 10948 /// AK123	0.169938	0	0.00980907	0	6.58256	6.58256	3.57183	8.99417	7.11919	7.11919	3.29492	9.5525	0.169938	-0.536628	NM_006804 // RefSeq // Homo sapiens START domain containing 3 (STARD3), mRNA. //	NM_006804
10	3119339	NM_001039802 // RefSeq // Homo sapiens cell division cycle 42 (GTP binding prote	NM_001039802 // Hs.597524 // brain; uterus; lung; blood; mixed; kidney; uncharac	chr8	+	144148702	144175338	77	NM_001039802 // CDC42 // cell division cycle 42 (GTP binding protein, 25kDa) //	0.121233	0	0.00988221	2.77314e-20	7.41374	7.41374	4.64491	10.3534	7.96859	7.96859	4.83041	10.8687	0.121233	-0.554846	NM_001039802 // RefSeq // Homo sapiens cell division cycle 42 (GTP binding prote	NM_001039802
7	3795632	NM_020040 // RefSeq // Homo sapiens tubulin, beta polypeptide 4, member Q (TUBB4	NM_020040 // Hs.351544 // skin /// NM_177987 // Hs.532659 // embryonic tissue; t	chr18	-	33993	85881	136	NM_020040 // TUBB4Q // tubulin, beta polypeptide 4, member Q // 4q35 // 56604 //	0.119951	0	0.0099291	1.53199e-13	6.12094	6.12094	1.83761	8.83749	6.54399	6.54399	2.6116	9.616	0.119951	-0.423054	NM_020040 // RefSeq // Homo sapiens tubulin, beta polypeptide 4, member Q (TUBB4	NM_020040
23	2347132	NM_017737 // RefSeq // Homo sapiens formin binding protein 1-like (FNBP1L), tran	NM_017737 // Hs.134060 // whole brain; brain; kidney; uncharacterized tissue; em	chr1	+	93687314	93792889	176	NM_017737 // FNBP1L // formin binding protein 1-like // 1p22.1 // 54874 /// NM_0	0.866756	0	0.0099306	8.11491e-40	5.90241	5.90241	1.50547	9.43684	5.94824	5.94824	2.66304	9.83819	0.866756	-0.0458234	NM_017737 // RefSeq // Homo sapiens formin binding protein 1-like (FNBP1L), tran	NM_017737
94	3080033	NM_170606 // RefSeq // Homo sapiens myeloid/lymphoid or mixed-lineage leukemia 3	NM_170606 // Hs.647120 // brain; placenta; uncharacterized tissue; mixed; mammar	chr7	-	151462947	151763974	669	NM_170606 // MLL3 // myeloid/lymphoid or mixed-lineage leukemia 3 // 7q36.1 // 5	0.45881	0	0.00993799	0	7.01	7.01	1.09844	10.5997	7.27355	7.27355	1.11048	10.7211	0.45881	-0.263546	NM_170606 // RefSeq // Homo sapiens myeloid/lymphoid or mixed-lineage leukemia 3	NM_170606
61	3849923	NM_015719 // RefSeq // Homo sapiens collagen, type V, alpha 3 (COL5A3), mRNA. //	NM_015719 // Hs.235368 // brain; mammary gland; uncharacterized tissue; uterus;	chr19	-	9931237	9982149	336	NM_015719 // COL5A3 // collagen, type V, alpha 3 // 19p13.2 // 50509	0.092846	0	0.00994086	0	6.07835	6.07835	1.6096	10.6366	6.56269	6.56269	1.82336	11.1548	0.092846	-0.484342	NM_015719 // RefSeq // Homo sapiens collagen, type V, alpha 3 (COL5A3), mRNA. //	NM_015719
3	2714126	AK123125 // GenBank // Homo sapiens cDNA FLJ41130 fis, clone BRACE2022549. // na	AK123125 // Hs.518426 // brain; blood; whole brain; testis	chr4	+	560967	568645	20	AK123125 // FLJ41130 // hypothetical gene supported by AK123125 // 4p16.3 // 401	0.357946	3.76902e-06	0.00997045	9.09459e-07	6.4198	6.4198	4.82535	8.20488	6.80878	6.80878	5.1106	8.29696	0.357946	-0.388981	AK123125 // GenBank // Homo sapiens cDNA FLJ41130 fis, clone BRACE2022549. // na	AK123125
9	2564816	ENST00000295246 // ENSEMBL Transcript // Homo sapiens similar to LOC375251 prote	AL832977 // Hs.646318 // testis; trachea; liver; colon; whole body; mixed; brain	chr2	-	95836541	95883336	97	AL832977 // LOC400986 // protein immuno-reactive with anti-PTH polyclonal antibo	0.748048	4.96098e-33	0.0100339	2.40771e-13	5.91315	5.91315	1.87927	8.50943	6.03555	6.03555	1.84839	8.53735	0.748048	-0.122395	ENST00000295246 // ENSEMBL Transcript // Homo sapiens similar to LOC375251 prote	ENST00000295246
24	3965491	XM_104657 // RefSeq // PREDICTED: Homo sapiens similar to RIKEN cDNA 1700019P01	XM_104657 // Hs.526713 // mixed; testis; uncharacterized tissue; lymph node; blo	chr22	-	48799131	48838174	165	XM_104657 // RP3-355C18.2 // similar to RIKEN cDNA 1700019P01 // 22q13.33 // 164	0.126985	0	0.0100397	4.71817e-42	5.35605	5.35605	1.76201	11.1046	5.7661	5.7661	1.61241	11.236	0.126985	-0.410049	XM_104657 // RefSeq // PREDICTED: Homo sapiens similar to RIKEN cDNA 1700019P01	XM_104657
8	3907151	NM_002251 // RefSeq // Homo sapiens potassium voltage-gated channel, delayed-rec	NM_002251 // Hs.117780 // brain; uncharacterized tissue; mammary gland; ovary; s	chr20	-	43154365	43163167	33	NM_002251 // KCNS1 // potassium voltage-gated channel, delayed-rectifier, subfam	0.117852	5.04467e-43	0.0100485	7.66544e-16	5.51123	5.51123	2.3845	9.31802	6.15504	6.15504	1.8324	10.2618	0.117852	-0.64381	NM_002251 // RefSeq // Homo sapiens potassium voltage-gated channel, delayed-rec	NM_002251
27	3566972	ENST00000281581 // ENSEMBL Transcript // similar to Golgin subfamily A member 4	XR_015618 // Hs.569341 // mixed; brain; whole brain; uterus; lung	chr14	-	59021327	59113302	146	XR_015618 // LOC729665 // similar to Golgin subfamily A member 4 (Trans-Golgi p2	0.507282	0	0.0100591	2.32208e-23	3.57584	3.57584	0.657323	8.21935	3.72353	3.72353	0.979979	8.59244	0.507282	-0.147688	ENST00000281581 // ENSEMBL Transcript // similar to Golgin subfamily A member 4	ENST00000281581
10	3120682	NM_138431 // RefSeq // Homo sapiens major facilitator superfamily domain contain	NM_138431 // Hs.7678 // brain; uncharacterized tissue; mixed; placenta; cervix;	chr8	+	145704497	145708088	48	NM_138431 // MFSD3 // major facilitator superfamily domain containing 3 // 8q24.	0.0924539	0	0.0101266	1.19301e-30	6.81066	6.81066	3.75586	9.02527	7.37914	7.37914	4.0811	9.52495	0.0924539	-0.568477	NM_138431 // RefSeq // Homo sapiens major facilitator superfamily domain contain	NM_138431
6	3978867	XR_018667 // RefSeq // PREDICTED: Homo sapiens similar to Aspartate aminotransfe	XR_018667 // Hs.496185 // lung; mammary gland; mixed; placenta; adrenal gland; b	chrX	+	55951484	56248443	28	XR_018667 // LOC644924 // similar to Aspartate aminotransferase, mitochondrial p	0.240464	3.1026e-31	0.0101361	2.89691e-07	3.61429	3.61429	0.843622	6.02085	3.9453	3.9453	1.17974	6.82728	0.240464	-0.331009	XR_018667 // RefSeq // PREDICTED: Homo sapiens similar to Aspartate aminotransfe	XR_018667
66	3589570	NM_001013703 // RefSeq // Homo sapiens eukaryotic translation initiation factor	NM_001013703 // Hs.412102 // brain; pancreas; muscle; liver; embryonic tissue; m	chr15	+	38000541	38115083	321	NM_001013703 // EIF2AK4 // eukaryotic translation initiation factor 2 alpha kina	0.354332	0	0.01022	0	5.52129	5.52129	1.04426	9.32156	5.83643	5.83643	1.10753	9.85109	0.354332	-0.315139	NM_001013703 // RefSeq // Homo sapiens eukaryotic translation initiation factor	NM_001013703
15	3683335	ENST00000389258 // ENSEMBL Transcript // cdna:known chromosome:NCBI36:16:196257	CR625565 // Hs.585209 // bone; embryonic tissue; eye; kidney; bone marrow; liver	chr16	-	19625180	19721194	121	CR625565 // LOC400506 // similar to TSG118.1 // 16p12.3 // 400506 /// NM_0010129	0.0477694	0	0.0102548	3.5423e-21	5.50922	5.50922	2.25933	9.90575	6.14383	6.14383	3.75951	10.3965	0.0477694	-0.634605	ENST00000389258 // ENSEMBL Transcript // cdna:known chromosome:NCBI36:16:196257	ENST00000389258
16	3984468	NM_014467 // RefSeq // Homo sapiens sushi-repeat-containing protein, X-linked 2	NM_014467 // Hs.306339 // placenta; brain; liver; connective tissue; vascular; p	chrX	+	99785848	99813480	89	NM_014467 // SRPX2 // sushi-repeat-containing protein, X-linked 2 // Xq21.33-q23	0.231243	0	0.0103112	4.68752e-25	4.27487	4.27487	1.04111	6.68018	4.61963	4.61963	0.808505	7.42241	0.231243	-0.344761	NM_014467 // RefSeq // Homo sapiens sushi-repeat-containing protein, X-linked 2	NM_014467
2	3176746	XR_016905 // RefSeq // PREDICTED: Homo sapiens similar to 40S ribosomal protein	XR_016905 // Hs.647170 // --- /// XR_018414 // Hs.647170 // ---	chr9	+	83935715	83936394	24	XR_016905 // LOC442426 // similar to 40S ribosomal protein S2 // 9q21.32 // 4424	0.241161	1.16754e-09	0.0103839	0.016187	4.22118	4.22118	2.03756	5.91231	4.58216	4.58216	2.38939	6.59738	0.241161	-0.360988	XR_016905 // RefSeq // PREDICTED: Homo sapiens similar to 40S ribosomal protein	XR_016905
33	3728097	NM_003488 // RefSeq // Homo sapiens A kinase (PRKA) anchor protein 1 (AKAP1), nu	NM_003488 // Hs.463506 // testis; brain; colon; whole body; small intestine; pha	chr17	+	52517583	52667254	183	NM_003488 // AKAP1 // A kinase (PRKA) anchor protein 1 // 17q21-q23 // 8165 ///	0.227707	0	0.0104187	0	5.91403	5.91403	1.16273	9.36077	6.31091	6.31091	1.48062	9.56274	0.227707	-0.396876	NM_003488 // RefSeq // Homo sapiens A kinase (PRKA) anchor protein 1 (AKAP1), nu	NM_003488
4	2498732	BX537861 // GenBank // Homo sapiens mRNA; cDNA DKFZp686P0288 (from clone DKFZp68	BX537861 // Hs.512050 // mixed; mouth; dorsal root ganglion; tonsil; uterus ///	chr2	+	107809902	107944643	162	BX537861 // RGPD4 // RANBP2-like and GRIP domain containing 4 // 2q12.3 // 28519	0.541834	1.99412e-16	0.010448	9.33327e-06	4.0955	4.0955	1.92193	5.81466	4.26631	4.26631	2.60095	6.63161	0.541834	-0.170818	BX537861 // GenBank // Homo sapiens mRNA; cDNA DKFZp686P0288 (from clone DKFZp68	BX537861
8	3839346	NM_003121 // RefSeq // Homo sapiens Spi-B transcription factor (Spi-1/PU.1 relat	NM_003121 // Hs.437905 // lymph; lymph node; spleen; uncharacterized tissue; ton	chr19	+	55614962	55626382	48	NM_003121 // SPIB // Spi-B transcription factor (Spi-1/PU.1 related) // 19q13.3-	0.0525792	4.92817e-32	0.0105541	4.94712e-10	4.07612	4.07612	1.82038	6.4012	4.63197	4.63197	2.20679	7.54888	0.0525792	-0.555845	NM_003121 // RefSeq // Homo sapiens Spi-B transcription factor (Spi-1/PU.1 relat	NM_003121
47	3625823	NM_001002843 // RefSeq // Homo sapiens suppressor of hairy wing homolog 4 (Droso	NM_001002843 // Hs.511477 // brain; whole brain; lung; uncharacterized tissue; t	chr15	-	54709671	54817383	303	NM_001002843 // SUHW4 // suppressor of hairy wing homolog 4 (Drosophila) // 15q2	0.429289	0	0.0105694	0	5.65954	5.65954	0.944203	9.89195	5.96227	5.96227	0.991869	10.39	0.429289	-0.302729	NM_001002843 // RefSeq // Homo sapiens suppressor of hairy wing homolog 4 (Droso	NM_001002843
32	3822657	NM_078481 // RefSeq // Homo sapiens CD97 molecule (CD97), transcript variant 1,	NM_078481 // Hs.466039 // blood; thymus; spleen; brain; uterus; kidney; heart; c	chr19	+	14320054	14380649	217	NM_078481 // CD97 // CD97 molecule // 19p13 // 976 /// NM_001025160 // CD97 // C	0.120329	0	0.0105878	0	5.0744	5.0744	1.70732	9.00329	5.60757	5.60757	2.15569	9.46351	0.120329	-0.533178	NM_078481 // RefSeq // Homo sapiens CD97 molecule (CD97), transcript variant 1,	NM_078481
8	2450278	BC040731 // GenBank // Homo sapiens chromosome 1 open reading frame 98, mRNA (cD	BC040731 // Hs.434694 // brain /// BC020559 // Hs.260750 // brain; uterus; mouth	chr1	-	198578295	198610085	55	BC040731 // C1orf98 // chromosome 1 open reading frame 98 // 1q32.1 // 554279 //	0.355553	1.2225e-35	0.0106209	1.4425e-18	3.62026	3.62026	1.3238	6.48641	3.93911	3.93911	1.19108	7.56745	0.355553	-0.318846	BC040731 // GenBank // Homo sapiens chromosome 1 open reading frame 98, mRNA (cD	BC040731
61	2782545	NM_172128 // RefSeq // Homo sapiens calcium/calmodulin-dependent protein kinase	NM_172128 // Hs.144114 // muscle; brain; mixed; lymph node; uncharacterized tiss	chr4	-	114591641	114902944	479	NM_172128 // CAMK2D // calcium/calmodulin-dependent protein kinase (CaM kinase)	0.47903	0	0.0106476	0	5.92434	5.92434	1.07555	11.8543	6.18101	6.18101	1.23139	11.4839	0.47903	-0.256676	NM_172128 // RefSeq // Homo sapiens calcium/calmodulin-dependent protein kinase	NM_172128
6	2384268	NM_175055 // RefSeq // Homo sapiens histone cluster 3, H2bb (HIST3H2BB), mRNA. /	NM_175055 // Hs.376691 // pharynx; brain; mouth; whole brain; lung; colon; ascit	chr1	+	226711331	226715060	28	NM_175055 // HIST3H2BB // histone cluster 3, H2bb // 1q42.13 // 128312	0.336438	5.97681e-30	0.0106642	2.50635e-14	4.54558	4.54558	1.73439	7.03583	4.87292	4.87292	2.53755	6.95223	0.336438	-0.32734	NM_175055 // RefSeq // Homo sapiens histone cluster 3, H2bb (HIST3H2BB), mRNA. /	NM_175055
2	3631394	NM_018003 // RefSeq // Homo sapiens uveal autoantigen with coiled-coil domains a	NM_018003 // Hs.108049 // mixed; spinal cord; stomach; brain; uterus; liver; cra	chr15	-	68733951	68735049	8	NM_018003 // UACA // uveal autoantigen with coiled-coil domains and ankyrin repe	0.43542	0.00192295	0.0107261	0.000482242	3.39056	3.39056	1.76688	4.68458	3.71624	3.71624	2.44999	5.2325	0.43542	-0.325678	NM_018003 // RefSeq // Homo sapiens uveal autoantigen with coiled-coil domains a	NM_018003
202	2581000	NM_004543 // RefSeq // Homo sapiens nebulin (NEB), mRNA. // chr2 // 100 // 76 //	NM_004543 // Hs.588655 // muscle; heart; mouth; liver; trachea; connective tissu	chr2	-	152050102	152299225	973	NM_004543 // NEB // nebulin // 2q22 // 4703 /// BX648963 // NEB // nebulin // 2q	0.90367	0	0.0107351	0	4.32737	4.32737	0.71886	8.36272	4.35495	4.35495	0.808505	8.83113	0.90367	-0.0275786	NM_004543 // RefSeq // Homo sapiens nebulin (NEB), mRNA. // chr2 // 100 // 76 //	NM_004543
28	3645901	AL833594 // GenBank // Homo sapiens mRNA; cDNA DKFZp686N0964 (from clone DKFZp68	AL833594 // Hs.513296 // brain; testis; kidney; whole brain; thymus; lung; uncha	chr16	+	3433714	3476953	132	AL833594 // FLJ14154 // hypothetical protein FLJ14154 // 16p13.3 // 79903 /// AK	0.199423	0	0.0107642	0	6.56226	6.56226	1.69958	10.369	6.97663	6.97663	1.49616	10.9898	0.199423	-0.414373	AL833594 // GenBank // Homo sapiens mRNA; cDNA DKFZp686N0964 (from clone DKFZp68	AL833594
2	3686930	ENST00000380619 // ENSEMBL Transcript // Homo sapiens similar to PI-3-kinase-rel	BX647335 // Hs.623973 // ---	chr16	-	29320220	29358767	87	BX647335 // LOC641298 // PI-3-kinase-related kinase SMG-1 - like locus // 16p12.	0.313693	4.04296e-06	0.010815	4.81333e-05	4.61662	4.61662	1.25295	6.77068	5.24678	5.24678	3.09691	6.80839	0.313693	-0.630161	ENST00000380619 // ENSEMBL Transcript // Homo sapiens similar to PI-3-kinase-rel	ENST00000380619
16	3455344	NM_033033 // RefSeq // Homo sapiens keratin 82 (KRT82), mRNA. // chr12 // 100 //	NM_033033 // Hs.134640 // heart; mixed; brain	chr12	-	51074002	51086443	68	NM_033033 // KRT82 // keratin 82 // 12q13 // 3888	0.132399	0	0.010819	6.0596e-15	4.21293	4.21293	1.47371	6.69816	4.61288	4.61288	1.92247	7.42528	0.132399	-0.399956	NM_033033 // RefSeq // Homo sapiens keratin 82 (KRT82), mRNA. // chr12 // 100 //	NM_033033
34	2419046	NM_015017 // RefSeq // Homo sapiens ubiquitin specific peptidase 33 (USP33), tra	NM_015017 // Hs.480597 // brain; uncharacterized tissue; testis; bone marrow; co	chr1	-	77799823	77921682	219	NM_015017 // USP33 // ubiquitin specific peptidase 33 // 1p31.1 // 23032 /// NM_	0.520085	0	0.0108275	0	6.29758	6.29758	1.66393	9.65029	6.53262	6.53262	1.57205	9.85345	0.520085	-0.235043	NM_015017 // RefSeq // Homo sapiens ubiquitin specific peptidase 33 (USP33), tra	NM_015017
5	3844015	NM_001009 // RefSeq // Homo sapiens ribosomal protein S5 (RPS5), mRNA. // chr19	NM_001009 // Hs.378103 // embryonic tissue; brain; lung; skin; mammary gland; ey	chr19	+	63589138	63597974	123	NM_001009 // RPS5 // ribosomal protein S5 // 19q13.4 // 6193 /// BC035830 // RPS	0.180307	3.8074e-18	0.0108309	1.12853e-09	4.39135	4.39135	2.25319	6.55403	4.88448	4.88448	2.06028	7.27118	0.180307	-0.493137	NM_001009 // RefSeq // Homo sapiens ribosomal protein S5 (RPS5), mRNA. // chr19	NM_001009
2	3167110	NM_001002857 // RefSeq // Homo sapiens annexin A2 (ANXA2), transcript variant 2,	NM_001002857 // Hs.511605 // pancreas; lung; skin; liver; bone; connective tissu	chr9	+	33614223	33615510	9	NM_001002857 // ANXA2 // annexin A2 // 15q21-q22 // 302 /// NM_004039 // ANXA2 /	0.859463	4.01626e-09	0.010907	0.0236786	3.75053	3.75053	1.17141	6.38496	3.82789	3.82789	1.34698	7.6956	0.859463	-0.077358	NM_001002857 // RefSeq // Homo sapiens annexin A2 (ANXA2), transcript variant 2,	NM_001002857
16	2377141	NM_000715 // RefSeq // Homo sapiens complement component 4 binding protein, alph	NM_000715 // Hs.1012 // liver; lung; mixed; uncharacterized tissue; pancreas; bl	chr1	+	205328821	205339939	73	NM_000715 // C4BPA // complement component 4 binding protein, alpha // 1q32 // 7	0.403973	0	0.0110575	7.23318e-18	3.91517	3.91517	1.09844	7.78256	4.15151	4.15151	0.53994	8.51339	0.403973	-0.236337	NM_000715 // RefSeq // Homo sapiens complement component 4 binding protein, alph	NM_000715
2	3452520	XR_016563 // RefSeq // PREDICTED: Homo sapiens similar to Interferon-induced tra	XR_016563 // Hs.450907 // blood; ovary; connective tissue; colon; lymph node; ot	chr12	-	45815952	45818400	6	XR_016563 // LOC643058 // similar to Interferon-induced transmembrane protein 3	0.553414	6.97421e-06	0.0110623	0.199642	4.12987	4.12987	1.81137	5.98243	3.93515	3.93515	2.38762	6.06296	0.553414	0.194715	XR_016563 // RefSeq // PREDICTED: Homo sapiens similar to Interferon-induced tra	XR_016563
29	3074857	NM_002825 // RefSeq // Homo sapiens pleiotrophin (heparin binding growth factor	NM_002825 // Hs.371249 // brain; connective tissue; cochlea; whole brain; unchar	chr7	-	136562637	136716842	202	NM_002825 // PTN // pleiotrophin (heparin binding growth factor 8, neurite growt	0.283216	0	0.0111264	1.4013e-45	5.20199	5.20199	1.09907	11.4562	5.51482	5.51482	1.39756	11.6494	0.283216	-0.312823	NM_002825 // RefSeq // Homo sapiens pleiotrophin (heparin binding growth factor	NM_002825
17	3442176	NM_016162 // RefSeq // Homo sapiens inhibitor of growth family, member 4 (ING4),	NM_016162 // Hs.524210 // mixed; brain; lung; uncharacterized tissue; other; mou	chr12	-	6629710	6642844	85	NM_016162 // ING4 // inhibitor of growth family, member 4 // 12p13.31 // 51147 /	0.11806	0	0.0111583	1.4357e-29	6.26324	6.26324	1.70934	10.2041	6.73315	6.73315	2.11763	10.5847	0.11806	-0.469913	NM_016162 // RefSeq // Homo sapiens inhibitor of growth family, member 4 (ING4),	NM_016162
4	3395672	NM_006802 // RefSeq // Homo sapiens splicing factor 3a, subunit 3, 60kDa (SF3A3)	NM_006802 // Hs.77897 // brain; testis; uncharacterized tissue; lung; uterus; wh	chr11	-	122973197	122975370	32	NM_006802 // SF3A3 // splicing factor 3a, subunit 3, 60kDa // 1p34.3 // 10946 //	0.471889	1.15638e-14	0.0111734	0.00793593	3.42683	3.42683	0.747535	5.32602	3.6121	3.6121	0.906502	5.42307	0.471889	-0.185265	NM_006802 // RefSeq // Homo sapiens splicing factor 3a, subunit 3, 60kDa (SF3A3)	NM_006802
17	2407903	NM_003819 // RefSeq // Homo sapiens poly(A) binding protein, cytoplasmic 4 (indu	NM_003819 // Hs.169900 // skin; brain; testis; colon; embryonic tissue; lung; ut	chr1	-	39760546	39797926	108	NM_003819 // PABPC4 // poly(A) binding protein, cytoplasmic 4 (inducible form) /	0.354058	0	0.0112604	4.73015e-26	5.10548	5.10548	1.50859	7.58815	5.43278	5.43278	1.62767	7.65539	0.354058	-0.327294	NM_003819 // RefSeq // Homo sapiens poly(A) binding protein, cytoplasmic 4 (indu	NM_003819
15	3840194	ENST00000344085 // ENSEMBL Transcript // Homo sapiens similar to zinc finger pro	NM_001004301 // Hs.433293 // prostate; embryonic tissue; uncharacterized tissue;	chr19	+	57564998	57588785	80	BC058819 // LOC400713 // zinc finger-like // 19q13.41 // 400713 /// NM_001004301	0.340141	0	0.0112607	3.28529e-22	5.35588	5.35588	1.77393	8.80746	5.66792	5.66792	2.04187	9.06554	0.340141	-0.312038	ENST00000344085 // ENSEMBL Transcript // Homo sapiens similar to zinc finger pro	ENST00000344085
8	2523874	NM_012092 // RefSeq // Homo sapiens inducible T-cell co-stimulator (ICOS), mRNA.	NM_012092 // Hs.56247 // pharynx; uterus; uncharacterized tissue; mixed; brain;	chr2	+	204489759	204534541	55	NM_012092 // ICOS // inducible T-cell co-stimulator // 2q33 // 29851	0.0723573	2.70155e-16	0.011266	4.48958e-05	3.16294	3.16294	1.44921	4.85197	3.5682	3.5682	1.23094	5.13928	0.0723573	-0.405268	NM_012092 // RefSeq // Homo sapiens inducible T-cell co-stimulator (ICOS), mRNA.	NM_012092
30	3821121	ENST00000327804 // ENSEMBL Transcript // hypothetical protein LOC126075, transcr	XM_496289 // Hs.631636 // brain; lung; uterus; mammary gland; thymus; pancreas;	chr19	+	11316367	11327034	145	XM_496289 // LOC126075 // hypothetical protein LOC126075 // 19p13.2 // 126075 //	0.0895774	0	0.0112768	0	4.90568	4.90568	1.85572	8.95169	5.5141	5.5141	2.17531	9.29091	0.0895774	-0.608418	ENST00000327804 // ENSEMBL Transcript // hypothetical protein LOC126075, transcr	ENST00000327804
5	3796122	NM_032810 // RefSeq // Homo sapiens ATPase family, AAA domain containing 1 (ATAD	NM_032810 // Hs.435948 // brain; mixed; whole brain; prostate; uncharacterized t	chr18	-	1352317	1353874	33	NM_032810 // ATAD1 // ATPase family, AAA domain containing 1 // 10q23.2 // 84896	0.662056	3.57793e-34	0.0112819	0.00432371	3.16385	3.16385	1.08098	7.96429	3.25885	3.25885	0.891839	8.27627	0.662056	-0.0950022	NM_032810 // RefSeq // Homo sapiens ATPase family, AAA domain containing 1 (ATAD	NM_032810
30	3799542	NM_024899 // RefSeq // Homo sapiens centrosomal protein 76kDa (CEP76), mRNA. //	NM_024899 // Hs.236940 // testis; bone marrow; brain; pharynx; mouth; mixed; kid	chr18	-	12648554	12692758	138	NM_024899 // CEP76 // centrosomal protein 76kDa // 18p11.21 // 79959 /// BC03302	0.426354	0	0.0113133	0	4.363	4.363	1.00419	10.6906	4.60653	4.60653	0.804355	11.1451	0.426354	-0.243528	NM_024899 // RefSeq // Homo sapiens centrosomal protein 76kDa (CEP76), mRNA. //	NM_024899
2	3481154	NM_000972 // RefSeq // Homo sapiens ribosomal protein L7a (RPL7A), mRNA. // chr1	NM_000972 // Hs.499839 // lung; brain; pancreas; skin; uterus; embryonic tissue;	chr13	+	22250083	22275900	28	NM_000972 // RPL7A // ribosomal protein L7a // 9q34 // 6130 /// BC023624 // RPL7	0.30527	9.09515e-10	0.011314	0.00198843	3.11284	3.11284	1.31503	5.19511	3.45834	3.45834	1.68516	4.89155	0.30527	-0.345499	NM_000972 // RefSeq // Homo sapiens ribosomal protein L7a (RPL7A), mRNA. // chr1	NM_000972
23	2496280	NM_024065 // RefSeq // Homo sapiens phosducin-like 3 (PDCL3), mRNA. // chr2 // 1	NM_024065 // Hs.469459 // eye; mixed; embryonic tissue; blood; colon; muscle; va	chr2	+	100507181	100629253	228	NM_024065 // PDCL3 // phosducin-like 3 // 2q11.2 // 79031 /// AF267853 // PDCL3	0.175369	0	0.011317	2.3303e-31	5.03981	5.03981	1.23989	10.5771	5.4025	5.4025	2.02733	10.6867	0.175369	-0.362695	NM_024065 // RefSeq // Homo sapiens phosducin-like 3 (PDCL3), mRNA. // chr2 // 1	NM_024065
6	2646846	XM_945588 // RefSeq // PREDICTED: Homo sapiens hypothetical gene supported by AK	XM_945588 // Hs.647923 // brain; testis; liver /// XM_498945 // Hs.647923 // bra	chr3	+	148621476	148782346	44	XM_945588 // FLJ30375 // hypothetical gene supported by AK054937 // 3q24 // 4409	0.232622	4.32507e-21	0.0113527	9.87986e-12	3.90733	3.90733	2.0381	6.42436	4.30337	4.30337	1.78713	6.64858	0.232622	-0.396038	XM_945588 // RefSeq // PREDICTED: Homo sapiens hypothetical gene supported by AK	XM_945588
13	2656627	NM_014375 // RefSeq // Homo sapiens fetuin B (FETUB), mRNA. // chr3 // 100 // 10	NM_014375 // Hs.81073 // mixed; liver; mouth; kidney; blood; connective tissue;	chr3	+	187836415	187853488	78	NM_014375 // FETUB // fetuin B // 3q27 // 26998	0.245624	0	0.0113531	1.74299e-21	3.98484	3.98484	1.64144	6.37722	4.29807	4.29807	1.37225	6.80837	0.245624	-0.313221	NM_014375 // RefSeq // Homo sapiens fetuin B (FETUB), mRNA. // chr3 // 100 // 10	NM_014375
6	2350981	NM_000561 // RefSeq // Homo sapiens glutathione S-transferase M1 (GSTM1), transc	NM_000561 // Hs.301961 // brain; mixed; mammary gland; lung; eye; prostate; test	chr1	+	110031965	110042730	76	NM_000561 // GSTM1 // glutathione S-transferase M1 // 1p13.3 // 2944 /// NM_1464	0.0131464	6.86546e-19	0.0113831	0.000144948	5.33895	5.33895	2.5982	9.01807	6.3751	6.3751	4.01666	10.4352	0.0131464	-1.03614	NM_000561 // RefSeq // Homo sapiens glutathione S-transferase M1 (GSTM1), transc	NM_000561
2	3716142	AK093030 // GenBank // Homo sapiens cDNA FLJ35711 fis, clone TESOP1000035. // ch	AK093030 // Hs.514050 // stomach; muscle; blood; liver; brain; mammary gland; te	chr17	+	24920670	24922285	8	AK093030 // TP53I13 // tumor protein p53 inducible protein 13 // 17q11.2 // 9031	0.905716	1.45278e-09	0.0114236	0.00447227	6.11781	6.11781	4.24149	8.02223	6.15775	6.15775	4.14695	8.66486	0.905716	-0.0399415	AK093030 // GenBank // Homo sapiens cDNA FLJ35711 fis, clone TESOP1000035. // ch	AK093030
4	3953196	NM_033257 // RefSeq // Homo sapiens DiGeorge syndrome critical region gene 6-lik	NM_033257 // Hs.410965 // brain; mixed; lung; prostate; embryonic tissue; kidney	chr22	-	18677500	18687608	53	NM_033257 // DGCR6L // DiGeorge syndrome critical region gene 6-like // 22q11 //	0.297772	4.55755e-24	0.0114306	1.32864e-07	5.15879	5.15879	2.734	8.45007	5.54338	5.54338	2.41069	9.18302	0.297772	-0.384593	NM_033257 // RefSeq // Homo sapiens DiGeorge syndrome critical region gene 6-lik	NM_033257
15	3644162	NM_012225 // RefSeq // Homo sapiens nucleotide binding protein 2 (MinD homolog,	NM_012225 // Hs.256549 // brain; colon; mammary gland; thymus; muscle; connectiv	chr16	+	1772944	1779298	64	NM_012225 // NUBP2 // nucleotide binding protein 2 (MinD homolog, E. coli) // 16	0.121176	0	0.0114317	1.09281e-37	6.11608	6.11608	2.57146	9.87737	6.66939	6.66939	1.86903	10.3468	0.121176	-0.553304	NM_012225 // RefSeq // Homo sapiens nucleotide binding protein 2 (MinD homolog,	NM_012225
57	3308241	NM_005264 // RefSeq // Homo sapiens GDNF family receptor alpha 1 (GFRA1), transc	NM_005264 // Hs.591913 // mammary gland; mixed; testis; spleen; whole brain; sma	chr10	-	117699290	118023785	408	NM_005264 // GFRA1 // GDNF family receptor alpha 1 // 10q26 // 2674 /// NM_14579	0.181746	0	0.0114396	0	4.52011	4.52011	1.2448	8.88707	4.90106	4.90106	0.979917	9.40576	0.181746	-0.380948	NM_005264 // RefSeq // Homo sapiens GDNF family receptor alpha 1 (GFRA1), transc	NM_005264
12	3637367	NM_022480 // RefSeq // Homo sapiens kelch-like 25 (Drosophila) (KLHL25), mRNA. /	NM_022480 // Hs.498371 // brain; whole brain; testis; pancreas; adipose tissue;	chr15	-	84103562	84139155	72	NM_022480 // KLHL25 // kelch-like 25 (Drosophila) // 15q25.3 // 64410	0.306899	2.76e-16	0.0115231	8.86453e-25	5.38554	5.38554	2.97637	7.02662	5.74929	5.74929	2.68602	7.58163	0.306899	-0.363754	NM_022480 // RefSeq // Homo sapiens kelch-like 25 (Drosophila) (KLHL25), mRNA. /	NM_022480
10	2452615	NM_033102 // RefSeq // Homo sapiens solute carrier family 45, member 3 (SLC45A3)	NM_033102 // Hs.278695 // prostate; uncharacterized tissue; brain; lung; kidney;	chr1	-	203893040	203916230	48	NM_033102 // SLC45A3 // solute carrier family 45, member 3 // 1q32.1 // 85414 //	0.103107	6.56228e-42	0.0115338	1.1314e-27	5.36261	5.36261	2.64885	7.633	6.04574	6.04574	3.44128	8.99656	0.103107	-0.683132	NM_033102 // RefSeq // Homo sapiens solute carrier family 45, member 3 (SLC45A3)	NM_033102
17	3756630	NM_182497 // RefSeq // Homo sapiens keratin 40 (KRT40), mRNA. // chr17 // 100 //	XM_001133055 // Hs.567666 // pituitary gland	chr17	-	36387504	36396779	69	NM_182497 // KRT40 // keratin 40 // 17q21.2 // 125115 /// XM_001133055 // LOC728	0.23242	0	0.0115573	4.36527e-23	4.00781	4.00781	1.48835	7.72041	4.32416	4.32416	1.17974	8.52918	0.23242	-0.316351	NM_182497 // RefSeq // Homo sapiens keratin 40 (KRT40), mRNA. // chr17 // 100 //	NM_182497
11	3855596	NM_176880 // RefSeq // Homo sapiens TR4 orphan receptor associated protein TRA16	NM_176880 // Hs.645235 // spinal cord; embryonic tissue; kidney; uncharacterized	chr19	-	19173232	19179278	47	NM_176880 // TRA16 // TR4 orphan receptor associated protein TRA16 // 19p13.11 /	0.054767	0	0.0115638	2.57335e-25	4.97945	4.97945	2.28057	7.16711	5.67339	5.67339	2.8532	7.81922	0.054767	-0.693948	NM_176880 // RefSeq // Homo sapiens TR4 orphan receptor associated protein TRA16	NM_176880
2	3432553	NM_006187 // RefSeq // Homo sapiens 2'-5'-oligoadenylate synthetase 3, 100kDa (O	NM_006187 // Hs.528634 // uterus; skin; brain; mammary gland; blood; lung; esoph	chr12	+	111944072	111944176	8	NM_006187 // OAS3 // 2'-5'-oligoadenylate synthetase 3, 100kDa // 12q24.2 // 494	0.933002	4.38297e-05	0.0116153	0.00975878	2.20802	2.20802	1.40385	3.23251	2.19047	2.19047	1.56354	3.09023	0.933002	0.0175525	NM_006187 // RefSeq // Homo sapiens 2'-5'-oligoadenylate synthetase 3, 100kDa (O	NM_006187
22	3756761	NM_004138 // RefSeq // Homo sapiens keratin 33A (KRT33A), mRNA. // chr17 // 100	NM_004138 // Hs.512579 // testis /// NM_032524 // Hs.307022 // --- /// AJ406935	chr17	-	36549217	36719008	195	NM_004138 // KRT33A // keratin 33A // 17q12-q21 // 3883 /// NM_032524 // KRTAP4-	0.164407	0	0.0116287	2.49485e-37	4.87	4.87	1.42312	12.5183	5.34991	5.34991	1.47006	12.7412	0.164407	-0.479911	NM_004138 // RefSeq // Homo sapiens keratin 33A (KRT33A), mRNA. // chr17 // 100	NM_004138
15	3786194	BC040725 // GenBank // Homo sapiens cDNA clone IMAGE:6154673. // chr18 // 98 //	BC040725 // Hs.464983 // eye; mixed; liver; adrenal gland; brain; pancreas; musc	chr18	+	38020658	38525379	226	BC040725 // LOC284260 // hypothetical gene supported by BC011527; BC021928; BC01	0.0934687	0	0.0116303	3.22997e-25	3.82643	3.82643	1.76348	6.77708	4.34574	4.34574	1.77996	7.68891	0.0934687	-0.519318	BC040725 // GenBank // Homo sapiens cDNA clone IMAGE:6154673. // chr18 // 98 //	BC040725
17	3888474	NM_018683 // RefSeq // Homo sapiens zinc finger protein 313 (ZNF313), mRNA. // c	NM_018683 // Hs.144949 // brain; lung; colon; mixed; testis; uterus; bone marrow	chr20	+	47986321	48003818	93	NM_018683 // ZNF313 // zinc finger protein 313 // 20q13.13 // 55905 /// AK097265	0.173463	0	0.0116321	0	6.42431	6.42431	1.90046	10.221	6.99654	6.99654	1.77223	10.7695	0.173463	-0.572235	NM_018683 // RefSeq // Homo sapiens zinc finger protein 313 (ZNF313), mRNA. // c	NM_018683
2	3822949	NM_012377 // RefSeq // Homo sapiens olfactory receptor, family 7, subfamily C, m	NM_012377 // Hs.589620 // liver	chr19	+	14913175	14914260	12	NM_012377 // OR7C2 // olfactory receptor, family 7, subfamily C, member 2 // 19p	0.149415	0.97852	0.0116838	4.40904e-05	3.41962	3.41962	2.24808	4.69987	3.99396	3.99396	2.95524	4.9627	0.149415	-0.574341	NM_012377 // RefSeq // Homo sapiens olfactory receptor, family 7, subfamily C, m	NM_012377
23	3534886	NM_172193 // RefSeq // Homo sapiens kelch domain containing 1 (KLHDC1), mRNA. //	NM_172193 // Hs.509258 // brain; pancreas; whole brain; kidney; embryonic tissue	chr14	+	49229372	49289617	94	NM_172193 // KLHDC1 // kelch domain containing 1 // 14q22.1 // 122773 /// AK0987	0.440926	0	0.0117125	0	5.9269	5.9269	1.61712	11.7819	6.24372	6.24372	1.24472	12.2413	0.440926	-0.316827	NM_172193 // RefSeq // Homo sapiens kelch domain containing 1 (KLHDC1), mRNA. //	NM_172193
51	3627248	NM_001002858 // RefSeq // Homo sapiens annexin A2 (ANXA2), transcript variant 1,	NM_001002858 // Hs.511605 // pancreas; lung; skin; liver; bone; connective tissu	chr15	-	58247806	58482354	419	NM_001002858 // ANXA2 // annexin A2 // 15q21-q22 // 302 /// NM_001002857 // ANXA	0.143288	0	0.0117485	0	3.85649	3.85649	0.998546	8.45506	4.30944	4.30944	1.24446	10.0373	0.143288	-0.452945	NM_001002858 // RefSeq // Homo sapiens annexin A2 (ANXA2), transcript variant 1,	NM_001002858
19	2450668	NM_016456 // RefSeq // Homo sapiens transmembrane protein 9 (TMEM9), mRNA. // ch	NM_016456 // Hs.181444 // brain; lung; mixed; eye; uncharacterized tissue; embry	chr1	-	199370528	199425958	131	NM_016456 // TMEM9 // transmembrane protein 9 // --- // 252839 /// AY359012 // T	0.20798	0	0.0117573	0	6.21179	6.21179	2.52647	9.76006	6.6906	6.6906	2.50195	10.1063	0.20798	-0.47881	NM_016456 // RefSeq // Homo sapiens transmembrane protein 9 (TMEM9), mRNA. // ch	NM_016456
2	3982405	ENST00000360548 // ENSEMBL Transcript // Full-length cDNA clone CS0DL001YC23 of	NM_198484 // Hs.19977 // brain; whole brain; uncharacterized tissue; uterus; bon	chrX	+	76968658	76971249	16	NM_198484 // ZNF621 // zinc finger protein 621 // 3p22.1 // 285268	0.390879	0.000266708	0.0117655	0.0830598	2.29309	2.29309	1.09103	3.59248	2.49485	2.49485	1.59222	3.82298	0.390879	-0.201756	ENST00000360548 // ENSEMBL Transcript // Full-length cDNA clone CS0DL001YC23 of	ENST00000360548
26	3671506	NM_012213 // RefSeq // Homo sapiens malonyl-CoA decarboxylase (MLYCD), nuclear g	NM_012213 // Hs.644610 // lung; brain; mixed; whole brain; uncharacterized tissu	chr16	+	82515119	82557437	173	NM_012213 // MLYCD // malonyl-CoA decarboxylase // 16q24 // 23417 /// NM_182981	0.188995	0	0.0118131	0	5.50715	5.50715	1.49335	8.59798	5.881	5.881	1.66883	9.30116	0.188995	-0.373847	NM_012213 // RefSeq // Homo sapiens malonyl-CoA decarboxylase (MLYCD), nuclear g	NM_012213
20	2427850	ENST00000327647 // ENSEMBL Transcript // cdna:novel chromosome:NCBI36:1:1117339	XR_016328 // Hs.568387 // mixed /// XR_018652 // Hs.568387 // mixed	chr1	-	111690785	111747168	124	XR_016328 // LOC441897 // similar to Gastricsin precursor (Pepsinogen C) // 1p13	0.244425	0	0.0118462	3.37863e-34	4.37802	4.37802	1.50749	7.58876	4.68988	4.68988	1.42029	7.93652	0.244425	-0.31186	ENST00000327647 // ENSEMBL Transcript // cdna:novel chromosome:NCBI36:1:1117339	ENST00000327647
12	3138880	NR_002599 // RefSeq // Homo sapiens small nucleolar RNA host gene (non-protein c	NR_002599 // Hs.372680 // brain; other; testis; blood; pancreas; pituitary gland	chr8	-	67996451	68001167	52	NR_002599 // SNHG6 // small nucleolar RNA host gene (non-protein coding) 6 // 8q	0.100382	0	0.0118512	8.17799e-18	6.41322	6.41322	2.61196	10.4437	6.86888	6.86888	2.54874	10.7489	0.100382	-0.455652	NR_002599 // RefSeq // Homo sapiens small nucleolar RNA host gene (non-protein c	NR_002599
20	3315341	NM_201564 // RefSeq // Homo sapiens synaptonemal complex central element protein	NM_201564 // Hs.553795 // testis; brain; placenta; mixed; uncharacterized tissue	chr10	-	135216865	135240669	136	NM_201564 // SYCE1 // synaptonemal complex central element protein 1 // 10q26.3	0.0827336	0	0.0118574	1.30654e-39	5.41602	5.41602	2.4977	9.61275	5.95586	5.95586	2.19379	9.31921	0.0827336	-0.539846	NM_201564 // RefSeq // Homo sapiens synaptonemal complex central element protein	NM_201564
18	3981400	GENSCAN00000042000 // ENSEMBL Prediction // cdna:Genscan chromosome:NCBI36:X:71	BX640894 // Hs.144309 // brain; mixed; testis; uterus; colon; rectum; uncharacte	chrX	+	71445106	71479192	101	BX640894 // PCGF3 // polycomb group ring finger 3 // 4p16.3 // 10336	0.243396	0	0.0118583	5.28409e-14	4.55271	4.55271	1.97418	8.10065	4.83221	4.83221	2.38852	8.76862	0.243396	-0.279501	GENSCAN00000042000 // ENSEMBL Prediction // cdna:Genscan chromosome:NCBI36:X:71	GENSCAN00000042000
6	3746327	BC071823 // GenBank // Homo sapiens cDNA clone IMAGE:6613895, partial cds. // na	BC071823 // Hs.447556 // testis; mixed	chr17	-	14055713	14081658	62	BC071823 // CDRT15 // CMT1A duplicated region transcript 15 // 17p12 // 146822	0.10973	1.7827e-33	0.0118816	2.6499e-08	4.84532	4.84532	1.86883	7.93912	5.3491	5.3491	2.60983	8.758	0.10973	-0.503776	BC071823 // GenBank // Homo sapiens cDNA clone IMAGE:6613895, partial cds. // na	BC071823
12	3823511	NM_003290 // RefSeq // Homo sapiens tropomyosin 4 (TPM4), mRNA. // chr19 // 100	NM_003290 // Hs.631618 // brain; uterus; mammary gland; colon; uncharacterized t	chr19	+	16036141	16074803	146	NM_003290 // TPM4 // tropomyosin 4 // 19p13.1 // 7171 /// BC037576 // TPM4 // tr	0.117347	0	0.0118824	1.45163e-20	5.71924	5.71924	2.5522	11.8824	6.24402	6.24402	2.20525	12.0571	0.117347	-0.524778	NM_003290 // RefSeq // Homo sapiens tropomyosin 4 (TPM4), mRNA. // chr19 // 100	NM_003290
29	3641777	NM_178842 // RefSeq // Homo sapiens LAG1 homolog, ceramide synthase 3 (S. cerevi	NM_178842 // Hs.416099 // testis; mouth; whole body; mixed; lung; eye; esophagus	chr15	-	98758123	98902703	151	NM_178842 // LASS3 // LAG1 homolog, ceramide synthase 3 (S. cerevisiae) // 15q26	0.155957	0	0.0119321	4.74065e-36	3.69396	3.69396	1.04548	7.19387	4.07564	4.07564	0.94615	7.8084	0.155957	-0.381679	NM_178842 // RefSeq // Homo sapiens LAG1 homolog, ceramide synthase 3 (S. cerevi	NM_178842
9	3602497	NM_173469 // RefSeq // Homo sapiens ubiquitin-conjugating enzyme E2Q (putative)	NM_173469 // Hs.23033 // uterus; vascular; brain; placenta; testis; ovary; other	chr15	+	73922713	73980431	109	NM_173469 // UBE2Q2 // ubiquitin-conjugating enzyme E2Q (putative) 2 // 15q24.2	0.249361	0	0.0119392	2.47364e-13	6.14121	6.14121	2.68679	8.54214	6.49394	6.49394	2.828	8.97594	0.249361	-0.352724	NM_173469 // RefSeq // Homo sapiens ubiquitin-conjugating enzyme E2Q (putative)	NM_173469
28	3824226	NM_032620 // RefSeq // Homo sapiens GTP binding protein 3 (mitochondrial) (GTPBP	NM_032620 // Hs.334885 // brain; embryonic tissue; uterus; mixed; muscle; bladde	chr19	+	17306840	17314540	120	NM_032620 // GTPBP3 // GTP binding protein 3 (mitochondrial) // 19p13.11 // 8470	0.268021	0	0.0119472	0	5.38149	5.38149	1.45973	9.69204	5.75325	5.75325	2.51877	10.2204	0.268021	-0.371756	NM_032620 // RefSeq // Homo sapiens GTP binding protein 3 (mitochondrial) (GTPBP	NM_032620
63	3544251	BC023570 // GenBank // Homo sapiens YLP motif containing 1, mRNA (cDNA clone IMA	BC023570 // Hs.531111 // larynx; colon; brain; uncharacterized tissue; mixed; wh	chr14	+	74299792	74393568	306	BC023570 // YLPM1 // YLP motif containing 1 // 14q24.3 // 56252 /// AK095760 //	0.40206	0	0.0119811	0	6.67834	6.67834	1.29169	10.4625	6.9845	6.9845	1.66016	11.216	0.40206	-0.30616	BC023570 // GenBank // Homo sapiens YLP motif containing 1, mRNA (cDNA clone IMA	BC023570
2	4053812	BC089444 // GenBank // Homo sapiens hypothetical protein FLJ39378, mRNA (cDNA cl	BC089444 // Hs.530315 // brain; stomach; embryonic tissue; mammary gland; unchar	chr12	-	122567821	122583982	52	BC089444 // FLJ39378 // hypothetical protein FLJ39378 // 12q24.31 // 353116 ///	0.18918	8.55696e-07	0.0120048	0.00101734	5.19511	5.19511	3.90109	7.31298	5.7724	5.7724	3.38519	7.98596	0.18918	-0.577291	BC089444 // GenBank // Homo sapiens hypothetical protein FLJ39378, mRNA (cDNA cl	BC089444
12	2362511	NM_002036 // RefSeq // Homo sapiens Duffy blood group, chemokine receptor (DARC)	NM_002036 // Hs.153381 // brain; lung; pharynx; testis; colon; mixed; cervix; un	chr1	+	157439818	157442966	53	NM_002036 // DARC // Duffy blood group, chemokine receptor // 1q21-q22 // 2532 /	0.11642	0	0.0120106	1.12268e-29	5.94812	5.94812	1.25425	8.2142	6.53436	6.53436	1.72475	8.71941	0.11642	-0.586245	NM_002036 // RefSeq // Homo sapiens Duffy blood group, chemokine receptor (DARC)	NM_002036
3	3923865	NM_181688 // RefSeq // Homo sapiens keratin associated protein 10-10 (KRTAP10-10	NM_181688 // Hs.474001 // --- /// NM_198693 // Hs.567902 // lung; eye; uncharact	chr21	+	44881701	44882800	32	NM_181688 // KRTAP10-10 // keratin associated protein 10-10 // 21q22.3 // 353333	0.685694	0.179906	0.0120168	0.00021125	4.9962	4.9962	3.76906	6.01978	5.13474	5.13474	3.69612	6.6146	0.685694	-0.138541	NM_181688 // RefSeq // Homo sapiens keratin associated protein 10-10 (KRTAP10-10	NM_181688
2	3210008	NM_173651 // RefSeq // Homo sapiens fibrous sheath interacting protein 2 (FSIP2)	NM_173651 // Hs.376600 // whole body; embryonic tissue; mammary gland; testis; h	chr9	-	76509010	76510026	8	NM_173651 // FSIP2 // fibrous sheath interacting protein 2 // 2q32.1 // 285135	0.384141	6.69478e-06	0.0120308	0.0132336	4.68493	4.68493	3.19281	6.04773	4.95385	4.95385	3.51558	5.98919	0.384141	-0.268916	NM_173651 // RefSeq // Homo sapiens fibrous sheath interacting protein 2 (FSIP2)	NM_173651
23	3978943	NM_007250 // RefSeq // Homo sapiens Kruppel-like factor 8 (KLF8), mRNA. // chrX	NM_007250 // Hs.646614 // brain; uterus; placenta; kidney; muscle; eye; embryoni	chrX	+	56245053	56335146	95	NM_007250 // KLF8 // Kruppel-like factor 8 // Xp11.21 // 11279 /// BX641066 // K	0.25822	0	0.0120504	2.09549e-35	4.39532	4.39532	0.765152	8.40028	4.75403	4.75403	1.2292	9.65986	0.25822	-0.358707	NM_007250 // RefSeq // Homo sapiens Kruppel-like factor 8 (KLF8), mRNA. // chrX	NM_007250
2	3553923	AK125022 // GenBank // Homo sapiens cDNA FLJ43032 fis, clone BRTHA3001221. // ch	AF116691 // Hs.116459 // brain; pharynx; bone marrow; testis; ovary; skin; lung;	chr14	+	103223686	103226250	12	AF116691 // MAN2A2 // mannosidase, alpha, class 2A, member 2 // 15q26.1 // 4122	0.226029	2.89589e-07	0.0120587	0.000214026	5.90461	5.90461	4.23755	7.12623	6.3349	6.3349	5.0309	7.85559	0.226029	-0.430285	AK125022 // GenBank // Homo sapiens cDNA FLJ43032 fis, clone BRTHA3001221. // ch	AK125022
15	3981164	NM_052957 // RefSeq // Homo sapiens acidic repeat containing (ACRC), mRNA. // ch	NM_052957 // Hs.135167 // testis; uncharacterized tissue; blood; mixed; embryoni	chrX	+	70714973	70750158	93	NM_052957 // ACRC // acidic repeat containing // Xq13.1 // 93953 /// AK127607 //	0.151566	0	0.0121458	4.36588e-19	4.81158	4.81158	2.24938	7.33046	5.20881	5.20881	1.94306	7.6882	0.151566	-0.397236	NM_052957 // RefSeq // Homo sapiens acidic repeat containing (ACRC), mRNA. // ch	NM_052957
30	3133233	NM_000931 // RefSeq // Homo sapiens plasminogen activator, tissue (PLAT), transc	NM_000931 // Hs.491582 // skin; vascular; brain; testis; kidney; lung; pancreas;	chr8	-	42151651	42184811	141	NM_000931 // PLAT // plasminogen activator, tissue // 8p12 // 5327 /// NM_033011	0.148979	0	0.0121474	0	5.28549	5.28549	1.53812	8.16976	5.79762	5.79762	1.59845	8.76519	0.148979	-0.512135	NM_000931 // RefSeq // Homo sapiens plasminogen activator, tissue (PLAT), transc	NM_000931
26	2421995	NM_052941 // RefSeq // Homo sapiens guanylate binding protein 4 (GBP4), mRNA. //	NM_052941 // Hs.409925 // uterus; placenta; uncharacterized tissue; pharynx; sto	chr1	-	89419435	89437211	123	NM_052941 // GBP4 // guanylate binding protein 4 // 1p22.2 // 115361 /// NM_2073	0.184362	0	0.0121658	1.25227e-36	4.17073	4.17073	1.17141	7.85758	4.56408	4.56408	0.857504	8.35139	0.184362	-0.393359	NM_052941 // RefSeq // Homo sapiens guanylate binding protein 4 (GBP4), mRNA. //	NM_052941
25	2538050	NM_021109 // RefSeq // Homo sapiens thymosin, beta 4, X-linked (TMSB4X), mRNA. /	NM_021109 // Hs.522584 // brain; mixed; uncharacterized tissue; lung; vascular;	chr2	-	3611098	3661230	180	NM_021109 // TMSB4X // thymosin, beta 4, X-linked // Xq21.3-q22 // 7114 /// NM_1	0.190459	0	0.01218	0	4.8823	4.8823	1.72449	8.48629	5.3102	5.3102	1.94395	9.77046	0.190459	-0.427907	NM_021109 // RefSeq // Homo sapiens thymosin, beta 4, X-linked (TMSB4X), mRNA. /	NM_021109
25	3037861	NM_001037763 // RefSeq // Homo sapiens collagen, type XXVIII, alpha 1 (COL28A1),	NM_001037763 // Hs.491104 // mixed; placenta; cranial nerve; vascular; brain; ut	chr7	-	7422421	7545252	179	NM_001037763 // COL28A1 // collagen, type XXVIII, alpha 1 // 7p21.3 // 340267 //	0.426327	0	0.012187	4.38046e-42	4.23335	4.23335	1.82083	7.32356	4.49302	4.49302	1.73203	7.64803	0.426327	-0.259665	NM_001037763 // RefSeq // Homo sapiens collagen, type XXVIII, alpha 1 (COL28A1),	NM_001037763
16	3504134	NM_021954 // RefSeq // Homo sapiens gap junction protein, alpha 3, 46kDa (connex	NM_021954 // Hs.130313 // lung; mixed; eye; kidney; embryonic tissue; brain; ova	chr13	-	19577207	19633670	138	NM_021954 // GJA3 // gap junction protein, alpha 3, 46kDa (connexin 46) // 13q11	0.135561	0	0.0122262	8.67688e-34	6.07077	6.07077	1.86959	9.73934	6.54188	6.54188	3.04386	10.199	0.135561	-0.47111	NM_021954 // RefSeq // Homo sapiens gap junction protein, alpha 3, 46kDa (connex	NM_021954
4	3413160	XM_001126701 // RefSeq // PREDICTED: Homo sapiens hypothetical protein LOC728148	XM_001126701 // Hs.380659 // testis; bladder; salivary gland	chr12	+	46094793	46100228	20	XM_001126701 // LOC728148 // hypothetical protein LOC728148 // 12q13.11 // 72814	0.601628	1.41917e-19	0.0122587	6.60006e-05	2.90012	2.90012	1.46653	5.02785	3.03326	3.03326	1.36389	6.04023	0.601628	-0.133133	XM_001126701 // RefSeq // PREDICTED: Homo sapiens hypothetical protein LOC728148	XM_001126701
48	3450775	NM_017641 // RefSeq // Homo sapiens kinesin family member 21A (KIF21A), mRNA. //	NM_017641 // Hs.374201 // brain; uncharacterized tissue; whole brain; colon; emb	chr12	-	37973300	38139963	258	NM_017641 // KIF21A // kinesin family member 21A // 12q12 // 55605 /// CR749623	0.488064	0	0.0122628	0	7.85083	7.85083	1.7665	11.4284	8.10313	8.10313	1.82964	11.9647	0.488064	-0.2523	NM_017641 // RefSeq // Homo sapiens kinesin family member 21A (KIF21A), mRNA. //	NM_017641
7	3722535	NM_001661 // RefSeq // Homo sapiens ADP-ribosylation factor-like 4D (ARL4D), mRN	NM_001661 // Hs.183153 // eye; mixed; lung; brain; whole brain; uncharacterized	chr17	+	38831873	38848324	34	NM_001661 // ARL4D // ADP-ribosylation factor-like 4D // 17q12-q21 // 379	0.101873	5.8275e-27	0.0122716	6.48611e-10	4.63936	4.63936	2.10238	7.42414	5.28778	5.28778	1.64766	8.22977	0.101873	-0.648414	NM_001661 // RefSeq // Homo sapiens ADP-ribosylation factor-like 4D (ARL4D), mRN	NM_001661
28	2905664	NM_021943 // RefSeq // Homo sapiens zinc finger, AN1-type domain 3 (ZFAND3), mRN	NM_021943 // Hs.36959 // prostate; brain; mixed; testis; mammary gland; liver; u	chr6	+	37895285	38231400	499	NM_021943 // ZFAND3 // zinc finger, AN1-type domain 3 // 6pter-p22.3 // 60685 //	0.284045	0	0.0122803	0	6.1704	6.1704	1.44576	9.34657	6.52271	6.52271	0.808505	9.69172	0.284045	-0.352308	NM_021943 // RefSeq // Homo sapiens zinc finger, AN1-type domain 3 (ZFAND3), mRN	NM_021943
7	2956858	GENSCAN00000053067 // ENSEMBL Prediction // cdna:Genscan chromosome:NCBI36:6:51	NM_152857 // Hs.446091 // lung; mixed; brain; placenta; blood; colon; prostate;	chr6	-	51365658	51383294	47	NM_152857 // WTAP // Wilms tumor 1 associated protein // 6q25-q27 // 9589 /// XR	0.274082	3.54874e-17	0.0123408	1.21633e-07	2.69813	2.69813	1.21501	4.79182	2.98625	2.98625	1.09121	5.17132	0.274082	-0.288117	GENSCAN00000053067 // ENSEMBL Prediction // cdna:Genscan chromosome:NCBI36:6:51	GENSCAN00000053067
2	3598329	XR_017131 // RefSeq // PREDICTED: Homo sapiens similar to cell division cycle 2-	XR_017131 // Hs.646506 // --- /// XR_019068 // Hs.646506 // ---	chr15	+	63381343	63381801	8	XR_017131 // LOC390596 // similar to cell division cycle 2-like 1 (PITSLRE prote	0.390234	4.53054e-14	0.0124028	3.0962e-05	4.61441	4.61441	2.15512	6.71725	4.88483	4.88483	2.78861	7.20829	0.390234	-0.270425	XR_017131 // RefSeq // PREDICTED: Homo sapiens similar to cell division cycle 2-	XR_017131
3	2539318	XR_018632 // RefSeq // PREDICTED: Homo sapiens similar to CDK2 (cyclin-dependent	XR_018632 // Hs.646825 // eye; adipose tissue /// XR_016655 // Hs.646825 // eye;	chr2	-	7379991	7382649	21	XR_018632 // LOC644232 // similar to CDK2 (cyclin-dependent kinase 2)-associated	0.453456	3.78954e-12	0.0124052	4.12569e-05	5.05507	5.05507	2.4035	7.26029	5.32336	5.32336	3.61939	7.48244	0.453456	-0.268285	XR_018632 // RefSeq // PREDICTED: Homo sapiens similar to CDK2 (cyclin-dependent	XR_018632
10	2950771	NM_207497 // RefSeq // Homo sapiens FLJ43752 protein (FLJ43752), mRNA. // chr6 /	NM_207497 // Hs.520075 // pancreas; testis; brain	chr6	-	33661871	33669091	37	NM_207497 // FLJ43752 // FLJ43752 protein // 6p21.31 // 401253	0.319717	3.76119e-34	0.0124754	3.84812e-18	5.14062	5.14062	2.52349	7.48283	5.45972	5.45972	3.07251	7.9086	0.319717	-0.319098	NM_207497 // RefSeq // Homo sapiens FLJ43752 protein (FLJ43752), mRNA. // chr6 /	NM_207497
14	3736965	NM_178543 // RefSeq // Homo sapiens ectonucleotide pyrophosphatase/phosphodieste	NM_178543 // Hs.114084 // liver; mixed; kidney; stomach /// XR_018417 // Hs.6473	chr17	+	75319286	75364340	72	NM_178543 // ENPP7 // ectonucleotide pyrophosphatase/phosphodiesterase 7 // 17q2	0.260222	0	0.0124883	4.28464e-31	4.98333	4.98333	1.78083	8.10789	5.36446	5.36446	2.14171	8.71435	0.260222	-0.381129	NM_178543 // RefSeq // Homo sapiens ectonucleotide pyrophosphatase/phosphodieste	NM_178543
35	3954331	NM_003935 // RefSeq // Homo sapiens topoisomerase (DNA) III beta (TOP3B), mRNA.	NM_003935 // Hs.436401 // brain; uncharacterized tissue; thymus; whole brain; em	chr22	-	20641403	20667210	166	NM_003935 // TOP3B // topoisomerase (DNA) III beta // 22q11.22 // 8940 /// AK096	0.116274	0	0.0126539	0	5.3458	5.3458	2.07691	8.89684	5.87639	5.87639	2.34641	9.29085	0.116274	-0.53059	NM_003935 // RefSeq // Homo sapiens topoisomerase (DNA) III beta (TOP3B), mRNA.	NM_003935
30	3722917	NM_002087 // RefSeq // Homo sapiens granulin (GRN), mRNA. // chr17 // 100 // 65	NM_002087 // Hs.514220 // uncharacterized tissue; brain; connective tissue; plac	chr17	+	39778027	39786603	132	NM_002087 // GRN // granulin // 17q21.32 // 2896	0.110668	0	0.0126872	0	6.57116	6.57116	2.81683	10.3683	7.23365	7.23365	2.64868	11.4731	0.110668	-0.662483	NM_002087 // RefSeq // Homo sapiens granulin (GRN), mRNA. // chr17 // 100 // 65	NM_002087
39	2635906	NM_145753 // RefSeq // Homo sapiens pleckstrin homology-like domain, family B, m	NM_145753 // Hs.477114 // placenta; liver; mixed; cranial nerve; testis; uterus;	chr3	+	113085500	113179208	265	NM_145753 // PHLDB2 // pleckstrin homology-like domain, family B, member 2 // 3q	0.125258	0	0.0126953	0	4.38125	4.38125	1.19146	7.23804	4.8721	4.8721	1.23456	7.89783	0.125258	-0.490851	NM_145753 // RefSeq // Homo sapiens pleckstrin homology-like domain, family B, m	NM_145753
10	2674242	NM_001664 // RefSeq // Homo sapiens ras homolog gene family, member A (RHOA), mR	NM_001664 // Hs.247077 // brain; lung; prostate; placenta; mixed; uterus; connec	chr3	-	49371587	49424514	505	NM_001664 // RHOA // ras homolog gene family, member A // 3p21.3 // 387 /// NM_1	0.179047	0	0.0127212	7.94084e-14	7.86754	7.86754	1.75298	11.6509	8.31344	8.31344	2.47595	11.9498	0.179047	-0.445904	NM_001664 // RefSeq // Homo sapiens ras homolog gene family, member A (RHOA), mR	NM_001664
77	3633890	NM_020843 // RefSeq // Homo sapiens zinc finger protein 291 (ZNF291), mRNA. // c	NM_020843 // Hs.458986 // brain; uncharacterized tissue; testis; whole brain; li	chr15	-	74425536	74984830	513	NM_020843 // ZNF291 // zinc finger protein 291 // 15q24 // 49855 /// BX647285 //	0.311776	0	0.0127436	0	5.11501	5.11501	1.15263	9.75823	5.43958	5.43958	0.808505	9.94215	0.311776	-0.324572	NM_020843 // RefSeq // Homo sapiens zinc finger protein 291 (ZNF291), mRNA. // c	NM_020843
3	3184204	NM_006687 // RefSeq // Homo sapiens actin-like 7A (ACTL7A), mRNA. // chr9 // 100	NM_006687 // Hs.123530 // testis; brain; mixed; uncharacterized tissue	chr9	+	110664356	110665852	12	NM_006687 // ACTL7A // actin-like 7A // 9q31 // 10881	0.0954316	0.137889	0.0129164	0.000274582	3.55033	3.55033	2.42687	4.52745	4.09553	4.09553	2.70426	5.5731	0.0954316	-0.545195	NM_006687 // RefSeq // Homo sapiens actin-like 7A (ACTL7A), mRNA. // chr9 // 100	NM_006687
4	3477967	NM_145648 // RefSeq // Homo sapiens solute carrier family 15, member 4 (SLC15A4)	NM_145648 // Hs.507260 // mixed; brain; uncharacterized tissue; lung; uterus; te	chr12	-	127862842	127865238	19	NM_145648 // SLC15A4 // solute carrier family 15, member 4 // 12q24.32 // 121260	0.073673	9.76457e-27	0.0129643	8.77632e-08	6.08555	6.08555	2.79281	9.8737	6.7769	6.7769	4.34887	10.4584	0.073673	-0.691347	NM_145648 // RefSeq // Homo sapiens solute carrier family 15, member 4 (SLC15A4)	NM_145648
29	3775686	NM_001037334 // RefSeq // Homo sapiens ubiquitin specific peptidase 14 (tRNA-gua	NM_001037334 // Hs.464416 // brain; uncharacterized tissue; liver; whole brain;	chr18	+	148498	204716	147	NM_001037334 // USP14 // ubiquitin specific peptidase 14 (tRNA-guanine transglyc	0.233347	0	0.0129762	0	6.23253	6.23253	1.4095	11.7202	6.68946	6.68946	1.25605	11.8921	0.233347	-0.456929	NM_001037334 // RefSeq // Homo sapiens ubiquitin specific peptidase 14 (tRNA-gua	NM_001037334
3	2590557	XR_015439 // RefSeq // PREDICTED: Homo sapiens similar to Keratin, type I cytosk	XR_015439 // Hs.647846 // prostate; colon; liver	chr2	-	182534184	182535504	44	XR_015439 // LOC729050 // similar to Keratin, type I cytoskeletal 18 (Cytokerati	0.521213	2.84087e-09	0.0129969	0.252466	4.71675	4.71675	1.45973	6.69247	4.91723	4.91723	0.906502	7.37669	0.521213	-0.200481	XR_015439 // RefSeq // PREDICTED: Homo sapiens similar to Keratin, type I cytosk	XR_015439
22	3778410	NM_006788 // RefSeq // Homo sapiens ralA binding protein 1 (RALBP1), mRNA. // ch	NM_006788 // Hs.528993 // cranial nerve; placenta; muscle; mouth; uncharacterize	chr18	+	9464539	9530776	161	NM_006788 // RALBP1 // ralA binding protein 1 // 18p11.3 // 10928 /// L42542 //	0.212505	0	0.0130058	1.80907e-36	6.65937	6.65937	1.50859	13.5976	7.04865	7.04865	1.34698	13.7286	0.212505	-0.389281	NM_006788 // RefSeq // Homo sapiens ralA binding protein 1 (RALBP1), mRNA. // ch	NM_006788
96	3128411	NM_022659 // RefSeq // Homo sapiens early B-cell factor 2 (EBF2), mRNA. // chr8	NM_022659 // Hs.584959 // whole brain; pancreas; whole body; thyroid; uncharacte	chr8	-	25476188	25994526	565	NM_022659 // EBF2 // early B-cell factor 2 // 8p21.2 // 64641 /// AY700779 // EB	0.154739	0	0.0131033	0	4.02688	4.02688	0.99728	7.88702	4.41453	4.41453	1.06289	8.03362	0.154739	-0.387651	NM_022659 // RefSeq // Homo sapiens early B-cell factor 2 (EBF2), mRNA. // chr8	NM_022659
16	2402861	NM_018066 // RefSeq // Homo sapiens ATP binding domain 1 family, member B (ATPBD	NM_018066 // Hs.14333 // skin; brain; lung; mixed; testis; liver; kidney; muscle	chr1	-	27089575	27099520	83	NM_018066 // ATPBD1B // ATP binding domain 1 family, member B // 1p36.11 // 5470	0.197115	0	0.0131573	1.30756e-32	5.31703	5.31703	2.23217	7.52899	5.708	5.708	1.54703	8.07757	0.197115	-0.390972	NM_018066 // RefSeq // Homo sapiens ATP binding domain 1 family, member B (ATPBD	NM_018066
12	3758790	ENST00000206380 // ENSEMBL Transcript // transmembrane protein 101 (TMEM101), mR	NM_032376 // Hs.514211 // uncharacterized tissue; brain; prostate; cervix; mixed	chr17	-	39444085	39456158	62	NM_032376 // TMEM101 // transmembrane protein 101 // 17q21.31 // 84336	0.150808	0	0.0131587	4.32741e-28	5.27479	5.27479	1.29259	8.46985	5.77411	5.77411	0.714908	8.91849	0.150808	-0.499328	ENST00000206380 // ENSEMBL Transcript // transmembrane protein 101 (TMEM101), mR	ENST00000206380
9	2333777	NM_173484 // RefSeq // Homo sapiens Kruppel-like factor 17 (KLF17), mRNA. // chr	NM_173484 // Hs.567674 // testis; liver; mixed; adrenal gland; thyroid; lung; ki	chr1	+	44357109	44373389	48	NM_173484 // KLF17 // Kruppel-like factor 17 // 1p34.1 // 128209 /// BC035408 //	0.225146	0	0.0131908	3.38073e-12	4.27052	4.27052	1.04429	8.38775	4.57438	4.57438	2.32537	8.62764	0.225146	-0.303865	NM_173484 // RefSeq // Homo sapiens Kruppel-like factor 17 (KLF17), mRNA. // chr	NM_173484
42	4009506	NM_015107 // RefSeq // Homo sapiens PHD finger protein 8 (PHF8), mRNA. // chrX /	NM_015107 // Hs.133352 // testis; mixed; prostate; placenta; muscle; brain; mout	chrX	-	53979849	54088124	193	NM_015107 // PHF8 // PHD finger protein 8 // Xp11.22 // 23133 /// BC042108 // PH	0.267215	0	0.0132188	0	5.63077	5.63077	1.70478	9.07963	5.99469	5.99469	1.33786	9.81533	0.267215	-0.363922	NM_015107 // RefSeq // Homo sapiens PHD finger protein 8 (PHF8), mRNA. // chrX /	NM_015107
47	3700158	NM_199355 // RefSeq // Homo sapiens ADAM metallopeptidase with thrombospondin ty	NM_199355 // Hs.188746 // uncharacterized tissue; lung; brain; placenta; whole b	chr16	-	75834760	76026519	250	NM_199355 // ADAMTS18 // ADAM metallopeptidase with thrombospondin type 1 motif,	0.128151	0	0.0132194	0	4.22246	4.22246	1.27517	10.6399	4.86519	4.86519	1.53238	10.981	0.128151	-0.642729	NM_199355 // RefSeq // Homo sapiens ADAM metallopeptidase with thrombospondin ty	NM_199355
4	3527325	NM_001005483 // RefSeq // Homo sapiens olfactory receptor, family 4, subfamily K	NM_001005483 // Hs.554585 // eye	chr14	+	19458573	19459553	22	NM_001005483 // OR4K5 // olfactory receptor, family 4, subfamily K, member 5 //	0.221997	2.29391e-15	0.0132648	0.000116096	3.13367	3.13367	1.57867	4.84576	3.49251	3.49251	1.29335	5.67422	0.221997	-0.358849	NM_001005483 // RefSeq // Homo sapiens olfactory receptor, family 4, subfamily K	NM_001005483
12	3367580	NM_002233 // RefSeq // Homo sapiens potassium voltage-gated channel, shaker-rela	NM_002233 // Hs.592002 // brain; lung; uncharacterized tissue; lymph node	chr11	-	29947749	29995089	66	NM_002233 // KCNA4 // potassium voltage-gated channel, shaker-related subfamily,	0.262814	0	0.0133355	2.10385e-26	5.97491	5.97491	1.81229	8.62413	6.38977	6.38977	1.753	9.17528	0.262814	-0.414856	NM_002233 // RefSeq // Homo sapiens potassium voltage-gated channel, shaker-rela	NM_002233
46	3211579	NM_005077 // RefSeq // Homo sapiens transducin-like enhancer of split 1 (E(sp1)	NM_005077 // Hs.197320 // ascites; brain; mixed; trachea; lung; dorsal root gang	chr9	-	83388423	83494372	324	NM_005077 // TLE1 // transducin-like enhancer of split 1 (E(sp1) homolog, Drosop	0.193272	0	0.0135006	0	5.15669	5.15669	1.05195	9.46333	5.62234	5.62234	1.1882	9.54447	0.193272	-0.465645	NM_005077 // RefSeq // Homo sapiens transducin-like enhancer of split 1 (E(sp1)	NM_005077
51	3339423	NM_001567 // RefSeq // Homo sapiens inositol polyphosphate phosphatase-like 1 (I	NM_001567 // Hs.523875 // lung; uncharacterized tissue; placenta; embryonic tiss	chr11	+	71611910	71627796	223	NM_001567 // INPPL1 // inositol polyphosphate phosphatase-like 1 // 11q23 // 363	0.146232	0	0.0135034	0	6.40774	6.40774	2.0699	12.2331	6.88987	6.88987	2.6111	12.5512	0.146232	-0.482124	NM_001567 // RefSeq // Homo sapiens inositol polyphosphate phosphatase-like 1 (I	NM_001567
26	3918959	NM_032476 // RefSeq // Homo sapiens mitochondrial ribosomal protein S6 (MRPS6),	NM_032476 // Hs.302742 // brain; uterus; whole brain; kidney; lung; mixed; testi	chr21	+	34244291	34437930	260	NM_032476 // MRPS6 // mitochondrial ribosomal protein S6 // 21q21.3-q22.1 // 649	0.135796	0	0.0135273	0	4.97036	4.97036	1.26866	10.0468	5.41852	5.41852	1.29335	10.5516	0.135796	-0.448155	NM_032476 // RefSeq // Homo sapiens mitochondrial ribosomal protein S6 (MRPS6),	NM_032476
15	2434319	NM_030920 // RefSeq // Homo sapiens acidic (leucine-rich) nuclear phosphoprotein	NM_030920 // Hs.603000 // brain; mouth; pharynx; thymus; testis; pancreas; adren	chr1	-	148457347	148481491	61	NM_030920 // ANP32E // acidic (leucine-rich) nuclear phosphoprotein 32 family, m	0.783149	0	0.0135584	1.40092e-28	6.1354	6.1354	0.841935	9.28715	6.23347	6.23347	0.808505	9.5572	0.783149	-0.0980735	NM_030920 // RefSeq // Homo sapiens acidic (leucine-rich) nuclear phosphoprotein	NM_030920
29	2647742	NM_032025 // RefSeq // Homo sapiens eukaryotic translation initiation factor 2A,	NM_032025 // Hs.378808 // brain; connective tissue; stomach; testis; vascular; u	chr3	+	151747168	151788822	175	NM_032025 // EIF2A // eukaryotic translation initiation factor 2A, 65kDa // 3q25	0.514055	0	0.0135684	0	5.52109	5.52109	1.4039	10.3456	5.73354	5.73354	1.32644	10.8473	0.514055	-0.212447	NM_032025 // RefSeq // Homo sapiens eukaryotic translation initiation factor 2A,	NM_032025
20	3318666	NM_000543 // RefSeq // Homo sapiens sphingomyelin phosphodiesterase 1, acid lyso	NM_000543 // Hs.498173 // brain; placenta; mixed; adipose tissue; eye; lung; who	chr11	+	6305025	6372789	121	NM_000543 // SMPD1 // sphingomyelin phosphodiesterase 1, acid lysosomal (acid sp	0.164813	0	0.013632	1.4013e-44	5.2265	5.2265	1.3332	8.99656	5.67326	5.67326	0.982729	10.0617	0.164813	-0.44676	NM_000543 // RefSeq // Homo sapiens sphingomyelin phosphodiesterase 1, acid lyso	NM_000543
17	2784777	XR_016933 // RefSeq // PREDICTED: Homo sapiens hypothetical LOC645841 (LOC645841	XR_016933 // Hs.647998 // brain	chr4	-	126639916	126904973	120	XR_016933 // LOC645841 // hypothetical LOC645841 // 4q28.1 // 645841 /// XR_0181	0.111661	0	0.0136701	2.43829e-15	3.41549	3.41549	1.468	6.45653	3.796	3.796	1.50841	6.95716	0.111661	-0.380511	XR_016933 // RefSeq // PREDICTED: Homo sapiens hypothetical LOC645841 (LOC645841	XR_016933
14	2454343	BX647803 // GenBank // Homo sapiens mRNA; cDNA DKFZp686G0496 (from clone DKFZp68	BX647803 // Hs.632495 // eye; pineal gland; brain; testis; embryonic tissue; unc	chr1	-	209716487	209756689	97	BX647803 // RD3 // retinal degeneration 3 // 1q32.3 // 343035 /// NM_183059 // R	0.116873	0	0.0136849	4.3977e-25	4.61096	4.61096	1.28182	7.79668	5.08017	5.08017	1.99405	7.98381	0.116873	-0.469206	BX647803 // GenBank // Homo sapiens mRNA; cDNA DKFZp686G0496 (from clone DKFZp68	BX647803
48	3437801	NM_004764 // RefSeq // Homo sapiens piwi-like 1 (Drosophila) (PIWIL1), mRNA. //	NM_004764 // Hs.405659 // testis; brain; mixed; eye; muscle; colon; uncharacteri	chr12	+	129229838	129451292	372	NM_004764 // PIWIL1 // piwi-like 1 (Drosophila) // 12q24.33 // 9271	0.0960983	0	0.0136999	0	3.72194	3.72194	0.987578	9.48845	4.18137	4.18137	1.00914	9.98279	0.0960983	-0.459429	NM_004764 // RefSeq // Homo sapiens piwi-like 1 (Drosophila) (PIWIL1), mRNA. //	NM_004764
42	2854445	NM_001343 // RefSeq // Homo sapiens disabled homolog 2, mitogen-responsive phosp	NM_001343 // Hs.481980 // placenta; liver; brain; kidney; skin; uncharacterized	chr5	-	39407558	39461072	244	NM_001343 // DAB2 // disabled homolog 2, mitogen-responsive phosphoprotein (Dros	0.181875	0	0.0137274	0	4.51901	4.51901	0.91833	9.23796	5.03097	5.03097	1.08411	9.84877	0.181875	-0.511965	NM_001343 // RefSeq // Homo sapiens disabled homolog 2, mitogen-responsive phosp	NM_001343
94	3494137	NM_005358 // RefSeq // Homo sapiens LIM domain 7 (LMO7), mRNA. // chr13 // 100 /	NM_005358 // Hs.207631 // liver; brain; colon; vascular; adrenal gland; small in	chr13	+	75092571	75566974	599	NM_005358 // LMO7 // LIM domain 7 // 13q22.2 // 4008 /// AB020665 // LMO7 // LIM	0.470508	0	0.0137876	0	5.43847	5.43847	1.073	10.2995	5.67722	5.67722	1.22159	10.7861	0.470508	-0.238747	NM_005358 // RefSeq // Homo sapiens LIM domain 7 (LMO7), mRNA. // chr13 // 100 /	NM_005358
50	3228279	AK093446 // GenBank // Homo sapiens cDNA FLJ36127 fis, clone TESTI2024446, weakl	AK093446 // Hs.421340 // testis; brain; mammary gland; uncharacterized tissue; c	chr9	-	134590792	134744019	341	AK093446 // C9orf98 // chromosome 9 open reading frame 98 // 9q34.13 // 158067 /	0.22418	0	0.0137916	0	4.93266	4.93266	1.25975	8.7277	5.29553	5.29553	1.01885	9.00107	0.22418	-0.362873	AK093446 // GenBank // Homo sapiens cDNA FLJ36127 fis, clone TESTI2024446, weakl	AK093446
9	3868891	NM_022046 // RefSeq // Homo sapiens kallikrein-related peptidase 14 (KLK14), mRN	NM_022046 // Hs.283925 // uncharacterized tissue; lung /// AF283670 // Hs.283925	chr19	-	56272386	56279314	35	NM_022046 // KLK14 // kallikrein-related peptidase 14 // 19q13.3-q13.4 // 43847	0.0613099	6.11113e-20	0.0138346	3.69314e-10	4.80242	4.80242	2.07713	7.23574	5.45819	5.45819	1.7929	7.64293	0.0613099	-0.655768	NM_022046 // RefSeq // Homo sapiens kallikrein-related peptidase 14 (KLK14), mRN	NM_022046
70	2579572	NM_014795 // RefSeq // Homo sapiens zinc finger homeobox 1b (ZFHX1B), mRNA. // c	NM_014795 // Hs.34871 // brain; whole brain; mixed; colon; uncharacterized tissu	chr2	-	144861732	145002177	574	NM_014795 // ZFHX1B // zinc finger homeobox 1b // 2q22 // 9839 /// BC060819 // Z	0.301861	0	0.013841	0	6.00551	6.00551	1.32626	10.9079	6.33992	6.33992	0.914437	11.4863	0.301861	-0.334415	NM_014795 // RefSeq // Homo sapiens zinc finger homeobox 1b (ZFHX1B), mRNA. // c	NM_014795
23	4026624	NM_001039582 // RefSeq // Homo sapiens pregnancy upregulated non-ubiquitously ex	NM_001039582 // Hs.436667 // brain; placenta; embryonic tissue; whole brain; ute	chrX	-	152588382	152607636	125	NM_001039582 // PNCK // pregnancy upregulated non-ubiquitously expressed CaM kin	0.107631	0	0.013856	0	6.726	6.726	2.40443	10.1616	7.343	7.343	1.98006	10.7873	0.107631	-0.616995	NM_001039582 // RefSeq // Homo sapiens pregnancy upregulated non-ubiquitously ex	NM_001039582
21	3383081	NM_033547 // RefSeq // Homo sapiens integrator complex subunit 4 (INTS4), mRNA.	NM_033547 // Hs.533723 // brain; colon; mixed; placenta; uncharacterized tissue;	chr11	-	77267466	77383438	186	NM_033547 // INTS4 // integrator complex subunit 4 // 11q14.1 // 92105 /// BC009	0.326402	0	0.0138605	0	5.27721	5.27721	1.63347	8.98376	5.65715	5.65715	1.97237	9.19973	0.326402	-0.379934	NM_033547 // RefSeq // Homo sapiens integrator complex subunit 4 (INTS4), mRNA.	NM_033547
57	3399545	NM_015261 // RefSeq // Homo sapiens non-SMC condensin II complex, subunit D3 (NC	NM_015261 // Hs.438550 // prostate; pancreas; brain; uncharacterized tissue; eye	chr11	-	133523648	133600390	266	NM_015261 // NCAPD3 // non-SMC condensin II complex, subunit D3 // 11q25 // 2331	0.176305	0	0.0139539	0	5.34885	5.34885	1.42615	8.37449	5.82974	5.82974	1.75645	9.08482	0.176305	-0.480888	NM_015261 // RefSeq // Homo sapiens non-SMC condensin II complex, subunit D3 (NC	NM_015261
6	4026206	NM_005367 // RefSeq // Homo sapiens melanoma antigen family A, 12 (MAGEA12), mRN	NM_005362 // Hs.417816 // skin; placenta; prostate; other; lung; uterus; pancrea	chrX	-	151646632	151664138	53	NM_005367 // MAGEA12 // melanoma antigen family A, 12 // Xq28 // 4111 /// NM_005	0.126138	2.20549e-27	0.0139616	0.0085651	3.75078	3.75078	1.25624	7.32414	4.08335	4.08335	1.50987	7.60527	0.126138	-0.332567	NM_005367 // RefSeq // Homo sapiens melanoma antigen family A, 12 (MAGEA12), mRN	NM_005367
33	3944826	NM_018957 // RefSeq // Homo sapiens SH3-domain binding protein 1 (SH3BP1), mRNA.	NM_018957 // Hs.601143 // uncharacterized tissue; brain; uterus; placenta; mixed	chr22	+	36360617	36454205	163	NM_018957 // SH3BP1 // SH3-domain binding protein 1 // 22q13.1 // 23616 /// AK12	0.0890456	0	0.0139803	0	5.18762	5.18762	1.04111	8.31259	5.6803	5.6803	1.19236	8.67101	0.0890456	-0.492683	NM_018957 // RefSeq // Homo sapiens SH3-domain binding protein 1 (SH3BP1), mRNA.	NM_018957
10	3815685	AK000647 // GenBank // Homo sapiens cDNA FLJ20640 fis, clone KAT02911. // chr19	AK000647 // Hs.591383 // uncharacterized tissue; embryonic tissue; skin; pancrea	chr19	+	1226540	1230208	44	AK000647 // C19orf24 // chromosome 19 open reading frame 24 // 19p13.3 // 55009	0.0772103	0	0.014069	1.22533e-26	6.59524	6.59524	4.25382	9.3381	7.08809	7.08809	3.77142	9.8729	0.0772103	-0.492842	AK000647 // GenBank // Homo sapiens cDNA FLJ20640 fis, clone KAT02911. // chr19	AK000647
2	3928522	NM_181607 // RefSeq // Homo sapiens keratin associated protein 19-1 (KRTAP19-1),	NM_181607 // Hs.61552 // heart; mixed /// AB096943 // Hs.61552 // heart; mixed	chr21	-	30773889	30774507	8	NM_181607 // KRTAP19-1 // keratin associated protein 19-1 // 21q22.1 // 337882 /	0.467025	0.000201036	0.0140787	0.0110591	3.42431	3.42431	2.64918	4.68918	3.63438	3.63438	2.03348	5.20596	0.467025	-0.210072	NM_181607 // RefSeq // Homo sapiens keratin associated protein 19-1 (KRTAP19-1),	NM_181607
22	3956290	NM_012399 // RefSeq // Homo sapiens phosphatidylinositol transfer protein, beta	NM_012399 // Hs.7370 // brain; placenta; uterus; mixed; whole brain; testis; mus	chr22	-	26577440	26645487	178	NM_012399 // PITPNB // phosphatidylinositol transfer protein, beta // 22q12.1 //	0.273909	0	0.014087	0	6.5478	6.5478	1.00297	9.89726	6.88466	6.88466	1.74193	10.534	0.273909	-0.336863	NM_012399 // RefSeq // Homo sapiens phosphatidylinositol transfer protein, beta	NM_012399
2	3869914	BC032590 // GenBank // Homo sapiens cDNA clone IMAGE:5502691, containing frame-s	BC032590 // Hs.270435 // placenta; uncharacterized tissue; mammary gland; thyroi	chr19	-	58057564	58057926	15	BC032590 // ZNF702 // zinc finger protein 702 // 19q13.41 // 79986 /// AL833754	0.306628	1.32379e-07	0.014087	0.0716859	3.86911	3.86911	2.09442	6.44238	4.19671	4.19671	2.8664	5.96626	0.306628	-0.327603	BC032590 // GenBank // Homo sapiens cDNA clone IMAGE:5502691, containing frame-s	BC032590
4	3880618	NR_002185 // RefSeq // Homo sapiens olfactory receptor, family 7, subfamily E, m	NR_002185 // Hs.327033 // placenta; trachea	chr20	+	24859294	24861780	23	NR_002185 // OR7E91P // olfactory receptor, family 7, subfamily E, member 91 pse	0.0467272	1.94891e-19	0.014115	2.64827e-05	3.01549	3.01549	1.20809	5.34613	3.58681	3.58681	1.11118	6.24403	0.0467272	-0.571317	NR_002185 // RefSeq // Homo sapiens olfactory receptor, family 7, subfamily E, m	NR_002185
5	3945040	NM_003614 // RefSeq // Homo sapiens galanin receptor 3 (GALR3), mRNA. // chr22 /	NM_003614 // Hs.158353 // uncharacterized tissue; ovary; brain; eye	chr22	+	36549161	36551448	25	NM_003614 // GALR3 // galanin receptor 3 // 22q13.1 // 8484	0.197501	4.91225e-12	0.0141597	2.06606e-15	6.8933	6.8933	5.26013	8.08605	7.26792	7.26792	5.57136	8.55741	0.197501	-0.374625	NM_003614 // RefSeq // Homo sapiens galanin receptor 3 (GALR3), mRNA. // chr22 /	NM_003614
32	3562746	NM_018353 // RefSeq // Homo sapiens chromosome 14 open reading frame 106 (C14orf	NM_018353 // Hs.437941 // embryonic tissue; mixed; spleen; mouth; adrenal gland;	chr14	-	44742148	44792659	190	NM_018353 // C14orf106 // chromosome 14 open reading frame 106 // 14q21.3 // 553	0.410169	0	0.0142118	1.8961e-41	3.68895	3.68895	0.971295	6.36945	3.91544	3.91544	0.714908	6.95725	0.410169	-0.226491	NM_018353 // RefSeq // Homo sapiens chromosome 14 open reading frame 106 (C14orf	NM_018353
38	3174816	NM_000700 // RefSeq // Homo sapiens annexin A1 (ANXA1), mRNA. // chr9 // 100 //	NM_000700 // Hs.494173 // placenta; liver; uterus; lung; brain; bone; pharynx; a	chr9	+	74914324	74983394	161	NM_000700 // ANXA1 // annexin A1 // 9q12-q21.2|9q12-q21.2 // 301 /// AK074480 //	0.109765	0	0.0142632	0	3.58962	3.58962	0.904954	9.2856	4.06315	4.06315	1.07225	10.1913	0.109765	-0.473528	NM_000700 // RefSeq // Homo sapiens annexin A1 (ANXA1), mRNA. // chr9 // 100 //	NM_000700
47	3085403	NM_012331 // RefSeq // Homo sapiens methionine sulfoxide reductase A (MSRA), mRN	NM_012331 // Hs.490981 // whole brain; brain; mixed; kidney; colon; amniotic flu	chr8	+	9949135	10323801	405	NM_012331 // MSRA // methionine sulfoxide reductase A // 8p23.1 // 4482 /// BC04	0.418889	0	0.0143828	0	5.88149	5.88149	0.940765	10.3	6.15925	6.15925	1.71318	10.3084	0.418889	-0.277766	NM_012331 // RefSeq // Homo sapiens methionine sulfoxide reductase A (MSRA), mRN	NM_012331
40	2365675	NM_002697 // RefSeq // Homo sapiens POU domain, class 2, transcription factor 1	NM_002697 // Hs.493649 // brain; uncharacterized tissue; testis; mixed; uterus;	chr1	+	165456757	165652851	324	NM_002697 // POU2F1 // POU domain, class 2, transcription factor 1 // 1q22-q23 /	0.269631	0	0.0144295	0	5.73564	5.73564	1.53295	9.69508	6.13106	6.13106	1.46919	9.81635	0.269631	-0.395422	NM_002697 // RefSeq // Homo sapiens POU domain, class 2, transcription factor 1	NM_002697
12	4024420	NM_012317 // RefSeq // Homo sapiens leucine zipper, down-regulated in cancer 1 (	NM_012317 // Hs.45231 // brain; mixed; vascular; uncharacterized tissue; lung; c	chrX	-	139964166	140098979	96	NM_012317 // LDOC1 // leucine zipper, down-regulated in cancer 1 // Xq27 // 2364	0.128214	0	0.0144318	1.4013e-45	7.8132	7.8132	2.46591	11.3768	8.53761	8.53761	3.2478	12.0112	0.128214	-0.724405	NM_012317 // RefSeq // Homo sapiens leucine zipper, down-regulated in cancer 1 (	NM_012317
3	3188205	NM_001005234 // RefSeq // Homo sapiens olfactory receptor, family 1, subfamily L	NM_001005234 // Hs.626839 // ---	chr9	+	124477230	124478204	10	NM_001005234 // OR1L3 // olfactory receptor, family 1, subfamily L, member 3 //	0.872588	2.79834e-07	0.0144562	0.000419987	3.05795	3.05795	1.57833	4.46186	3.00362	3.00362	0.969542	5.44304	0.872588	0.0543316	NM_001005234 // RefSeq // Homo sapiens olfactory receptor, family 1, subfamily L	NM_001005234
2	2772103	XR_015381 // RefSeq // PREDICTED: Homo sapiens similar to UDP-glucuronosyltransf	XR_015381 // Hs.646879 // ---	chr4	-	69162914	69163281	8	XR_015381 // LOC728807 // similar to UDP-glucuronosyltransferase 2B15 precursor	0.90021	3.82116e-09	0.0144614	3.98762e-05	5.52769	5.52769	4.34021	6.84779	5.57547	5.57547	3.6409	7.7614	0.90021	-0.047782	XR_015381 // RefSeq // PREDICTED: Homo sapiens similar to UDP-glucuronosyltransf	XR_015381
52	3324321	NM_031418 // RefSeq // Homo sapiens transmembrane protein 16C (TMEM16C), mRNA. /	NM_031418 // Hs.91791 // brain; placenta; whole brain; liver; connective tissue;	chr11	+	26110655	26641411	292	NM_031418 // TMEM16C // transmembrane protein 16C // 11p14.2 // 63982	0.400637	0	0.0144811	0	6.11571	6.11571	0.801196	9.70107	6.37235	6.37235	1.29594	10.3182	0.400637	-0.256641	NM_031418 // RefSeq // Homo sapiens transmembrane protein 16C (TMEM16C), mRNA. /	NM_031418
11	2372719	NM_130782 // RefSeq // Homo sapiens regulator of G-protein signalling 18 (RGS18)	NM_130782 // Hs.440890 // blood; uncharacterized tissue; spleen; bone marrow; br	chr1	+	190353003	190421565	59	NM_130782 // RGS18 // regulator of G-protein signalling 18 // 1q31.2 // 64407	0.110919	0	0.0144847	4.65735e-11	3.5638	3.5638	0.855959	7.10785	4.01512	4.01512	1.19082	7.3106	0.110919	-0.45132	NM_130782 // RefSeq // Homo sapiens regulator of G-protein signalling 18 (RGS18)	NM_130782
4	3144630	XM_374276 // RefSeq // PREDICTED: Homo sapiens hypothetical LOC389676 (LOC389676	XM_374276 // Hs.386711 // mixed; lung /// XM_942972 // Hs.386711 // mixed; lung	chr8	-	94215647	94248235	14	XM_374276 // LOC389676 // hypothetical LOC389676 // 8q22.1 // 389676 /// XM_9429	0.146443	1.2987e-11	0.014573	5.02386e-05	4.6609	4.6609	2.58648	6.59312	5.15309	5.15309	3.07258	7.2141	0.146443	-0.492195	XM_374276 // RefSeq // PREDICTED: Homo sapiens hypothetical LOC389676 (LOC389676	XM_374276
3	3979579	XR_016853 // RefSeq // PREDICTED: Homo sapiens similar to AP-1 complex subunit m	XR_016853 // Hs.648323 // ---	chrX	+	64605781	64606896	14	XR_016853 // LOC645388 // similar to AP-1 complex subunit mu-2 (Adaptor-related	0.215702	4.63112e-08	0.0145921	9.01597e-06	5.8412	5.8412	4.71057	6.99551	6.22601	6.22601	4.60459	7.5222	0.215702	-0.384811	XR_016853 // RefSeq // PREDICTED: Homo sapiens similar to AP-1 complex subunit m	XR_016853
57	3191391	AK093583 // GenBank // Homo sapiens cDNA FLJ36264 fis, clone THYMU2002815, weakl	AK093583 // Hs.32194 // mixed; prostate; colon; cervix; uncharacterized tissue;	chr9	+	132067979	132284780	420	AK093583 // HMCN2 // hemicentin 2 // 9q34.11 // 256158 /// XR_015121 // HMCN2 //	0.149378	0	0.0146266	0	5.65237	5.65237	2.48124	9.76781	6.09776	6.09776	2.74062	9.99036	0.149378	-0.445399	AK093583 // GenBank // Homo sapiens cDNA FLJ36264 fis, clone THYMU2002815, weakl	AK093583
37	3880467	ENST00000376862 // ENSEMBL Transcript // chromosome 20 open reading frame 39 (C2	NM_024893 // Hs.124638 // brain; whole brain; mixed; umbilical cord; pancreas; o	chr20	+	24397835	24615170	299	NM_024893 // C20orf39 // chromosome 20 open reading frame 39 // 20p11.21 // 7995	0.179327	0	0.0146846	0	5.26332	5.26332	1.31639	8.85169	5.74436	5.74436	1.10961	9.11374	0.179327	-0.481036	ENST00000376862 // ENSEMBL Transcript // chromosome 20 open reading frame 39 (C2	ENST00000376862
38	3716259	NM_198529 // RefSeq // Homo sapiens EF-hand calcium binding domain 5 (EFCAB5), t	NM_198529 // Hs.540870 // testis; mixed; whole brain; stomach; mammary gland; br	chr17	+	25280198	25463796	222	NM_198529 // EFCAB5 // EF-hand calcium binding domain 5 // 17q11.2 // 374786 ///	0.471896	0	0.0146922	0	3.59494	3.59494	1.43178	7.58683	3.77527	3.77527	1.46326	8.28166	0.471896	-0.180332	NM_198529 // RefSeq // Homo sapiens EF-hand calcium binding domain 5 (EFCAB5), t	NM_198529
2	2387080	NM_000254 // RefSeq // Homo sapiens 5-methyltetrahydrofolate-homocysteine methyl	NM_000254 // Hs.498187 // mixed; brain; mouth; stomach; muscle; eye; connective	chr1	+	235130892	235133904	12	NM_000254 // MTR // 5-methyltetrahydrofolate-homocysteine methyltransferase // 1	0.456752	3.74972e-05	0.0147081	0.00013753	6.14125	6.14125	5.36732	7.3766	6.45536	6.45536	4.65987	8.20673	0.456752	-0.314108	NM_000254 // RefSeq // Homo sapiens 5-methyltetrahydrofolate-homocysteine methyl	NM_000254
25	2651835	NM_014373 // RefSeq // Homo sapiens G protein-coupled receptor 160 (GPR160), mRN	NM_014373 // Hs.231320 // colon; kidney; uncharacterized tissue; pancreas; mamma	chr3	+	171235368	171285874	157	NM_014373 // GPR160 // G protein-coupled receptor 160 // 3q26.2-q27 // 26996 ///	0.327158	0	0.0147198	1.60176e-39	4.11381	4.11381	0.878213	7.60209	4.40511	4.40511	1.12467	8.18185	0.327158	-0.291303	NM_014373 // RefSeq // Homo sapiens G protein-coupled receptor 160 (GPR160), mRN	NM_014373
33	3310675	NM_152644 // RefSeq // Homo sapiens family with sequence similarity 24, member B	NM_152644 // Hs.114648 // bone; pituitary gland; bone marrow; brain; colon; whol	chr10	-	124581615	124629755	161	NM_152644 // FAM24B // family with sequence similarity 24, member B // 10q26.13	0.145603	0	0.0147772	0	4.33729	4.33729	0.956178	8.10979	4.74936	4.74936	1.01575	8.96729	0.145603	-0.412066	NM_152644 // RefSeq // Homo sapiens family with sequence similarity 24, member B	NM_152644
23	3812385	NM_006566 // RefSeq // Homo sapiens CD226 molecule (CD226), mRNA. // chr18 // 10	NM_006566 // Hs.278285 // brain; whole brain; uncharacterized tissue; mixed; vas	chr18	-	65668820	65779963	144	NM_006566 // CD226 // CD226 molecule // 18q22.3 // 10666	0.327142	0	0.0148302	1.09202e-27	3.76866	3.76866	1.04426	6.67152	4.0352	4.0352	1.2292	6.9141	0.327142	-0.266538	NM_006566 // RefSeq // Homo sapiens CD226 molecule (CD226), mRNA. // chr18 // 10	NM_006566
3	3511158	NM_001743 // RefSeq // Homo sapiens calmodulin 2 (phosphorylase kinase, delta) (	NM_001743 // Hs.643483 // brain; testis; lung; liver; bladder; pancreas; mixed;	chr13	-	40642745	40643346	20	NM_001743 // CALM2 // calmodulin 2 (phosphorylase kinase, delta) // 2p21 // 805	0.0882678	1.09693e-20	0.014835	0.0221492	3.6852	3.6852	1.53099	7.67239	4.10557	4.10557	1.8141	7.84791	0.0882678	-0.420365	NM_001743 // RefSeq // Homo sapiens calmodulin 2 (phosphorylase kinase, delta) (	NM_001743
21	3613338	NM_144599 // RefSeq // Homo sapiens non imprinted in Prader-Willi/Angelman syndr	NM_144599 // Hs.511797 // brain; whole brain; uncharacterized tissue; mammary gl	chr15	-	20594728	20665733	139	NM_144599 // NIPA1 // non imprinted in Prader-Willi/Angelman syndrome 1 // 15q11	0.139404	0	0.0148584	0	6.59983	6.59983	1.11325	11.1814	7.11079	7.11079	1.51123	11.963	0.139404	-0.510965	NM_144599 // RefSeq // Homo sapiens non imprinted in Prader-Willi/Angelman syndr	NM_144599
19	2448382	NM_000963 // RefSeq // Homo sapiens prostaglandin-endoperoxide synthase 2 (prost	NM_000963 // Hs.196384 // blood; vascular; cervix; bone marrow; mixed; prostate;	chr1	-	184907556	184916179	84	NM_000963 // PTGS2 // prostaglandin-endoperoxide synthase 2 (prostaglandin G/H s	0.0923887	0	0.0148833	0	5.14026	5.14026	1.5586	8.77689	6.00503	6.00503	1.34457	9.18276	0.0923887	-0.864777	NM_000963 // RefSeq // Homo sapiens prostaglandin-endoperoxide synthase 2 (prost	NM_000963
2	2624805	NM_018398 // RefSeq // Homo sapiens calcium channel, voltage-dependent, alpha 2/	NM_018398 // Hs.128594 // brain; testis; uncharacterized tissue; embryonic tissu	chr3	+	54281958	54302127	16	NM_018398 // CACNA2D3 // calcium channel, voltage-dependent, alpha 2/delta 3 sub	0.759779	1.99622e-06	0.0149016	0.332195	4.0983	4.0983	2.45763	5.37001	4.16368	4.16368	2.09824	5.60198	0.759779	-0.06538	NM_018398 // RefSeq // Homo sapiens calcium channel, voltage-dependent, alpha 2/	NM_018398
13	2832081	NM_144723 // RefSeq // Homo sapiens zinc finger, matrin type 2 (ZMAT2), mRNA. //	NM_144723 // Hs.350194 // brain; uncharacterized tissue; mixed; other; lung; ski	chr5	+	140059951	140067639	50	NM_144723 // ZMAT2 // zinc finger, matrin type 2 // 5q31.3 // 153527	0.193339	0	0.0149415	6.12049e-17	6.10617	6.10617	1.34981	11.6473	6.45222	6.45222	1.7373	11.6504	0.193339	-0.346051	NM_144723 // RefSeq // Homo sapiens zinc finger, matrin type 2 (ZMAT2), mRNA. //	NM_144723
45	3468103	NM_024312 // RefSeq // Homo sapiens N-acetylglucosamine-1-phosphate transferase,	NM_024312 // Hs.46850 // brain; whole brain; uncharacterized tissue; mixed; adre	chr12	-	100663409	100748880	241	NM_024312 // GNPTAB // N-acetylglucosamine-1-phosphate transferase, alpha and be	0.407865	0	0.0150024	0	6.39318	6.39318	0.84415	10.8189	6.66208	6.66208	0.906502	11.3892	0.407865	-0.268896	NM_024312 // RefSeq // Homo sapiens N-acetylglucosamine-1-phosphate transferase,	NM_024312
4	2834716	XM_001126947 // RefSeq // PREDICTED: Homo sapiens hypothetical protein LOC728237	XM_001126947 // Hs.646663 // adrenal gland	chr5	+	148013551	148099709	36	XM_001126947 // LOC728237 // hypothetical protein LOC728237 // 5q33.1 // 728237	0.130223	1.59145e-25	0.0150509	5.66369e-06	4.00796	4.00796	1.67988	7.79246	4.47842	4.47842	1.83202	7.89608	0.130223	-0.47047	XM_001126947 // RefSeq // PREDICTED: Homo sapiens hypothetical protein LOC728237	XM_001126947
2	3962279	NM_001011708 // RefSeq // Homo sapiens GTP-binding protein 9 (putative) (GTPBP9)	NM_001011708 // Hs.157351 // brain; testis; mixed; connective tissue; uterus; pl	chr22	-	40833306	40835008	32	NM_001011708 // GTPBP9 // GTP-binding protein 9 (putative) // 2q31.1 // 29789 //	0.0550462	1.90714e-10	0.0150695	0.0822851	3.7673	3.7673	0.998552	6.28593	4.39657	4.39657	1.77215	6.80491	0.0550462	-0.629271	NM_001011708 // RefSeq // Homo sapiens GTP-binding protein 9 (putative) (GTPBP9)	NM_001011708
17	3829825	BC030216 // GenBank // Homo sapiens Wilms tumor 1 interacting protein, mRNA (cDN	BC030216 // Hs.585010 // liver; vascular; nerve; stomach; mixed; prostate; uncha	chr19	+	39664523	39683914	84	BC030216 // WTIP // Wilms tumor 1 interacting protein // 19q13.11 // 126374 ///	0.0962818	0	0.015073	0	6.81513	6.81513	2.02833	10.7486	7.40579	7.40579	3.1009	11.0923	0.0962818	-0.59066	BC030216 // GenBank // Homo sapiens Wilms tumor 1 interacting protein, mRNA (cDN	BC030216
49	3764289	NM_004758 // RefSeq // Homo sapiens benzodiazapine receptor (peripheral) associa	NM_004758 // Hs.112499 // brain; lung; whole brain; uncharacterized tissue; embr	chr17	-	53733591	53761250	288	NM_004758 // BZRAP1 // benzodiazapine receptor (peripheral) associated protein 1	0.150556	0	0.0151067	0	6.80933	6.80933	1.15263	11.24	7.24584	7.24584	2.57161	11.245	0.150556	-0.436516	NM_004758 // RefSeq // Homo sapiens benzodiazapine receptor (peripheral) associa	NM_004758
16	2651711	ENST00000340806 // ENSEMBL Transcript // similar to LEThal family member (let-41	XM_293529 // Hs.319484 // mixed; brain; lung; connective tissue	chr3	+	171013250	171038241	70	XM_293529 // LOC344657 // similar to LEThal family member (let-413) // 3q26.2 //	0.236011	0	0.0151149	8.23518e-35	4.02292	4.02292	1.3687	8.99804	4.39842	4.39842	1.411	9.2174	0.236011	-0.3755	ENST00000340806 // ENSEMBL Transcript // similar to LEThal family member (let-41	ENST00000340806
13	3378934	NM_005851 // RefSeq // Homo sapiens CDK2-associated protein 2 (CDK2AP2), mRNA. /	NM_005851 // Hs.523835 // brain; mixed; placenta; uncharacterized tissue; lymph	chr11	-	67030223	67032717	67	NM_005851 // CDK2AP2 // CDK2-associated protein 2 // 11q13 // 10263 /// BC016704	0.170824	0	0.015125	4.20441e-34	6.06673	6.06673	3.4685	8.3829	6.50733	6.50733	3.28264	8.87971	0.170824	-0.440607	NM_005851 // RefSeq // Homo sapiens CDK2-associated protein 2 (CDK2AP2), mRNA. /	NM_005851
10	3885434	AK023614 // GenBank // Homo sapiens cDNA FLJ13552 fis, clone PLACE1007218. // ch	AK023614 // Hs.204945 // placenta; mixed; bone	chr20	+	39008904	39087430	104	AK023614 // LOC149692 // hypothetical protein LOC149692 // 20q12 // 149692	0.117338	1.07486e-36	0.0152611	8.42135e-10	3.32342	3.32342	0.747535	6.06431	3.7597	3.7597	1.0728	6.87202	0.117338	-0.436274	AK023614 // GenBank // Homo sapiens cDNA FLJ13552 fis, clone PLACE1007218. // ch	AK023614
11	3340545	NM_001005 // RefSeq // Homo sapiens ribosomal protein S3 (RPS3), mRNA. // chr11	NM_001005 // Hs.546286 // skin; lung; embryonic tissue; brain; pancreas; eye; ov	chr11	+	74787389	74810981	126	NM_001005 // RPS3 // ribosomal protein S3 // 11q13.3-q13.5 // 6188 /// NR_000025	0.245292	0	0.0152648	1.50044e-18	5.51348	5.51348	1.43118	8.74708	5.8679	5.8679	1.74351	8.7764	0.245292	-0.354419	NM_001005 // RefSeq // Homo sapiens ribosomal protein S3 (RPS3), mRNA. // chr11	NM_001005
5	2633145	NM_001005517 // RefSeq // Homo sapiens olfactory receptor, family 5, subfamily K	NM_001005517 // Hs.554710 // ---	chr3	+	99552436	99556395	25	NM_001005517 // OR5K4 // olfactory receptor, family 5, subfamily K, member 4 //	0.321862	1.44823e-11	0.0152884	0.049167	2.61305	2.61305	1.25817	5.01313	2.81866	2.81866	1.11664	5.13072	0.321862	-0.205604	NM_001005517 // RefSeq // Homo sapiens olfactory receptor, family 5, subfamily K	NM_001005517
28	2360257	NM_000565 // RefSeq // Homo sapiens interleukin 6 receptor (IL6R), transcript va	NM_000565 // Hs.591492 // prostate; placenta; thyroid; kidney; bone marrow; rect	chr1	+	152644293	152708546	135	NM_000565 // IL6R // interleukin 6 receptor // 1q21 // 3570 /// NM_181359 // IL6	0.148582	0	0.0153747	0	5.42819	5.42819	2.44833	8.45368	5.88081	5.88081	2.13213	8.71062	0.148582	-0.452617	NM_000565 // RefSeq // Homo sapiens interleukin 6 receptor (IL6R), transcript va	NM_000565
30	3903836	NM_181466 // RefSeq // Homo sapiens integrin beta 4 binding protein (ITGB4BP), t	NM_181466 // Hs.356273 // lung; brain; skin; mixed; placenta; prostate; pancreas	chr20	-	33276003	33336225	146	NM_181466 // ITGB4BP // integrin beta 4 binding protein // 20q12 // 3692 /// NM_	0.103655	0	0.0153854	0	6.2044	6.2044	1.02675	9.9568	6.7954	6.7954	1.26786	10.5769	0.103655	-0.591005	NM_181466 // RefSeq // Homo sapiens integrin beta 4 binding protein (ITGB4BP), t	NM_181466
21	3589872	NM_033286 // RefSeq // Homo sapiens chromosome 15 open reading frame 23 (C15orf2	NM_033286 // Hs.525796 // testis; embryonic tissue; lung; brain; placenta; mixed	chr15	+	38462214	38476398	90	NM_033286 // C15orf23 // chromosome 15 open reading frame 23 // 15q15.1 // 90417	0.313424	0	0.0154023	1.91057e-34	5.17468	5.17468	1.81818	10.249	5.45873	5.45873	1.90415	10.5752	0.313424	-0.284044	NM_033286 // RefSeq // Homo sapiens chromosome 15 open reading frame 23 (C15orf2	NM_033286
3	3928601	NM_175857 // RefSeq // Homo sapiens keratin associated protein 8-1 (KRTAP8-1), m	NM_175857 // Hs.407655 // mixed	chr21	-	31106887	31107409	12	NM_175857 // KRTAP8-1 // keratin associated protein 8-1 // 21q22.1 // 337879	0.250969	5.71283e-18	0.0154341	1.65953e-05	4.77125	4.77125	2.55465	6.97867	5.12814	5.12814	2.34297	7.45164	0.250969	-0.356884	NM_175857 // RefSeq // Homo sapiens keratin associated protein 8-1 (KRTAP8-1), m	NM_175857
3	2522416	NM_001159 // RefSeq // Homo sapiens aldehyde oxidase 1 (AOX1), mRNA. // chr2 //	NM_001159 // Hs.406238 // liver; uncharacterized tissue; cranial nerve; adrenal	chr2	+	201337420	201337797	10	NM_001159 // AOX1 // aldehyde oxidase 1 // 2q33 // 316 /// NR_001557 // AOX2 //	0.409499	0.000847346	0.015464	0.00049776	2.38452	2.38452	1.28246	3.68172	2.66022	2.66022	1.35095	4.08478	0.409499	-0.275707	NM_001159 // RefSeq // Homo sapiens aldehyde oxidase 1 (AOX1), mRNA. // chr2 //	NM_001159
22	3951190	NM_013310 // RefSeq // Homo sapiens chromosome 2 open reading frame 27 (C2orf27)	NM_013310 // Hs.469971 // brain; vascular; kidney; mammary gland; whole brain; l	chr22	-	14480515	14573036	221	NM_013310 // C2orf27 // chromosome 2 open reading frame 27 // 2q21.1-q21.2 // 29	0.0373148	0	0.0155013	9.07708e-26	3.90172	3.90172	1.04426	6.89102	4.45724	4.45724	0.808505	7.89402	0.0373148	-0.555518	NM_013310 // RefSeq // Homo sapiens chromosome 2 open reading frame 27 (C2orf27)	NM_013310
16	3978295	NM_144968 // RefSeq // Homo sapiens RIB43A domain with coiled-coils 1 (RIBC1), t	NM_144968 // Hs.351743 // testis; uterus; pharynx; ovary; mouth; uncharacterized	chrX	+	53466384	53512443	87	NM_144968 // RIBC1 // RIB43A domain with coiled-coils 1 // Xp11.22 // 158787 ///	0.343735	0	0.015513	3.96975e-29	4.6241	4.6241	1.63161	8.29044	4.89801	4.89801	1.29271	8.71468	0.343735	-0.273912	NM_144968 // RefSeq // Homo sapiens RIB43A domain with coiled-coils 1 (RIBC1), t	NM_144968
28	2954771	NM_019096 // RefSeq // Homo sapiens GTP binding protein 2 (GTPBP2), mRNA. // chr	NM_019096 // Hs.485449 // colon; uterus; embryonic tissue; blood; cervix; unchar	chr6	-	43681031	43704877	154	NM_019096 // GTPBP2 // GTP binding protein 2 // 6p21-p12 // 54676 /// BC032315 /	0.237719	0	0.0155178	0	5.81436	5.81436	1.46103	9.96434	6.2613	6.2613	1.23181	10.1453	0.237719	-0.446933	NM_019096 // RefSeq // Homo sapiens GTP binding protein 2 (GTPBP2), mRNA. // chr	NM_019096
11	2959197	NM_016571 // RefSeq // Homo sapiens glutamate-ammonia ligase (glutamine syntheta	NM_016571 // Hs.149585 // eye; ovary; pancreas; mouth; cranial nerve; uterus ///	chr6	-	64046500	64087841	53	NM_016571 // GLULD1 // glutamate-ammonia ligase (glutamine synthetase) domain co	0.503323	6.30837e-41	0.0155182	2.5817e-14	3.206	3.206	1.61921	5.68434	3.35646	3.35646	1.57067	5.80069	0.503323	-0.150463	NM_016571 // RefSeq // Homo sapiens glutamate-ammonia ligase (glutamine syntheta	NM_016571
6	2494064	NM_013434 // RefSeq // Homo sapiens Kv channel interacting protein 3, calsenilin	NM_013434 // Hs.437376 // brain; whole brain; uncharacterized tissue; kidney; mi	chr2	+	95415979	95442597	125	NM_013434 // KCNIP3 // Kv channel interacting protein 3, calsenilin // 2q21.1 //	0.490468	2.6369e-24	0.0156818	6.07351e-10	5.77478	5.77478	1.95063	7.87293	6.06419	6.06419	1.29219	8.05314	0.490468	-0.289414	NM_013434 // RefSeq // Homo sapiens Kv channel interacting protein 3, calsenilin	NM_013434
48	3465593	NM_003566 // RefSeq // Homo sapiens early endosome antigen 1, 162kD (EEA1), mRNA	NM_003566 // Hs.567367 // brain; larynx; placenta; ovary; vascular; cochlea; unc	chr12	-	91690119	91913755	297	NM_003566 // EEA1 // early endosome antigen 1, 162kD // 12q22 // 8411	0.560319	0	0.0156846	0	5.55619	5.55619	0.841935	10.0787	5.73806	5.73806	0.917538	10.6209	0.560319	-0.181876	NM_003566 // RefSeq // Homo sapiens early endosome antigen 1, 162kD (EEA1), mRNA	NM_003566
19	2659887	NM_001011537 // RefSeq // Homo sapiens forty-two-three domain containing 1 (FYTT	NM_001011537 // Hs.277533 // testis; brain; uterus; placenta; whole brain; lymph	chr3	+	198960821	198996244	91	NM_001011537 // FYTTD1 // forty-two-three domain containing 1 // 3q29 // 84248 /	0.447655	0	0.0157029	0	6.5908	6.5908	1.04426	9.77068	6.8761	6.8761	1.29219	10.3028	0.447655	-0.285304	NM_001011537 // RefSeq // Homo sapiens forty-two-three domain containing 1 (FYTT	NM_001011537
15	3750939	NM_006923 // RefSeq // Homo sapiens stromal cell-derived factor 2 (SDF2), mRNA.	NM_006923 // Hs.514036 // lung; kidney; stomach; testis; mammary gland; larynx;	chr17	-	23999521	24013403	71	NM_006923 // SDF2 // stromal cell-derived factor 2 // 17q11.2 // 6388 /// BC0005	0.228153	0	0.0158013	8.99237e-40	5.75542	5.75542	1.04426	9.37186	6.20327	6.20327	0.625467	9.91597	0.228153	-0.447846	NM_006923 // RefSeq // Homo sapiens stromal cell-derived factor 2 (SDF2), mRNA.	NM_006923
106	3035464	NM_003550 // RefSeq // Homo sapiens MAD1 mitotic arrest deficient-like 1 (yeast)	NM_003550 // Hs.209128 // brain; connective tissue; testis; skin; uncharacterize	chr7	-	1757001	2239131	608	NM_003550 // MAD1L1 // MAD1 mitotic arrest deficient-like 1 (yeast) // 7p22 // 8	0.19957	0	0.0158275	0	5.73297	5.73297	1.31267	9.97842	6.11755	6.11755	1.56506	10.0193	0.19957	-0.384582	NM_003550 // RefSeq // Homo sapiens MAD1 mitotic arrest deficient-like 1 (yeast)	NM_003550
22	2938412	BC037855 // GenBank // Homo sapiens cDNA clone IMAGE:5272115. // chr6 // 100 //	BC037855 // Hs.209463 // testis; kidney; mixed; colon; whole brain; stomach; ute	chr6	-	903563	1046608	218	BC037855 // LOC285768 // hypothetical protein LOC285768 // 6p25.3 // 285768 ///	0.284739	0	0.0159334	2.05771e-25	4.47134	4.47134	1.3107	7.7942	4.76354	4.76354	1.53603	7.94712	0.284739	-0.292196	BC037855 // GenBank // Homo sapiens cDNA clone IMAGE:5272115. // chr6 // 100 //	BC037855
7	3045798	ENST00000329808 // ENSEMBL Transcript // similar to glycine cleavage system prot	XM_001132752 // Hs.648103 // brain; mixed; lung; other; embryonic tissue; unchar	chr7	-	35756551	35807077	67	XM_001132752 // LOC442293 // similar to glycine cleavage system protein H (amino	0.268469	6.22577e-30	0.0159633	1.17052e-14	4.75894	4.75894	2.19014	6.93817	5.18463	5.18463	2.1227	8.09241	0.268469	-0.425694	ENST00000329808 // ENSEMBL Transcript // similar to glycine cleavage system prot	ENST00000329808
14	3833214	ENST00000354596 // ENSEMBL Transcript // Eosinophil lysophospholipase-like gene:	AK123499 // Hs.456377 // uterus; brain; heart; mammary gland	chr19	+	44861864	44880553	86	AK123499 // LOC400696 // eosinophil lysophospholipase-like // 19q13.2 // 400696	0.460987	0	0.0159683	7.5259e-15	3.28853	3.28853	0.860844	6.74883	3.48094	3.48094	1.02821	6.99067	0.460987	-0.192411	ENST00000354596 // ENSEMBL Transcript // Eosinophil lysophospholipase-like gene:	ENST00000354596
12	2375038	NM_004767 // RefSeq // Homo sapiens G protein-coupled receptor 37 like 1 (GPR37L	NM_004767 // Hs.132049 // brain; whole brain; uncharacterized tissue; kidney; pl	chr1	+	200273649	200367166	84	NM_004767 // GPR37L1 // G protein-coupled receptor 37 like 1 // 1q32.1 // 9283 /	0.201448	0	0.0160069	1.21612e-36	6.87946	6.87946	0.91903	10.5264	7.49862	7.49862	1.59845	11.1648	0.201448	-0.619156	NM_004767 // RefSeq // Homo sapiens G protein-coupled receptor 37 like 1 (GPR37L	NM_004767
36	3195238	NM_000832 // RefSeq // Homo sapiens glutamate receptor, ionotropic, N-methyl D-a	NM_000832 // Hs.558334 // brain; uncharacterized tissue; eye; whole brain; crani	chr9	+	139152663	139183028	198	NM_000832 // GRIN1 // glutamate receptor, ionotropic, N-methyl D-aspartate 1 //	0.227719	0	0.0160534	0	7.84937	7.84937	2.51866	11.4397	8.27591	8.27591	3.27216	11.6031	0.227719	-0.426538	NM_000832 // RefSeq // Homo sapiens glutamate receptor, ionotropic, N-methyl D-a	NM_000832
19	3621117	NM_052955 // RefSeq // Homo sapiens transglutaminase 7 (TGM7), mRNA. // chr15 //	NM_052955 // Hs.164661 // mixed; testis; heart	chr15	-	41355770	41404283	87	NM_052955 // TGM7 // transglutaminase 7 // 15q15.2 // 116179	0.266511	0	0.0160883	4.50989e-31	4.33417	4.33417	1.44333	7.08323	4.63153	4.63153	1.46304	7.68627	0.266511	-0.297364	NM_052955 // RefSeq // Homo sapiens transglutaminase 7 (TGM7), mRNA. // chr15 //	NM_052955
7	3461146	NM_020525 // RefSeq // Homo sapiens interleukin 22 (IL22), mRNA. // chr12 // 100	NM_020525 // Hs.287369 // mixed; blood	chr12	-	66928292	66933526	36	NM_020525 // IL22 // interleukin 22 // 12q15 // 50616	0.0894585	1.43073e-25	0.0160966	2.02595e-05	3.2562	3.2562	1.09907	6.71336	3.76183	3.76183	1.34698	6.26207	0.0894585	-0.50563	NM_020525 // RefSeq // Homo sapiens interleukin 22 (IL22), mRNA. // chr12 // 100	NM_020525
20	2635184	NM_007072 // RefSeq // Homo sapiens HERV-H LTR-associating 2 (HHLA2), mRNA. // c	NM_007072 // Hs.252351 // colon; lung; kidney; small intestine; trachea; stomach	chr3	+	109498086	109584779	109	NM_007072 // HHLA2 // HERV-H LTR-associating 2 // 3q13.13 // 11148 /// AK027132	0.287701	0	0.0161088	1.77856e-27	3.23389	3.23389	1.34408	6.28847	3.5148	3.5148	1.47342	6.59795	0.287701	-0.280911	NM_007072 // RefSeq // Homo sapiens HERV-H LTR-associating 2 (HHLA2), mRNA. // c	NM_007072
13	2903470	NM_014234 // RefSeq // Homo sapiens hydroxysteroid (17-beta) dehydrogenase 8 (HS	NM_014234 // Hs.415058 // mixed; prostate; kidney; uncharacterized tissue; embry	chr6	+	33276220	33280187	57	NM_014234 // HSD17B8 // hydroxysteroid (17-beta) dehydrogenase 8 // 6p21.3 // 79	0.166762	0	0.0161518	1.25176e-35	6.30181	6.30181	3.26109	9.17833	6.85107	6.85107	2.10905	9.3868	0.166762	-0.549254	NM_014234 // RefSeq // Homo sapiens hydroxysteroid (17-beta) dehydrogenase 8 (HS	NM_014234
35	3577160	NM_014216 // RefSeq // Homo sapiens inositol 1,3,4-triphosphate 5/6 kinase (ITPK	NM_014216 // Hs.308122 // brain; lung; skin; uncharacterized tissue; placenta; u	chr14	-	92473012	92652450	295	NM_014216 // ITPK1 // inositol 1,3,4-triphosphate 5/6 kinase // 14q31 // 3705 //	0.109177	0	0.016187	0	6.95271	6.95271	3.03006	10.3744	7.45161	7.45161	3.31809	10.966	0.109177	-0.498892	NM_014216 // RefSeq // Homo sapiens inositol 1,3,4-triphosphate 5/6 kinase (ITPK	NM_014216
32	3896034	NM_014737 // RefSeq // Homo sapiens Ras association (RalGDS/AF-6) domain family	NM_014737 // Hs.631504 // brain; lymph node; placenta; spleen; spinal cord; cran	chr20	-	4655529	4752291	180	NM_014737 // RASSF2 // Ras association (RalGDS/AF-6) domain family 2 // 20pter-p	0.288588	0	0.0161925	0	6.56231	6.56231	1.39892	10.3442	6.92212	6.92212	1.48376	11.5774	0.288588	-0.359811	NM_014737 // RefSeq // Homo sapiens Ras association (RalGDS/AF-6) domain family	NM_014737
37	2826426	XM_927647 // RefSeq // PREDICTED: Homo sapiens PR domain containing 6 (PRDM6), m	XM_927647 // Hs.135118 // mixed; lung; uncharacterized tissue; kidney; brain; th	chr5	+	122418162	122551624	279	XM_927647 // PRDM6 // PR domain containing 6 // 5q23.2 // 93166 /// XM_937753 //	0.222947	0	0.0162019	0	5.21086	5.21086	1.0903	8.72378	5.54825	5.54825	1.57735	9.13492	0.222947	-0.337397	XM_927647 // RefSeq // PREDICTED: Homo sapiens PR domain containing 6 (PRDM6), m	XM_927647
22	2375596	NM_000674 // RefSeq // Homo sapiens adenosine A1 receptor (ADORA1), transcript v	NM_000674 // Hs.77867 // brain; testis; whole brain; uncharacterized tissue; kid	chr1	+	201326405	201403383	121	NM_000674 // ADORA1 // adenosine A1 receptor // 1q32.1 // 134 /// NM_001048230 /	0.228903	0	0.0162128	0	5.90561	5.90561	2.39249	10.2497	6.30881	6.30881	1.6314	10.7065	0.228903	-0.403208	NM_000674 // RefSeq // Homo sapiens adenosine A1 receptor (ADORA1), transcript v	NM_000674
7	3668738	XR_017080 // RefSeq // PREDICTED: Homo sapiens similar to Lamina-associated poly	XR_017080 // Hs.557351 // mixed; eye; placenta; testis; brain; larynx	chr16	+	73254068	73260220	32	XR_017080 // LOC645726 // similar to Lamina-associated polypeptide 2, isoforms b	0.229849	0	0.0162276	3.83554e-12	4.21465	4.21465	1.58922	7.4852	4.54123	4.54123	1.66192	8.03136	0.229849	-0.326579	XR_017080 // RefSeq // PREDICTED: Homo sapiens similar to Lamina-associated poly	XR_017080
13	3051907	NM_006213 // RefSeq // Homo sapiens phosphorylase kinase, gamma 1 (muscle) (PHKG	NM_006213 // Hs.646474 // uncharacterized tissue; brain; heart; mouth; muscle; m	chr7	-	56114798	56128147	60	NM_006213 // PHKG1 // phosphorylase kinase, gamma 1 (muscle) // 7p11.2 // 5260 /	0.166015	0	0.0162486	5.20013e-27	4.77843	4.77843	1.61739	7.54525	5.27314	5.27314	2.00065	7.87744	0.166015	-0.494706	NM_006213 // RefSeq // Homo sapiens phosphorylase kinase, gamma 1 (muscle) (PHKG	NM_006213
31	2693937	NM_016372 // RefSeq // Homo sapiens G protein-coupled receptor 175 (GPR175), mRN	NM_016372 // Hs.6418 // brain; uncharacterized tissue; placenta; mixed; ovary; c	chr3	-	128774609	128799762	146	NM_016372 // GPR175 // G protein-coupled receptor 175 // 3q21.2 // 131601 /// AK	0.188106	0	0.0162597	0	5.85842	5.85842	0.747535	10.3128	6.30165	6.30165	1.80903	10.7233	0.188106	-0.44323	NM_016372 // RefSeq // Homo sapiens G protein-coupled receptor 175 (GPR175), mRN	NM_016372
5	2675539	XR_017212 // RefSeq // PREDICTED: Homo sapiens similar to peptidylprolyl isomera	XR_017212 // Hs.646844 // ---	chr3	-	50683918	50762040	57	XR_017212 // LOC646587 // similar to peptidylprolyl isomerase A isoform 1 // 3p2	0.62924	1.00823e-28	0.0163049	3.4328e-09	3.68083	3.68083	1.69932	6.427	3.80872	3.80872	1.53447	6.8434	0.62924	-0.127891	XR_017212 // RefSeq // PREDICTED: Homo sapiens similar to peptidylprolyl isomera	XR_017212
9	3870449	NM_198481 // RefSeq // Homo sapiens V-set and transmembrane domain containing 1	NM_198481 // Hs.444431 // blood; brain; connective tissue; mixed /// BC100942 //	chr19	-	59235900	59259019	50	NM_198481 // VSTM1 // V-set and transmembrane domain containing 1 // 19q13.42 //	0.133944	3.15493e-38	0.0163083	4.13701e-14	4.19802	4.19802	1.6476	7.04761	4.66878	4.66878	1.75081	7.82708	0.133944	-0.470757	NM_198481 // RefSeq // Homo sapiens V-set and transmembrane domain containing 1	NM_198481
25	3960005	NM_182486 // RefSeq // Homo sapiens C1q and tumor necrosis factor related protei	NM_182486 // Hs.22011 // placenta; mixed; uncharacterized tissue; embryonic tiss	chr22	-	35906157	35925342	114	NM_182486 // C1QTNF6 // C1q and tumor necrosis factor related protein 6 // 22q13	0.159774	0	0.0163476	7.02071e-38	4.77829	4.77829	0.841935	8.08676	5.22439	5.22439	1.20104	8.73992	0.159774	-0.446096	NM_182486 // RefSeq // Homo sapiens C1q and tumor necrosis factor related protei	NM_182486
13	3577577	NM_016186 // RefSeq // Homo sapiens serpin peptidase inhibitor, clade A (alpha-1	NM_016186 // Hs.118620 // liver; mixed; heart; testis /// BC022261 // Hs.118620	chr14	-	93819407	93829351	53	NM_016186 // SERPINA10 // serpin peptidase inhibitor, clade A (alpha-1 antiprote	0.160986	0	0.0164329	1.3726e-14	4.26619	4.26619	1.05035	7.89691	4.65536	4.65536	1.62779	8.32225	0.160986	-0.389167	NM_016186 // RefSeq // Homo sapiens serpin peptidase inhibitor, clade A (alpha-1	NM_016186
15	3863576	NM_002573 // RefSeq // Homo sapiens platelet-activating factor acetylhydrolase,	NM_002573 // Hs.466831 // brain; lung; mixed; prostate; uterus; eye; embryonic t	chr19	-	47493044	47499518	60	NM_002573 // PAFAH1B3 // platelet-activating factor acetylhydrolase, isoform Ib,	0.225914	0	0.0164412	5.70623e-31	6.66189	6.66189	3.00295	9.99229	7.07576	7.07576	1.36975	10.3496	0.225914	-0.413871	NM_002573 // RefSeq // Homo sapiens platelet-activating factor acetylhydrolase,	NM_002573
41	3690470	NM_145186 // RefSeq // Homo sapiens ATP-binding cassette, sub-family C (CFTR/MRP	NM_145186 // Hs.643528 // mammary gland; mixed; testis; uncharacterized tissue;	chr16	-	46756384	46838796	204	NM_145186 // ABCC11 // ATP-binding cassette, sub-family C (CFTR/MRP), member 11	0.197748	0	0.0164425	0	4.37812	4.37812	1.52925	7.1992	4.79729	4.79729	1.67132	7.8285	0.197748	-0.419173	NM_145186 // RefSeq // Homo sapiens ATP-binding cassette, sub-family C (CFTR/MRP	NM_145186
23	3401325	NM_006675 // RefSeq // Homo sapiens tetraspanin 9 (TSPAN9), mRNA. // chr12 // 10	NM_006675 // Hs.504517 // embryonic tissue; prostate; mixed; liver; uncharacteri	chr12	+	3056806	3263204	196	NM_006675 // TSPAN9 // tetraspanin 9 // 12p13.33-p13.32 // 10867 /// AK022248 //	0.204841	0	0.0165093	0	4.95892	4.95892	1.88339	10.0854	5.38742	5.38742	2.18391	10.4633	0.204841	-0.4285	NM_006675 // RefSeq // Homo sapiens tetraspanin 9 (TSPAN9), mRNA. // chr12 // 10	NM_006675
9	3947213	ENST00000381348 // ENSEMBL Transcript // hypothetical protein LOC339674, transcr	XM_934917 // Hs.517656 // brain; uncharacterized tissue; whole brain; pancreas /	chr22	+	40673734	40684881	34	XM_934917 // LOC339674 // hypothetical protein LOC339674 // 22q13.2 // 339674 //	0.0516128	0	0.0165889	2.836e-16	5.50646	5.50646	1.60225	8.21568	6.09742	6.09742	2.29967	8.75544	0.0516128	-0.590955	ENST00000381348 // ENSEMBL Transcript // hypothetical protein LOC339674, transcr	ENST00000381348
32	3878467	NM_006363 // RefSeq // Homo sapiens Sec23 homolog B (S. cerevisiae) (SEC23B), tr	NM_006363 // Hs.369373 // brain; testis; nerve; esophagus; thymus; trachea; bloo	chr20	+	18436157	18490045	162	NM_006363 // SEC23B // Sec23 homolog B (S. cerevisiae) // 20p11.23 // 10483 ///	0.335182	0	0.0166703	0	6.61122	6.61122	1.71607	10.2775	6.97919	6.97919	1.92854	10.7508	0.335182	-0.367967	NM_006363 // RefSeq // Homo sapiens Sec23 homolog B (S. cerevisiae) (SEC23B), tr	NM_006363
16	3252577	NM_003375 // RefSeq // Homo sapiens voltage-dependent anion channel 2 (VDAC2), m	NM_003375 // Hs.355927 // brain; lung; embryonic tissue; whole brain; testis; pr	chr10	+	76639941	76661389	127	NM_003375 // VDAC2 // voltage-dependent anion channel 2 // 10q22 // 7417 /// L08	0.157685	0	0.0167082	1.84155e-33	5.22062	5.22062	1.17526	9.03962	5.74291	5.74291	2.02309	9.38899	0.157685	-0.522289	NM_003375 // RefSeq // Homo sapiens voltage-dependent anion channel 2 (VDAC2), m	NM_003375
25	2322786	NM_013358 // RefSeq // Homo sapiens peptidyl arginine deiminase, type I (PADI1),	NM_013358 // Hs.412941 // mouth; brain; uncharacterized tissue; skin; colon; sto	chr1	+	17404217	17445087	110	NM_013358 // PADI1 // peptidyl arginine deiminase, type I // 1p36.13 // 29943	0.189501	0	0.016741	1.72224e-39	4.90742	4.90742	1.38469	8.72912	5.30576	5.30576	1.75718	8.6648	0.189501	-0.398342	NM_013358 // RefSeq // Homo sapiens peptidyl arginine deiminase, type I (PADI1),	NM_013358
4	3175469	NM_002295 // RefSeq // Homo sapiens ribosomal protein SA (RPSA), transcript vari	NM_002295 // Hs.449909 // lung; embryonic tissue; eye; brain; uterus; colon; pan	chr9	+	78198640	78204378	28	NM_002295 // RPSA // ribosomal protein SA // 3p22.2 // 3921 /// NM_001012321 //	0.471251	1.48499e-16	0.0168217	0.34166	3.9894	3.9894	1.29259	7.5164	3.80769	3.80769	0.714908	7.86808	0.471251	0.181714	NM_002295 // RefSeq // Homo sapiens ribosomal protein SA (RPSA), transcript vari	NM_002295
41	3365360	NM_181508 // RefSeq // Homo sapiens Hermansky-Pudlak syndrome 5 (HPS5), transcri	NM_181508 // Hs.437599 // testis; brain; mixed; muscle; bone; uncharacterized ti	chr11	-	18250235	18300626	237	NM_181508 // HPS5 // Hermansky-Pudlak syndrome 5 // 11p14 // 11234 /// NM_007216	0.286107	0	0.0168395	0	4.94224	4.94224	1.09844	8.20896	5.34882	5.34882	1.41276	8.91393	0.286107	-0.406585	NM_181508 // RefSeq // Homo sapiens Hermansky-Pudlak syndrome 5 (HPS5), transcri	NM_181508
4	2542780	XR_019634 // RefSeq // PREDICTED: Homo sapiens similar to 40S ribosomal protein	XR_019634 // Hs.651054 // ---	chr2	-	20218561	20235966	34	XR_019634 // LOC402069 // similar to 40S ribosomal protein S16 // 2p24.1 // 4020	0.604712	7.62521e-22	0.0169212	1.62044e-06	5.44485	5.44485	3.43053	7.72921	5.59407	5.59407	2.94185	8.11829	0.604712	-0.149217	XR_019634 // RefSeq // PREDICTED: Homo sapiens similar to 40S ribosomal protein	XR_019634
15	3590204	NM_020857 // RefSeq // Homo sapiens vacuolar protein sorting protein 18 (VPS18),	NM_020857 // Hs.23876 // lung; skin; brain; pancreas; embryonic tissue; mouth; l	chr15	+	38973920	38983614	68	NM_020857 // VPS18 // vacuolar protein sorting 18 homolog (S. cerevisiae) // 15q	0.122995	0	0.0169249	8.07148e-43	6.41767	6.41767	1.17476	9.38306	6.99968	6.99968	1.20749	10.03	0.122995	-0.582013	NM_020857 // RefSeq // Homo sapiens vacuolar protein sorting protein 18 (VPS18),	NM_020857
4	3864698	NM_001033719 // RefSeq // Homo sapiens zinc finger protein 404 (ZNF404), mRNA. /	NM_001033719 // Hs.76561 // eye; brain; pancreas; lymph node; muscle; mixed; sma	chr19	-	49068359	49079345	31	NM_001033719 // ZNF404 // zinc finger protein 404 // 19q13.31 // 342908	0.843483	6.35936e-14	0.0169287	2.58338e-13	6.26688	6.26688	4.5059	7.98764	6.35763	6.35763	3.40425	8.59525	0.843483	-0.090754	NM_001033719 // RefSeq // Homo sapiens zinc finger protein 404 (ZNF404), mRNA. /	NM_001033719
104	3175597	NM_033305 // RefSeq // Homo sapiens vacuolar protein sorting 13 homolog A (S. ce	NM_033305 // Hs.459790 // lung; testis; mixed; mammary gland; brain; kidney; unc	chr9	+	78982181	79222345	416	NM_033305 // VPS13A // vacuolar protein sorting 13 homolog A (S. cerevisiae) //	0.699455	0	0.0169435	0	6.4154	6.4154	0.841935	10.4368	6.56911	6.56911	0.969542	10.8699	0.699455	-0.153702	NM_033305 // RefSeq // Homo sapiens vacuolar protein sorting 13 homolog A (S. ce	NM_033305
2	2390882	XM_496331 // RefSeq // PREDICTED: Homo sapiens similar to myosin XV (LOC440551),	XM_496331 // Hs.585409 // testis	chr1	-	535762	536254	16	XM_496331 // LOC440551 // similar to myosin XV // 1p36.33 // 440551	0.863258	2.83527e-09	0.0169635	0.0012693	4.14668	4.14668	1.65626	5.5708	4.20784	4.20784	2.21251	6.55989	0.863258	-0.0611595	XM_496331 // RefSeq // PREDICTED: Homo sapiens similar to myosin XV (LOC440551),	XM_496331
14	3475324	NM_019034 // RefSeq // Homo sapiens ras homolog gene family, member F (in filopo	NM_019034 // Hs.524804 // brain; lung; whole brain; eye; uterus; uncharacterized	chr12	-	120698553	120716624	88	NM_019034 // RHOF // ras homolog gene family, member F (in filopodia) // 12q24.3	0.277659	0	0.0170226	4.26285e-31	5.57733	5.57733	3.67032	7.62679	5.92833	5.92833	3.00337	8.01634	0.277659	-0.351	NM_019034 // RefSeq // Homo sapiens ras homolog gene family, member F (in filopo	NM_019034
15	2830598	NM_058244 // RefSeq // Homo sapiens wingless-type MMTV integration site family,	NM_058244 // Hs.591274 // --- /// AY009402 // Hs.591274 // ---	chr5	+	137447578	137459205	69	NM_058244 // WNT8A // wingless-type MMTV integration site family, member 8A // 5	0.279052	0	0.017086	1.13815e-18	4.20497	4.20497	1.68841	6.61335	4.48991	4.48991	1.5305	7.74295	0.279052	-0.284938	NM_058244 // RefSeq // Homo sapiens wingless-type MMTV integration site family,	NM_058244
39	3389353	NM_001223 // RefSeq // Homo sapiens caspase 1, apoptosis-related cysteine peptid	NM_001223 // Hs.2490 // uncharacterized tissue; larynx; bladder; brain; adrenal	chr11	-	104401455	104917204	352	NM_001223 // CASP1 // caspase 1, apoptosis-related cysteine peptidase (interleuk	0.141116	0	0.0170865	1.4013e-45	3.4128	3.4128	1.16764	7.19603	3.80453	3.80453	1.17056	7.59742	0.141116	-0.391733	NM_001223 // RefSeq // Homo sapiens caspase 1, apoptosis-related cysteine peptid	NM_001223
10	2756404	NM_133474 // RefSeq // Homo sapiens zinc finger protein 721 (ZNF721), mRNA. // c	NR_002451 // Hs.428360 // brain; whole brain; testis; placenta; embryonic tissue	chr4	-	423294	482935	119	NM_133474 // ZNF721 // zinc finger protein 721 // 4p16.3 // 170960 /// NR_002451	0.659147	0	0.0170938	2.54572e-23	7.06229	7.06229	1.434	9.73382	7.21522	7.21522	2.39464	9.85103	0.659147	-0.152921	NM_133474 // RefSeq // Homo sapiens zinc finger protein 721 (ZNF721), mRNA. // c	NM_133474
2	2500316	XM_001129914 // RefSeq // PREDICTED: Homo sapiens hypothetical protein LOC729312	XM_001129914 // Hs.572681 // uncharacterized tissue; testis; connective tissue;	chr2	+	111670020	111680522	8	XM_001129914 // LOC729312 // hypothetical protein LOC729312 // 2q13 // 729312 //	0.569689	0.254663	0.0171558	0.00668248	4.09892	4.09892	2.55431	5.21126	4.30379	4.30379	3.18224	5.76603	0.569689	-0.204869	XM_001129914 // RefSeq // PREDICTED: Homo sapiens hypothetical protein LOC729312	XM_001129914
17	2478064	XM_001131915 // RefSeq // PREDICTED: Homo sapiens hypothetical protein LOC729967	XM_001131915 // Hs.145555 // mixed; brain; lung; uncharacterized tissue; whole b	chr2	+	39038679	39062260	101	XM_001131915 // LOC729967 // hypothetical protein LOC729967 // 2p22.1 // 729967	0.346973	0	0.0171977	1.00731e-28	4.68417	4.68417	1.54127	7.87337	4.97262	4.97262	1.01157	8.18624	0.346973	-0.288458	XM_001131915 // RefSeq // PREDICTED: Homo sapiens hypothetical protein LOC729967	XM_001131915
5	3202472	XR_017292 // RefSeq // PREDICTED: Homo sapiens similar to Cutaneous T-cell lymph	XR_017292 // Hs.571615 // uncharacterized tissue; muscle; pineal gland; mixed; c	chr9	-	27600661	27679389	40	XR_017292 // LOC392298 // similar to Cutaneous T-cell lymphoma-associated antige	0.0906162	2.70663e-32	0.0171991	0.0016681	3.12241	3.12241	1.12217	7.23637	3.49849	3.49849	1.37093	7.80718	0.0906162	-0.376089	XR_017292 // RefSeq // PREDICTED: Homo sapiens similar to Cutaneous T-cell lymph	XR_017292
25	3704270	NM_000101 // RefSeq // Homo sapiens cytochrome b-245, alpha polypeptide (CYBA),	NM_000101 // Hs.513803 // mixed; uncharacterized tissue; colon; pancreas; skin;	chr16	-	87237211	87245041	112	NM_000101 // CYBA // cytochrome b-245, alpha polypeptide // 16q24 // 1535 /// BC	0.10174	0	0.0172337	0	5.7088	5.7088	2.11851	8.62491	6.21877	6.21877	2.26262	9.3791	0.10174	-0.509967	NM_000101 // RefSeq // Homo sapiens cytochrome b-245, alpha polypeptide (CYBA),	NM_000101
15	3955915	NM_001008566 // RefSeq // Homo sapiens tyrosylprotein sulfotransferase 2 (TPST2)	NM_001008566 // Hs.632768 // placenta; brain; uncharacterized tissue; lung; live	chr22	-	25247963	25316089	65	NM_001008566 // TPST2 // tyrosylprotein sulfotransferase 2 // 22q12.1 // 8459 //	0.0875188	0	0.0172357	1.36357e-25	5.70098	5.70098	1.45973	9.99615	6.34052	6.34052	1.92247	10.4466	0.0875188	-0.639538	NM_001008566 // RefSeq // Homo sapiens tyrosylprotein sulfotransferase 2 (TPST2)	NM_001008566
15	2320657	NM_152942 // RefSeq // Homo sapiens tumor necrosis factor receptor superfamily,	NM_152942 // Hs.1314 // uncharacterized tissue; embryonic tissue; uterus; lung;	chr1	+	12001906	12039524	87	NM_152942 // TNFRSF8 // tumor necrosis factor receptor superfamily, member 8 //	0.318156	0	0.017241	8.21305e-37	6.16683	6.16683	2.37505	12.3867	6.52579	6.52579	2.97361	12.6829	0.318156	-0.35896	NM_152942 // RefSeq // Homo sapiens tumor necrosis factor receptor superfamily,	NM_152942
24	3816112	NM_079834 // RefSeq // Homo sapiens secretory carrier membrane protein 4 (SCAMP4	NM_079834 // Hs.144980 // brain; blood; prostate; testis; kidney; ovary; pancrea	chr19	+	1856381	1893612	118	NM_079834 // SCAMP4 // secretory carrier membrane protein 4 // 19p13.3 // 113178	0.0674843	0	0.0172711	0	6.03685	6.03685	3.26632	9.11292	6.77648	6.77648	4.1299	10.1116	0.0674843	-0.73963	NM_079834 // RefSeq // Homo sapiens secretory carrier membrane protein 4 (SCAMP4	NM_079834
23	3597702	NM_203373 // RefSeq // Homo sapiens F-box and leucine-rich repeat protein 22 (FB	NM_203373 // Hs.591116 // testis; mixed; kidney; prostate; uncharacterized tissu	chr15	+	61676609	61688346	117	NM_203373 // FBXL22 // F-box and leucine-rich repeat protein 22 // 15q22.31 // 2	0.262516	0	0.0173028	6.04376e-31	5.01163	5.01163	1.50816	9.53419	5.30293	5.30293	1.14092	9.65555	0.262516	-0.291298	NM_203373 // RefSeq // Homo sapiens F-box and leucine-rich repeat protein 22 (FB	NM_203373
11	3468782	ENST00000388789 // ENSEMBL Transcript // cdna:known chromosome:NCBI36:12:102761	XR_015316 // Hs.506549 // mixed; eye; mammary gland; testis; uncharacterized tis	chr12	-	102761657	102801678	93	XR_015316 // LOC253724 // hypothetical LOC253724 // 12q23.3 // 253724 /// XR_015	0.243529	0	0.0173127	1.89635e-13	3.55825	3.55825	1.58593	9.46943	3.87011	3.87011	1.18721	10.0819	0.243529	-0.311853	ENST00000388789 // ENSEMBL Transcript // cdna:known chromosome:NCBI36:12:102761	ENST00000388789
4	3474495	NM_016399 // RefSeq // Homo sapiens TP53 regulated inhibitor of apoptosis 1 (TRI	NM_016399 // Hs.69499 // placenta; mixed; lung; uterus; brain; embryonic tissue;	chr12	-	119366160	119368593	21	NM_016399 // TRIAP1 // TP53 regulated inhibitor of apoptosis 1 // 12q24.31 // 51	0.640654	1.54663e-25	0.017451	0.000958807	4.54982	4.54982	1.04426	8.67099	4.70352	4.70352	1.17974	9.44182	0.640654	-0.153694	NM_016399 // RefSeq // Homo sapiens TP53 regulated inhibitor of apoptosis 1 (TRI	NM_016399
73	3241601	NM_001026383 // RefSeq // Homo sapiens coiled-coil domain containing 7 (CCDC7),	NM_001026383 // Hs.585464 // testis; brain; prostate; dorsal root ganglion; bone	chr10	+	32675541	33222598	439	NM_001026383 // CCDC7 // coiled-coil domain containing 7 // 10p11.22 // 221016 /	0.77358	0	0.0174935	0	4.7453	4.7453	0.940765	11.6859	4.8145	4.8145	0.625467	11.8874	0.77358	-0.0692023	NM_001026383 // RefSeq // Homo sapiens coiled-coil domain containing 7 (CCDC7),	NM_001026383
6	2462826	XM_001132951 // RefSeq // PREDICTED: Homo sapiens hypothetical protein LOC339535	XM_001132951 // Hs.532047 // kidney; mixed; uterus; muscle; pharynx; embryonic t	chr1	-	236706494	236715938	35	XM_001132951 // LOC339535 // hypothetical protein LOC339535 // 1q43 // 339535	0.124499	2.93858e-24	0.0175237	3.63455e-08	4.14778	4.14778	1.86111	6.14139	4.66651	4.66651	1.61797	6.69732	0.124499	-0.518728	XM_001132951 // RefSeq // PREDICTED: Homo sapiens hypothetical protein LOC339535	XM_001132951
17	3742415	NM_004890 // RefSeq // Homo sapiens sperm associated antigen 7 (SPAG7), mRNA. //	NM_004890 // Hs.90436 // brain; lung; uncharacterized tissue; blood; eye; whole	chr17	-	4803246	4811875	116	NM_004890 // SPAG7 // sperm associated antigen 7 // 17p13.2 // 9552 /// BC007819	0.135533	0	0.01755	3.80677e-26	6.10913	6.10913	2.07713	9.0404	6.56124	6.56124	1.76777	9.51055	0.135533	-0.452111	NM_004890 // RefSeq // Homo sapiens sperm associated antigen 7 (SPAG7), mRNA. //	NM_004890
8	2886679	NM_004137 // RefSeq // Homo sapiens potassium large conductance calcium-activate	NM_004137 // Hs.484099 // uterus; mixed; uncharacterized tissue; cranial nerve;	chr5	-	169737753	169749216	32	NM_004137 // KCNMB1 // potassium large conductance calcium-activated channel, su	0.170987	1.3733e-25	0.0175865	1.55648e-15	5.32963	5.32963	2.97372	7.50284	5.87963	5.87963	1.6973	8.71397	0.170987	-0.550004	NM_004137 // RefSeq // Homo sapiens potassium large conductance calcium-activate	NM_004137
25	3229797	NM_181701 // RefSeq // Homo sapiens quiescin Q6-like 1 (QSCN6L1), mRNA. // chr9	NM_181701 // Hs.144073 // uncharacterized tissue; brain; eye; mixed; colon; lymp	chr9	-	138238016	138260061	148	NM_181701 // QSCN6L1 // quiescin Q6-like 1 // 9q34.3 // 169714	0.214166	0	0.0175876	0	5.96011	5.96011	3.10085	7.89601	6.35788	6.35788	3.03128	8.6373	0.214166	-0.397768	NM_181701 // RefSeq // Homo sapiens quiescin Q6-like 1 (QSCN6L1), mRNA. // chr9	NM_181701
3	3444436	NM_023922 // RefSeq // Homo sapiens taste receptor, type 2, member 14 (TAS2R14),	NM_023922 // Hs.408153 // eye; trachea; larynx; mixed; brain; uncharacterized ti	chr12	-	10982120	10983109	12	NM_023922 // TAS2R14 // taste receptor, type 2, member 14 // 12p13 // 50840 ///	0.272888	5.36793e-11	0.0176276	8.85932e-07	5.47182	5.47182	2.56369	7.41981	5.999	5.999	3.55302	8.19635	0.272888	-0.527178	NM_023922 // RefSeq // Homo sapiens taste receptor, type 2, member 14 (TAS2R14),	NM_023922
[truncated: 12,226 more rows]

## Sheet: BonferroniCorrection-ST3
AFFYMETRIX_EXON_GENE_ID	Gene Name	match	Probesets#	total_probes	Transcript	Acc	ID	seqname	strand	start	stop	gene_assignment	p-value(Diagnosis)	p-value(Diagnosis*Probe)	Mean(1)	LSMean(1)	Min(1)	Max(1)	Mean(2)	LSMean(2)	Min(2)	Max(2)	p-value(1-2)	Mean(1-2)	source
[truncated: 30 more rows]

[truncated: 3 more sheets: textfile-ST4, eliminatesingleprobesets-ST5, primers_ST]
